# Supplementary material
Source: PubMed Central journal article supplement (PMC3587035)

**Photoinduced Intramolecular Cyclopentanation vs Photoprotolytic Oxametathesis in Polycyclic Alkenes Outfitted  
with Conformationally Constrained Aroylmethyl Chromophores. ‡**

Roman A. Valiulin, Teresa M. Arisco, and Andrei G. Kutateladze\*

*Department of Chemistry & Biochemistry, University of Denver, Denver, CO 80208*

*akutatel@du.edu*

**SUPPORTING INFORMATION**

**Table of contents:**

|                                 |            |
|---------------------------------|------------|
| <b>XRay Structures .....</b>    | <b>S2</b>  |
| <b>Computational Data .....</b> | <b>S5</b>  |
| <b>NMR Spectra .....</b>        | <b>S21</b> |

**XRAY STRUCTURES**

(cif file is included as a separate file)

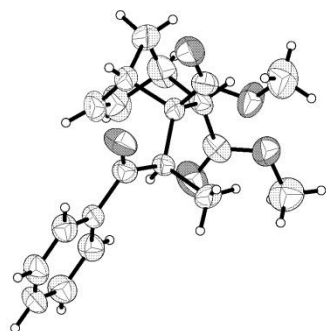**7d**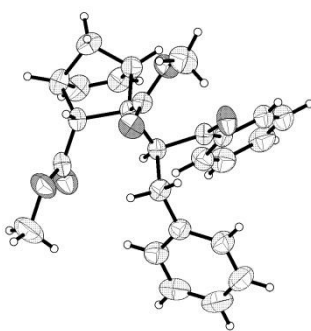**7f**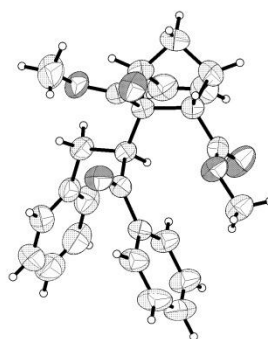**7f'**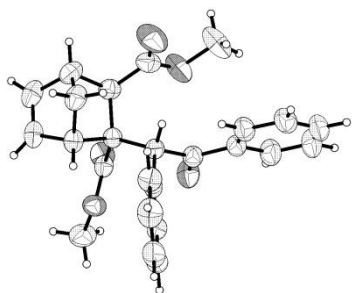**7f-exo**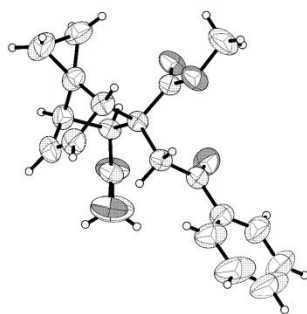**7c**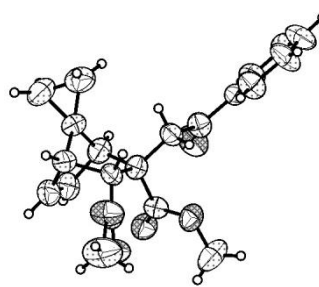**7c-exo**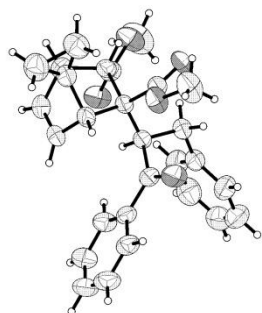**7g**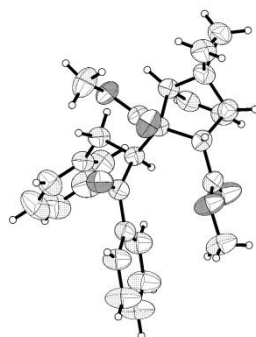**7g'**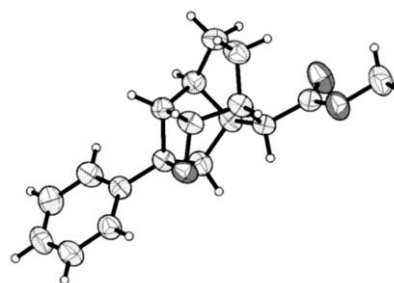**10a**

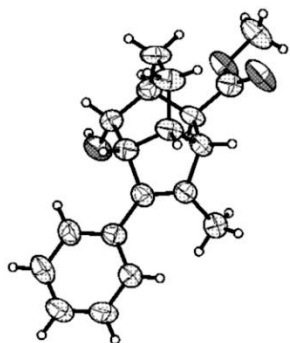

14

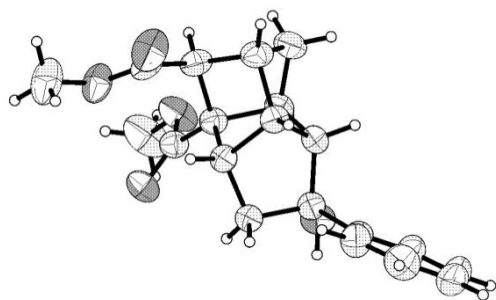

15

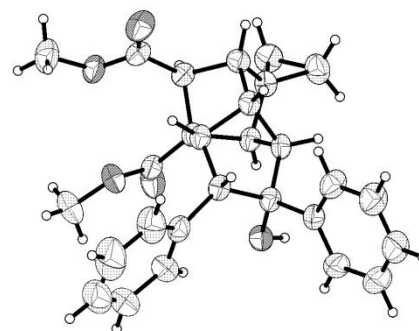

22

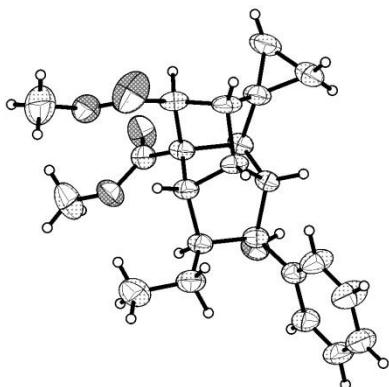

26

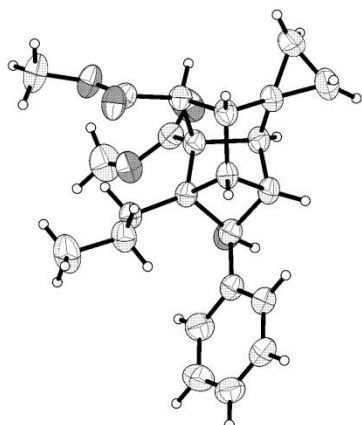

27

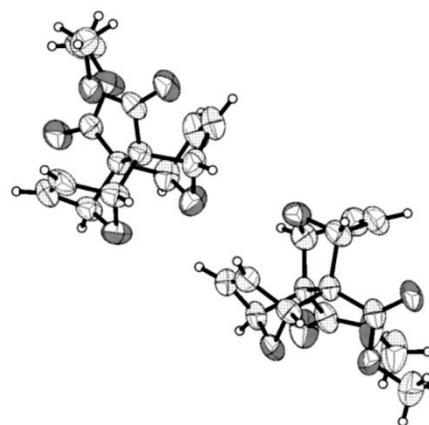

29/30

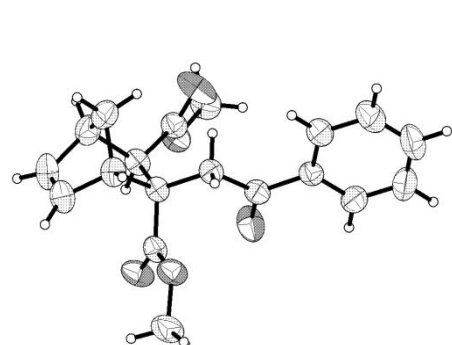

7i

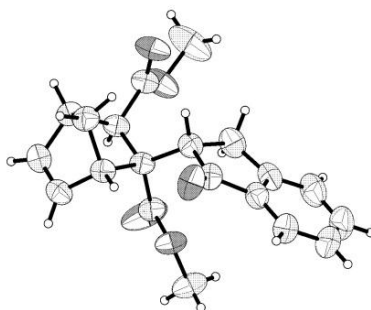

7m

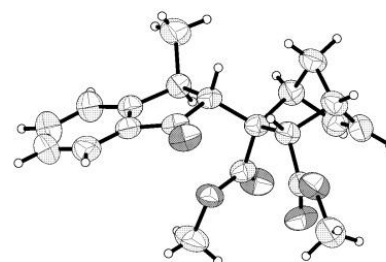

7n

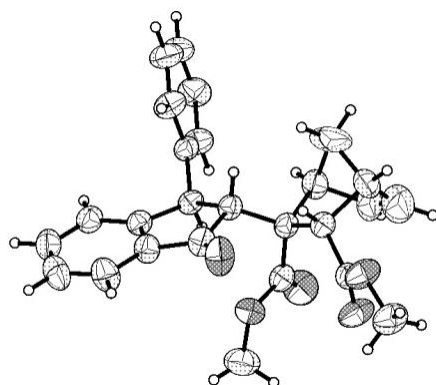**7o**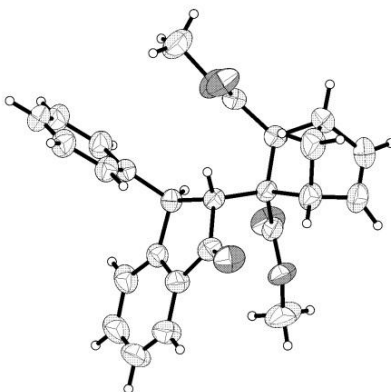**7o'**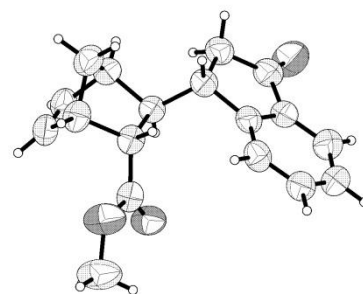**7p**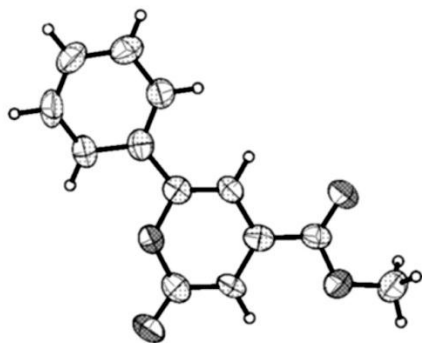**31**

## COMPUTATIONAL DATA

Computations were carried out using Gaussian 09, Revision A.02, M. J. Frisch, G. W. Trucks, H. B. Schlegel, G. E. Scuseria, M. A. Robb, J. R. Cheeseman, G. Scalmani, V. Barone, B. Mennucci, G. A. Petersson, H. Nakatsuji, M. Caricato, X. Li, H. P. Hratchian, A. F. Izmaylov, J. Bloino, G. Zheng, J. L. Sonnenberg, M. Hada, M. Ehara, K. Toyota, R. Fukuda, J. Hasegawa, M. Ishida, T. Nakajima, Y. Honda, O. Kitao, H. Nakai, T. Vreven, J. A. Montgomery, Jr., J. E. Peralta, F. Ogliaro, M. Bearpark, J. J. Heyd, E. Brothers, K. N. Kudin, V. N. Staroverov, R. Kobayashi, J. Normand, K. Raghavachari, A. Rendell, J. C. Burant, S. S. Iyengar, J. Tomasi, M. Cossi, N. Rega, J. M. Millam, M. Klene, J. E. Knox, J. B. Cross, V. Bakken, C. Adamo, J. Jaramillo, R. Gomperts, R. E. Stratmann, O. Yazyev, A. J. Austin, R. Cammi, C. Pomelli, J. W. Ochterski, R. L. Martin, K. Morokuma, V. G. Zakrzewski, G. A. Voth, P. Salvador, J. J. Dannenberg, S. Dapprich, A. D. Daniels, O. Farkas, J. B. Foresman, J. V. Ortiz, J. Cioslowski, and D. J. Fox, Gaussian, Inc., Wallingford CT, 2009.

**Table S1.** Computational comparison of the parent bicyclo[2.2.1]heptane system: gamma and delta oxetanes

| Gamma oxetane<br>B3LYP/6-311+G(d,p)<br>-656.563347295 Hartrees                                                                                                                                                                                                                                                                                                                                                                                                                                                                                                                                                                                                                                                                                                                                                                                                                                           | Delta oxetane<br>B3LYP/6-311+G(d,p)<br>-656.587392075 Hartrees                                                                                                                                                                                                                                                                                                                                                                                                                                                                                                                                                                                                                                                                                                                                                                                                                                              | $\Delta E = -15.1$ kcal/mol<br>(gamma oxetane is higher in energy) |
|----------------------------------------------------------------------------------------------------------------------------------------------------------------------------------------------------------------------------------------------------------------------------------------------------------------------------------------------------------------------------------------------------------------------------------------------------------------------------------------------------------------------------------------------------------------------------------------------------------------------------------------------------------------------------------------------------------------------------------------------------------------------------------------------------------------------------------------------------------------------------------------------------------|-------------------------------------------------------------------------------------------------------------------------------------------------------------------------------------------------------------------------------------------------------------------------------------------------------------------------------------------------------------------------------------------------------------------------------------------------------------------------------------------------------------------------------------------------------------------------------------------------------------------------------------------------------------------------------------------------------------------------------------------------------------------------------------------------------------------------------------------------------------------------------------------------------------|--------------------------------------------------------------------|
|                                                                                                                                                                                                                                                                                                                                                                                                                                                                                                                                                                                                                                                                                                                                                                                                                                                                                                          |                                                                                                                                                                                                                                                                                                                                                                                                                                                                                                                                                                                                                                                                                                                                                                                                                                                                                                             |                                                                    |
| C 0.6204 0.1910 1.5280<br>C 3.3510 0.0339 -0.8613<br>C 2.1803 1.6586 0.3328<br>C 0.9523 -0.0643 -1.0428<br>C 2.1249 0.9760 -1.0351<br>C 2.7150 -0.7559 0.3109<br>C 2.1206 0.3949 1.2407<br>C 1.5601 -1.3758 -0.5155<br>C -0.0085 -0.3134 0.2175<br>O 0.3642 -1.7316 0.1943<br>C -1.4859 -0.0871 0.0641<br>C -2.3798 -1.1605 0.0829<br>C -3.7507 -0.9388 -0.0502<br>C -4.2427 0.3542 -0.2113<br>C -3.3544 1.4300 -0.2376<br>C -1.9868 1.2103 -0.0980<br>H 0.4192 -0.5727 2.2837<br>H 0.1800 1.1288 1.8757<br>H 4.2649 0.5741 -0.6046<br>H 3.5563 -0.5989 -1.7298<br>H 1.3526 2.3432 0.5332<br>H 3.1107 2.2228 0.4412<br>H 0.3975 -0.1323 -1.9769<br>H 2.1413 1.6419 -1.8984<br>H 3.3484 -1.4732 0.8327<br>H 2.6968 0.4997 2.1613<br>H 1.8899 -2.1742 -1.1835<br>H -1.9917 -2.1647 0.1967<br>H -4.4342 -1.7807 -0.0304<br>H -5.3081 0.5246 -0.3177<br>H -3.7276 2.4399 -0.3675<br>H -1.3047 2.0544 -0.1217 | C 0.5486 -0.7487 1.3782<br>C 3.2491 -0.4306 -1.0752<br>C 2.8593 0.3766 1.1236<br>C 1.4479 1.1220 -0.8171<br>C 2.9034 0.8827 -0.3305<br>C 2.0265 -1.2075 -0.5412<br>C 2.0301 -0.9418 1.0056<br>C 0.8669 -0.3033 -1.0040<br>C -0.0415 0.0562 0.2094<br>O 0.4804 1.4257 0.2246<br>C -1.5418 0.0172 0.0726<br>C -2.3049 1.1807 0.1982<br>C -3.6945 1.1313 0.0829<br>C -4.3383 -0.0779 -0.1680<br>C -3.5827 -1.2430 -0.3026<br>C -2.1968 -1.1951 -0.1802<br>H 0.0427 -1.7177 1.4424<br>H 0.4011 -0.2306 2.3296<br>H 4.2117 -0.8489 -0.7689<br>H 3.2434 -0.3342 -2.1654<br>H 2.4070 1.0922 1.8101<br>H 3.8771 0.1696 1.4667<br>H 1.3750 1.8388 -1.6379<br>H 3.5756 1.7257 -0.4976<br>H 1.9472 -2.2573 -0.8266<br>H 2.4844 -1.7546 1.5758<br>H 0.3890 -0.5518 -1.9497<br>H -1.7992 2.1202 0.3805<br>H -4.2734 2.0425 0.1868<br>H -5.4180 -0.1143 -0.2607<br>H -4.0732 -2.1891 -0.5037<br>H -1.6216 -2.1091 -0.2901 |                                                                    |

**Table S2.** Computational comparison of the parent bicyclo[2.2.2]octane system: gamma and delta oxetanes

| Gamma oxetane<br>B3LYP/6-311+G(d,p)<br>-695.907398932 Hartrees                                                                                                                                                                                                                                                                                                                                                                                                                                                                                                                                                                                                                                                                                                                                                                                                                                                                                                                                      | Delta oxetane<br>B3LYP/6-311+G(d,p)<br>-695.922507038 Hartrees                                                                                                                                                                                                                                                                                                                                                                                                                                                                                                                                                                                                                                                                                                                                                                                                                                                                                                                                  | $\Delta E = -9.5$ kcal/mol<br>(gamma oxetane is higher in energy) |
|-----------------------------------------------------------------------------------------------------------------------------------------------------------------------------------------------------------------------------------------------------------------------------------------------------------------------------------------------------------------------------------------------------------------------------------------------------------------------------------------------------------------------------------------------------------------------------------------------------------------------------------------------------------------------------------------------------------------------------------------------------------------------------------------------------------------------------------------------------------------------------------------------------------------------------------------------------------------------------------------------------|-------------------------------------------------------------------------------------------------------------------------------------------------------------------------------------------------------------------------------------------------------------------------------------------------------------------------------------------------------------------------------------------------------------------------------------------------------------------------------------------------------------------------------------------------------------------------------------------------------------------------------------------------------------------------------------------------------------------------------------------------------------------------------------------------------------------------------------------------------------------------------------------------------------------------------------------------------------------------------------------------|-------------------------------------------------------------------|
| 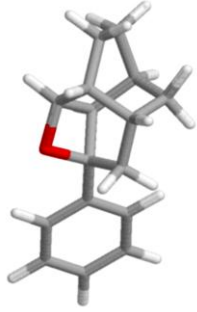                                                                                                                                                                                                                                                                                                                                                                                                                                                                                                                                                                                                                                                                                                                                                                                                                                                                                                                   |                                                                                                                                                                                                                                                                                                                                                                                                                                                                                                                                                                                                                                                                                                                                                                                                                                                                                                                |                                                                   |
| C -1.3619 -1.3224 -0.4445<br>C -0.7316 -0.0052 -0.9273<br>C -2.4299 -0.8877 0.5735<br>O -0.1198 -1.7398 0.1654<br>C -1.7505 1.1606 -0.8948<br>C -1.9774 1.6013 0.5621<br>C -3.6262 -0.4084 -0.2816<br>C -1.8384 0.3111 1.4053<br>C 0.2655 -0.3279 0.2649<br>C -0.3218 0.1246 1.6148<br>C 1.7390 -0.0989 0.0765<br>C 2.6094 -1.1753 -0.1121<br>C 3.9750 -0.9553 -0.2933<br>C 4.4852 0.3408 -0.2986<br>C 3.6206 1.4206 -0.1174<br>C 2.2588 1.2015 0.0726<br>C -3.1035 0.5755 -1.3729<br>H -0.2197 -0.1031 -1.8850<br>H -2.7085 -1.7171 1.2284<br>H -1.4362 1.9887 -1.5340<br>H -2.9631 2.0651 0.6641<br>H -4.3690 0.0784 0.3567<br>H -4.1263 -1.2649 -0.7434<br>H -2.3588 0.4029 2.3623<br>H 0.1223 1.0576 1.9720<br>H -0.0820 -0.6579 2.3400<br>H 2.2059 -2.1799 -0.1179<br>H 4.6400 -1.8005 -0.4335<br>H 5.5462 0.5104 -0.4433<br>H 4.0076 2.4337 -0.1226<br>H 1.5968 2.0501 0.2125<br>H -3.8226 1.3824 -1.5411<br>H -2.9751 0.0607 -2.3305<br>H -1.7266 -2.0619 -1.1619<br>H -1.2454 2.3442 0.8915 | C 0.6926 0.3092 -0.8441<br>C 1.2436 -1.1341 -0.7247<br>C 1.6897 1.3069 -0.2376<br>O 0.1920 -1.5104 0.2037<br>C 2.6474 -1.1266 -0.1073<br>C 2.5957 -0.4773 1.2920<br>C 3.0602 1.2279 -0.9334<br>C 1.7347 0.8160 1.2374<br>C -0.2969 -0.1342 0.2802<br>C 0.2478 0.5451 1.5505<br>C -1.7862 -0.0398 0.0710<br>C -2.4038 1.2090 -0.0793<br>C -3.7792 1.3041 -0.2718<br>C -4.5628 0.1503 -0.3096<br>C -3.9566 -1.0947 -0.1610<br>C -2.5769 -1.1907 0.0227<br>C 3.5229 -0.2538 -1.0317<br>H 1.2023 -1.7513 -1.6272<br>H 1.2956 2.3274 -0.2846<br>H 3.0450 -2.1439 -0.0471<br>H 3.6172 -0.2431 1.6095<br>H 0.2610 0.5859 -1.8053<br>H 3.7848 1.8218 -0.3672<br>H 3.0030 1.6808 -1.9275<br>H 2.1467 1.5743 1.9087<br>H 0.0906 -0.0870 2.4284<br>H -0.2793 1.4898 1.7178<br>H -1.8076 2.1157 -0.0531<br>H -4.2401 2.2784 -0.3920<br>H -5.6346 0.2236 -0.4558<br>H -4.5572 -1.9973 -0.1909<br>H -2.0995 -2.1567 0.1258<br>H 4.5749 -0.3517 -0.7507<br>H 3.4426 -0.6138 -2.0634<br>H 2.1849 -1.1740 2.0255 |                                                                   |

**Table S3.** Computational comparison in the bicyclo[2.2.2]octane system with vicinal exo-COOMe group: gamma and delta oxetanes

| Gamma oxetane<br>B3LYP/6-311+G(d,p)<br>-923.847043399 Hartrees                                                                                                                                                                                                                                                                                                                                                                                                                                                                                                                                                                                                                                                                                                                                                                                                                                                                                                                                                                                                                                                                                                         | Delta oxetane<br>B3LYP/6-311+G(d,p)<br>-923.864829830 Hartrees                                                                                                                                                                                                                                                                                                                                                                                                                                                                                                                                                                                                                                                                                                                                                                                                                                                                                                                                                                                                                                                                                                             | $\Delta E = -11.2$ kcal/mol<br>(gamma oxetane is higher in energy) |
|------------------------------------------------------------------------------------------------------------------------------------------------------------------------------------------------------------------------------------------------------------------------------------------------------------------------------------------------------------------------------------------------------------------------------------------------------------------------------------------------------------------------------------------------------------------------------------------------------------------------------------------------------------------------------------------------------------------------------------------------------------------------------------------------------------------------------------------------------------------------------------------------------------------------------------------------------------------------------------------------------------------------------------------------------------------------------------------------------------------------------------------------------------------------|----------------------------------------------------------------------------------------------------------------------------------------------------------------------------------------------------------------------------------------------------------------------------------------------------------------------------------------------------------------------------------------------------------------------------------------------------------------------------------------------------------------------------------------------------------------------------------------------------------------------------------------------------------------------------------------------------------------------------------------------------------------------------------------------------------------------------------------------------------------------------------------------------------------------------------------------------------------------------------------------------------------------------------------------------------------------------------------------------------------------------------------------------------------------------|--------------------------------------------------------------------|
|                                                                                                                                                                                                                                                                                                                                                                                                                                                                                                                                                                                                                                                                                                                                                                                                                                                                                                                                                                                                                                                                                       |                                                                                                                                                                                                                                                                                                                                                                                                                                                                                                                                                                                                                                                                                                                                                                                                                                                                                                                                                                                                                                                                                           |                                                                    |
| C 0.1525 -2.1219 -0.4133<br>C 0.2991 -0.7064 -0.9938<br>C -1.0615 -2.0209 0.5256<br>O 1.4250 -2.0187 0.2637<br>C -1.0702 0.0116 -1.1129<br>C -1.4774 0.4859 0.3006<br>C -2.2884 -2.0900 -0.4090<br>C -0.9895 -0.6302 1.2605<br>C 1.2728 -0.5615 0.2573<br>C 0.4812 -0.2667 1.5483<br>C 2.5755 0.1715 0.0970<br>C 3.7790 -0.5307 -0.0064<br>C 4.9844 0.1539 -0.1606<br>C 5.0012 1.5452 -0.2238<br>C 3.8025 2.2524 -0.1287<br>C 2.5999 1.5702 0.0344<br>C -2.0970 -1.0587 -1.5625<br>C -2.9373 0.8782 0.4410<br>O -3.7344 0.4159 1.2214<br>O -3.2429 1.8843 -0.4110<br>C -4.5917 2.3845 -0.3444<br>H 0.1159 -2.9941 -1.0705<br>H 0.8713 -0.6792 -1.9213<br>H -1.0660 -2.8349 1.2544<br>H -1.0362 0.8423 -1.8187<br>H -0.9359 1.4112 0.5284<br>H -3.1984 -1.8813 0.1555<br>H -2.3892 -3.1009 -0.8149<br>H -1.5920 -0.6481 2.1694<br>H 0.5584 0.7778 1.8615<br>H 0.9249 -0.8823 2.3350<br>H 3.7590 -1.6123 0.0345<br>H 5.9118 -0.4036 -0.2336<br>H 5.9386 2.0759 -0.3469<br>H 3.8048 3.3357 -0.1792<br>H 1.6750 2.1333 0.1083<br>H -3.0465 -0.5862 -1.8273<br>H -1.7338 -1.5504 -2.4701<br>H -5.3049 1.5934 -0.5807<br>H -4.6433 3.1799 -1.0848<br>H -4.8060 2.7724 0.6523 | C 0.5716 1.0487 0.7267<br>C -0.0983 -0.0712 1.5595<br>C -0.4587 1.6835 -0.2163<br>O 0.6925 -1.0986 0.9090<br>C -1.6020 -0.1531 1.2585<br>C -1.7753 -0.4783 -0.2528<br>C -3.2334 -0.4053 -0.6703<br>C -2.1884 1.2388 1.5761<br>C -0.8550 0.4582 -1.0875<br>C 1.2621 -0.1297 -0.0314<br>C 0.5096 -0.2035 -1.3734<br>C 2.7637 -0.2185 -0.1089<br>C 3.4504 -1.2717 0.5005<br>C 4.8405 -1.3528 0.4161<br>C 5.5627 -0.3780 -0.2677<br>C 4.8852 0.6815 -0.8717<br>C 3.4972 0.7577 -0.7958<br>O -3.7201 0.3781 -1.4510<br>O -3.9575 -1.3638 -0.0481<br>C -5.3612 -1.4049 -0.3642<br>C -1.6444 2.2812 0.5596<br>H 1.2167 1.7374 1.2706<br>H 0.0862 -0.0617 2.6377<br>H 0.0085 2.4471 -0.8462<br>H -2.0781 -0.9265 1.8645<br>H -1.4720 -1.5181 -0.3981<br>H -3.2807 1.2059 1.5532<br>H -1.9135 1.5149 2.5999<br>H -1.3686 0.7564 -2.0019<br>H 0.4393 -1.2356 -1.7267<br>H 1.0500 0.3735 -2.1300<br>H 2.8859 -2.0197 1.0422<br>H 5.3588 -2.1791 0.8902<br>H 6.6435 -0.4396 -0.3289<br>H 5.4383 1.4487 -1.4024<br>H 2.9841 1.5886 -1.2695<br>H -5.5073 -1.5854 -1.4301<br>H -5.8432 -0.4646 -0.0923<br>H -5.7668 -2.2266 0.2220<br>H -2.4255 2.5672 -0.1490<br>H -1.3328 3.1947 1.0741 |                                                                    |

**Table S4.** Comparison of gamma and delta oxetanes in spirocyclopropano-norbornene series

| Gamma oxetane <b>10d</b> (not observed)<br>B3LYP/6-311+G(d,p)<br>-1189.87050995 Hartrees                                                                                                                                                                                                                                                                                                                                                                                                                                                                                                                                                                                                                                                                                                                                                                                                                                                                                                                                                                                                                                                                                                                                                                                                                                                                             | Delta oxetane <b>8d</b> (observed)<br>B3LYP/6-311+G(d,p)<br>-1189.84528918 Hartrees                                                                                                                                                                                                                                                                                                                                                                                                                                                                                                                                                                                                                                                                                                                                                                                                                                                                                                                                                                                                                                                                                                                                                                                                                                                                                    | $\Delta E = -15.8$ kcal/mol<br>(gamma oxetane is higher in energy) |
|----------------------------------------------------------------------------------------------------------------------------------------------------------------------------------------------------------------------------------------------------------------------------------------------------------------------------------------------------------------------------------------------------------------------------------------------------------------------------------------------------------------------------------------------------------------------------------------------------------------------------------------------------------------------------------------------------------------------------------------------------------------------------------------------------------------------------------------------------------------------------------------------------------------------------------------------------------------------------------------------------------------------------------------------------------------------------------------------------------------------------------------------------------------------------------------------------------------------------------------------------------------------------------------------------------------------------------------------------------------------|------------------------------------------------------------------------------------------------------------------------------------------------------------------------------------------------------------------------------------------------------------------------------------------------------------------------------------------------------------------------------------------------------------------------------------------------------------------------------------------------------------------------------------------------------------------------------------------------------------------------------------------------------------------------------------------------------------------------------------------------------------------------------------------------------------------------------------------------------------------------------------------------------------------------------------------------------------------------------------------------------------------------------------------------------------------------------------------------------------------------------------------------------------------------------------------------------------------------------------------------------------------------------------------------------------------------------------------------------------------------|--------------------------------------------------------------------|
| 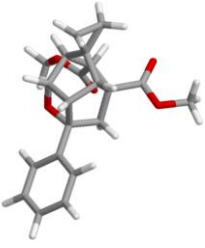                                                                                                                                                                                                                                                                                                                                                                                                                                                                                                                                                                                                                                                                                                                                                                                                                                                                                                                                                                                                                                                                                                                                                                                                                                                                                    |                                                                                                                                                                                                                                                                                                                                                                                                                                                                                                                                                                                                                                                                                                                                                                                                                                                                                                                                                                                                                                                                                                                                                                                                                                                                                       |                                                                    |
| C -0.5247 -0.3786 1.5189<br>C -0.1055 1.1108 1.6036<br>C 0.7986 -1.0871 1.1633<br>O -0.9033 1.4445 0.4358<br>C 1.4280 1.0908 1.3634<br>C 1.6905 0.7858 -0.1287<br>C 1.3595 1.8657 -1.1354<br>C 1.7982 -0.2650 1.9696<br>C 1.0111 -0.6154 -0.3429<br>C 1.9393 -1.5581 -1.0971<br>C -1.2658 0.0385 0.2183<br>C -0.4259 -0.5592 -0.9136<br>C -2.7553 -0.1560 0.0977<br>C -3.6119 0.9373 -0.0506<br>C -4.9880 0.7448 -0.1743<br>C -5.5254 -0.5397 -0.1433<br>C -4.6767 -1.6360 0.0117<br>C -3.3028 -1.4448 0.1282<br>O 3.1099 -1.3602 -1.3200<br>O 1.3125 -2.6987 -1.4591<br>C 2.1199 -3.6683 -2.1533<br>O 1.0768 1.6825 -2.2956<br>O 1.5306 3.0951 -0.6036<br>C 1.2964 4.2007 -1.4940<br>C 3.1832 -0.6864 2.3534<br>C 2.1159 -0.5086 3.4186<br>H -1.1023 -0.8074 2.3346<br>H -0.4071 1.6997 2.4711<br>H 0.8127 -2.1684 1.2990<br>H 1.9657 1.9589 1.7398<br>H 2.7684 0.6302 -0.2462<br>H -0.7695 -1.5749 -1.1162<br>H -0.4988 0.0197 -1.8332<br>H -3.1915 1.9345 -0.0635<br>H -6.5955 -0.6874 -0.2363<br>H -5.6404 1.6030 -0.2931<br>H -2.6540 -2.3066 0.2495<br>H -5.0852 -2.6401 0.0420<br>H 1.4517 -4.4984 -2.3725<br>H 2.9485 -3.9966 -1.5242<br>H 2.5171 -3.2407 -3.0744<br>H 1.9667 4.1496 -2.3531<br>H 1.4938 5.0945 -0.9057<br>H 0.2630 4.1924 -1.8430<br>H 3.9758 0.0517 2.3006<br>H 3.5007 -1.6949 2.1142<br>H 2.1979 0.3474 4.0791<br>H 1.7174 -1.3998 3.8914 | C -0.1417 -2.2974 0.5449<br>C 0.4717 -1.6141 -0.6918<br>C -1.4960 -1.5427 0.5610<br>O 0.8845 -1.8178 1.4179<br>C -0.7534 -1.1257 -1.5435<br>C -1.2129 0.2657 -1.0916<br>C -0.4487 1.4495 -1.6377<br>C -1.8939 -1.9133 -0.8724<br>C -1.2014 0.0490 0.4620<br>C -2.3902 -3.2720 -1.2794<br>C -3.2793 -2.0503 -1.4199<br>C -2.3274 0.8050 1.1481<br>C 1.1528 -0.7390 0.4580<br>C 0.2273 0.3901 0.9406<br>C 2.6147 -0.3932 0.3755<br>C 3.1227 0.3131 -0.7209<br>C 4.4736 0.6502 -0.7740<br>C 5.3314 0.2880 0.2643<br>C 4.8303 -0.4206 1.3543<br>C 3.4797 -0.7626 1.4097<br>O -3.4459 0.9089 0.7017<br>O -1.9638 1.3089 2.3427<br>C -2.9953 1.9948 3.0782<br>O 0.4351 1.3963 -2.4610<br>O -0.9217 2.6098 -1.1367<br>C -0.3096 3.8174 -1.6314<br>H -0.2661 -3.3786 0.6084<br>H 1.2095 -2.1906 -1.2452<br>H -2.1811 -1.8159 1.3631<br>H -0.6362 -1.2438 -2.6193<br>H -2.2492 0.4187 -1.4060<br>H -1.9903 -3.7162 -2.1842<br>H -2.6326 -3.9887 -0.5017<br>H -4.1145 -1.9394 -0.7388<br>H -3.4701 -1.6786 -2.4215<br>H 0.5256 1.3717 0.5691<br>H 0.3064 0.4204 2.0268<br>H 2.4654 0.5932 -1.5363<br>H 6.3826 0.5505 0.2201<br>H 4.8568 1.1928 -1.6313<br>H 3.0909 -1.3285 2.2468<br>H 5.4917 -0.7136 2.1624<br>H -3.3689 2.8438 2.5047<br>H -2.5206 2.3296 3.9979<br>H -3.8222 1.3176 3.2957<br>H -0.4378 3.8922 -2.7119<br>H 0.7549 3.8311 -1.3935<br>H -0.8258 4.6308 -1.1267 |                                                                    |



**Table S4.** Comparison of gamma and delta initial Paternò-Büchi 1,4-diradicals in the parent bicyclo[2.2.1]heptane system

| Gamma 1,4-diradical (triplet)<br>B3LYP/6-311+G(d,p)<br>-656.516623962 Hartrees                                                                                                                                                                                                                                                                                                                                                                                                                                                                                                                                                                                                                                                                                                                                                                                                                               | Delta 1,4-diradical (triplet)<br>B3LYP/6-311+G(d,p)<br>-656.500143424 Hartrees                                                                                                                                                                                                                                                                                                                                                                                                                                                                                                                                                                                                                                                                                                                                                                                                                                  | $\Delta E = 10.3$ kcal/mol<br>(triplet gamma diradical is lower in energy) |
|--------------------------------------------------------------------------------------------------------------------------------------------------------------------------------------------------------------------------------------------------------------------------------------------------------------------------------------------------------------------------------------------------------------------------------------------------------------------------------------------------------------------------------------------------------------------------------------------------------------------------------------------------------------------------------------------------------------------------------------------------------------------------------------------------------------------------------------------------------------------------------------------------------------|-----------------------------------------------------------------------------------------------------------------------------------------------------------------------------------------------------------------------------------------------------------------------------------------------------------------------------------------------------------------------------------------------------------------------------------------------------------------------------------------------------------------------------------------------------------------------------------------------------------------------------------------------------------------------------------------------------------------------------------------------------------------------------------------------------------------------------------------------------------------------------------------------------------------|----------------------------------------------------------------------------|
| 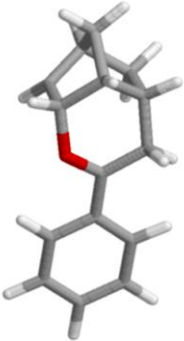                                                                                                                                                                                                                                                                                                                                                                                                                                                                                                                                                                                                                                                                                                                                                                                                                            |                                                                                                                                                                                                                                                                                                                                                                                                                                                                                                                                                                                                                                                                                                                                                                                                                                |                                                                            |
| C 1.6635 -1.2202 -0.5237<br>C 1.9155 -1.2831 0.9576<br>C 2.5781 -0.0452 -0.9487<br>O 0.2654 -1.0569 -0.8711<br>C 2.9232 -0.2281 1.2907<br>C 2.1993 1.1498 1.1452<br>C 3.7799 -0.2382 -0.0047<br>C 1.9313 1.2515 -0.3947<br>C -0.3365 0.1267 -0.5369<br>C 0.4505 1.3774 -0.7861<br>C -1.7204 0.0610 -0.2214<br>C -2.5062 1.2293 -0.0107<br>C -3.8507 1.1391 0.3134<br>C -4.4773 -0.1054 0.4338<br>C -3.7270 -1.2668 0.2177<br>C -2.3820 -1.1950 -0.1038<br>H 1.9346 -2.1455 -1.0432<br>H 1.2797 -1.8122 1.6555<br>H 2.7875 -0.0188 -2.0187<br>H 3.4505 -0.3549 2.2365<br>H 2.8514 1.9592 1.4877<br>H 1.2784 1.1899 1.7312<br>H 4.4936 0.5892 -0.0560<br>H 4.3135 -1.1795 -0.1594<br>H 2.4642 2.1151 -0.8019<br>H 0.0041 2.2202 -0.2555<br>H 0.3939 1.6228 -1.8599<br>H -2.0567 2.2101 -0.1039<br>H -4.4210 2.0483 0.4717<br>H -5.5291 -0.1685 0.6871<br>H -4.2023 -2.2385 0.3020<br>H -1.8126 -2.0992 -0.2716 | C -1.9476 -0.4054 1.4729<br>C -1.6795 -1.3076 0.3098<br>C -2.8021 0.6828 0.9194<br>O -0.3160 -1.1236 -0.1866<br>C -2.7711 -0.8746 -0.7323<br>C -2.2430 0.3652 -1.4688<br>C -3.8343 -0.2007 0.1672<br>C -1.9626 1.3249 -0.2743<br>C 0.3100 0.0883 -0.0302<br>C -0.4523 1.4001 0.0137<br>C 1.7313 0.0343 -0.0164<br>C 2.4245 -1.2081 -0.0850<br>C 3.8082 -1.2555 -0.0696<br>C 4.5678 -0.0827 0.0162<br>C 3.9082 1.1478 0.0872<br>C 2.5232 1.2143 0.0706<br>H -1.3631 -0.3961 2.3834<br>H -1.7211 -2.3750 0.5354<br>H -3.1885 1.4116 1.6308<br>H -3.1114 -1.6865 -1.3750<br>H -3.0135 0.7586 -2.1364<br>H -1.3515 0.1722 -2.0658<br>H -4.5675 0.3647 -0.4152<br>H -4.3624 -0.8820 0.8379<br>H -2.3270 2.3360 -0.4722<br>H -0.0047 2.0658 -0.7358<br>H -0.2842 1.8960 0.9807<br>H 1.8490 -2.1214 -0.1516<br>H 4.3075 -2.2173 -0.1248<br>H 5.6506 -0.1276 0.0285<br>H 4.4830 2.0654 0.1575<br>H 2.0466 2.1846 0.1321 |                                                                            |

**Table S5.** Comparison of gamma and delta initial Paternò-Büchi 1,4-diradicals in the parent bicyclo[2.2.2]octane system

| Gamma 1,4-diradical (triplet)<br>B3LYP/6-311+G(d,p)<br>-695.850204621                                                                                                                                                                                                                                                                                                                                                                                                                                                                                                                                                                                                                                                                                                                                                                                                                                                                                                                       | Delta 1,4-diradical (triplet)<br>B3LYP/6-311+G(d,p)<br>-695.839710157 Hartrees                                                                                                                                                                                                                                                                                                                                                                                                                                                                                                                                                                                                                                                                                                                                                                                                                                                                                                              | $\Delta E = 6.6$ kcal/mol<br>(triplet gamma diradical is lower in energy) |
|---------------------------------------------------------------------------------------------------------------------------------------------------------------------------------------------------------------------------------------------------------------------------------------------------------------------------------------------------------------------------------------------------------------------------------------------------------------------------------------------------------------------------------------------------------------------------------------------------------------------------------------------------------------------------------------------------------------------------------------------------------------------------------------------------------------------------------------------------------------------------------------------------------------------------------------------------------------------------------------------|---------------------------------------------------------------------------------------------------------------------------------------------------------------------------------------------------------------------------------------------------------------------------------------------------------------------------------------------------------------------------------------------------------------------------------------------------------------------------------------------------------------------------------------------------------------------------------------------------------------------------------------------------------------------------------------------------------------------------------------------------------------------------------------------------------------------------------------------------------------------------------------------------------------------------------------------------------------------------------------------|---------------------------------------------------------------------------|
| 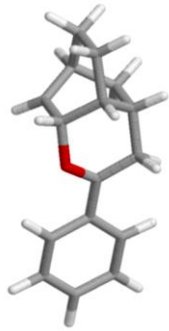                                                                                                                                                                                                                                                                                                                                                                                                                                                                                                                                                                                                                                                                                                                                                                                                                                                                                                           |                                                                                                                                                                                                                                                                                                                                                                                                                                                                                                                                                                                                                                                                                                                                                                                                                                                                                                            |                                                                           |
| C 1.4214 -1.1581 -0.5729<br>C 1.6796 -1.2713 0.8948<br>C 2.2130 0.0446 -1.1032<br>O -0.0088 -1.0294 -0.8591<br>C 2.5547 -0.2011 1.4666<br>C 1.9054 1.1727 1.1426<br>C 3.9306 -0.2527 0.7509<br>C 1.6433 1.2910 -0.3915<br>C -0.6197 0.1434 -0.5041<br>C 0.1448 1.4162 -0.7286<br>C -2.0059 0.0568 -0.1994<br>C -2.8076 1.2125 0.0188<br>C -4.1548 1.1021 0.3259<br>C -4.7682 -0.1510 0.4211<br>C -4.0014 -1.3004 0.1980<br>C -2.6537 -1.2082 -0.1064<br>C 3.7082 -0.1431 -0.7853<br>H 1.6846 -2.0750 -1.1112<br>H 1.1771 -2.0229 1.4913<br>H 2.0646 0.1312 -2.1837<br>H 2.6806 -0.3165 2.5453<br>H 2.5696 1.9735 1.4839<br>H 0.9678 1.2736 1.6959<br>H 4.5571 0.5676 1.1155<br>H 4.4449 -1.1830 1.0033<br>H 2.1502 2.1798 -0.7798<br>H -0.2945 2.2282 -0.1460<br>H 0.0497 1.7069 -1.7885<br>H -2.3689 2.1997 -0.0566<br>H -4.7377 2.0023 0.4896<br>H -5.8223 -0.2301 0.6603<br>H -4.4661 -2.2787 0.2632<br>H -2.0716 -2.1033 -0.2793<br>H 4.2681 0.7001 -1.2005<br>H 4.0785 -1.0390 -1.2937 | C 1.6893 -0.3334 -1.4297<br>C 1.4126 -1.2706 -0.3077<br>C 2.3946 0.8971 -0.9646<br>O 0.0305 -1.1185 0.1777<br>C 2.4214 -0.9851 0.8308<br>C 2.0469 0.3571 1.4855<br>C 3.8574 0.4961 -0.6184<br>C 1.6707 1.3460 0.3510<br>C -0.6027 0.0924 0.0856<br>C 0.1416 1.4097 0.1712<br>C -2.0229 0.0287 0.0317<br>C -2.7052 -1.2199 -0.0303<br>C -4.0875 -1.2763 -0.0867<br>C -4.8565 -0.1064 -0.0839<br>C -4.2077 1.1304 -0.0223<br>C -2.8241 1.2055 0.0362<br>C 3.8216 -0.8267 0.1969<br>H 1.2592 -0.4693 -2.4141<br>H 1.4496 -2.3191 -0.6129<br>H 2.3729 1.6989 -1.7057<br>H 2.4069 -1.8003 1.5575<br>H 2.8954 0.7264 2.0688<br>H 1.2129 0.2399 2.1805<br>H 4.3285 1.3010 -0.0440<br>H 4.4415 0.3733 -1.5331<br>H 2.0146 2.3538 0.6044<br>H -0.2680 1.9704 1.0237<br>H -0.0940 2.0167 -0.7145<br>H -2.1224 -2.1311 -0.0323<br>H -4.5784 -2.2429 -0.1340<br>H -5.9381 -0.1582 -0.1280<br>H -4.7898 2.0460 -0.0192<br>H -2.3557 2.1806 0.0833<br>H 4.5862 -0.8231 0.9785<br>H 4.0374 -1.6813 -0.4527 |                                                                           |

**Table S6.** Effect of the Me group in the tether on relative stability of the diradicals in the bicyclo[2.2.1]heptane parent system (Me is "in")

| Gamma 1,4-diradical (triplet)<br>Me is "in"<br>B3LYP/6-311+G(d,p)<br>-695.830712693 Hartrees                                                                                                                                                                                                                                                                                                                                                                                                                                                                                                                                                                                                                                                                                                                                                                                                                                                                                                 | Delta 1,4-diradical (triplet)<br>Me is "in"<br>B3LYP/6-311+G(d,p)<br>-695.819399207                                                                                                                                                                                                                                                                                                                                                                                                                                                                                                                                                                                                                                                                                                                                                                                                                                                                                                                | $\Delta E = 7.1$ kcal/mol<br>(triplet gamma diradical is lower in energy) |
|----------------------------------------------------------------------------------------------------------------------------------------------------------------------------------------------------------------------------------------------------------------------------------------------------------------------------------------------------------------------------------------------------------------------------------------------------------------------------------------------------------------------------------------------------------------------------------------------------------------------------------------------------------------------------------------------------------------------------------------------------------------------------------------------------------------------------------------------------------------------------------------------------------------------------------------------------------------------------------------------|----------------------------------------------------------------------------------------------------------------------------------------------------------------------------------------------------------------------------------------------------------------------------------------------------------------------------------------------------------------------------------------------------------------------------------------------------------------------------------------------------------------------------------------------------------------------------------------------------------------------------------------------------------------------------------------------------------------------------------------------------------------------------------------------------------------------------------------------------------------------------------------------------------------------------------------------------------------------------------------------------|---------------------------------------------------------------------------|
| 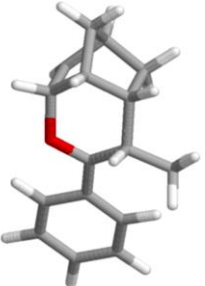                                                                                                                                                                                                                                                                                                                                                                                                                                                                                                                                                                                                                                                                                                                                                                                                                                                                                                            |                                                                                                                                                                                                                                                                                                                                                                                                                                                                                                                                                                                                                                                                                                                                                                                                                                                                                                                   |                                                                           |
| C 1.5941 -1.3691 -0.6221<br>C 1.6935 -1.5717 0.8658<br>C 2.6288 -0.2447 -0.8545<br>O 0.2595 -1.0409 -1.0819<br>C 2.7250 -0.6176 1.3830<br>C 2.1073 0.8158 1.2799<br>C 3.7102 -0.5923 0.1846<br>C 2.0075 1.0473 -0.2668<br>C -0.3087 0.1197 -0.6018<br>C 0.5821 1.3280 -0.8105<br>C -1.6840 -0.0125 -0.2360<br>C -2.4961 1.0405 0.2751<br>C -3.8205 0.8266 0.6262<br>C -4.4112 -0.4319 0.4873<br>C -3.6374 -1.4842 -0.0117<br>C -2.3126 -1.2890 -0.3627<br>C 0.1021 2.7074 -0.3433<br>H 1.8358 -2.2694 -1.1970<br>H 0.9546 -2.1014 1.4529<br>H 2.9494 -0.1511 -1.8927<br>H 3.1393 -0.8511 2.3640<br>H 2.7694 1.5485 1.7513<br>H 1.1372 0.8729 1.7783<br>H 4.4770 0.1830 0.2723<br>H 4.1953 -1.5555 0.0075<br>H 2.6343 1.8981 -0.5518<br>H 0.6986 1.3957 -1.9061<br>H -2.0879 2.0269 0.4186<br>H -4.4011 1.6550 1.0183<br>H -5.4474 -0.5890 0.7630<br>H -4.0763 -2.4695 -0.1288<br>H -1.7322 -2.1135 -0.7508<br>H 0.8731 3.4449 -0.5850<br>H -0.0636 2.7499 0.7356<br>H -0.8124 3.0178 -0.8499 | C -1.5455 -1.0260 1.3164<br>C -1.5421 -1.5218 -0.0923<br>C -2.5138 0.1065 1.3132<br>O -0.3456 -1.0060 -0.7927<br>C -2.8728 -0.9281 -0.6755<br>C -2.5628 0.5032 -1.1290<br>C -3.6900 -0.6196 0.6016<br>C -2.0207 1.1307 0.1934<br>C 0.2927 0.0771 -0.2345<br>C -0.4865 1.3317 0.1433<br>C 1.7050 -0.0498 -0.0868<br>C 2.3793 -1.2236 -0.5296<br>C 3.7481 -1.3659 -0.3756<br>C 4.5116 -0.3597 0.2271<br>C 3.8710 0.7983 0.6774<br>C 2.5021 0.9589 0.5249<br>C -0.1534 2.5138 -0.8019<br>H -0.7784 -1.2458 2.0466<br>H -1.4654 -2.6034 -0.2138<br>H -2.7216 0.5728 2.2756<br>H -3.3489 -1.5605 -1.4249<br>H -3.4773 0.9974 -1.4664<br>H -1.8420 0.5438 -1.9435<br>H -4.5517 0.0217 0.3938<br>H -4.0263 -1.4998 1.1538<br>H -2.4759 2.1065 0.3824<br>H -0.1612 1.6258 1.1512<br>H 1.7991 -2.0078 -0.9966<br>H 4.2316 -2.2712 -0.7275<br>H 5.5824 -0.4771 0.3457<br>H 4.4475 1.5828 1.1562<br>H 2.0402 1.8634 0.8989<br>H -0.6350 3.4300 -0.4447<br>H -0.5075 2.3193 -1.8169<br>H 0.9202 2.6948 -0.8599 |                                                                           |

**Table S7.** Effect of the Me group in the tether on relative stability of the diradicals in the bicyclo[2.2.1]heptane parent system (continued – Me is “out”)

| Gamma 1,4-diradical (triplet)<br>Me is “out”<br>B3LYP/6-311+G(d,p)<br>-695.839769097 Hartrees                                                                                                                                                                                                                                                                                                                                                                                                                                                                                                                                                                                                                                                                                                                                                                                                                                                                                           | Delta 1,4-diradical (triplet)<br>Me is “out”<br>B3LYP/6-311+G(d,p)<br>-695.820436164 Hartrees                                                                                                                                                                                                                                                                                                                                                                                                                                                                                                                                                                                                                                                                                                                                                                                                                                                                                                 | $\Delta E = 12.1$ kcal/mol<br>(triplet gamma diradical is lower in energy) |
|-----------------------------------------------------------------------------------------------------------------------------------------------------------------------------------------------------------------------------------------------------------------------------------------------------------------------------------------------------------------------------------------------------------------------------------------------------------------------------------------------------------------------------------------------------------------------------------------------------------------------------------------------------------------------------------------------------------------------------------------------------------------------------------------------------------------------------------------------------------------------------------------------------------------------------------------------------------------------------------------|-----------------------------------------------------------------------------------------------------------------------------------------------------------------------------------------------------------------------------------------------------------------------------------------------------------------------------------------------------------------------------------------------------------------------------------------------------------------------------------------------------------------------------------------------------------------------------------------------------------------------------------------------------------------------------------------------------------------------------------------------------------------------------------------------------------------------------------------------------------------------------------------------------------------------------------------------------------------------------------------------|----------------------------------------------------------------------------|
| 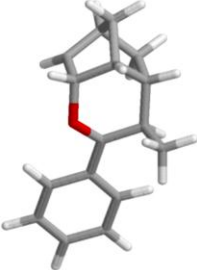                                                                                                                                                                                                                                                                                                                                                                                                                                                                                                                                                                                                                                                                                                                                                                                                                                                                                                       |                                                                                                                                                                                                                                                                                                                                                                                                                                                                                                                                                                                                                                                                                                                                                                                                                                                                                                              |                                                                            |
| C 1.6403 -1.0441 -0.9358<br>C 1.8595 -1.7880 0.3534<br>C 2.5717 0.1782 -0.7567<br>O 0.2512 -0.7104 -1.1868<br>C 2.8606 -1.0165 1.1555<br>C 2.1404 0.2827 1.6420<br>C 3.7486 -0.4428 0.0199<br>C 1.9159 1.0875 0.3169<br>C -0.3453 0.1935 -0.3483<br>C 0.4427 1.4265 0.0080<br>C -1.7298 -0.0059 -0.0957<br>C -2.5147 0.9445 0.6168<br>C -3.8605 0.7223 0.8620<br>C -4.4890 -0.4423 0.4093<br>C -3.7387 -1.3863 -0.3011<br>C -2.3929 -1.1805 -0.5538<br>C 0.3311 2.4905 -1.1113<br>H 1.9111 -1.6310 -1.8200<br>H 1.2087 -2.5731 0.7159<br>H 2.8161 0.6834 -1.6909<br>H 3.3630 -1.5698 1.9493<br>H 2.7807 0.8355 2.3365<br>H 1.2031 0.0589 2.1562<br>H 4.4653 0.3066 0.3681<br>H 4.2837 -1.2149 -0.5390<br>H 2.4714 2.0287 0.3666<br>H 0.0137 1.8568 0.9175<br>H -2.0626 1.8605 0.9765<br>H -4.4306 1.4653 1.4097<br>H -5.5420 -0.6091 0.6037<br>H -4.2148 -2.2925 -0.6607<br>H -1.8227 -1.9154 -1.1058<br>H 0.8910 3.3922 -0.8423<br>H 0.7267 2.1130 -2.0574<br>H -0.7111 2.7720 -1.2771 | C 2.1174 -0.2893 -1.4378<br>C 1.6829 -1.3915 -0.5303<br>C 2.8993 0.6335 -0.5693<br>O 0.2711 -1.2591 -0.1884<br>C 2.6366 -1.2263 0.7086<br>C 2.0404 -0.1439 1.6186<br>C 3.8149 -0.4251 0.1076<br>C 1.9259 1.0510 0.6262<br>C -0.3252 -0.0291 -0.0426<br>C 0.4502 1.2610 0.2139<br>C -1.7507 -0.0919 0.0087<br>C -2.4411 -1.3018 -0.2901<br>C -3.8232 -1.3714 -0.2392<br>C -4.5879 -0.2537 0.1130<br>C -3.9328 0.9422 0.4194<br>C -2.5496 1.0295 0.3707<br>C 0.3072 2.3064 -0.9156<br>H 1.7061 -0.1074 -2.4208<br>H 1.7367 -2.3923 -0.9628<br>H 3.3883 1.4733 -1.0602<br>H 2.8788 -2.1671 1.2027<br>H 2.7277 0.0706 2.4407<br>H 1.0787 -0.4171 2.0537<br>H 4.4724 -0.0181 0.8813<br>H 4.4184 -0.9735 -0.6192<br>H 2.2861 1.9828 1.0707<br>H -0.0256 1.7036 1.1006<br>H -1.8646 -2.1750 -0.5626<br>H -4.3163 -2.3083 -0.4768<br>H -5.6693 -0.3143 0.1506<br>H -4.5090 1.8166 0.7035<br>H -2.0826 1.9713 0.6277<br>H 0.7711 3.2504 -0.6110<br>H -0.7405 2.5042 -1.1455<br>H 0.7890 1.9756 -1.8368 |                                                                            |

**Table S8.** Effect of the Me group in the tether on relative stability of the diradicals in the bicyclo[2.2.2]octane parent system (Me is "in")

| Gamma 1,4-diradical (triplet)<br>Me is "in"<br>B3LYP/6-311+G(d,p)<br>-735.163731453 Hartrees                                                                                                                                                                                                                                                                                                                                                                                                                                                                                                                                                                                                                                                                                                                                                                                                                                                                                                                                                                                    | Delta 1,4-diradical (triplet)<br>Me is "in"<br>B3LYP/6-311+G(d,p)<br>-735.159317186 Hartrees                                                                                                                                                                                                                                                                                                                                                                                                                                                                                                                                                                                                                                                                                                                                                                                                                                                                                                                                                                                           | $\Delta E = 2.8$ kcal/mol<br>(triplet gamma diradical is lower in energy) |
|---------------------------------------------------------------------------------------------------------------------------------------------------------------------------------------------------------------------------------------------------------------------------------------------------------------------------------------------------------------------------------------------------------------------------------------------------------------------------------------------------------------------------------------------------------------------------------------------------------------------------------------------------------------------------------------------------------------------------------------------------------------------------------------------------------------------------------------------------------------------------------------------------------------------------------------------------------------------------------------------------------------------------------------------------------------------------------|----------------------------------------------------------------------------------------------------------------------------------------------------------------------------------------------------------------------------------------------------------------------------------------------------------------------------------------------------------------------------------------------------------------------------------------------------------------------------------------------------------------------------------------------------------------------------------------------------------------------------------------------------------------------------------------------------------------------------------------------------------------------------------------------------------------------------------------------------------------------------------------------------------------------------------------------------------------------------------------------------------------------------------------------------------------------------------------|---------------------------------------------------------------------------|
| 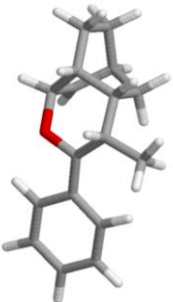                                                                                                                                                                                                                                                                                                                                                                                                                                                                                                                                                                                                                                                                                                                                                                                                                                                                                                                                                                                               |                                                                                                                                                                                                                                                                                                                                                                                                                                                                                                                                                                                                                                                                                                                                                                                                                                                                                                                                                                                                       |                                                                           |
| C 1.4021 -1.2435 -0.7253<br>C 1.5011 -1.5209 0.7402<br>C 2.3135 -0.0549 -1.0430<br>O 0.0232 -0.9632 -1.1306<br>C 2.3514 -0.5576 1.5077<br>C 1.8046 0.8756 1.2537<br>C 3.7958 -0.6170 0.9478<br>C 1.7224 1.1487 -0.2813<br>C -0.5737 0.1639 -0.6069<br>C 0.2709 1.4138 -0.7807<br>C -1.9413 -0.0251 -0.2333<br>C -2.7899 0.9884 0.2979<br>C -4.1032 0.7195 0.6534<br>C -4.6473 -0.5579 0.4991<br>C -3.8377 -1.5722 -0.0214<br>C -2.5236 -1.3215 -0.3772<br>C 3.7525 -0.3585 -0.5854<br>C -0.2435 2.7545 -0.2423<br>H 1.6529 -2.1190 -1.3337<br>H 0.8956 -2.2903 1.2036<br>H 2.2945 0.1420 -2.1190<br>H 2.3462 -0.7792 2.5772<br>H 2.4610 1.6019 1.7440<br>H 0.8182 0.9727 1.7148<br>H 4.4101 0.1341 1.4548<br>H 4.2389 -1.5916 1.1661<br>H 2.3122 2.0383 -0.5275<br>H 0.3613 1.5373 -1.8737<br>H -2.4198 1.9879 0.4523<br>H -4.7121 1.5199 1.0605<br>H -5.6751 -0.7580 0.7786<br>H -4.2398 -2.5716 -0.1514<br>H -1.9154 -2.1178 -0.7813<br>H 4.3977 0.4823 -0.8573<br>H 4.1312 -1.2270 -1.1338<br>H 0.5072 3.5227 -0.4506<br>H -1.1670 3.0650 -0.7319<br>H -0.4087 2.7427 0.8372 | C -1.3936 -0.9499 1.2147<br>C -1.3420 -1.4301 -0.1902<br>C -2.1549 0.3292 1.3314<br>O -0.0890 -0.9590 -0.8417<br>C -2.5688 -0.8643 -0.9414<br>C -2.3242 0.6362 -1.1744<br>C -3.8069 -1.0073 -0.0295<br>C -1.7194 1.2341 0.1266<br>C 0.5673 0.1014 -0.2692<br>C -0.1773 1.3913 0.0400<br>C 1.9688 -0.0686 -0.0752<br>C 2.6137 -1.2799 -0.4570<br>C 3.9718 -1.4632 -0.2586<br>C 4.7536 -0.4620 0.3289<br>C 4.1422 0.7338 0.7173<br>C 2.7846 0.9352 0.5203<br>C 0.1925 2.5142 -0.9616<br>C -3.6629 -0.0249 1.1669<br>H -0.8010 -1.3941 2.0042<br>H -1.2788 -2.5172 -0.2743<br>H -1.9753 0.8408 2.2796<br>H -2.7115 -1.3936 -1.8863<br>H -3.2697 1.1252 -1.4266<br>H -1.6572 0.7892 -2.0222<br>H -4.7154 -0.7949 -0.5999<br>H -3.8931 -2.0380 0.3299<br>H -2.1303 2.2352 0.2935<br>H 0.1588 1.7283 1.0305<br>H 2.0191 -2.0600 -0.9126<br>H 4.4326 -2.3969 -0.5637<br>H 5.8160 -0.6113 0.4823<br>H 4.7331 1.5162 1.1818<br>H 2.3454 1.8704 0.8433<br>H -0.2833 3.4560 -0.6686<br>H 1.2704 2.6757 -0.9986<br>H -0.1339 2.2707 -1.9750<br>H -4.2364 0.8926 0.9962<br>H -4.0451 -0.4736 2.0865 |                                                                           |

**Table S9.** Effect of the Me group in the tether on relative stability of the diradicals in the bicyclo[2.2.2]octane parent system (continued Me is "out")

| Gamma 1,4-diradical (triplet)<br>Me is "out"<br>B3LYP/6-311+G(d,p)<br>-735.172668724 Hartrees                                                                                                                                                                                                                                                                                                                                                                                                                                                                                                                                                                                                                                                                                                                                                                                                                                                                                                                                                                               | Delta 1,4-diradical (triplet)<br>Me is "out"<br>B3LYP/6-311+G(d,p)<br>-735.160209632 Hartrees                                                                                                                                                                                                                                                                                                                                                                                                                                                                                                                                                                                                                                                                                                                                                                                                                                                                                                                                                                                 | $\Delta E = 7.8$ kcal/mol<br>(triplet gamma diradical is lower in energy) |
|-----------------------------------------------------------------------------------------------------------------------------------------------------------------------------------------------------------------------------------------------------------------------------------------------------------------------------------------------------------------------------------------------------------------------------------------------------------------------------------------------------------------------------------------------------------------------------------------------------------------------------------------------------------------------------------------------------------------------------------------------------------------------------------------------------------------------------------------------------------------------------------------------------------------------------------------------------------------------------------------------------------------------------------------------------------------------------|-------------------------------------------------------------------------------------------------------------------------------------------------------------------------------------------------------------------------------------------------------------------------------------------------------------------------------------------------------------------------------------------------------------------------------------------------------------------------------------------------------------------------------------------------------------------------------------------------------------------------------------------------------------------------------------------------------------------------------------------------------------------------------------------------------------------------------------------------------------------------------------------------------------------------------------------------------------------------------------------------------------------------------------------------------------------------------|---------------------------------------------------------------------------|
| 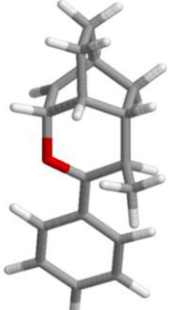                                                                                                                                                                                                                                                                                                                                                                                                                                                                                                                                                                                                                                                                                                                                                                                                                                                                                                                                                                                           |                                                                                                                                                                                                                                                                                                                                                                                                                                                                                                                                                                                                                                                                                                                                                                                                                                                                                                                                                                                              |                                                                           |
| C 1.4275 -0.8843 -1.0292<br>C 1.6373 -1.7233 0.1893<br>C 2.2410 0.4044 -0.8647<br>O 0.0077 -0.5928 -1.2434<br>C 2.4945 -1.0998 1.2451<br>C 1.8650 0.2665 1.6315<br>C 3.8946 -0.8162 0.6417<br>C 1.6468 1.1416 0.3566<br>C -0.6054 0.2336 -0.3392<br>C 0.1489 1.4591 0.1157<br>C -1.9836 -0.0200 -0.0972<br>C -2.7868 0.8487 0.6947<br>C -4.1258 0.5748 0.9256<br>C -4.7296 -0.5626 0.3799<br>C -3.9607 -1.4266 -0.4083<br>C -2.6213 -1.1689 -0.6472<br>C 3.7247 0.0557 -0.6354<br>C -0.0458 2.6318 -0.8756<br>H 1.6980 -1.4134 -1.9493<br>H 1.1190 -2.6664 0.3122<br>H 2.1424 1.0149 -1.7652<br>H 2.5799 -1.7405 2.1256<br>H 2.5252 0.7772 2.3403<br>H 0.9131 0.0982 2.1425<br>H 4.5112 -0.3039 1.3873<br>H 4.3958 -1.7582 0.4061<br>H 2.1710 2.0951 0.4788<br>H -0.2660 1.7755 1.0774<br>H -2.3544 1.7415 1.1293<br>H -4.7098 1.2558 1.5357<br>H -5.7774 -0.7700 0.5631<br>H -4.4172 -2.3113 -0.8398<br>H -2.0370 -1.8429 -1.2589<br>H 4.2980 0.9839 -0.5528<br>H 4.1132 -0.4685 -1.5144<br>H 0.4971 3.5186 -0.5322<br>H 0.3116 2.3780 -1.8759<br>H -1.1030 2.8919 -0.9619 | C 1.9995 -0.1284 -1.4362<br>C 1.4598 -1.2749 -0.6574<br>C 2.6192 0.9004 -0.5543<br>O 0.0111 -1.1631 -0.4777<br>C 2.2006 -1.3378 0.7027<br>C 1.7472 -0.1522 1.5751<br>C 3.7091 -1.1551 0.4232<br>C 1.6366 1.0896 0.6547<br>C -0.5967 0.0079 -0.1048<br>C 0.1583 1.2892 0.2210<br>C -2.0174 -0.0916 -0.0118<br>C -2.6934 -1.2905 -0.3823<br>C -4.0713 -1.3961 -0.2907<br>C -4.8469 -0.3271 0.1717<br>C -4.2064 0.8581 0.5444<br>C -2.8280 0.9814 0.4568<br>C 0.0019 2.3708 -0.8725<br>C 3.9587 0.3128 -0.0212<br>H 1.8226 -0.0190 -2.4988<br>H 1.5535 -2.2235 -1.1911<br>H 2.7921 1.8476 -1.0670<br>H 2.0008 -2.2935 1.1921<br>H 2.4749 0.0066 2.3763<br>H 0.7884 -0.3541 2.0577<br>H 4.2847 -1.3939 1.3218<br>H 4.0350 -1.8523 -0.3557<br>H 1.9388 1.9908 1.1989<br>H -0.3364 1.6846 1.1176<br>H -2.1098 -2.1265 -0.7423<br>H -4.5525 -2.3234 -0.5838<br>H -5.9248 -0.4158 0.2399<br>H -4.7907 1.6964 0.9093<br>H -2.3742 1.9160 0.7604<br>H 0.4946 3.2989 -0.5629<br>H 0.4389 2.0522 -1.8207<br>H -1.0505 2.5923 -1.0555<br>H 4.3168 0.9231 0.8148<br>H 4.7239 0.3587 -0.7994 |                                                                           |

**Table S10.** Effect of the Me group in the tether on relative stability of the diradicals in the bicyclo[2.2.1]heptane system with vicinal endo COOMe (Me is "in")

| Gamma 1,4-diradical (triplet)<br>Me is "in"<br>B3LYP/6-311+G(d,p)<br>-923.762636835 Hartrees                                                                                                                                                                                                                                                                                                                                                                                                                                                                                                                                                                                                                                                                                                                                                                                                                                                                                                                                                                                                                                                                     | Delta 1,4-diradical (triplet)<br>Me is "in"<br>B3LYP/6-311+G(d,p)<br>-923.747077507 Hartrees                                                                                                                                                                                                                                                                                                                                                                                                                                                                                                                                                                                                                                                                                                                                                                                                                                                                                                                                                                                                                                                                             | $\Delta E = 9.8$ kcal/mol<br>(triplet gamma diradical is lower in energy) |
|------------------------------------------------------------------------------------------------------------------------------------------------------------------------------------------------------------------------------------------------------------------------------------------------------------------------------------------------------------------------------------------------------------------------------------------------------------------------------------------------------------------------------------------------------------------------------------------------------------------------------------------------------------------------------------------------------------------------------------------------------------------------------------------------------------------------------------------------------------------------------------------------------------------------------------------------------------------------------------------------------------------------------------------------------------------------------------------------------------------------------------------------------------------|--------------------------------------------------------------------------------------------------------------------------------------------------------------------------------------------------------------------------------------------------------------------------------------------------------------------------------------------------------------------------------------------------------------------------------------------------------------------------------------------------------------------------------------------------------------------------------------------------------------------------------------------------------------------------------------------------------------------------------------------------------------------------------------------------------------------------------------------------------------------------------------------------------------------------------------------------------------------------------------------------------------------------------------------------------------------------------------------------------------------------------------------------------------------------|---------------------------------------------------------------------------|
| 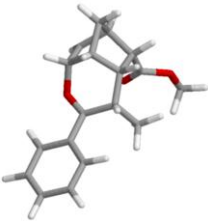                                                                                                                                                                                                                                                                                                                                                                                                                                                                                                                                                                                                                                                                                                                                                                                                                                                                                                                                                                                                                                                                                |                                                                                                                                                                                                                                                                                                                                                                                                                                                                                                                                                                                                                                                                                                                                                                                                                                                                                                                                                                                                                                                                                         |                                                                           |
| C 0.3958 -2.0774 0.4847<br>C 1.6800 -1.8452 1.2229<br>C 0.8516 -2.0083 -0.9931<br>O -0.6178 -1.1020 0.8554<br>C 2.7425 -1.6185 0.1983<br>C 2.4727 -0.2418 -0.5148<br>C 2.2707 -2.5954 -0.9095<br>C 1.1121 -0.5164 -1.3080<br>C -1.1187 -0.2653 -0.0962<br>C -0.1895 0.3163 -1.1349<br>C -2.5039 0.0432 0.0137<br>C -3.2820 -0.4734 1.0894<br>C -4.6335 -0.1918 1.1950<br>C -5.2790 0.6061 0.2431<br>C -4.5372 1.1173 -0.8260<br>C -3.1817 0.8509 -0.9432<br>C 0.0413 1.8355 -0.9576<br>C 2.5853 0.9312 0.4346<br>O 2.1491 0.9962 1.5582<br>O 3.3125 1.9279 -0.1268<br>C 3.5101 3.0983 0.6879<br>H -0.0602 -3.0482 0.7179<br>H 1.7345 -1.6086 2.2745<br>H 0.1629 -2.4849 -1.6919<br>H 3.7710 -1.7193 0.5453<br>H 3.2484 -0.0911 -1.2676<br>H 2.8244 -2.4971 -1.8476<br>H 2.2963 -3.6385 -0.5870<br>H 1.3817 -0.4251 -2.3623<br>H -0.7020 0.2007 -2.0999<br>H -2.7943 -1.0906 1.8317<br>H -5.1968 -0.5970 2.0291<br>H -6.3372 0.8225 0.3314<br>H -5.0248 1.7287 -1.5781<br>H -2.6455 1.2531 -1.7934<br>H 0.7810 2.1999 -1.6770<br>H 0.3802 2.0718 0.0505<br>H -0.8856 2.3860 -1.1202<br>H 4.1230 3.7688 0.0895<br>H 4.0191 2.8360 1.6163<br>H 2.5524 3.5640 0.9256 | C -0.5178 -2.5361 -0.1012<br>C -0.8297 -1.5826 -1.2083<br>C -1.5777 -2.2775 0.9182<br>O 0.0438 -0.3932 -1.0962<br>C -2.3345 -1.2285 -0.9414<br>C -2.3589 -0.0911 0.0902<br>C -2.8007 -2.3864 -0.0305<br>C -1.4941 -0.7136 1.2605<br>C 0.7315 -0.2197 0.0810<br>C -0.0167 -0.2608 1.4053<br>C 2.1417 -0.0382 -0.0484<br>C 2.7349 0.0985 -1.3352<br>C 4.1026 0.2608 -1.4804<br>C 4.9453 0.2836 -0.3636<br>C 4.3877 0.1338 0.9090<br>C 3.0187 -0.0207 1.0716<br>C 0.1059 1.0435 2.2312<br>C -2.1576 1.2865 -0.5175<br>O -2.1576 1.5208 -1.6999<br>O -2.1502 2.2629 0.4195<br>C -2.0961 3.6128 -0.0825<br>H 0.4267 -3.0457 0.0308<br>H -0.6496 -1.9493 -2.2193<br>H -1.5678 -2.9113 1.8043<br>H -2.9122 -1.0315 -1.8413<br>H -3.3831 -0.0214 0.4774<br>H -3.7657 -2.1836 0.4429<br>H -2.8485 -3.3589 -0.5242<br>H -1.9886 -0.5287 2.2162<br>H 0.4622 -1.0429 2.0158<br>H 2.0920 0.0831 -2.2048<br>H 4.5223 0.3709 -2.4748<br>H 6.0151 0.4093 -0.4834<br>H 5.0300 0.1308 1.7833<br>H 2.6271 -0.1586 2.0709<br>H -0.3334 0.8898 3.2225<br>H -0.4169 1.8693 1.7570<br>H 1.1473 1.3330 2.3684<br>H -2.0946 4.2504 0.7991<br>H -2.9661 3.8212 -0.7065<br>H -1.1898 3.7650 -0.6697 |                                                                           |

**Table S11.** Effect of the Me group in the tether on relative stability of the diradicals in the bicyclo[2.2.1]octane system with vicinal endo COOMe (continued - Me is "out")

| Gamma 1,4-diradical (triplet)<br>Me is "out"<br>B3LYP/6-311+G(d,p)<br>-923.777367273 Hartrees                                                                                                                                                                                                                                                                                                                                                                                                                                                                                                                                                                                                                                                                                                                                                                                                                                                                                                                                                                                                                                                                            | Delta 1,4-diradical (triplet)<br>Me is "out"<br>B3LYP/6-311+G(d,p)<br>-923.755809161 Hartrees                                                                                                                                                                                                                                                                                                                                                                                                                                                                                                                                                                                                                                                                                                                                                                                                                                                                                                                                                                                                                                                                               | $\Delta E = 13.5$ kcal/mol<br>(triplet gamma diradical is lower in energy) |
|--------------------------------------------------------------------------------------------------------------------------------------------------------------------------------------------------------------------------------------------------------------------------------------------------------------------------------------------------------------------------------------------------------------------------------------------------------------------------------------------------------------------------------------------------------------------------------------------------------------------------------------------------------------------------------------------------------------------------------------------------------------------------------------------------------------------------------------------------------------------------------------------------------------------------------------------------------------------------------------------------------------------------------------------------------------------------------------------------------------------------------------------------------------------------|-----------------------------------------------------------------------------------------------------------------------------------------------------------------------------------------------------------------------------------------------------------------------------------------------------------------------------------------------------------------------------------------------------------------------------------------------------------------------------------------------------------------------------------------------------------------------------------------------------------------------------------------------------------------------------------------------------------------------------------------------------------------------------------------------------------------------------------------------------------------------------------------------------------------------------------------------------------------------------------------------------------------------------------------------------------------------------------------------------------------------------------------------------------------------------|----------------------------------------------------------------------------|
| 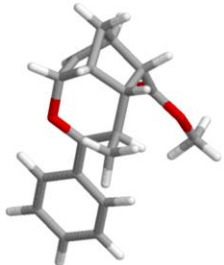                                                                                                                                                                                                                                                                                                                                                                                                                                                                                                                                                                                                                                                                                                                                                                                                                                                                                                                                                                                                                                                                                        |                                                                                                                                                                                                                                                                                                                                                                                                                                                                                                                                                                                                                                                                                                                                                                                                                                                                                                                                                                                                                                                                                            |                                                                            |
| C -1.4628 -1.8855 -0.7056<br>C -1.7855 -0.8120 -1.7058<br>C -2.3839 -1.4995 0.4764<br>O -0.0551 -1.9693 -0.3745<br>C -2.8514 0.0558 -1.1123<br>C -2.2084 0.8972 0.0350<br>C -3.6294 -0.9873 -0.2687<br>C -1.7952 -0.2042 1.1022<br>C 0.4970 -0.9206 0.3102<br>C -0.2990 -0.3505 1.4538<br>C 1.8684 -0.6531 0.0458<br>C 2.5510 -1.3212 -1.0102<br>C 3.8833 -1.0570 -1.2796<br>C 4.5998 -0.1265 -0.5186<br>C 3.9517 0.5356 0.5289<br>C 2.6187 0.2821 0.8127<br>C -0.1244 -1.2208 2.7247<br>C -1.1711 1.8896 -0.4516<br>O -0.8679 2.0825 -1.6034<br>O -0.6708 2.6196 0.5730<br>C 0.2897 3.6336 0.2123<br>H -1.6854 -2.8941 -1.0709<br>H -1.1847 -0.5847 -2.5741<br>H -2.5410 -2.3051 1.1930<br>H -3.4207 0.6563 -1.8203<br>H -2.9897 1.5145 0.4939<br>H -4.3725 -0.5417 0.3990<br>H -4.1145 -1.7512 -0.8808<br>H -2.3262 0.0162 2.0315<br>H 0.0827 0.6437 1.6845<br>H 2.0074 -2.0424 -1.6054<br>H 4.3748 -1.5798 -2.0933<br>H 5.6423 0.0757 -0.7349<br>H 4.4967 1.2538 1.1326<br>H 2.1516 0.8058 1.6377<br>H 0.9277 -1.2687 3.0133<br>H -0.4691 -2.2444 2.5608<br>H -0.6895 -0.7980 3.5617<br>H 0.5588 4.1225 1.1462<br>H -0.1548 4.3482 -0.4813<br>H 1.1657 3.1775 -0.2502 | C -2.0255 -2.0653 -0.4935<br>C -1.6329 -0.9903 -1.4515<br>C -2.8062 -1.3635 0.5628<br>O -0.2288 -0.6454 -1.2901<br>C -2.6228 0.1803 -1.0934<br>C -2.0700 0.9462 0.1198<br>C -3.7647 -0.5789 -0.3776<br>C -1.8461 -0.2202 1.1421<br>C 0.3903 -0.6796 -0.0647<br>C -0.3644 -0.6475 1.2588<br>C 1.8136 -0.5942 -0.1442<br>C 2.4791 -0.6591 -1.4020<br>C 3.8586 -0.5754 -1.4887<br>C 4.6439 -0.4191 -0.3411<br>C 4.0125 -0.3426 0.9035<br>C 2.6319 -0.4259 1.0082<br>C -0.2087 -1.9351 2.1015<br>C -0.9788 1.9590 -0.1773<br>O -0.7714 2.4427 -1.2620<br>O -0.3473 2.3626 0.9484<br>C 0.6613 3.3785 0.7725<br>H -1.6027 -3.0596 -0.4775<br>H -1.6994 -1.2637 -2.5058<br>H -3.2613 -1.9849 1.3322<br>H -2.8861 0.8089 -1.9409<br>H -2.8810 1.5770 0.5047<br>H -4.4565 0.0944 0.1363<br>H -4.3381 -1.2468 -1.0233<br>H -2.1874 0.0675 2.1391<br>H 0.1139 0.1505 1.8363<br>H 1.8858 -0.7730 -2.2986<br>H 4.3329 -0.6314 -2.4629<br>H 5.7232 -0.3565 -0.4156<br>H 4.6055 -0.2137 1.8030<br>H 2.1829 -0.3506 1.9902<br>H -0.6694 -1.7953 3.0853<br>H -0.6775 -2.7983 1.6277<br>H 0.8437 -2.1768 2.2554<br>H 1.0420 3.5844 1.7705<br>H 0.2246 4.2761 0.3332<br>H 1.4584 3.0085 0.1272 |                                                                            |



**Table S12.** Effect of the Me group in the tether on relative stability of the diradicals in the bicyclo[2.2.2]octane system with vicinal endo COOMe (Me is "in")

| Gamma 1,4-diradical (triplet)<br>Me is "in"<br>B3LYP/6-311+G(d,p)<br>-963.094593638 Hartrees                                                                                                                                                                                                                                                                                                                                                                                                                                                                                                                                                                                                                                                                                                                                                                                                                                                                                                                                                                                                                                                                                                                                                                    | Delta 1,4-diradical (triplet)<br>Me is "in"<br>B3LYP/6-311+G(d,p)<br>-963.084556125 Hartrees                                                                                                                                                                                                                                                                                                                                                                                                                                                                                                                                                                                                                                                                                                                                                                                                                                                                                                                                                                                                                                                                                                                                                             | $\Delta E = 6.3$ kcal/mol<br>(triplet gamma diradical is lower in energy) |
|-----------------------------------------------------------------------------------------------------------------------------------------------------------------------------------------------------------------------------------------------------------------------------------------------------------------------------------------------------------------------------------------------------------------------------------------------------------------------------------------------------------------------------------------------------------------------------------------------------------------------------------------------------------------------------------------------------------------------------------------------------------------------------------------------------------------------------------------------------------------------------------------------------------------------------------------------------------------------------------------------------------------------------------------------------------------------------------------------------------------------------------------------------------------------------------------------------------------------------------------------------------------|----------------------------------------------------------------------------------------------------------------------------------------------------------------------------------------------------------------------------------------------------------------------------------------------------------------------------------------------------------------------------------------------------------------------------------------------------------------------------------------------------------------------------------------------------------------------------------------------------------------------------------------------------------------------------------------------------------------------------------------------------------------------------------------------------------------------------------------------------------------------------------------------------------------------------------------------------------------------------------------------------------------------------------------------------------------------------------------------------------------------------------------------------------------------------------------------------------------------------------------------------------|---------------------------------------------------------------------------|
| 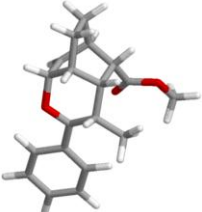                                                                                                                                                                                                                                                                                                                                                                                                                                                                                                                                                                                                                                                                                                                                                                                                                                                                                                                                                                                                                                                                                                                                                                               |                                                                                                                                                                                                                                                                                                                                                                                                                                                                                                                                                                                                                                                                                                                                                                                                                                                                                                                                                                                                                                                                                                                                                                         |                                                                           |
| C -1.0116 -2.1500 -0.2041<br>C -1.2790 -1.3302 -1.4234<br>C -1.9551 -1.6664 0.9043<br>O 0.3783 -2.0550 0.2159<br>C -2.3825 -0.3346 -1.2786<br>C -2.0597 0.6472 -0.0997<br>C -3.6745 -1.0897 -0.8762<br>C -1.5838 -0.1869 1.1579<br>C 0.8341 -0.8102 0.5980<br>C -0.0839 -0.1335 1.5984<br>C 2.1935 -0.5581 0.2314<br>C 2.9150 -1.5643 -0.4777<br>C 4.2308 -1.3770 -0.8664<br>C 4.9008 -0.1838 -0.5812<br>C 4.2141 0.8224 0.1023<br>C 2.8975 0.6485 0.5013<br>C 0.3067 1.2308 2.1826<br>C -1.1435 1.7567 -0.5765<br>O -0.2162 1.6395 -1.3385<br>O -1.5364 2.9558 -0.0757<br>C -0.7638 4.0960 -0.4939<br>H -1.1332 -3.2244 -0.3862<br>H -0.6208 -1.3720 -2.2808<br>H -1.7704 -2.2430 1.8150<br>H -2.5374 0.2291 -2.2000<br>H -2.9924 1.1391 0.1857<br>H -3.9410 -1.7934 -1.6683<br>H -2.1565 0.1758 2.0171<br>H -0.0710 -0.8201 2.4640<br>H 2.4158 -2.4947 -0.7066<br>H 4.7435 -2.1708 -1.3998<br>H 5.9298 -0.0393 -0.8892<br>H 4.7107 1.7620 0.3209<br>H 2.4084 1.4677 1.0008<br>H -0.4691 1.5467 2.8859<br>H 0.4084 2.0161 1.4353<br>H 1.2434 1.1651 2.7374<br>H -1.2277 4.9543 -0.0126<br>H -0.7938 4.1996 -1.5793<br>H 0.2754 3.9940 -0.1765<br>C -3.4213 -1.8318 0.4657<br>H -4.5043 -0.3820 -0.7852<br>H -3.6536 -2.8966 0.3691<br>H -4.0735 -1.4457 1.2551 | C -2.4249 -1.8358 0.5331<br>C -1.6333 -1.5971 -0.7071<br>C -2.9155 -0.5562 1.1282<br>O -0.1872 -1.6455 -0.4663<br>C -2.0908 -0.2448 -1.3117<br>C -1.6062 0.9180 -0.4178<br>C -3.6360 -0.2120 -1.2589<br>C -1.6959 0.4371 1.0578<br>C 0.4516 -0.8150 0.4268<br>C -0.3974 -0.2932 1.5781<br>C 1.8710 -0.7846 0.2133<br>C 2.4344 -1.5900 -0.8215<br>C 3.7938 -1.5895 -1.0849<br>C 4.6703 -0.7919 -0.3440<br>C 4.1450 0.0131 0.6690<br>C 2.7851 0.0247 0.9447<br>C 0.2688 0.5283 2.6920<br>C -0.3215 1.5716 -0.9052<br>O 0.1231 1.4691 -2.0223<br>O 0.1859 2.4229 0.0160<br>C 1.3240 3.1987 -0.4126<br>H -2.5372 -2.8174 0.9754<br>H -1.7629 -2.3985 -1.4373<br>H -3.2430 -0.6710 2.1641<br>H -1.7112 -0.1350 -2.3266<br>H -2.3289 1.7374 -0.5307<br>H -4.0460 -1.1305 -1.6903<br>H -1.8912 1.2948 1.7050<br>H -0.7501 -1.2042 2.0829<br>H 1.7773 -2.2136 -1.4094<br>H 4.1777 -2.2193 -1.8806<br>H 5.7337 -0.7946 -0.5532<br>H 4.8046 0.6477 1.2519<br>H 2.4351 0.6823 1.7216<br>H -0.4794 0.7084 3.4699<br>H 0.6173 1.4998 2.3421<br>H 1.0948 -0.0103 3.1582<br>H 1.5911 3.8177 0.4417<br>H 1.0567 3.8213 -1.2675<br>H 2.1496 2.5415 -0.6853<br>C -4.0807 -0.0611 0.2253<br>H -4.0105 0.6172 -1.8658<br>H -4.9807 -0.6477 0.4229<br>H -4.3224 0.9800 0.4655 |                                                                           |

**Table S13.** Effect of the Me group in the tether on relative stability of the diradicals in the bicyclo[2.2.2]octane system with vicinal endo COOMe (Me is "out")

| Gamma 1,4-diradical (triplet)<br>Me is "out"<br>B3LYP/6-311+G(d,p)<br>-963.108676349 Hartrees                                                                                                                                                                                                                                                                                                                                                                                                                                                                                                                                                                                                                                                                                                                                                                                                                                                                                                                                                                                                                                                                                                                                                                | Delta 1,4-diradical (triplet)<br>Me is "out"<br>B3LYP/6-311+G(d,p)<br>-963.097120510 Hartrees                                                                                                                                                                                                                                                                                                                                                                                                                                                                                                                                                                                                                                                                                                                                                                                                                                                                                                                                                                                                                                                                                                                                                                  | $\Delta E = 7.3$ kcal/mol<br>(triplet gamma diradical is lower in energy) |
|--------------------------------------------------------------------------------------------------------------------------------------------------------------------------------------------------------------------------------------------------------------------------------------------------------------------------------------------------------------------------------------------------------------------------------------------------------------------------------------------------------------------------------------------------------------------------------------------------------------------------------------------------------------------------------------------------------------------------------------------------------------------------------------------------------------------------------------------------------------------------------------------------------------------------------------------------------------------------------------------------------------------------------------------------------------------------------------------------------------------------------------------------------------------------------------------------------------------------------------------------------------|----------------------------------------------------------------------------------------------------------------------------------------------------------------------------------------------------------------------------------------------------------------------------------------------------------------------------------------------------------------------------------------------------------------------------------------------------------------------------------------------------------------------------------------------------------------------------------------------------------------------------------------------------------------------------------------------------------------------------------------------------------------------------------------------------------------------------------------------------------------------------------------------------------------------------------------------------------------------------------------------------------------------------------------------------------------------------------------------------------------------------------------------------------------------------------------------------------------------------------------------------------------|---------------------------------------------------------------------------|
| 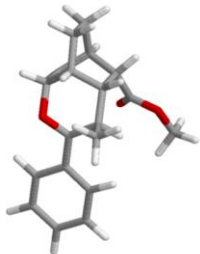                                                                                                                                                                                                                                                                                                                                                                                                                                                                                                                                                                                                                                                                                                                                                                                                                                                                                                                                                                                                                                                                                                                                                                            |                                                                                                                                                                                                                                                                                                                                                                                                                                                                                                                                                                                                                                                                                                                                                                                                                                                                                                                                                                                                                                                                                                                                                                               |                                                                           |
| C -1.2710 -1.9275 -0.4609<br>C -1.5613 -0.9974 -1.5919<br>C -2.0745 -1.4550 0.7582<br>O 0.1578 -1.9859 -0.1660<br>C -2.5432 0.0856 -1.2798<br>C -2.0151 0.9283 -0.0816<br>C -3.8678 -0.5697 -0.8127<br>C -1.5653 -0.0325 1.0921<br>C 0.7303 -0.8568 0.3552<br>C -0.0434 -0.0868 1.3961<br>C 2.1065 -0.6596 0.0551<br>C 2.7784 -1.5034 -0.8741<br>C 4.1169 -1.3136 -1.1741<br>C 4.8505 -0.2867 -0.5694<br>C 4.2125 0.5510 0.3506<br>C 2.8737 0.3737 0.6630<br>C 0.2108 -0.6672 2.8117<br>C -0.9923 1.9558 -0.5372<br>O -0.4884 2.0196 -1.6305<br>O -0.7486 2.8641 0.4391<br>C 0.1809 3.9139 0.1027<br>H -1.5033 -2.9703 -0.7059<br>H -1.0085 -1.0522 -2.5203<br>H -1.8818 -2.1228 1.6005<br>H -2.7103 0.7315 -2.1417<br>H -2.8508 1.5236 0.3029<br>H -4.2868 -1.1611 -1.6301<br>H -2.0573 0.3145 2.0047<br>H 0.3283 0.9379 1.4124<br>H 2.2213 -2.3005 -1.3474<br>H 4.6000 -1.9716 -1.8888<br>H 5.8978 -0.1435 -0.8086<br>H 4.7698 1.3484 0.8311<br>H 2.4151 1.0358 1.3872<br>H -0.3278 -0.0861 3.5673<br>H 1.2754 -0.6328 3.0513<br>H -0.1078 -1.7089 2.8876<br>H 0.2551 4.5326 0.9944<br>H -0.1944 4.4974 -0.7391<br>H 1.1530 3.4939 -0.1589<br>C -3.5787 -1.4617 0.4277<br>H -4.5999 0.2088 -0.5753<br>H -3.9069 -2.4904 0.2504<br>H -4.1344 -1.1083 1.3016 | C -2.1158 -1.9684 -0.1750<br>C -1.5258 -1.1659 -1.2800<br>C -2.6814 -1.1005 0.8965<br>O -0.0701 -1.0998 -1.1682<br>C -2.1910 0.2353 -1.2750<br>C -1.7383 1.0367 -0.0348<br>C -3.7127 0.0158 -1.1158<br>C -1.6204 0.0335 1.1514<br>C 0.5578 -0.7595 -0.0004<br>C -0.1753 -0.5194 1.3072<br>C 1.9799 -0.6858 -0.1113<br>C 2.6309 -0.9544 -1.3491<br>C 4.0089 -0.8806 -1.4657<br>C 4.8074 -0.5389 -0.3688<br>C 4.1909 -0.2691 0.8563<br>C 2.8123 -0.3393 0.9903<br>C -0.1000 -1.7235 2.2759<br>C -0.5636 1.9682 -0.3039<br>O -0.1786 2.3019 -1.3971<br>O -0.0710 2.4882 0.8438<br>C 1.0003 3.4420 0.6920<br>H -2.0322 -3.0467 -0.1310<br>H -1.6594 -1.6376 -2.2560<br>H -2.8812 -1.6444 1.8205<br>H -1.9456 0.7722 -2.1904<br>H -2.5430 1.7418 0.2109<br>H -4.0629 -0.7192 -1.8472<br>H -1.8757 0.5411 2.0861<br>H 0.3751 0.2907 1.7912<br>H 2.0280 -1.2143 -2.2080<br>H 4.4718 -1.0901 -2.4244<br>H 5.8854 -0.4852 -0.4662<br>H 4.7943 -0.0031 1.7180<br>H 2.3766 -0.1250 1.9579<br>H -0.5908 -1.4813 3.2249<br>H -0.5738 -2.6152 1.8627<br>H 0.9402 -1.9745 2.4908<br>H 1.2489 3.7612 1.7019<br>H 0.6718 4.2902 0.0902<br>H 1.8601 2.9703 0.2155<br>C -3.9926 -0.4792 0.3317<br>H -4.2474 0.9470 -1.3225<br>H -4.7896 -1.2260 0.3403<br>H -4.3219 0.3424 0.9771 |                                                                           |

**Table S14.** Comparison of triplet diradicals in the bicyclo[2.2.1]heptane system with vicinal endo COOMe (no Me substitution in the tether)

| Gamma 1,4-diradical (triplet)<br>B3LYP/6-311+G(d,p)<br>-884.454817803 Hartrees                                                                                                                                                                                                                                                                                                                                                                                                                                                                                                                                                                                                                                                                                                                                                                                                                                                                                                                                                                                                          | Delta 1,4-diradical (triplet)<br>B3LYP/6-311+G(d,p)<br>-884.435941011 Hartrees                                                                                                                                                                                                                                                                                                                                                                                                                                                                                                                                                                                                                                                                                                                                                                                                                                                                                                                                                                                                            | $\Delta E =$ kcal/mol<br>(triplet gamma diradical is lower in energy) |
|-----------------------------------------------------------------------------------------------------------------------------------------------------------------------------------------------------------------------------------------------------------------------------------------------------------------------------------------------------------------------------------------------------------------------------------------------------------------------------------------------------------------------------------------------------------------------------------------------------------------------------------------------------------------------------------------------------------------------------------------------------------------------------------------------------------------------------------------------------------------------------------------------------------------------------------------------------------------------------------------------------------------------------------------------------------------------------------------|-------------------------------------------------------------------------------------------------------------------------------------------------------------------------------------------------------------------------------------------------------------------------------------------------------------------------------------------------------------------------------------------------------------------------------------------------------------------------------------------------------------------------------------------------------------------------------------------------------------------------------------------------------------------------------------------------------------------------------------------------------------------------------------------------------------------------------------------------------------------------------------------------------------------------------------------------------------------------------------------------------------------------------------------------------------------------------------------|-----------------------------------------------------------------------|
| 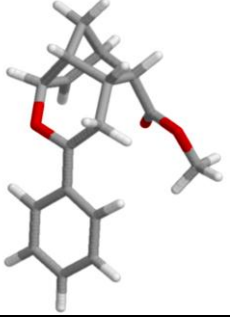                                                                                                                                                                                                                                                                                                                                                                                                                                                                                                                                                                                                                                                                                                                                                                                                                                                                                                                                                                                                       |                                                                                                                                                                                                                                                                                                                                                                                                                                                                                                                                                                                                                                                                                                                                                                                                                                                                                                                                                                                                          |                                                                       |
| C -1.4469 -2.0135 -0.2907<br>C -1.8303 -1.0835 -1.4067<br>C -2.3449 -1.5036 0.8639<br>O -0.0272 -2.0253 -0.0039<br>C -2.9023 -0.1736 -0.8914<br>C -2.2479 0.8206 0.1186<br>C -3.6256 -1.1223 0.1002<br>C -1.7806 -0.1262 1.3028<br>C 0.5216 -0.9047 0.5567<br>C -0.2786 -0.2124 1.6163<br>C 1.8945 -0.6697 0.2708<br>C 2.5755 -1.4370 -0.7160<br>C 3.9099 -1.2058 -1.0049<br>C 4.6298 -0.2132 -0.3304<br>C 3.9835 0.5451 0.6508<br>C 2.6482 0.3264 0.9525<br>H 0.1172 0.7827 1.8096<br>C -1.2379 1.7557 -0.5158<br>O -0.9773 1.8165 -1.6924<br>O -0.7061 2.5972 0.4012<br>C 0.2330 3.5678 -0.1056<br>H -1.6548 -3.0647 -0.5186<br>H -1.2644 -0.9553 -2.3176<br>H -2.4495 -2.2133 1.6854<br>H -3.5091 0.3187 -1.6499<br>H -3.0281 1.4801 0.5166<br>H -4.1060 -1.9684 -0.3965<br>H -2.2887 0.1961 2.2144<br>H -0.1794 -0.7771 2.5590<br>H 2.0290 -2.2072 -1.2434<br>H 4.4004 -1.8039 -1.7657<br>H 5.6739 -0.0375 -0.5613<br>H 4.5318 1.3106 1.1896<br>H 2.1837 0.9219 1.7287<br>H 0.5244 4.1657 0.7554<br>H -0.2391 4.1919 -0.8651<br>H 1.0999 3.0662 -0.5368<br>H -4.3616 -0.6152 0.7309 | C -1.6712 -2.3304 0.0216<br>C -1.4878 -1.3758 -1.1162<br>C -2.5572 -1.6088 0.9788<br>O -0.1639 -0.7635 -1.0659<br>C -2.6573 -0.3465 -0.9052<br>C -2.2143 0.6831 0.1491<br>C -3.6450 -1.1572 -0.0340<br>C -1.7890 -0.2509 1.3316<br>C 0.4839 -0.6262 0.1365<br>C -0.2666 -0.4562 1.4408<br>C 1.9016 -0.5500 0.0518<br>C 2.5736 -0.6737 -1.1978<br>C 3.9542 -0.6030 -1.2752<br>C 4.7304 -0.4086 -0.1265<br>C 4.0913 -0.2856 1.1109<br>C 2.7095 -0.3520 1.2071<br>H 0.1563 0.4119 1.9542<br>C -1.3036 1.7886 -0.3524<br>O -1.2547 2.1641 -1.4971<br>O -0.6406 2.3955 0.6567<br>C 0.1966 3.5075 0.2793<br>H -1.0323 -3.1817 0.2138<br>H -1.5197 -1.8275 -2.1092<br>H -2.8858 -2.1637 1.8566<br>H -3.0359 0.0883 -1.8273<br>H -3.1097 1.2345 0.4621<br>H -4.1050 -2.0056 -0.5444<br>H -2.1496 0.1401 2.2851<br>H -0.0767 -1.3166 2.0989<br>H 1.9845 -0.8202 -2.0929<br>H 4.4376 -0.6997 -2.2417<br>H 5.8108 -0.3563 -0.1946<br>H 4.6799 -0.1383 2.0103<br>H 2.2480 -0.2580 2.1822<br>H 0.6414 3.8630 1.2061<br>H -0.4005 4.2916 -0.1879<br>H 0.9694 3.1781 -0.4157<br>H -4.4347 -0.5329 0.3934 |                                                                       |

**Table S15.** Comparison of triplet diradicals in the bicyclo[2.2.2]octane system with vicinal endo COOMe (no Me substitution in the tether)

| Gamma 1,4-diradical (triplet)<br>B3LYP/6-311+G(d,p)<br>-923.786978746 Hartrees                                                                                                                                                                                                                                                                                                                                                                                                                                                                                                                                                                                                                                                                                                                                                                                                                                                                                                                                                                                                                                                                                       | Delta 1,4-diradical (triplet)<br>B3LYP/6-311+G(d,p)<br>-923.776963909 Hartrees                                                                                                                                                                                                                                                                                                                                                                                                                                                                                                                                                                                                                                                                                                                                                                                                                                                                                                                                                                                                                                                                                             | $\Delta E = 6.3$ kcal/mol<br>(triplet gamma diradical is lower in energy) |
|----------------------------------------------------------------------------------------------------------------------------------------------------------------------------------------------------------------------------------------------------------------------------------------------------------------------------------------------------------------------------------------------------------------------------------------------------------------------------------------------------------------------------------------------------------------------------------------------------------------------------------------------------------------------------------------------------------------------------------------------------------------------------------------------------------------------------------------------------------------------------------------------------------------------------------------------------------------------------------------------------------------------------------------------------------------------------------------------------------------------------------------------------------------------|----------------------------------------------------------------------------------------------------------------------------------------------------------------------------------------------------------------------------------------------------------------------------------------------------------------------------------------------------------------------------------------------------------------------------------------------------------------------------------------------------------------------------------------------------------------------------------------------------------------------------------------------------------------------------------------------------------------------------------------------------------------------------------------------------------------------------------------------------------------------------------------------------------------------------------------------------------------------------------------------------------------------------------------------------------------------------------------------------------------------------------------------------------------------------|---------------------------------------------------------------------------|
| 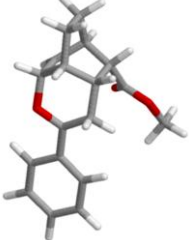                                                                                                                                                                                                                                                                                                                                                                                                                                                                                                                                                                                                                                                                                                                                                                                                                                                                                                                                                                                                                                                                                    |                                                                                                                                                                                                                                                                                                                                                                                                                                                                                                                                                                                                                                                                                                                                                                                                                                                                                                                                                                                                                                                                                           |                                                                           |
| C 1.3016 -1.9386 0.2256<br>C 1.6237 -1.0643 1.3920<br>C 2.0774 -1.4088 -0.9896<br>O -0.1365 -1.9867 -0.0272<br>C 2.5854 0.0433 1.1032<br>C 2.0048 0.9353 -0.0329<br>C 3.9028 -0.5734 0.5665<br>C 1.5617 0.0262 -1.2471<br>C -0.7250 -0.8565 -0.5258<br>C 0.0480 -0.0617 -1.5355<br>C -2.1106 -0.6990 -0.2473<br>C -2.7701 -1.5570 0.6774<br>C -4.1182 -1.4056 0.9557<br>C -4.8730 -0.4060 0.3316<br>C -4.2477 0.4419 -0.5877<br>C -2.8992 0.3033 -0.8783<br>H -0.3746 0.9348 -1.6465<br>C 0.9571 1.8967 0.5056<br>O 0.5300 1.9181 1.6331<br>O 0.5941 2.8006 -0.4357<br>C -0.3719 3.7874 -0.0196<br>H 1.5403 -2.9914 0.4147<br>H 1.0992 -1.1688 2.3325<br>H 1.8569 -2.0311 -1.8619<br>H 2.7716 0.6494 1.9896<br>H 2.8106 1.5826 -0.3979<br>H 4.3609 -1.1826 1.3489<br>H 2.0377 0.4195 -2.1490<br>H -0.0557 -0.5481 -2.5207<br>H -2.1964 -2.3332 1.1654<br>H -4.5921 -2.0723 1.6685<br>H -5.9277 -0.2929 0.5539<br>H -4.8226 1.2149 -1.0868<br>H -2.4516 0.9659 -1.6086<br>H -0.5382 4.4160 -0.8918<br>H 0.0212 4.3773 0.8093<br>H -1.2990 3.3043 0.2915<br>C 3.5871 -1.4309 -0.6917<br>H 4.6125 0.2259 0.3295<br>H 3.9153 -2.4650 -0.5488<br>H 4.1266 -1.0551 -1.5663 | C -2.0965 -2.0246 0.3660<br>C -1.5359 -1.4481 -0.8891<br>C -2.6768 -0.9705 1.2496<br>O -0.0791 -1.3493 -0.8268<br>C -2.2149 -0.0780 -1.1449<br>C -1.7538 0.9497 -0.0872<br>C -3.7331 -0.2742 -0.9289<br>C -1.6235 0.1953 1.2663<br>C 0.5516 -0.8011 0.2571<br>C -0.1965 -0.3652 1.4932<br>C 1.9729 -0.7533 0.1447<br>C 2.6224 -1.1399 -1.0624<br>C 4.0011 -1.0883 -1.1814<br>C 4.8004 -0.6604 -0.1155<br>C 4.1853 -0.2857 1.0825<br>C 2.8056 -0.3295 1.2182<br>H 0.3969 0.4157 1.9679<br>C -0.5733 1.8026 -0.5313<br>O -0.2141 1.9485 -1.6735<br>O -0.0415 2.4873 0.5063<br>C 1.0412 3.3822 0.1791<br>H -1.9454 -3.0601 0.6436<br>H -1.6858 -2.1033 -1.7503<br>H -2.8535 -1.3252 2.2672<br>H -1.9847 0.2751 -2.1494<br>H -2.5557 1.6919 0.0205<br>H -4.0831 -1.1367 -1.5046<br>H -1.8571 0.8734 2.0910<br>H -0.2552 -1.1879 2.2225<br>H 2.0177 -1.4672 -1.8967<br>H 4.4639 -1.3835 -2.1172<br>H 5.8790 -0.6244 -0.2150<br>H 4.7907 0.0382 1.9226<br>H 2.3695 -0.0475 2.1681<br>H 1.3186 3.8564 1.1181<br>H 0.7124 4.1269 -0.5467<br>H 1.8820 2.8220 -0.2309<br>C -3.9984 -0.4882 0.5889<br>H -4.2780 0.5971 -1.3025<br>H -4.7859 -1.2286 0.7455<br>H -4.3349 0.4376 1.0680 |                                                                           |

$^1\text{H}$  NMR (500 MHz,  $\text{CDCl}_3$ ):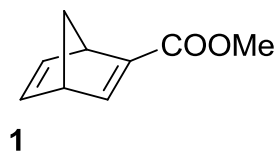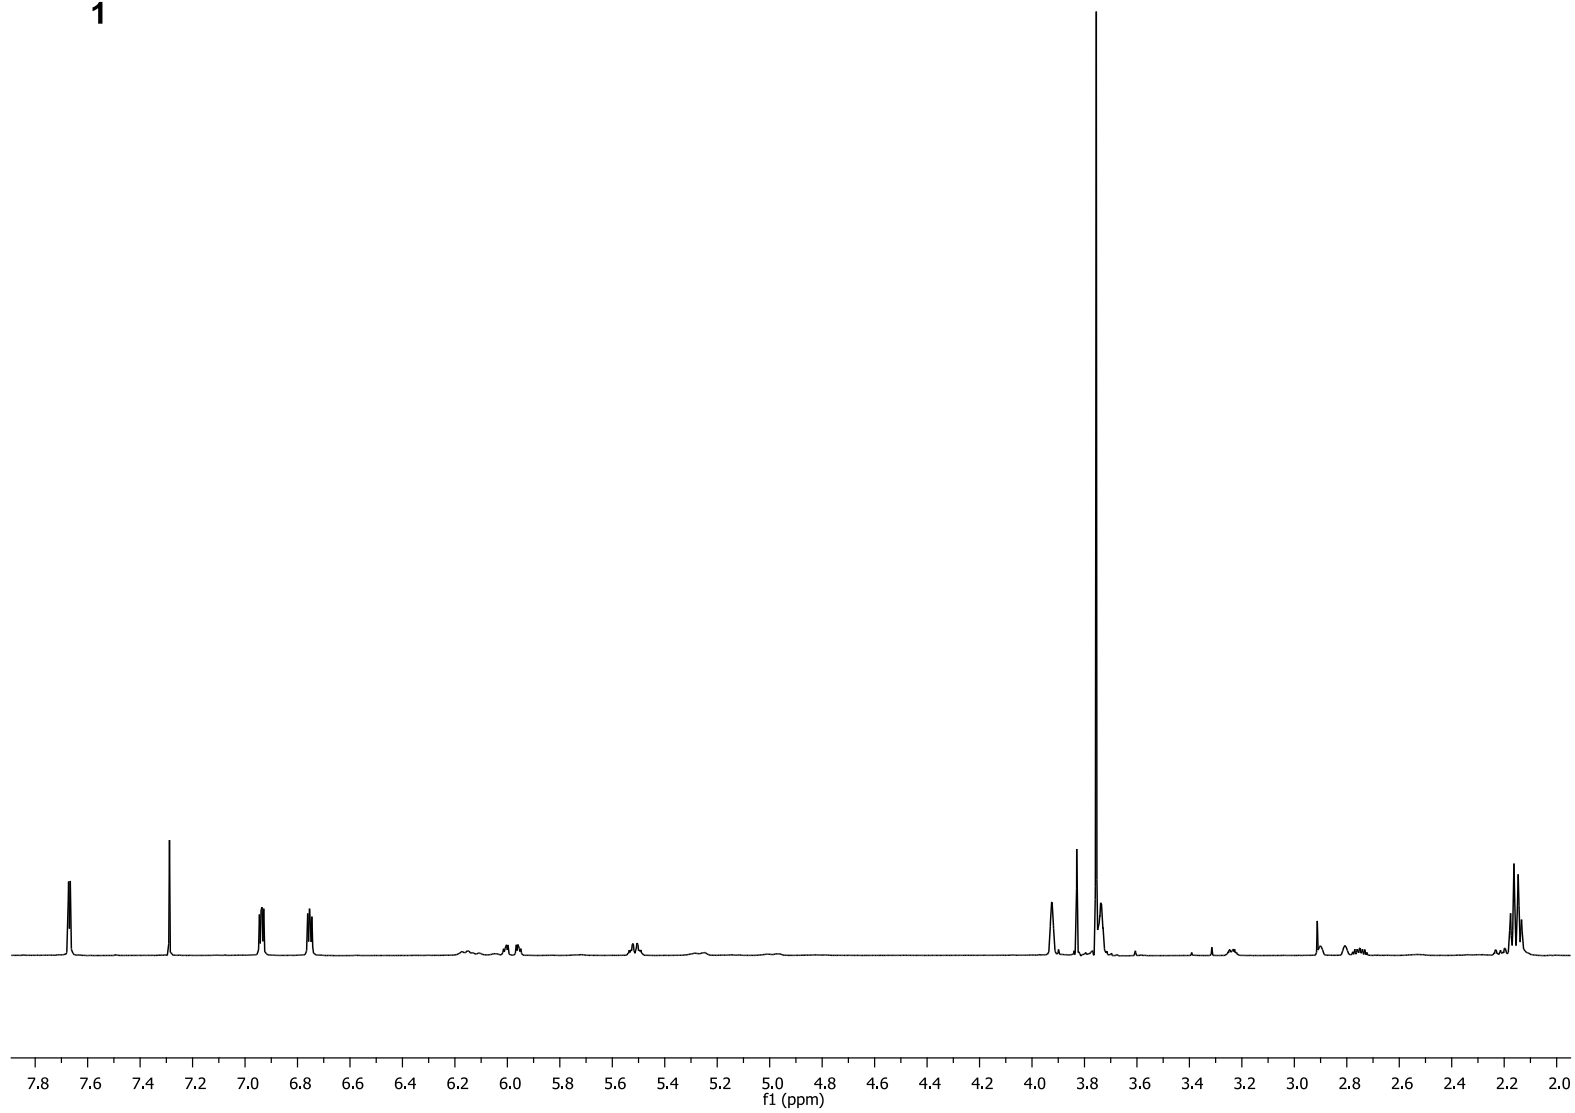

$^1\text{H}$  NMR (500 MHz,  $\text{CDCl}_3$ ):

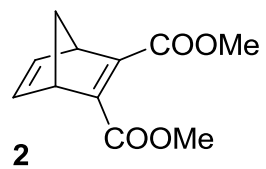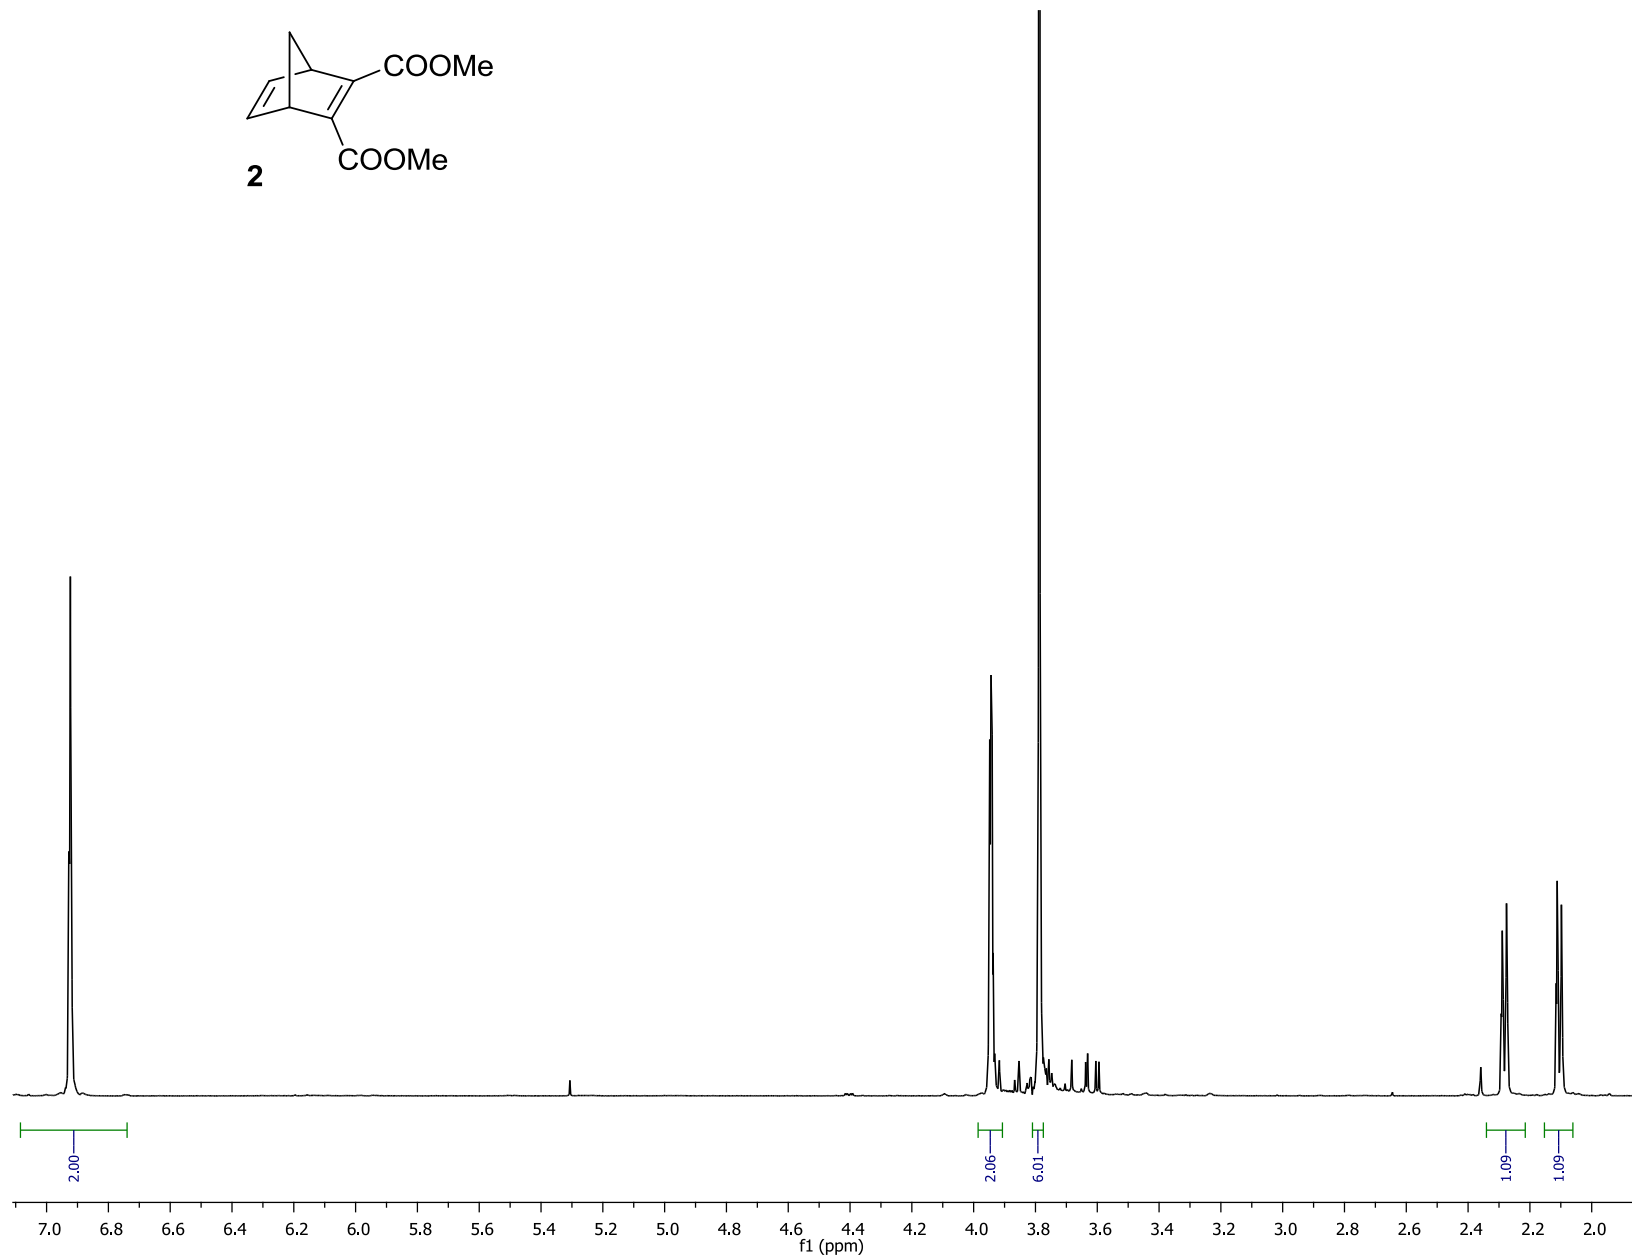

$^{13}\text{C}$  NMR (500 MHz,  $\text{CDCl}_3$ ):

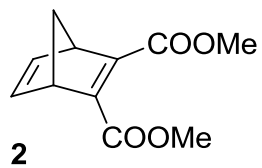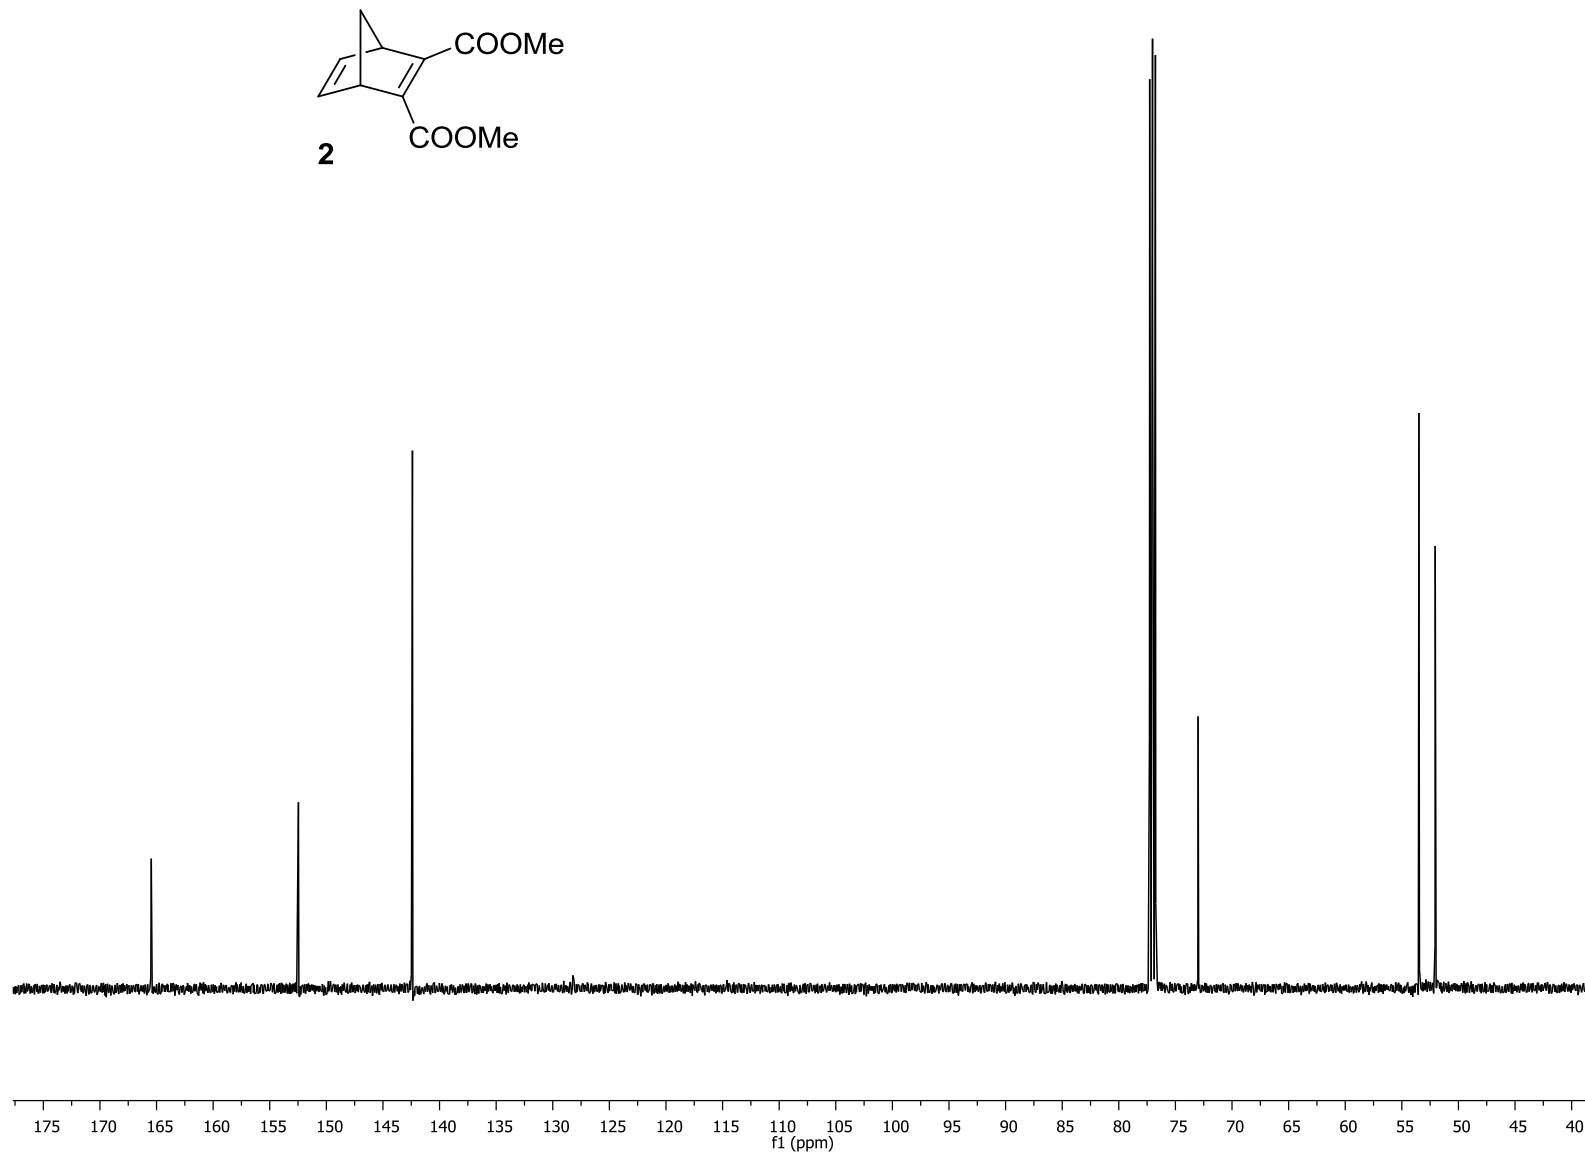

$^1\text{H}$  NMR (500 MHz,  $\text{CDCl}_3$ ):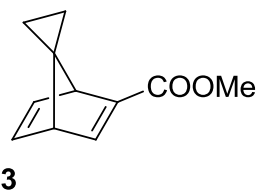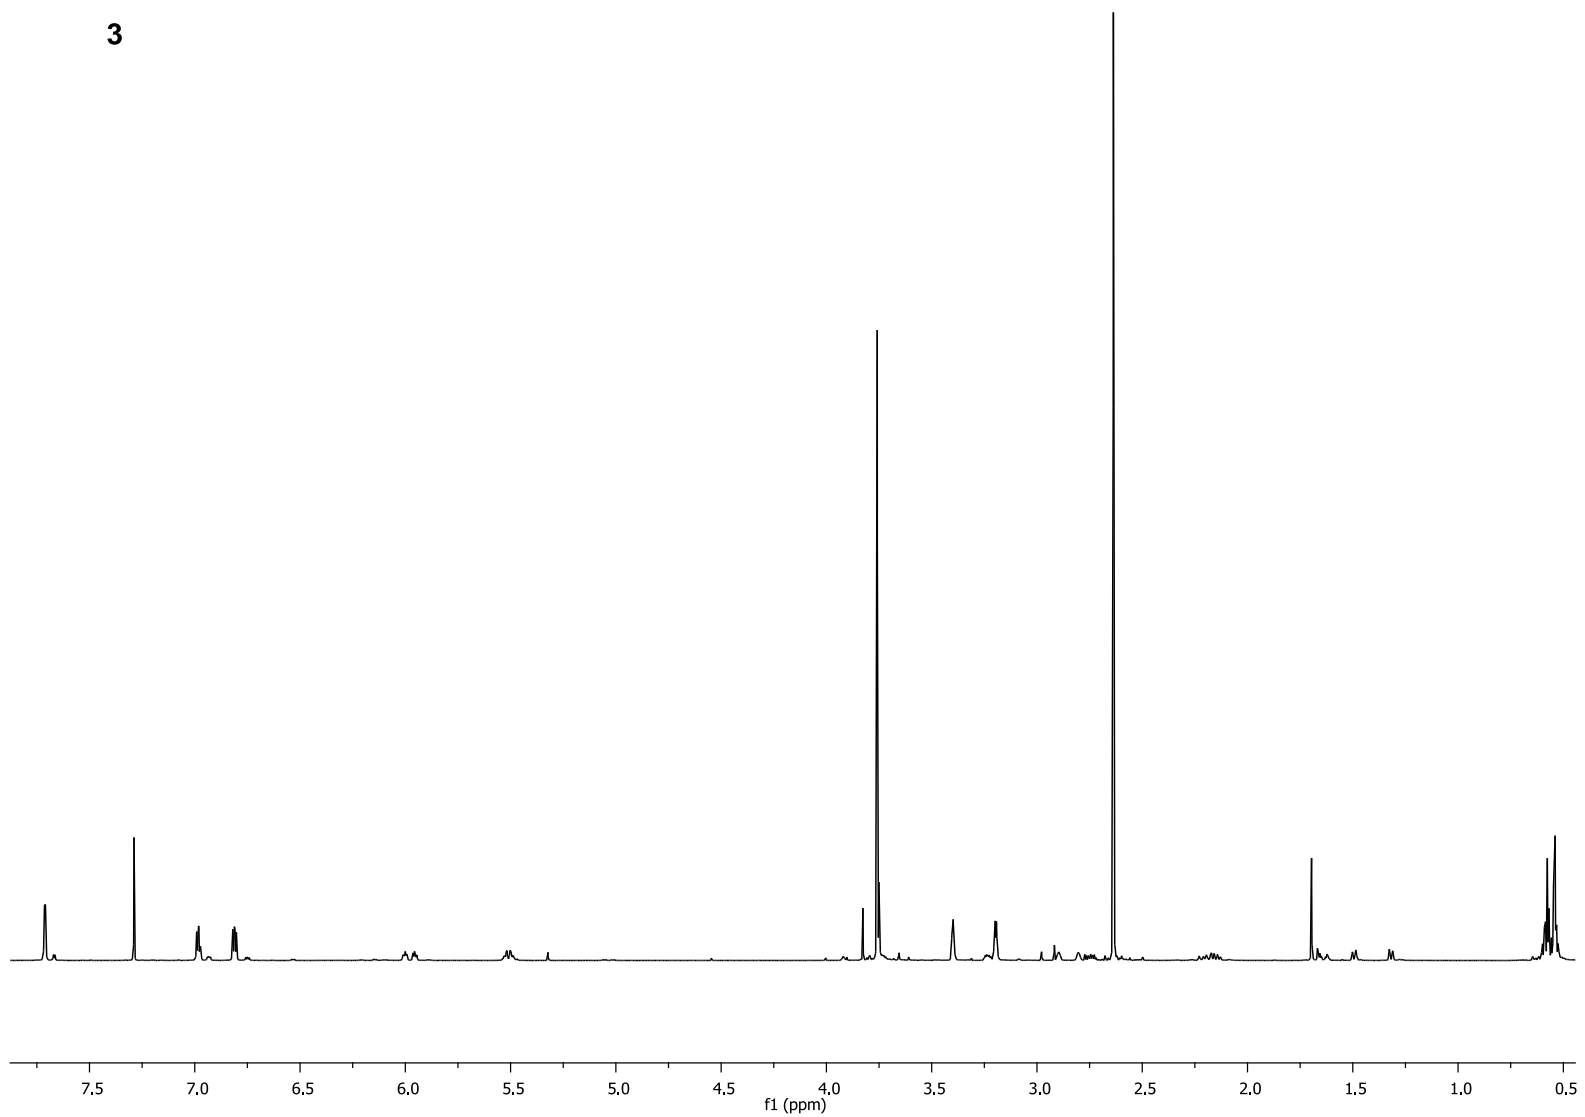



$^1\text{H}$  NMR (500 MHz,  $\text{CDCl}_3$ ):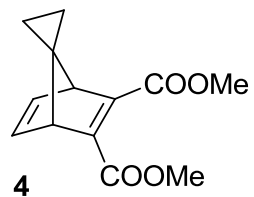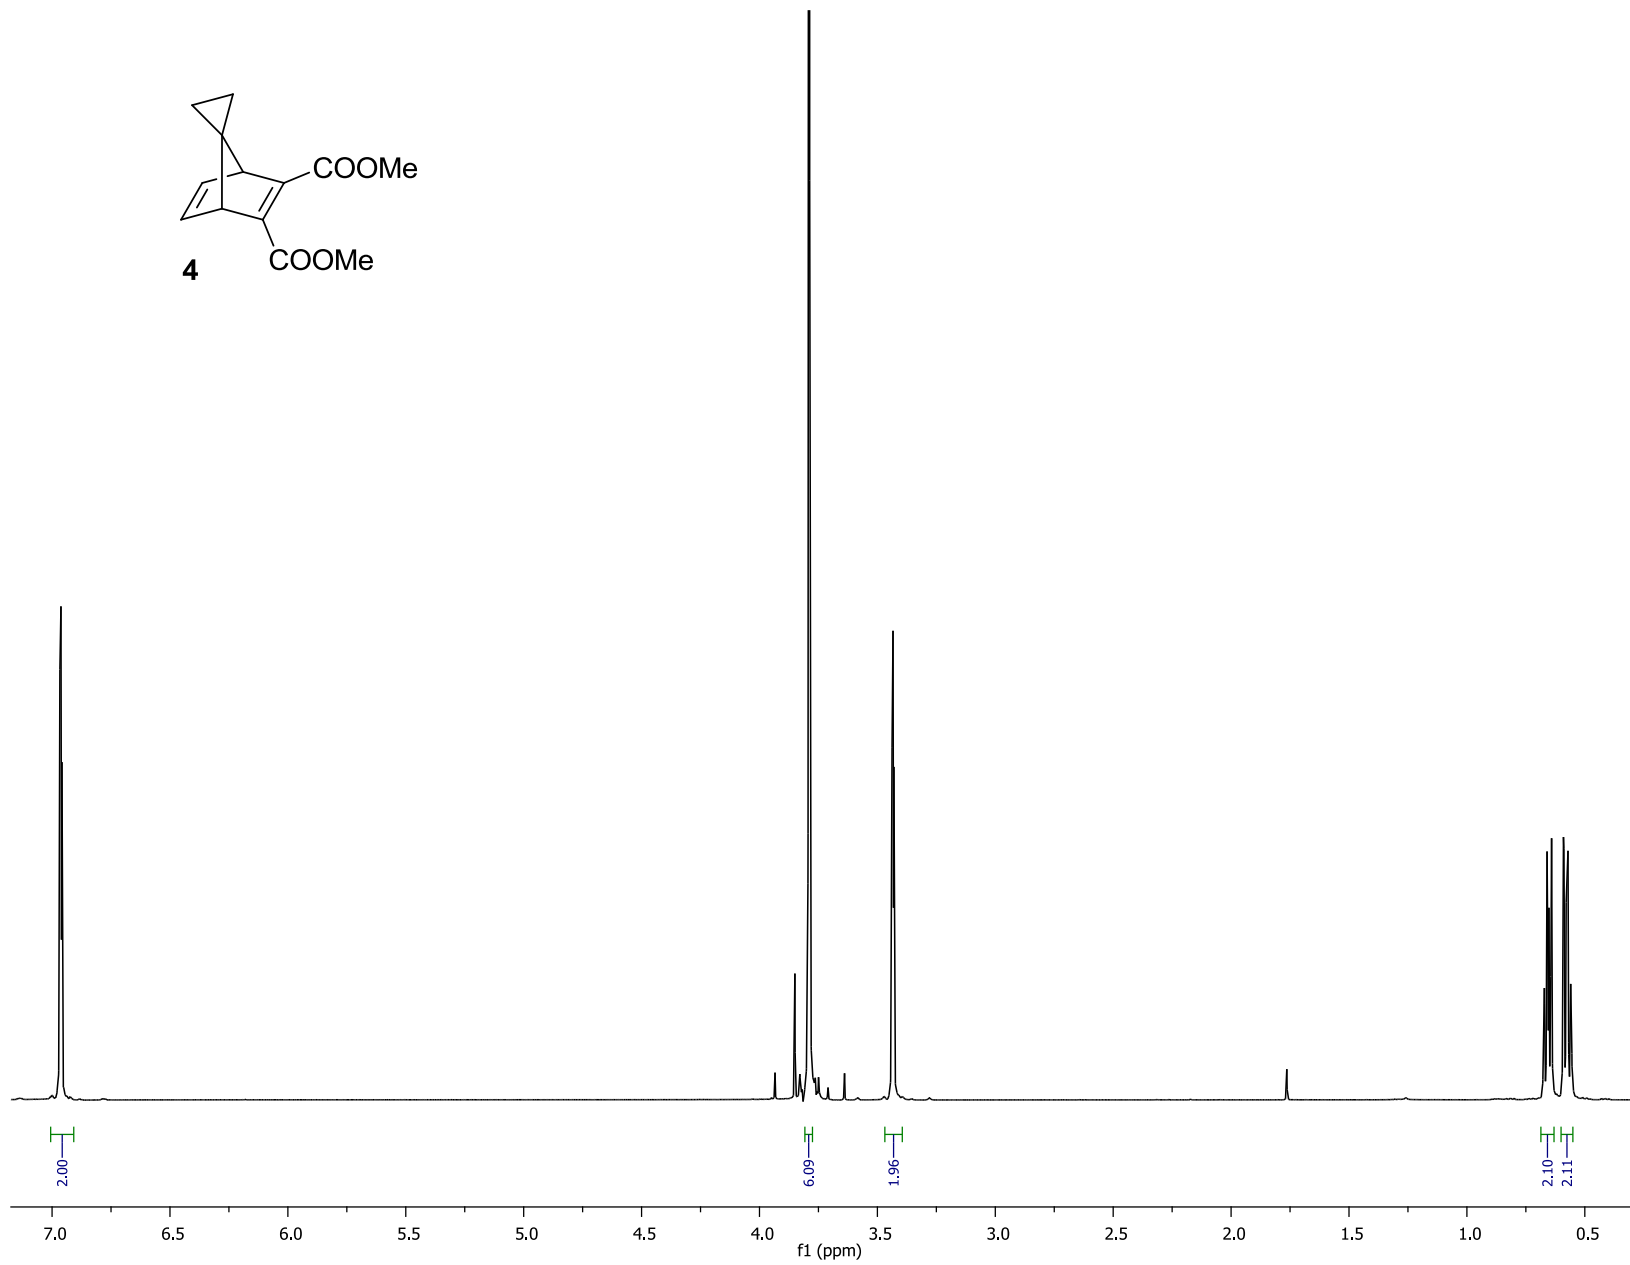

$^{13}\text{C}$  NMR (500 MHz,  $\text{CDCl}_3$ ):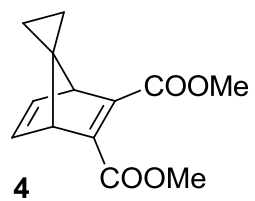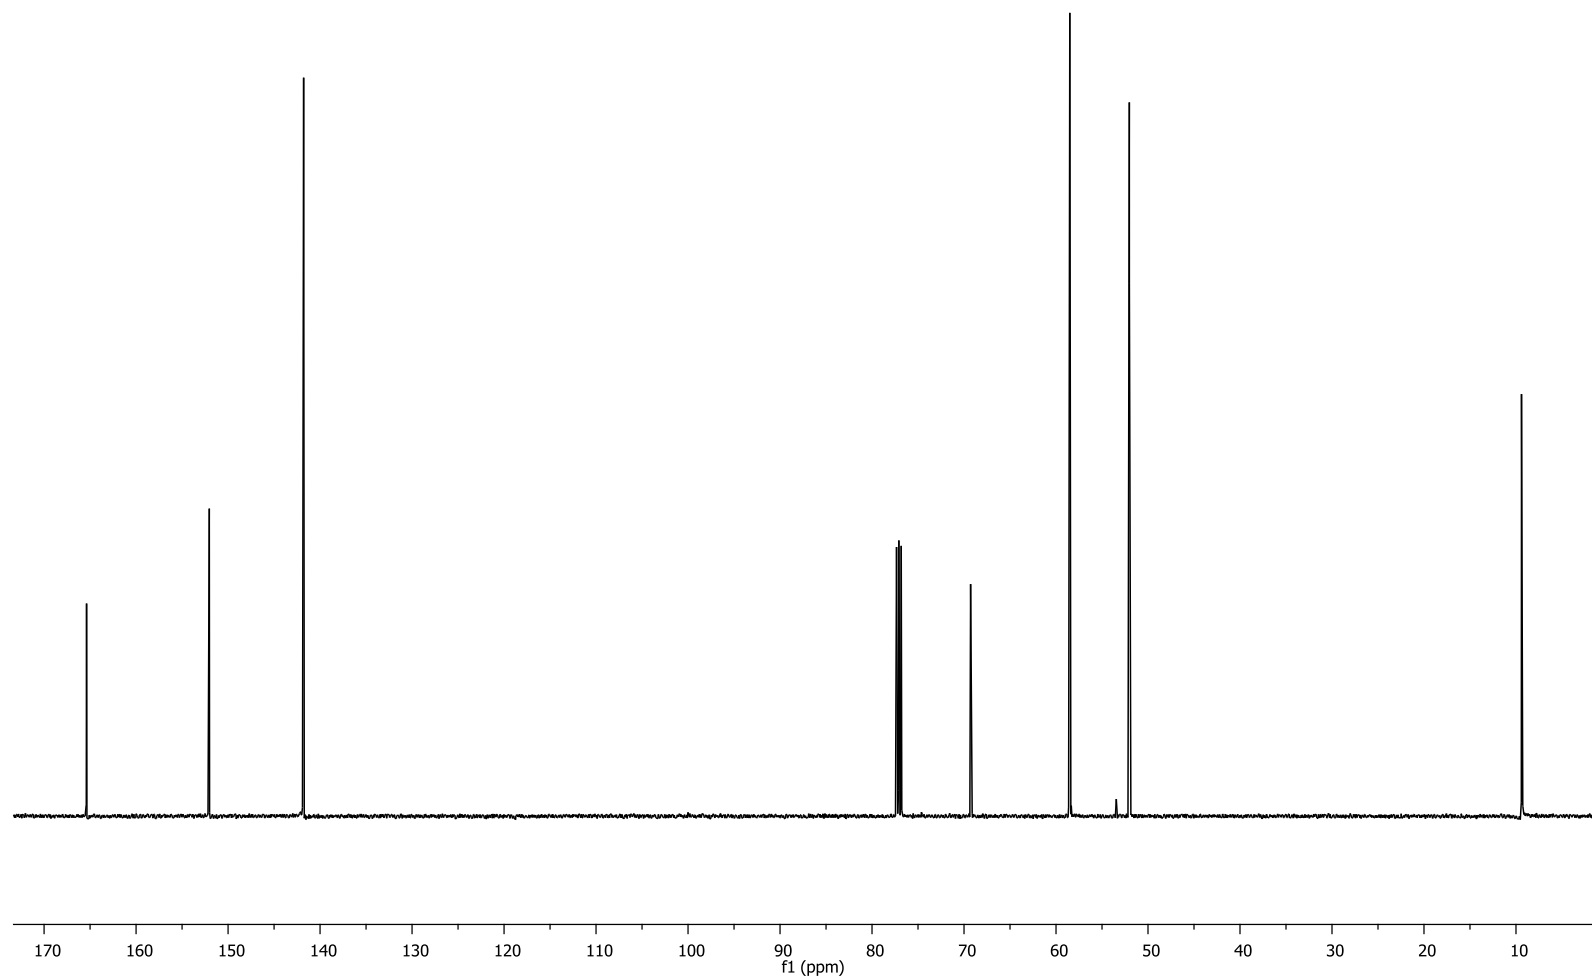

$^1\text{H}$  NMR (500 MHz,  $\text{CDCl}_3$ ):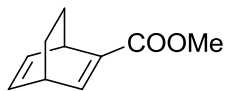**5**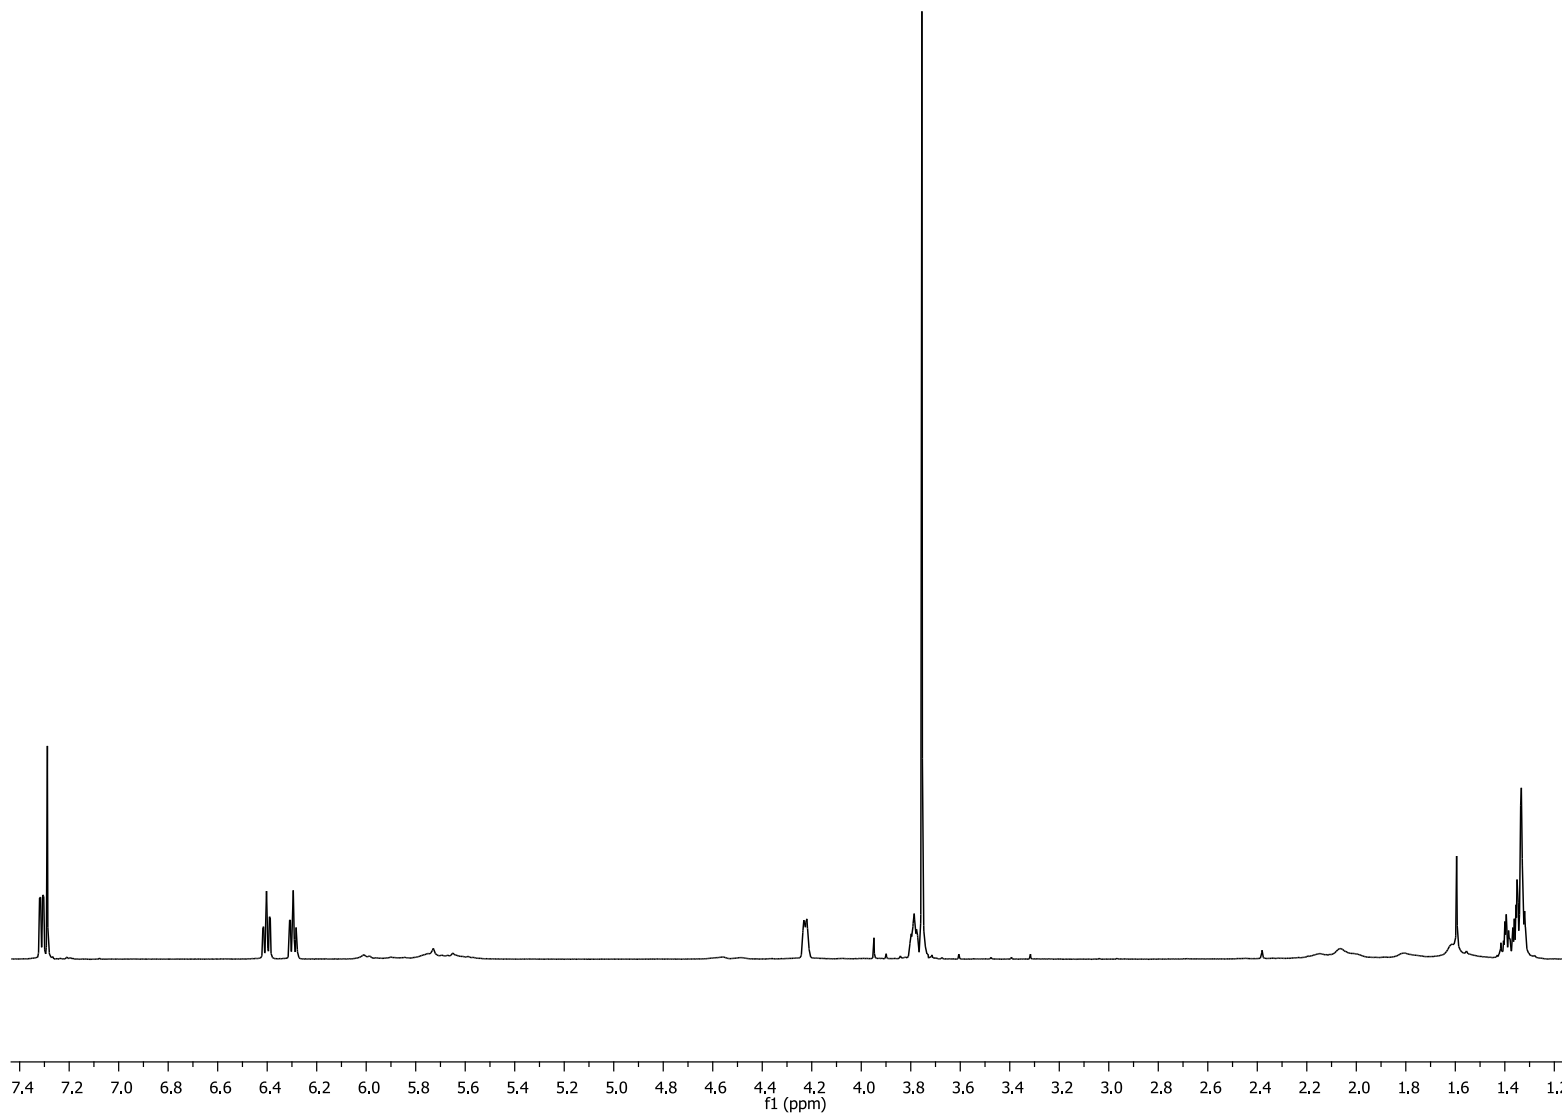

$^1\text{H}$  NMR (500 MHz,  $\text{CDCl}_3$ ):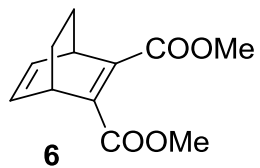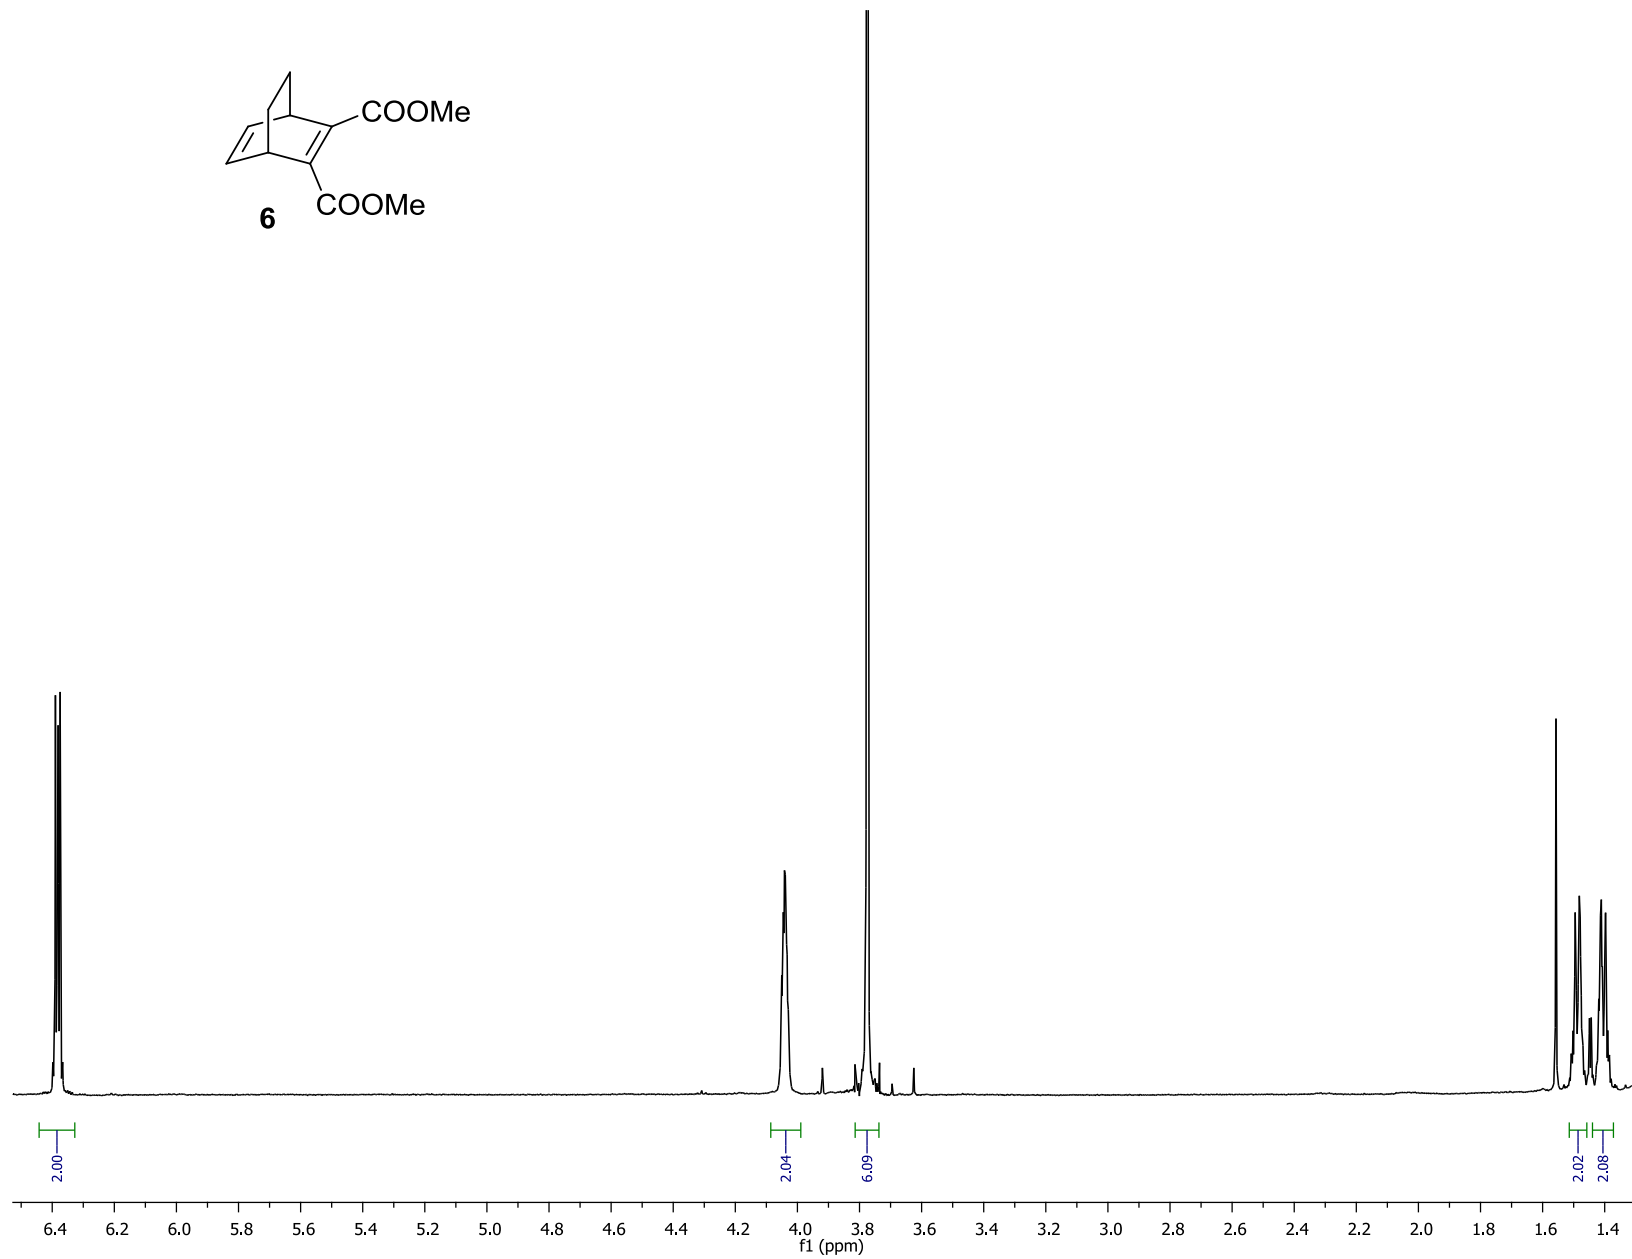

$^{13}\text{C}$  NMR (500 MHz,  $\text{CDCl}_3$ ):

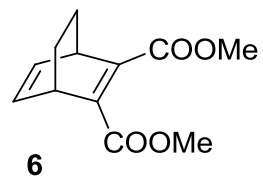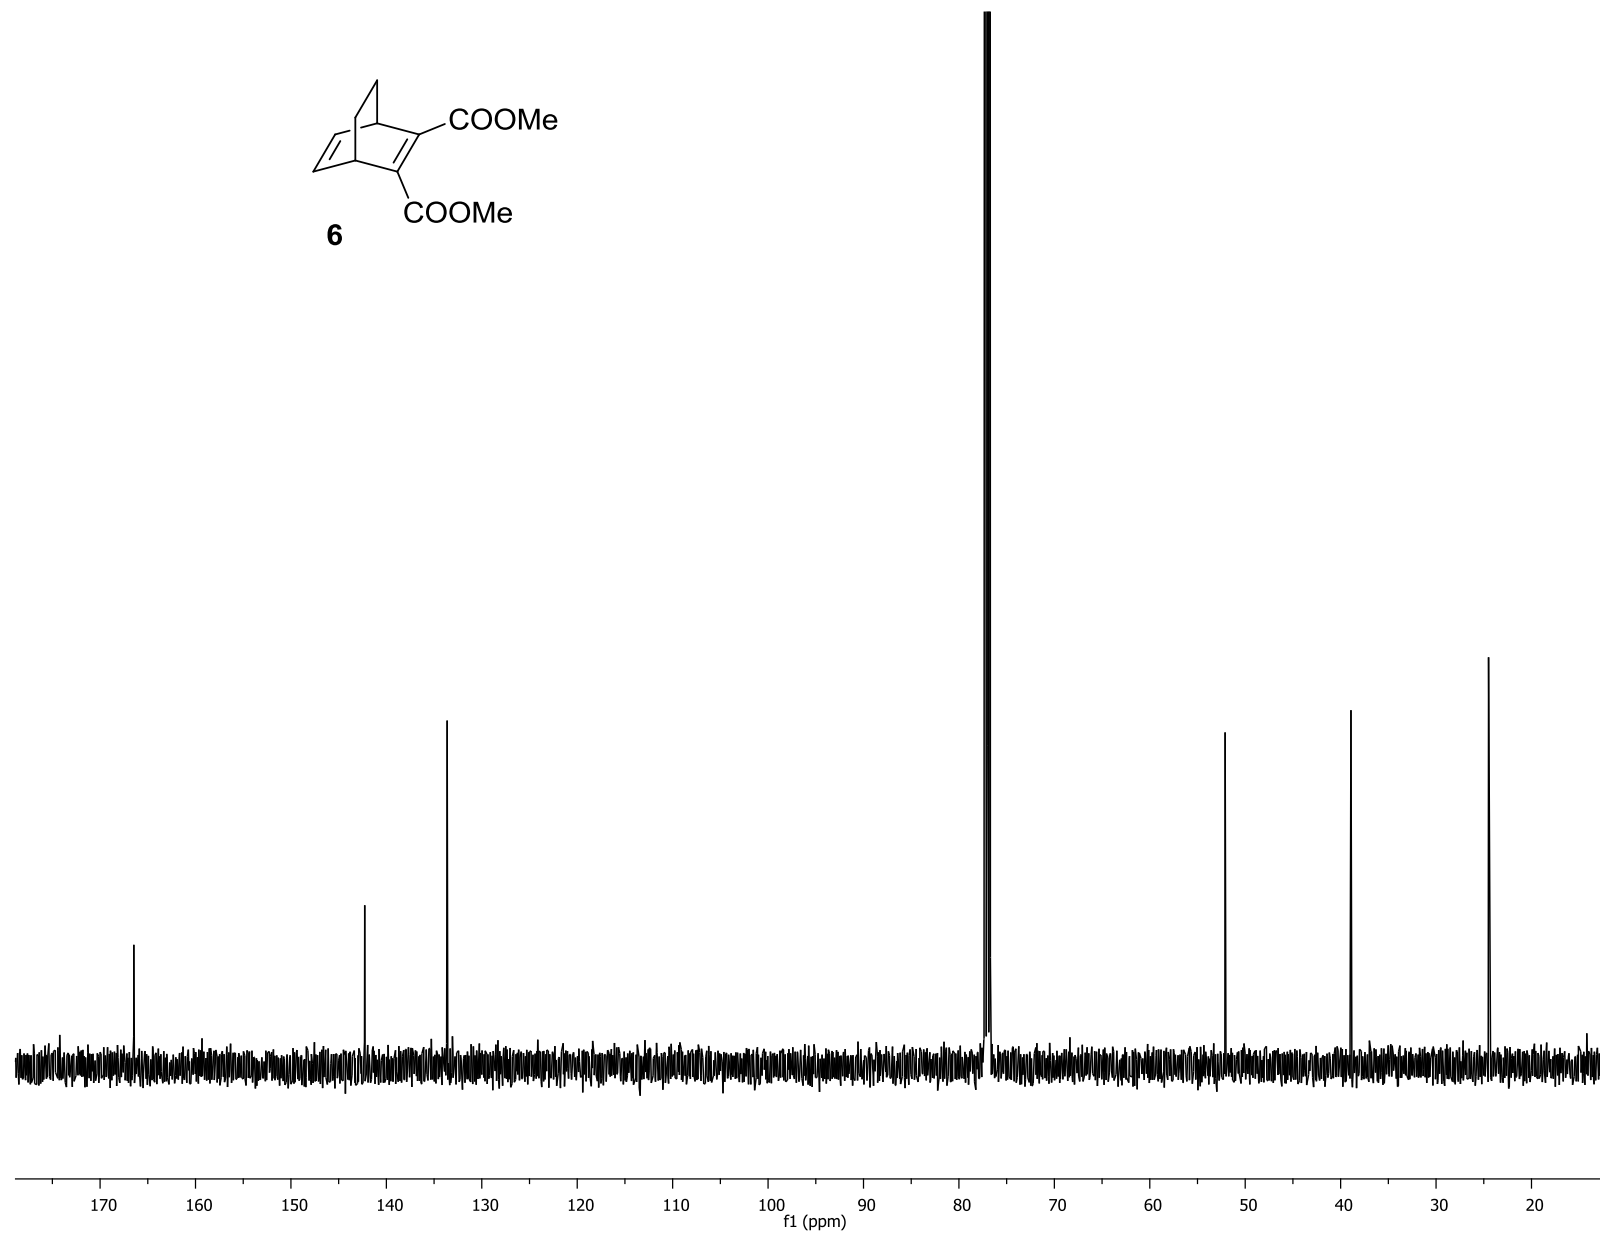

$^1\text{H}$  NMR (500 MHz,  $\text{CDCl}_3$ ):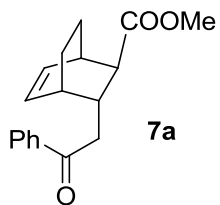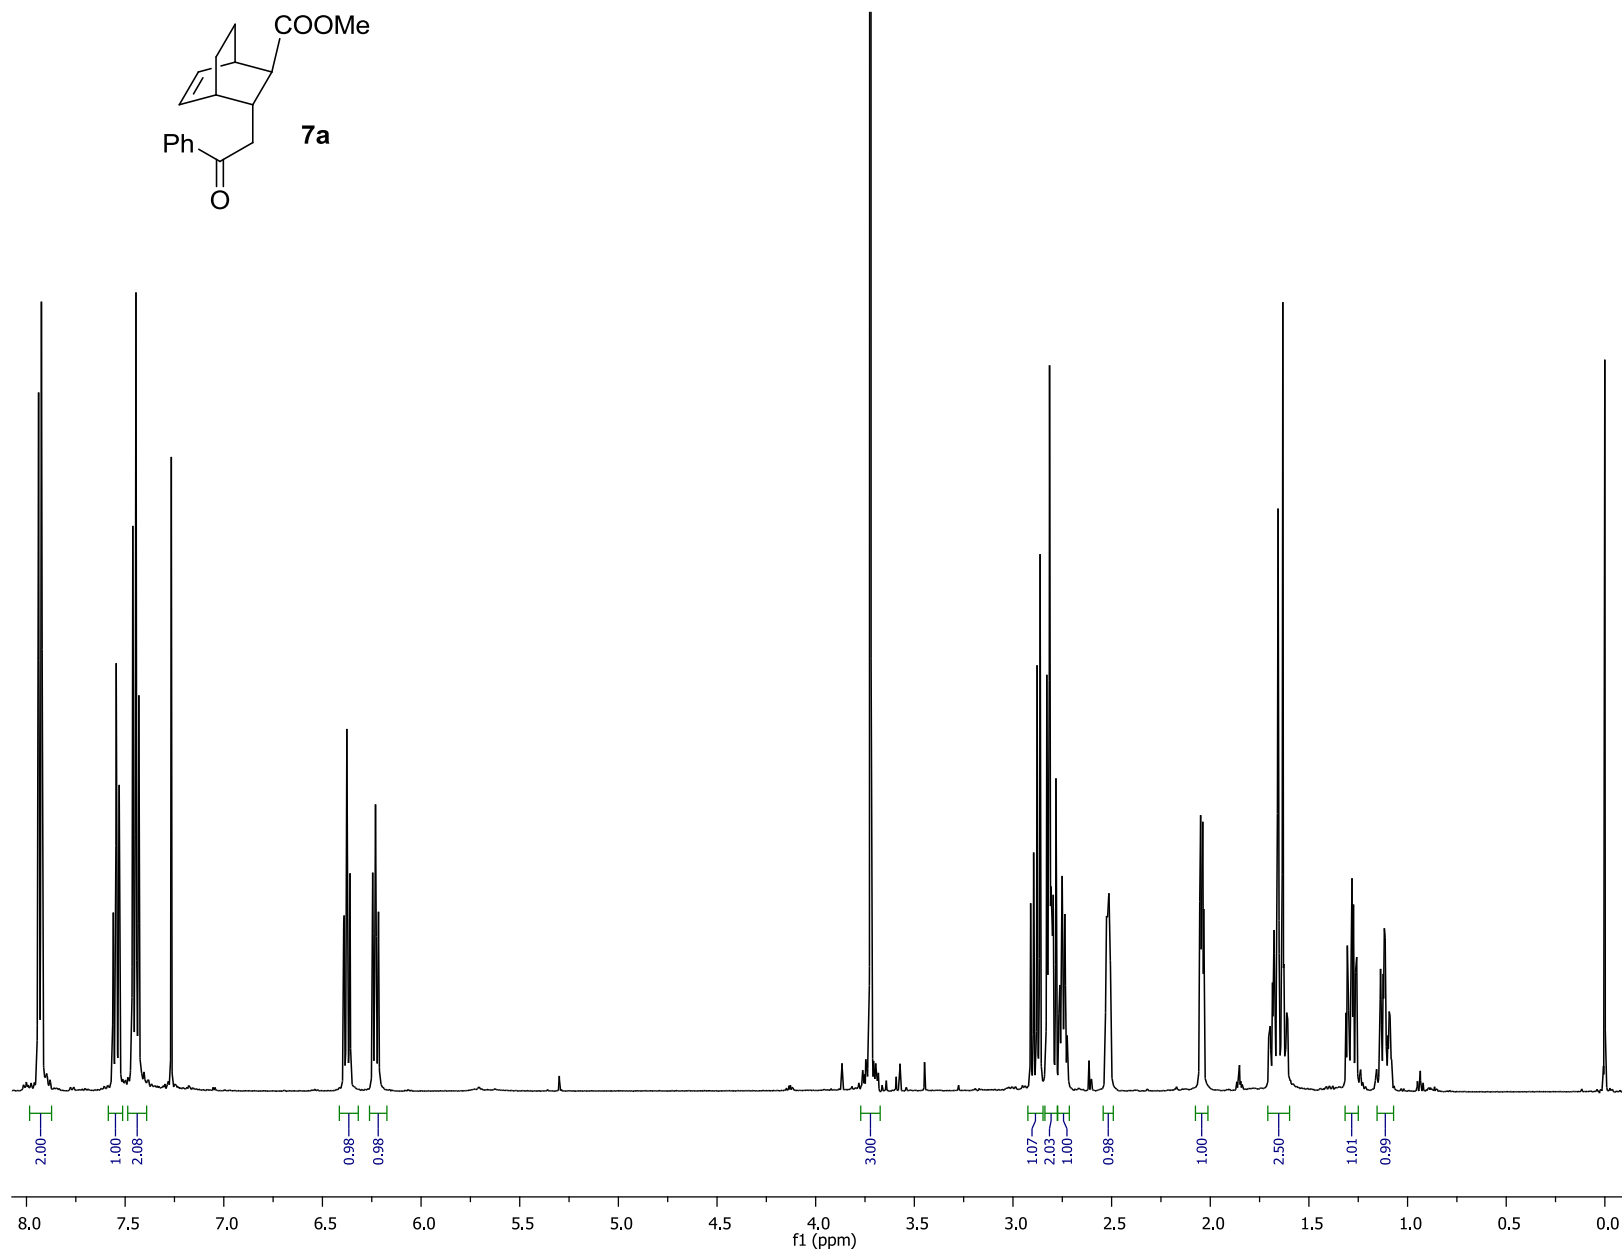

$^{13}\text{C}$  NMR (500 MHz,  $\text{CDCl}_3$ ):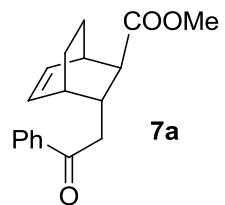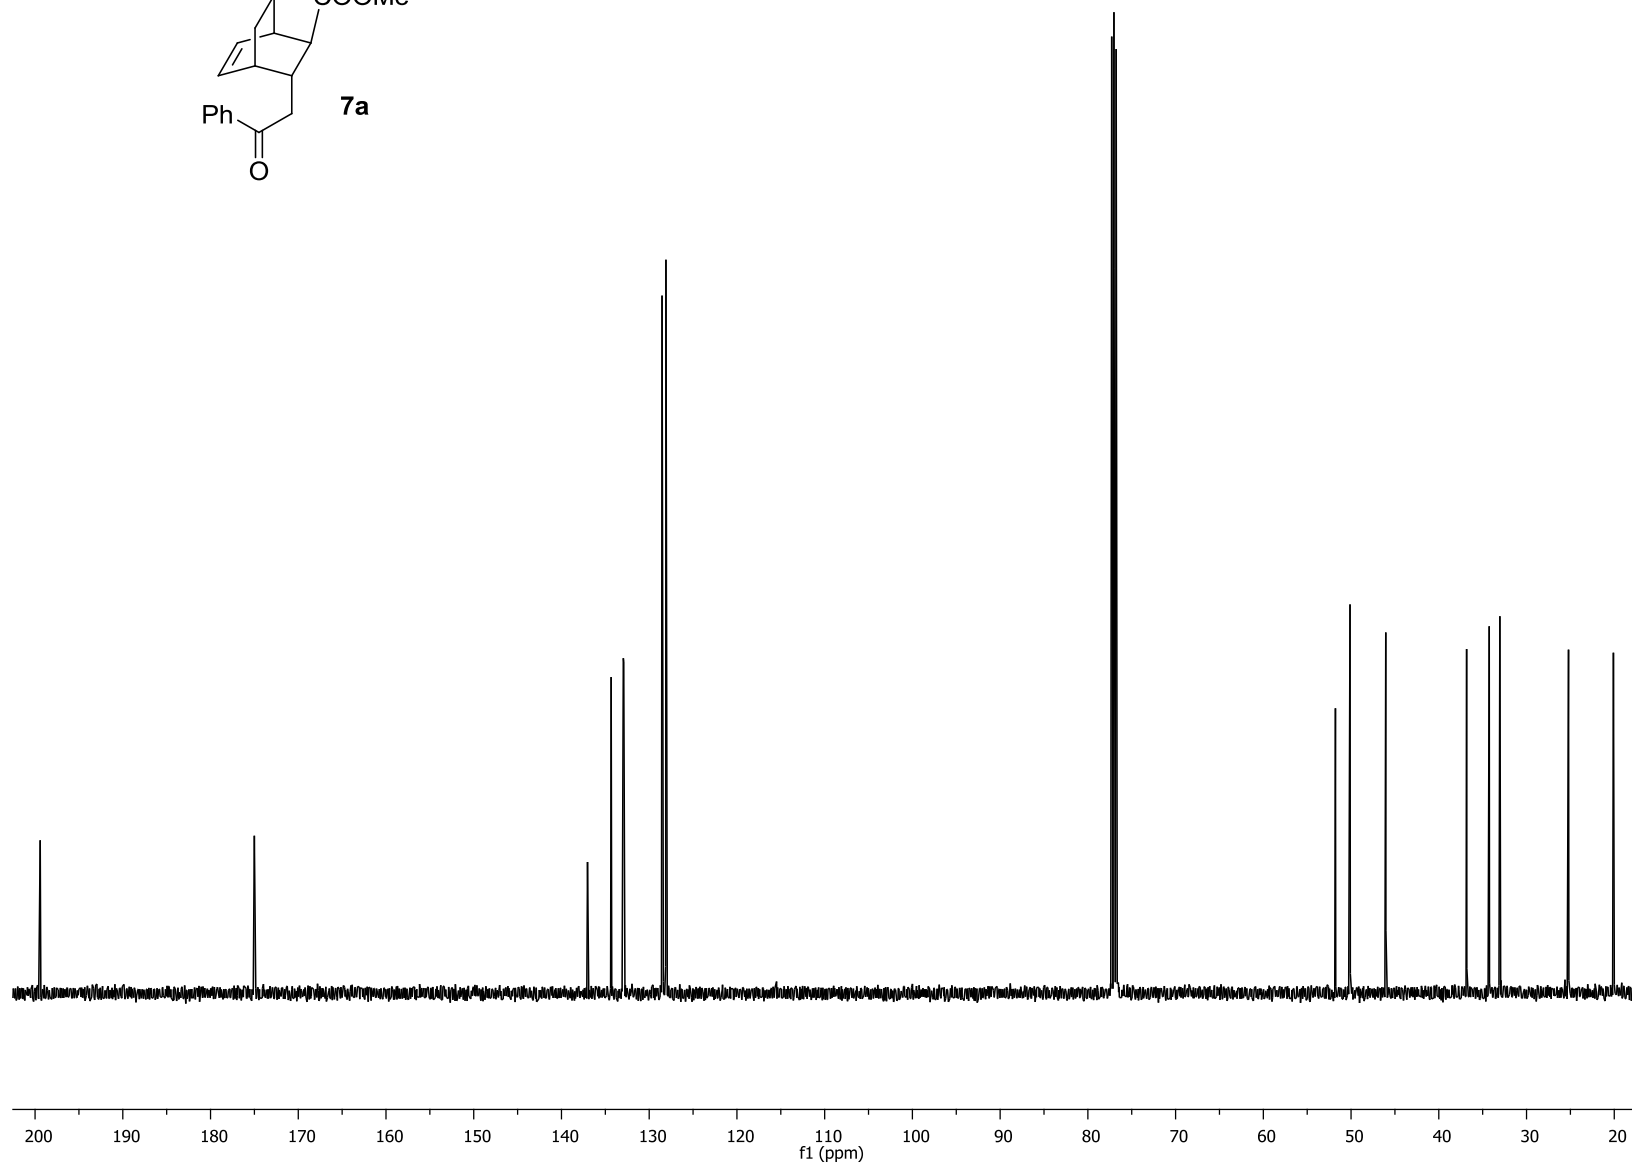

$^1\text{H}$  NMR (500 MHz,  $\text{CDCl}_3$ ):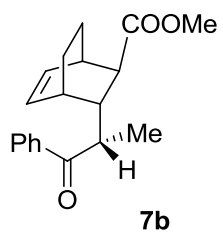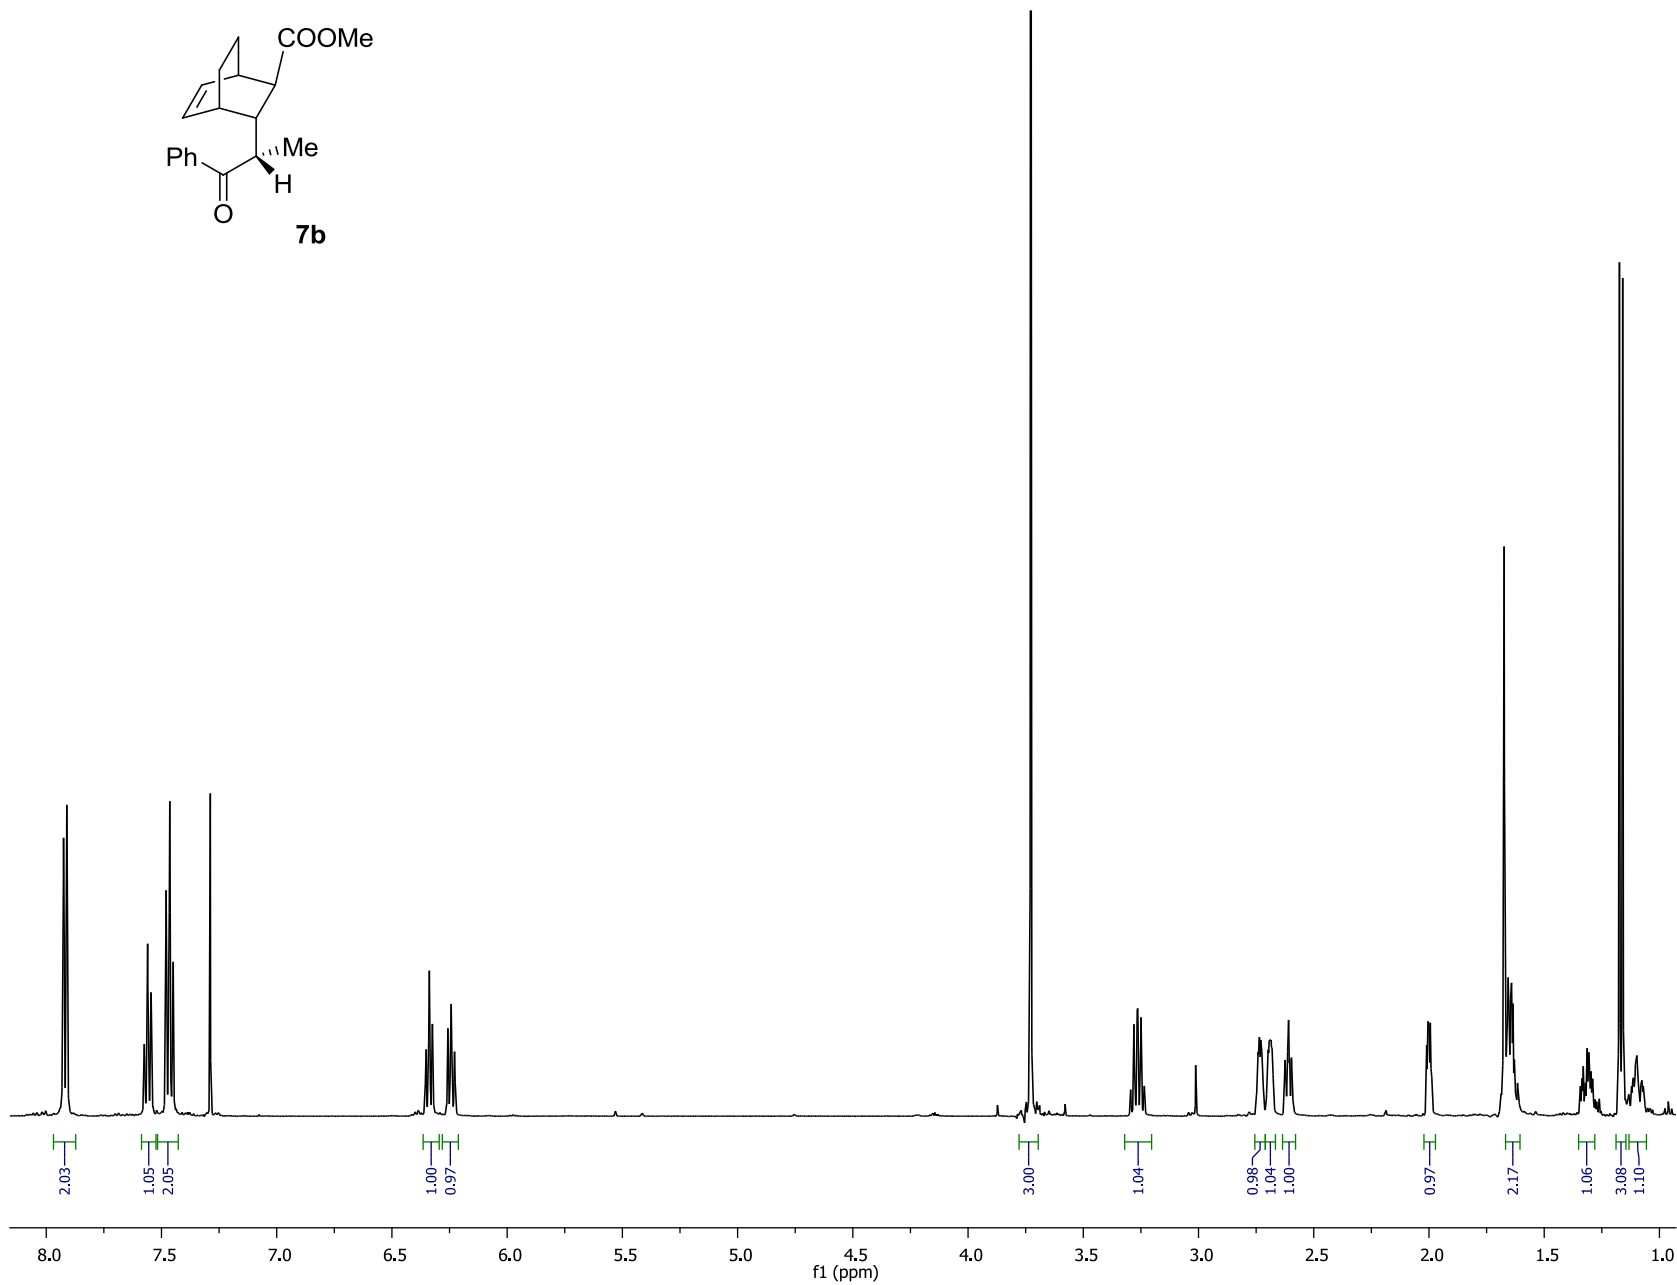



$^{13}\text{C}$  NMR (500 MHz,  $\text{CDCl}_3$ ):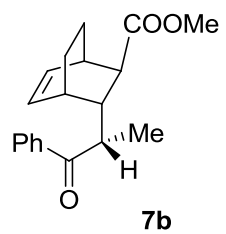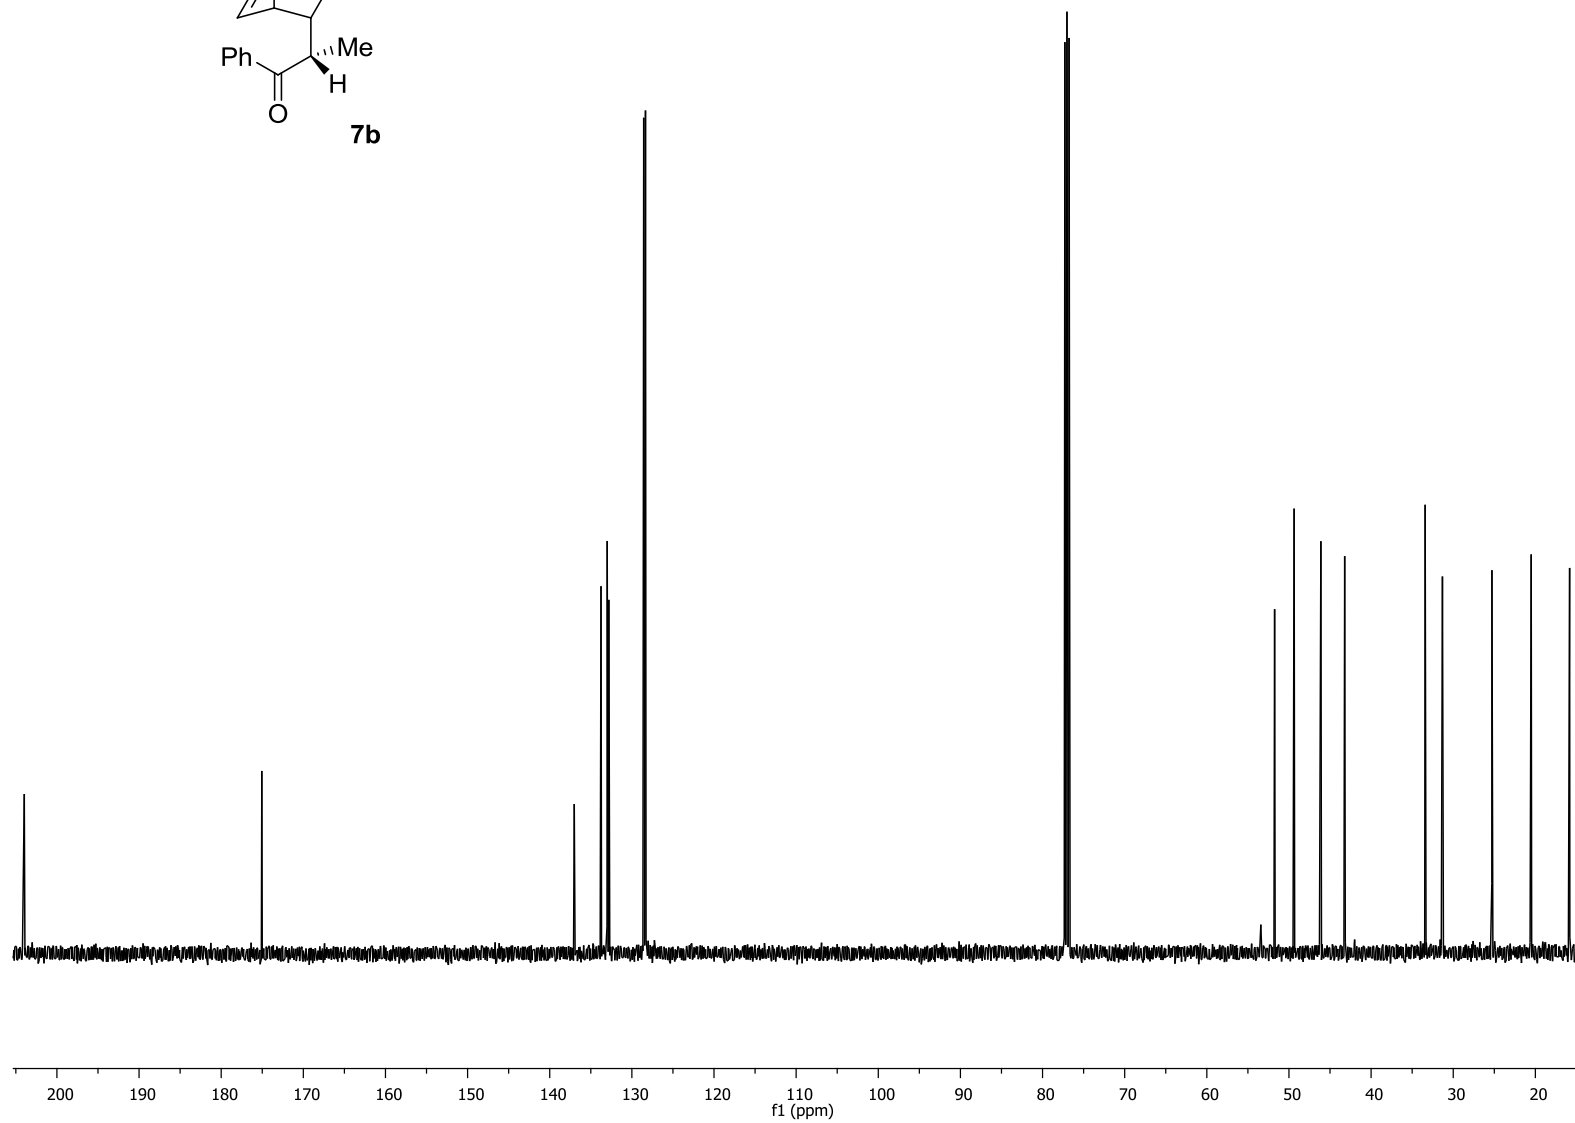

$^1\text{H}$  NMR (500 MHz,  $\text{CDCl}_3$ ):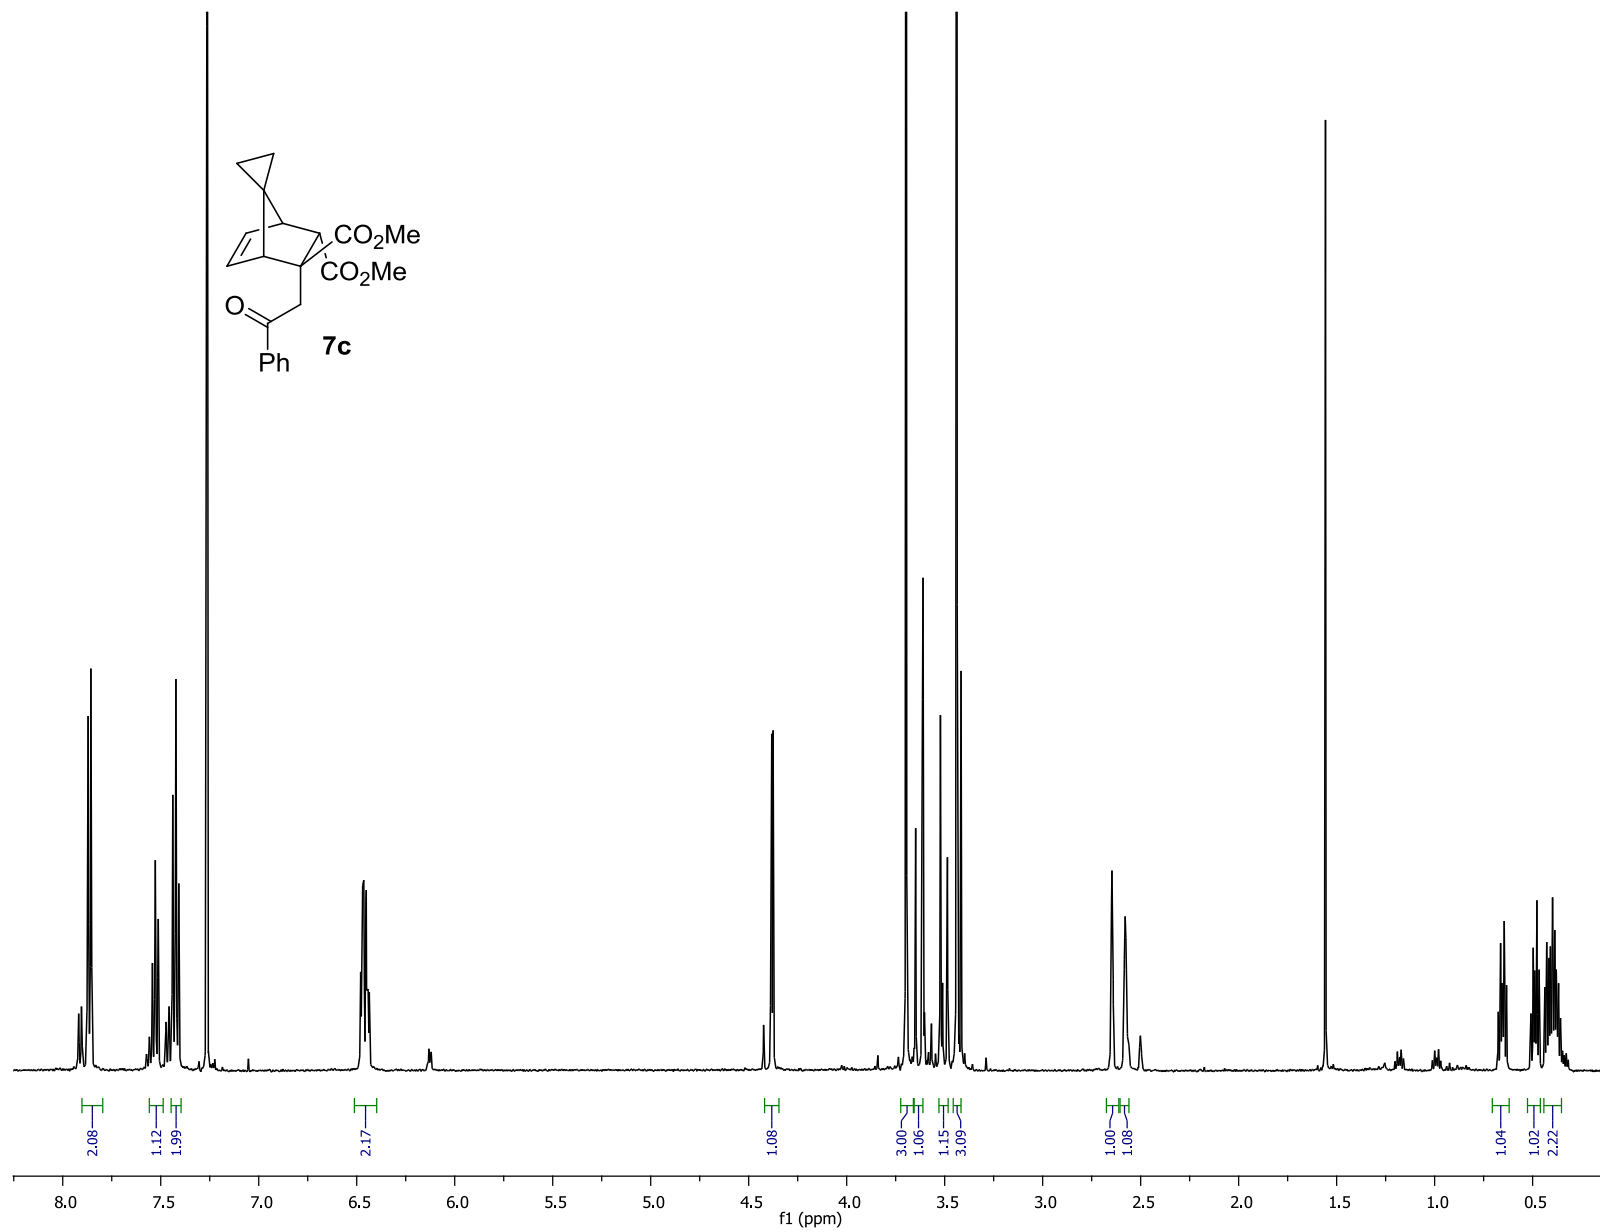

$^{13}\text{C}$  NMR (500 MHz,  $\text{CDCl}_3$ ):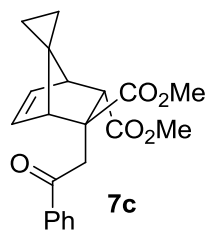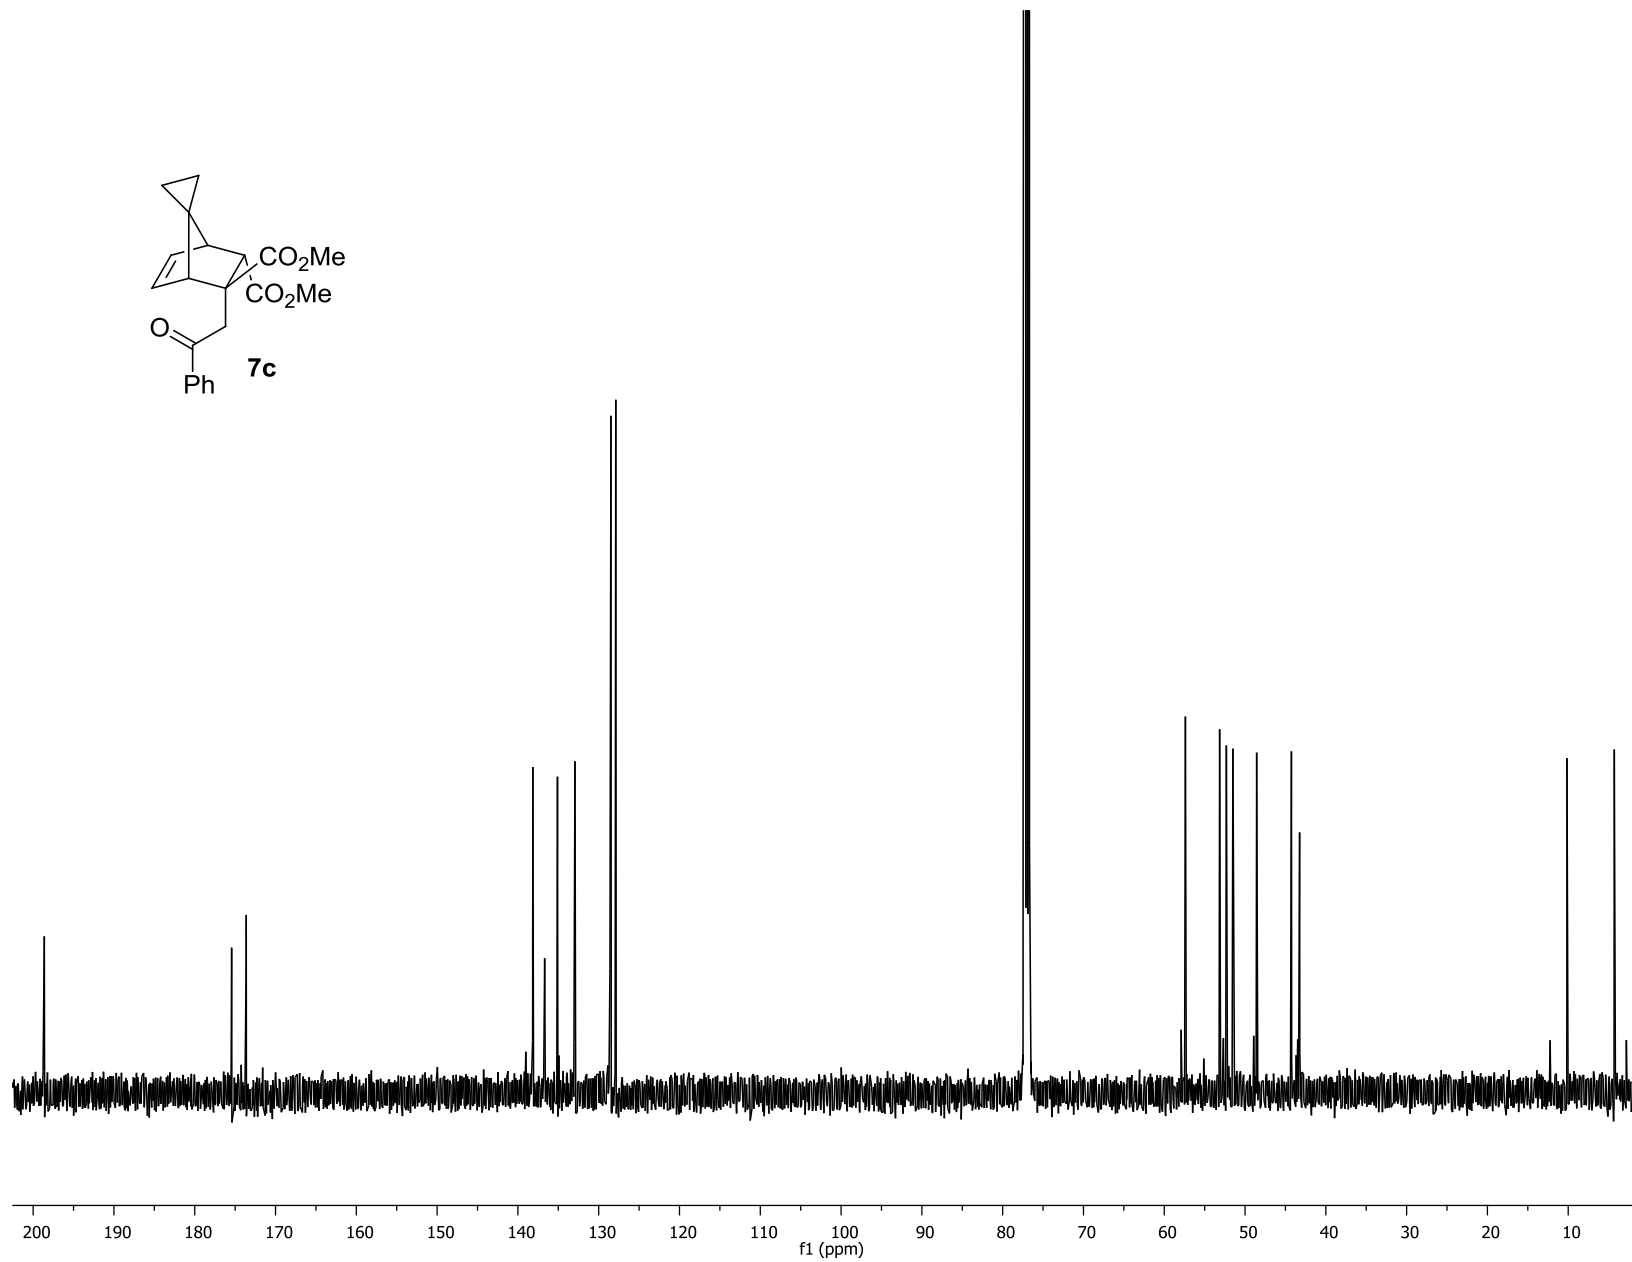

$^1\text{H}$  NMR (500 MHz,  $\text{CDCl}_3$ ):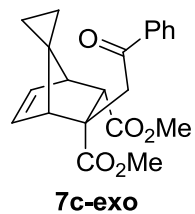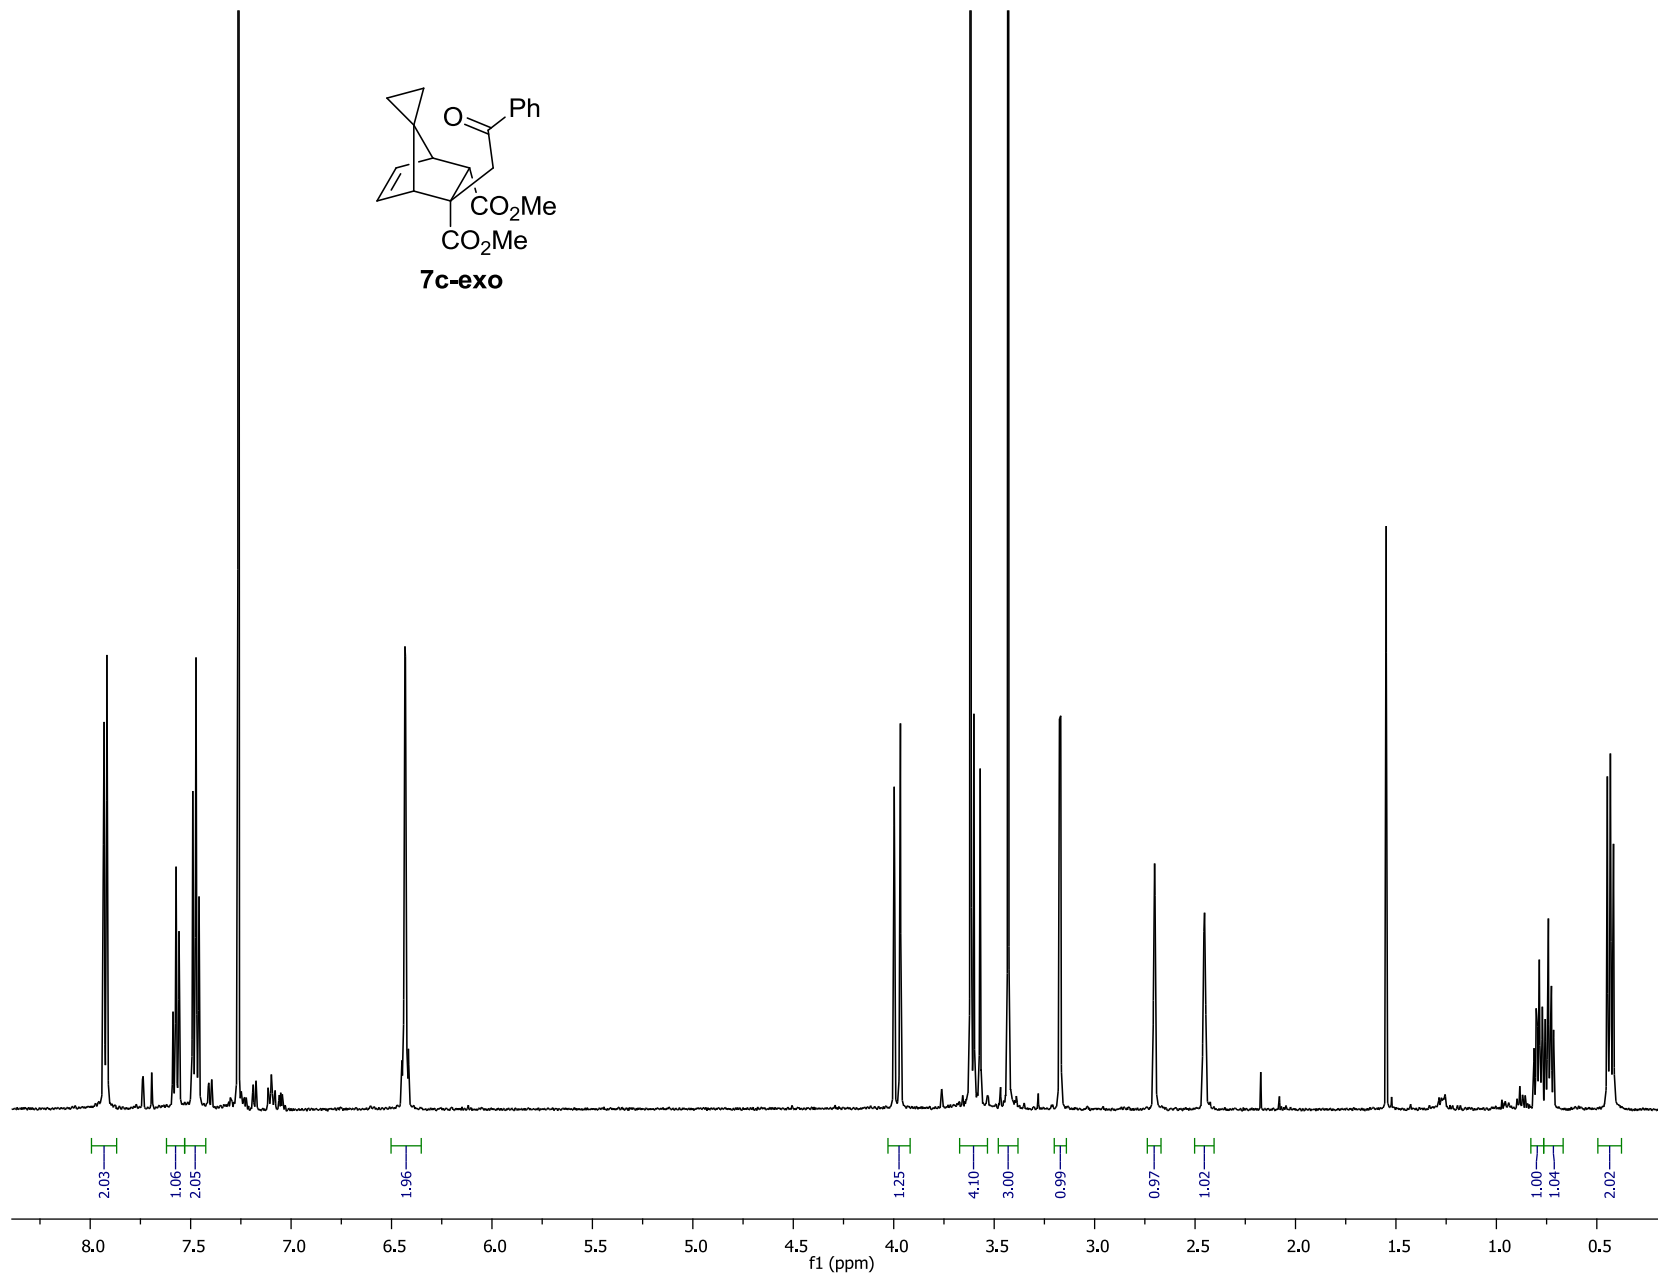

$^{13}\text{C}$  NMR (500 MHz,  $\text{CDCl}_3$ ):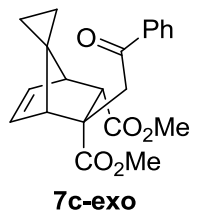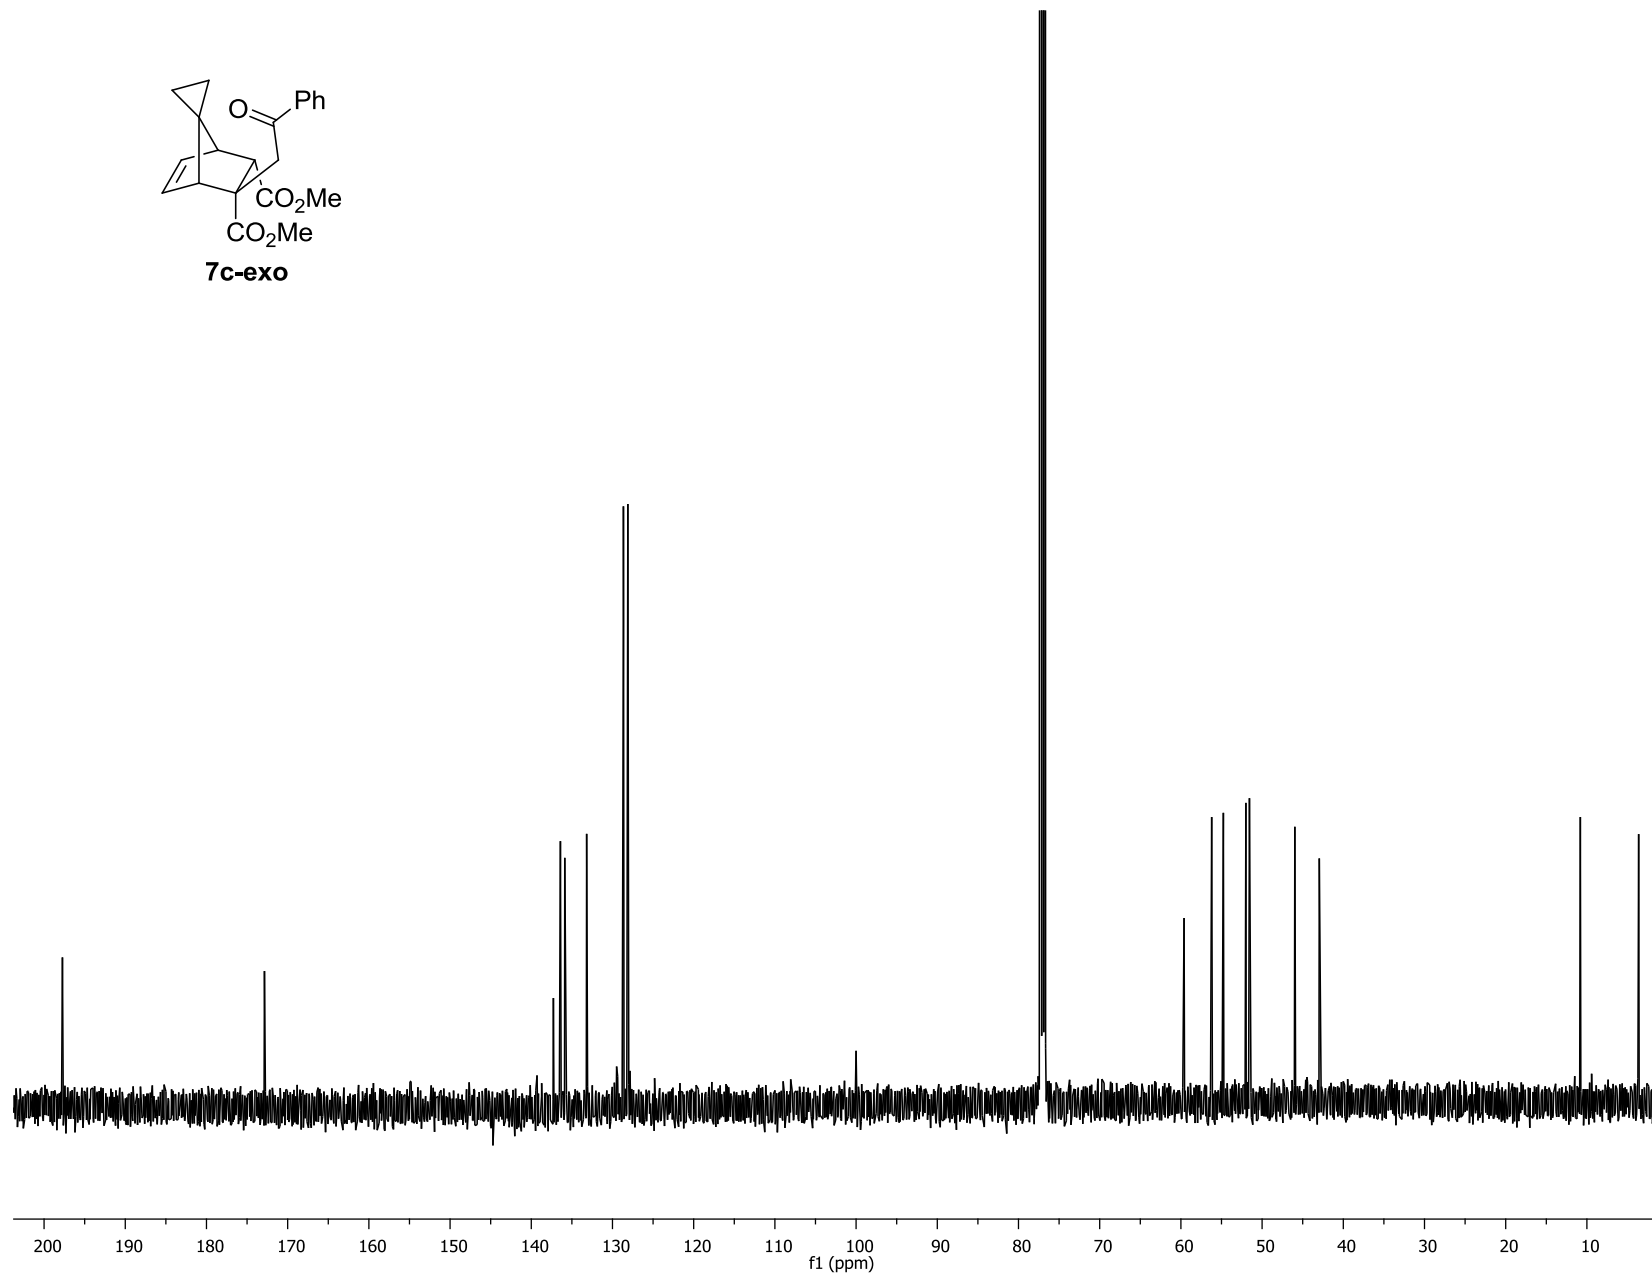

$^1\text{H}$  NMR (500 MHz,  $\text{CDCl}_3$ ):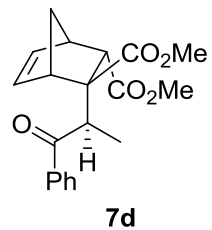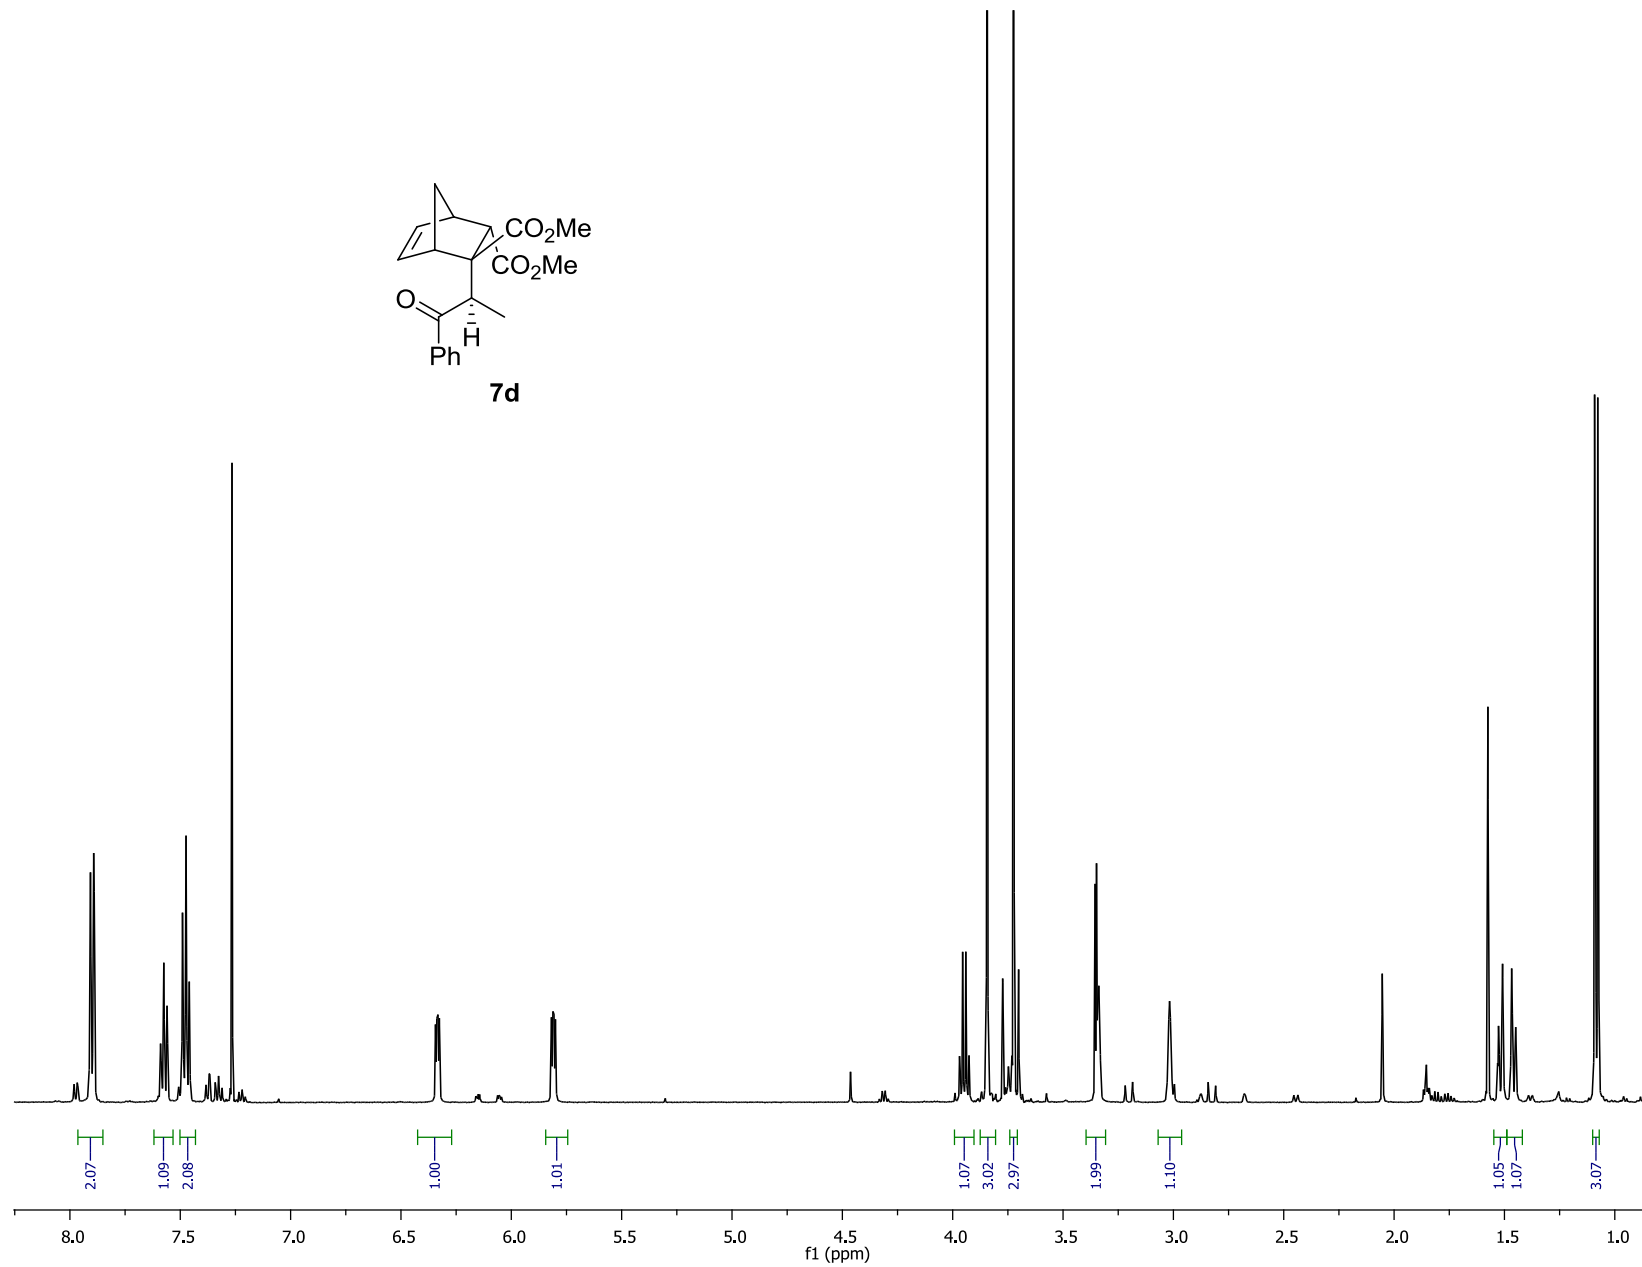

$^1\text{H}$  NMR (500 MHz,  $\text{C}_6\text{D}_6$ ):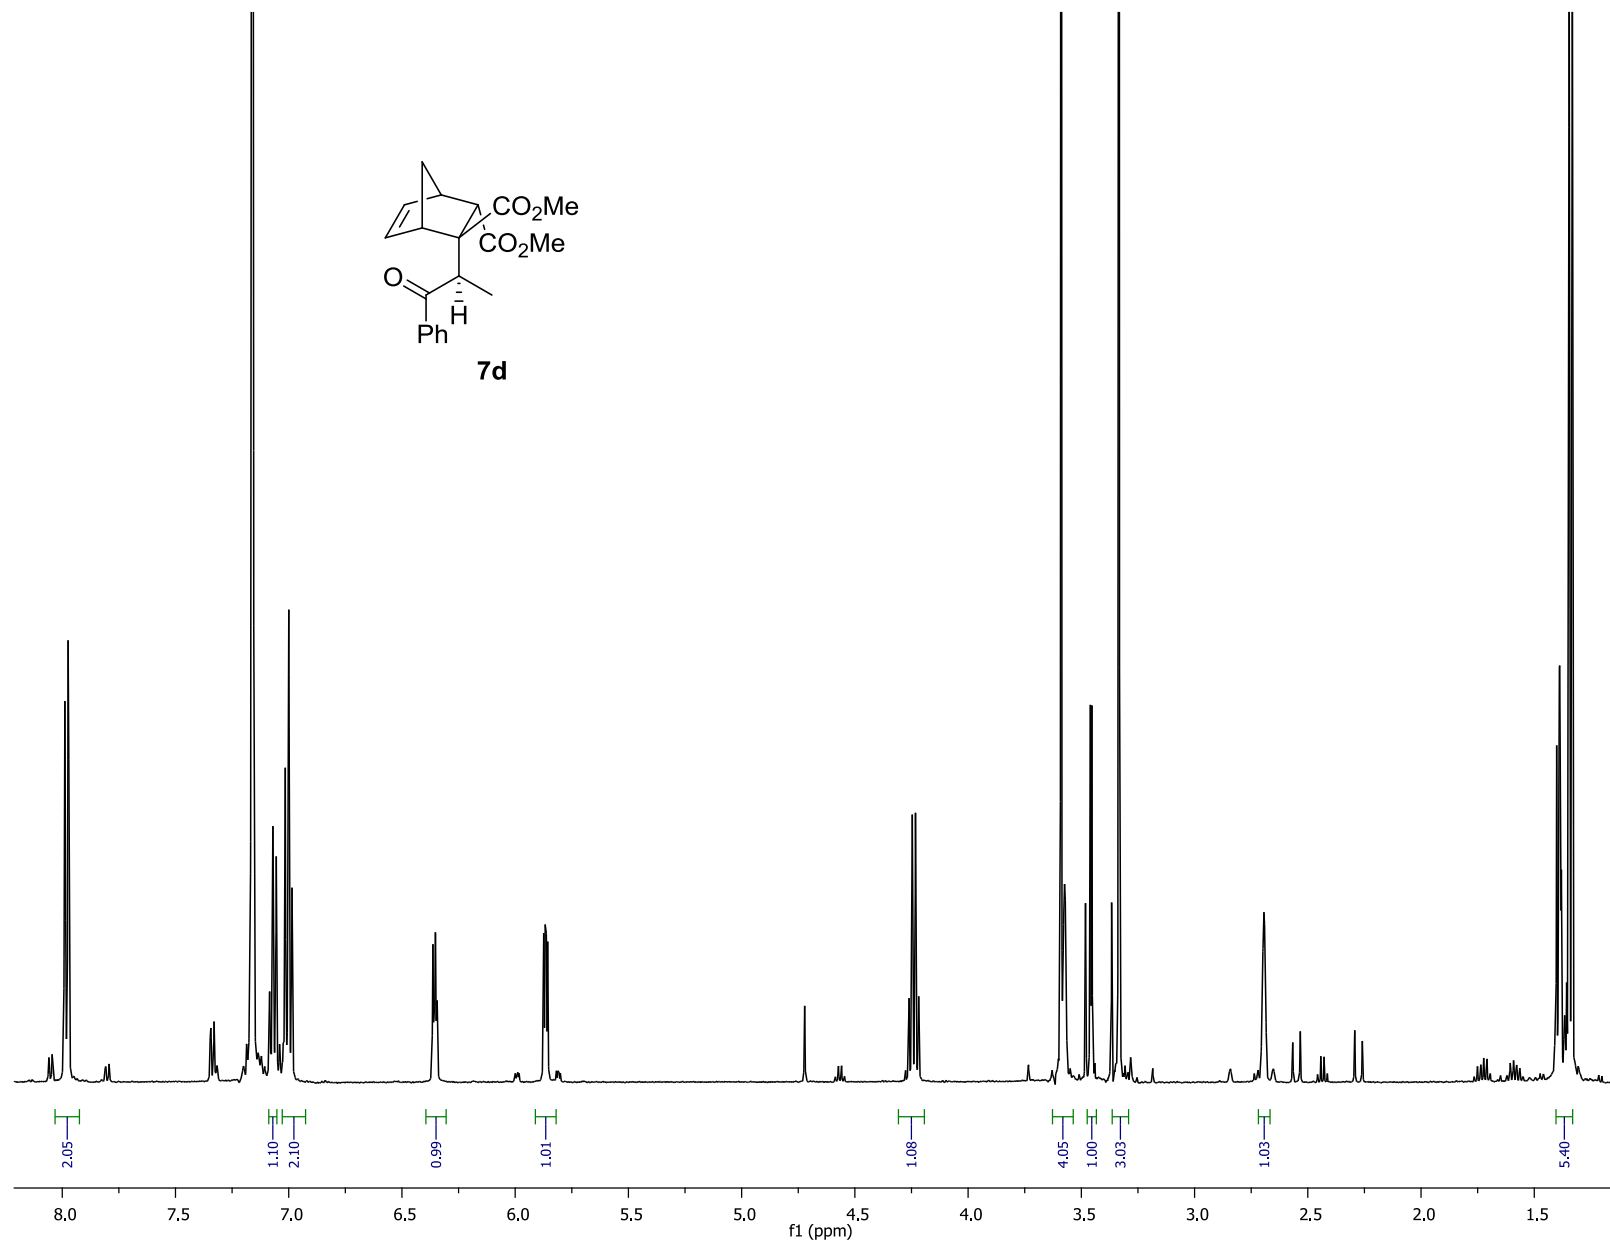

$^{13}\text{C}$  NMR (500 MHz,  $\text{CDCl}_3$ ):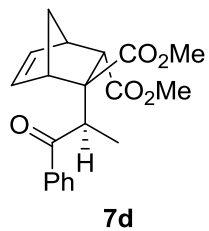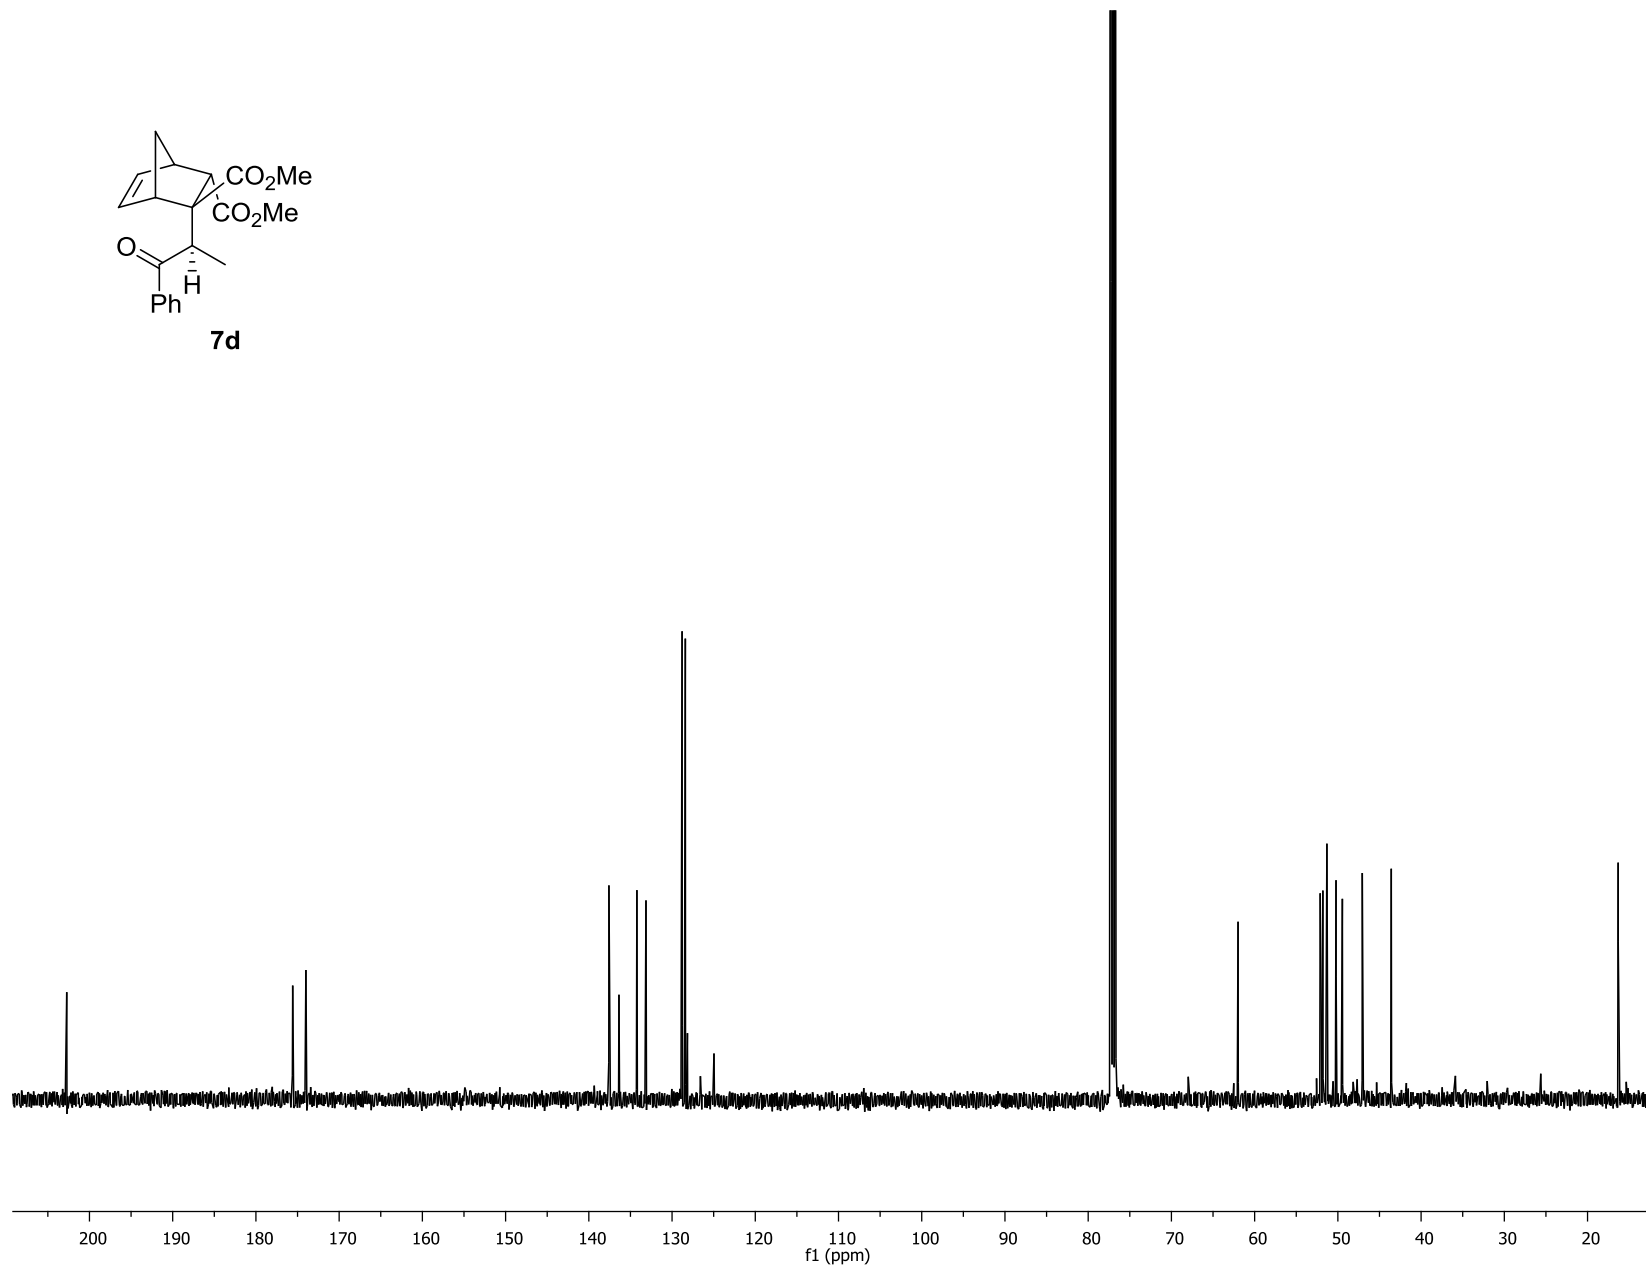



$^1\text{H}$  NMR (500 MHz,  $\text{CDCl}_3$ ):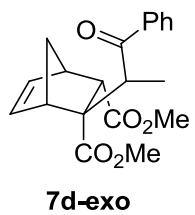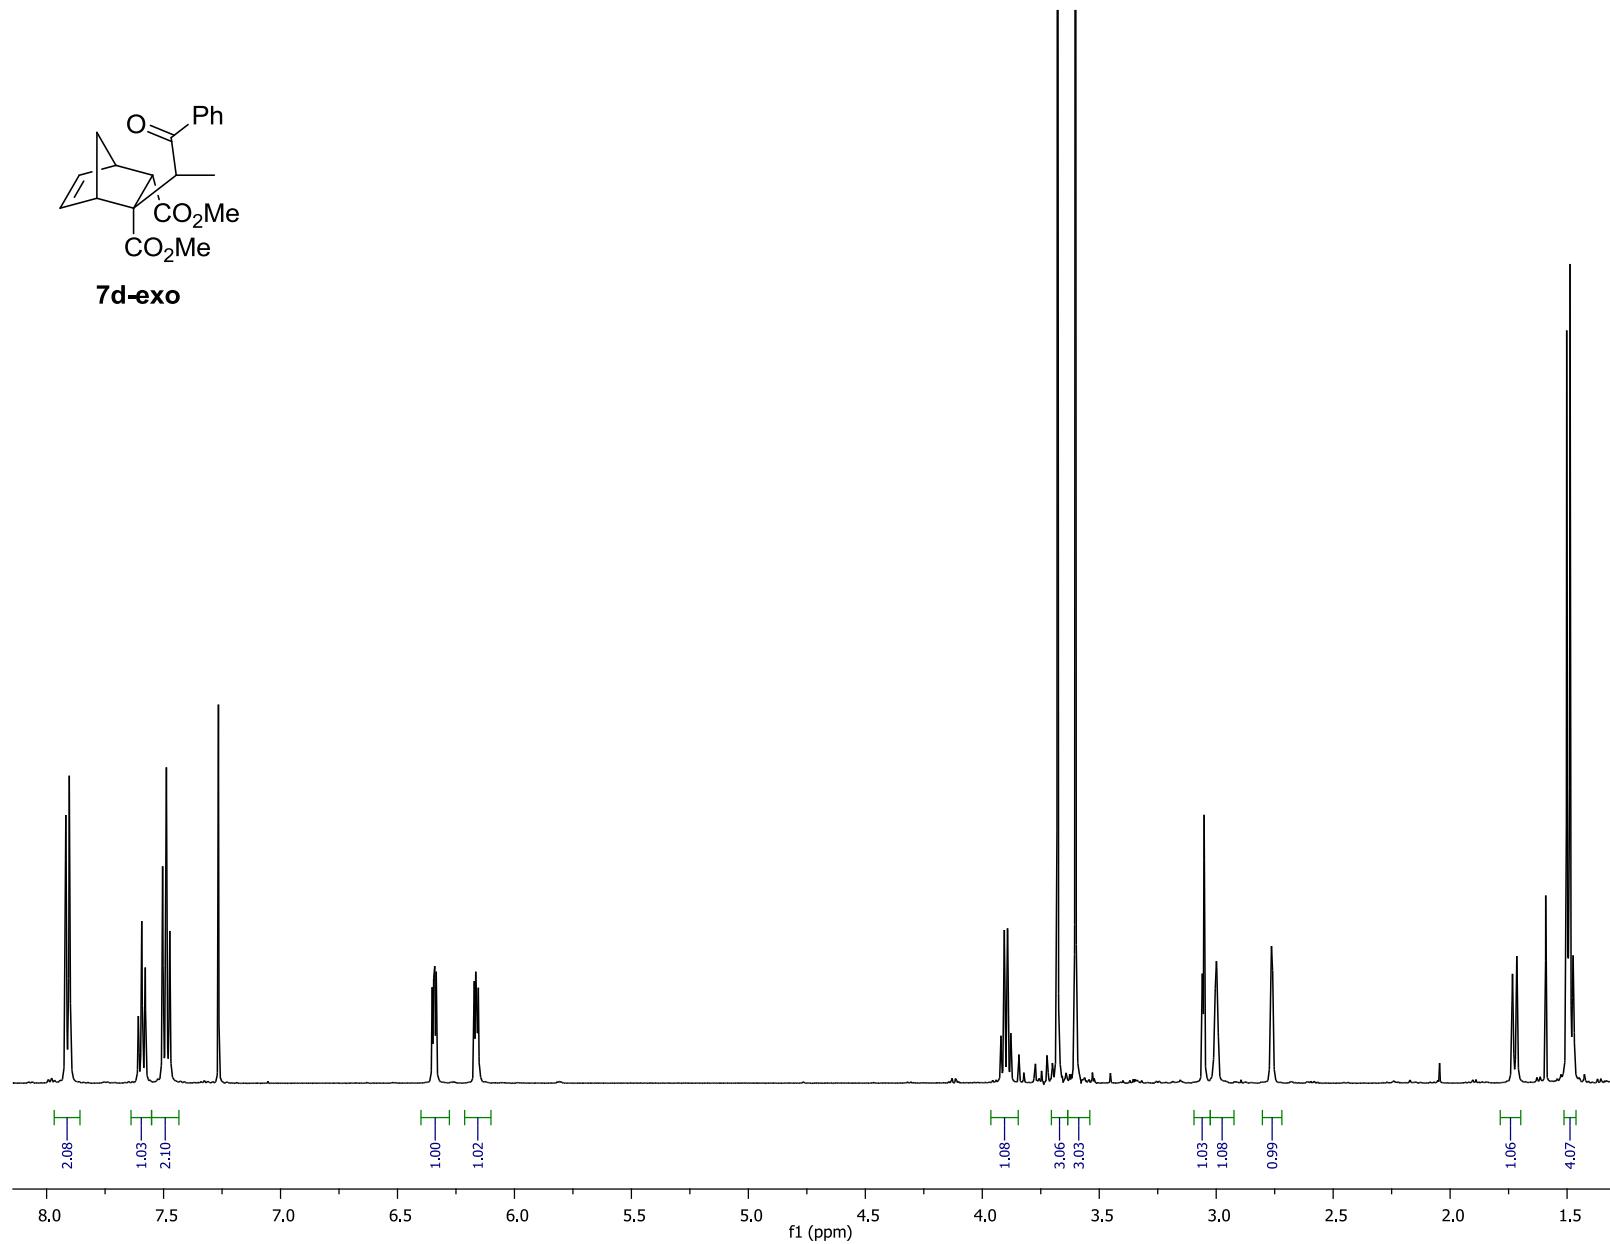

$^{13}\text{C}$  NMR (500 MHz,  $\text{CDCl}_3$ ):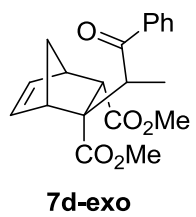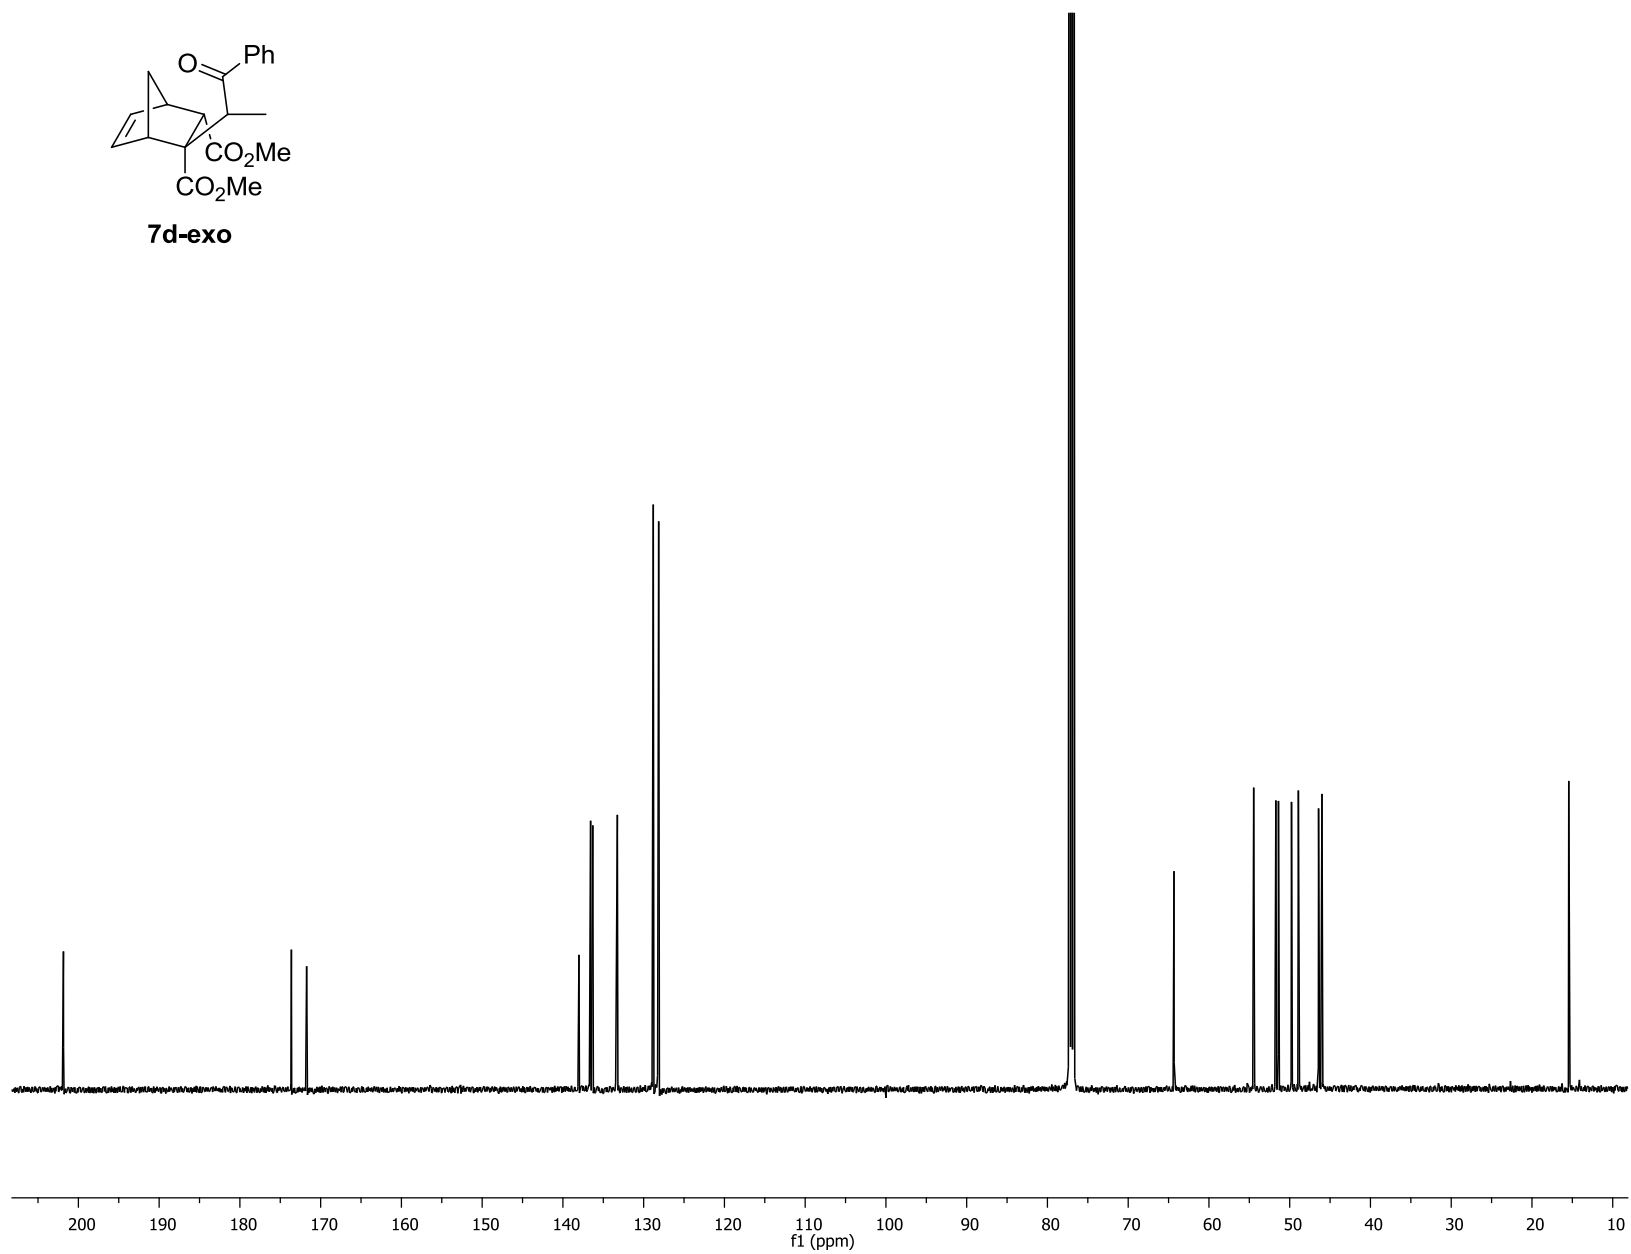

$^1\text{H}$  NMR (500 MHz,  $\text{CDCl}_3$ ):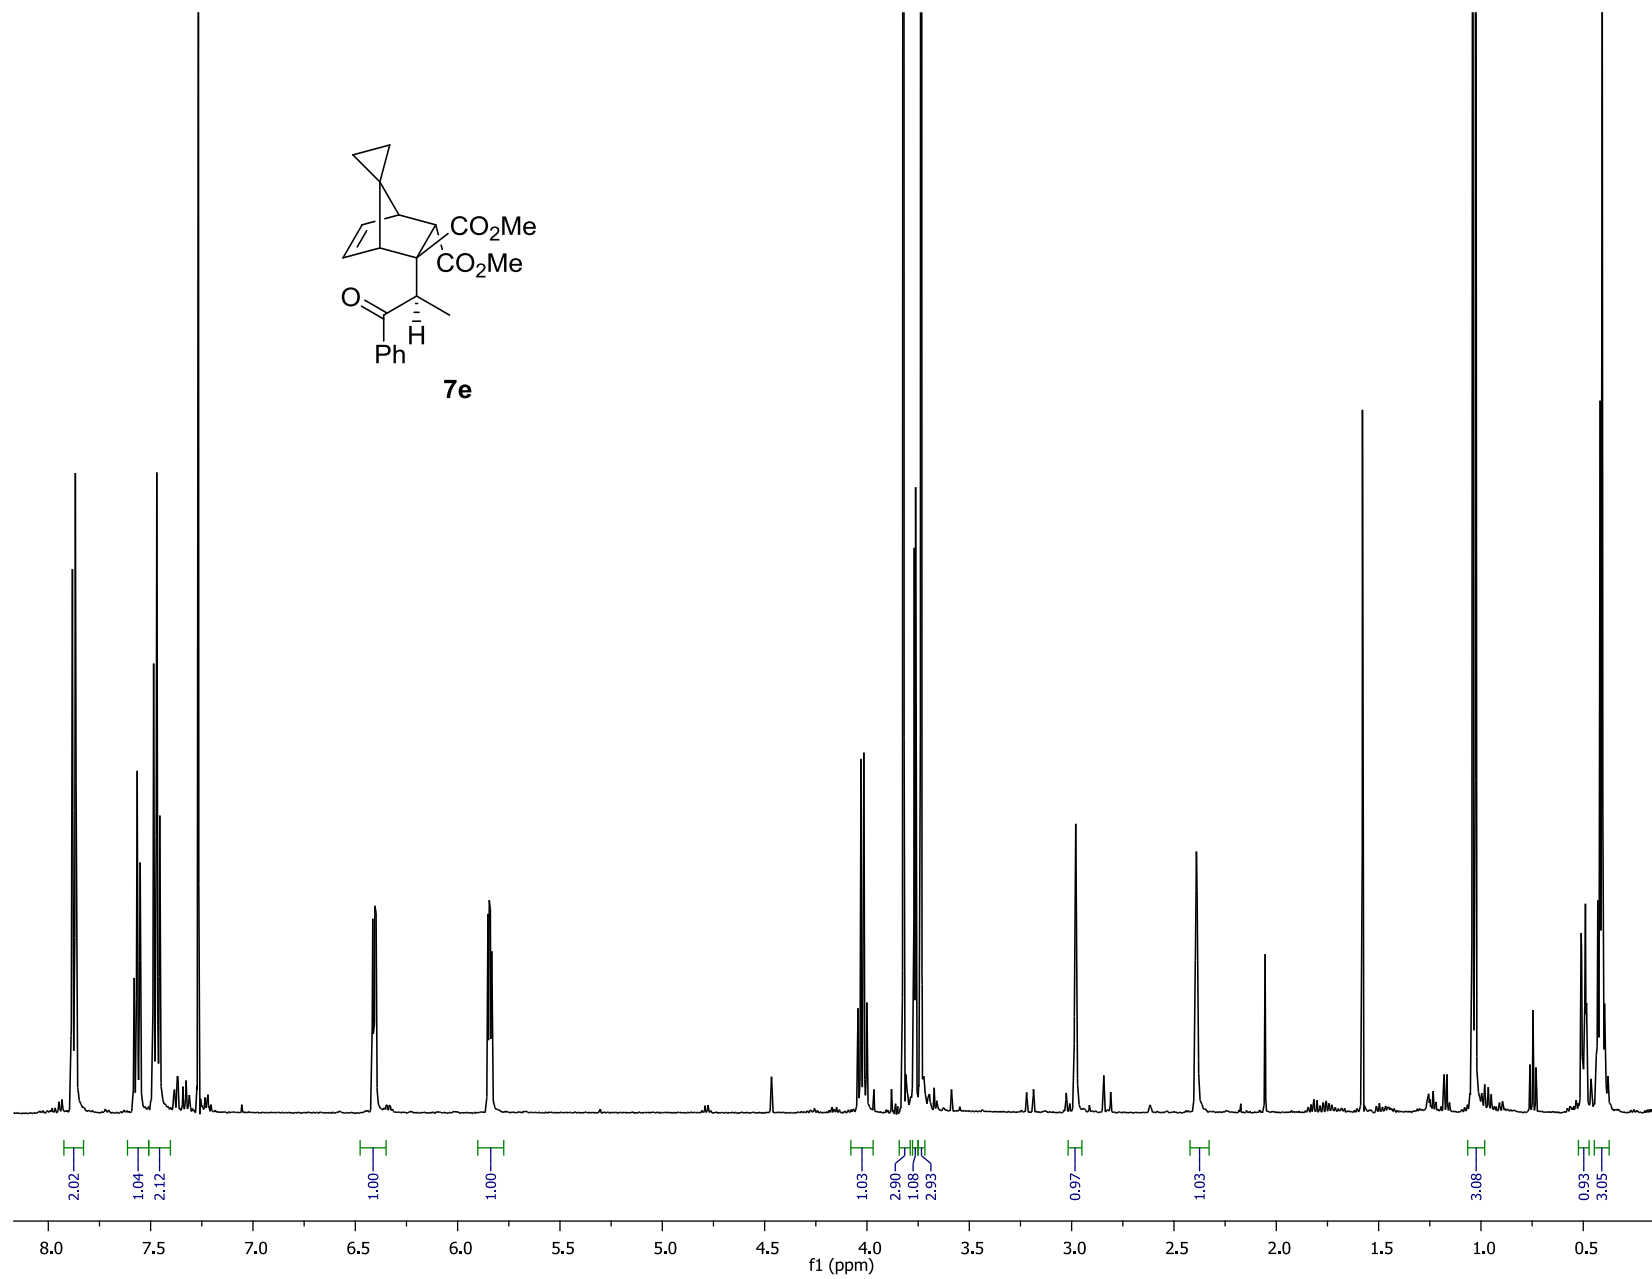

$^{13}\text{C}$  NMR (500 MHz,  $\text{CDCl}_3$ ):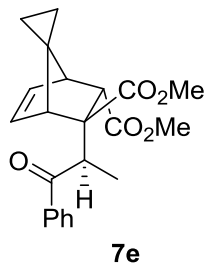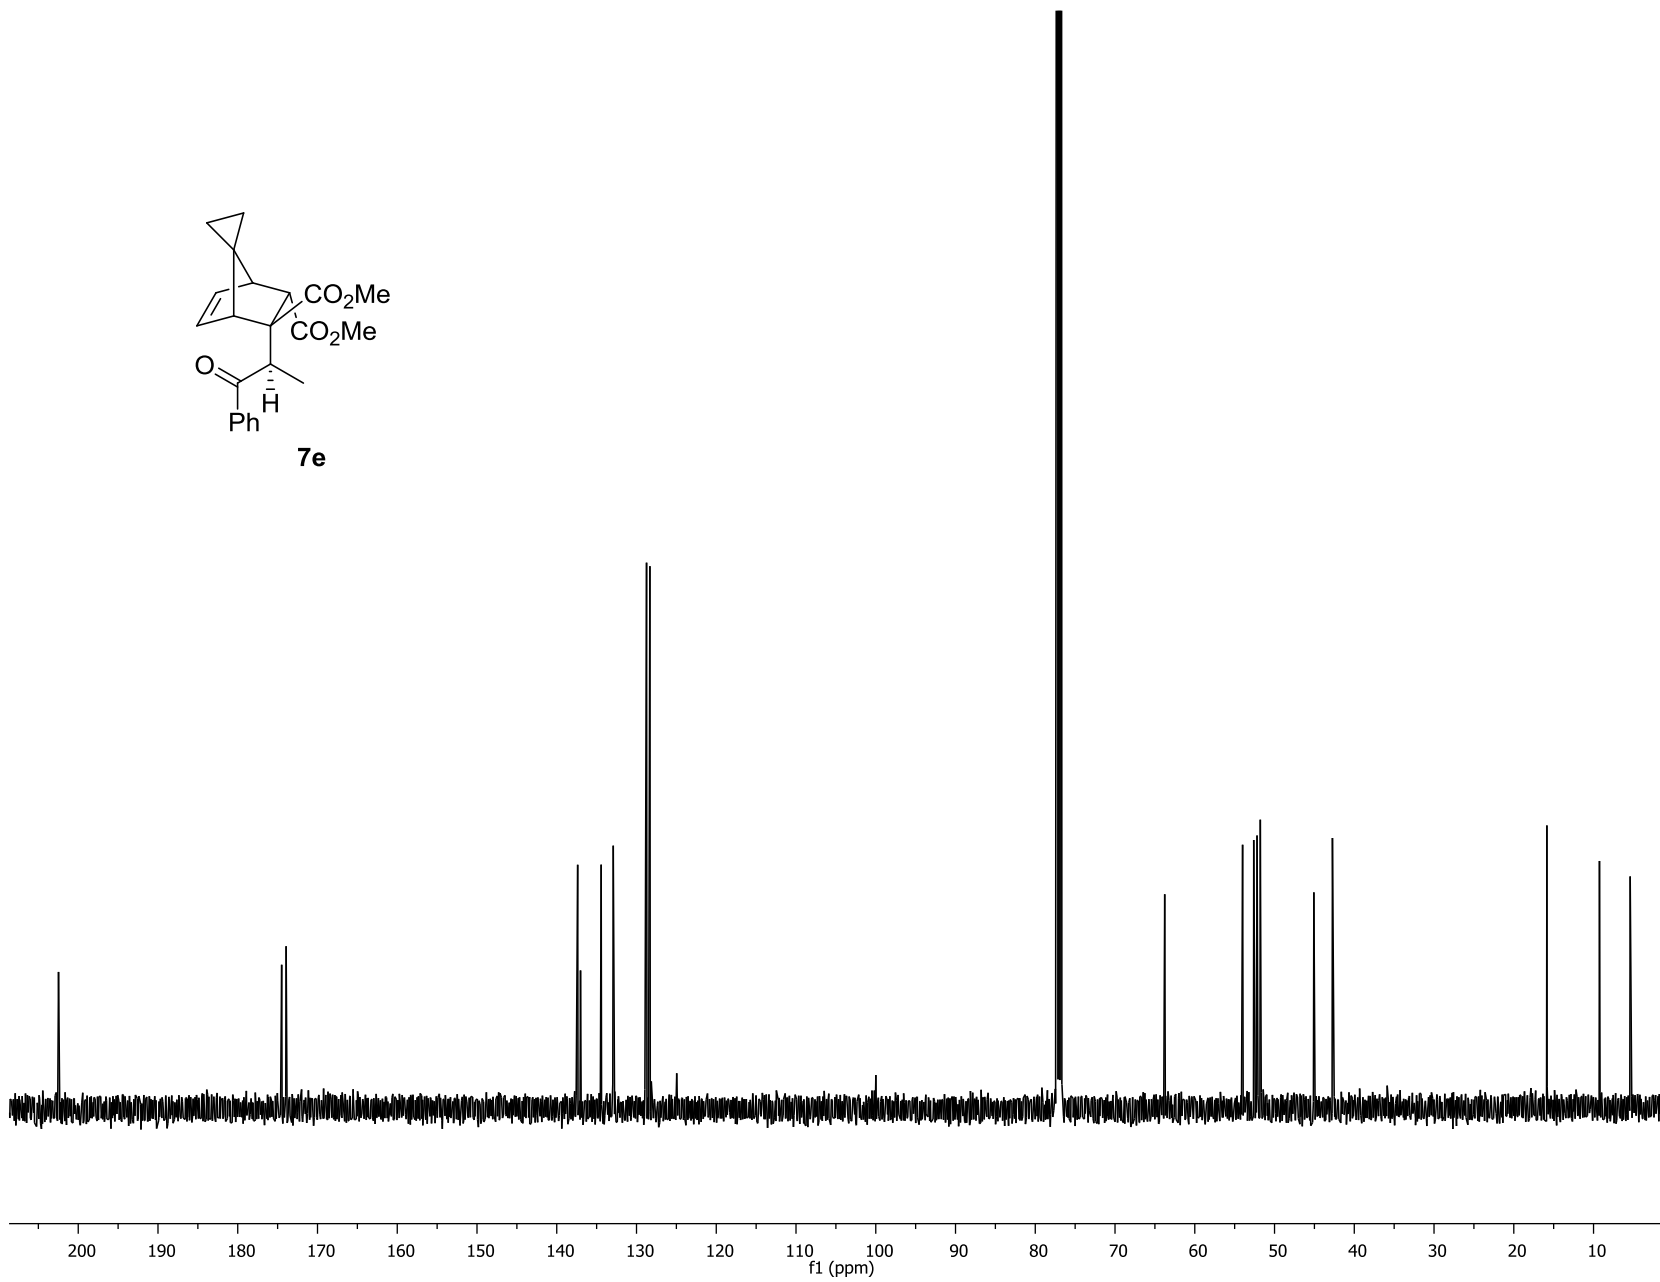

$^1\text{H}$  NMR (500 MHz,  $\text{CDCl}_3$ ):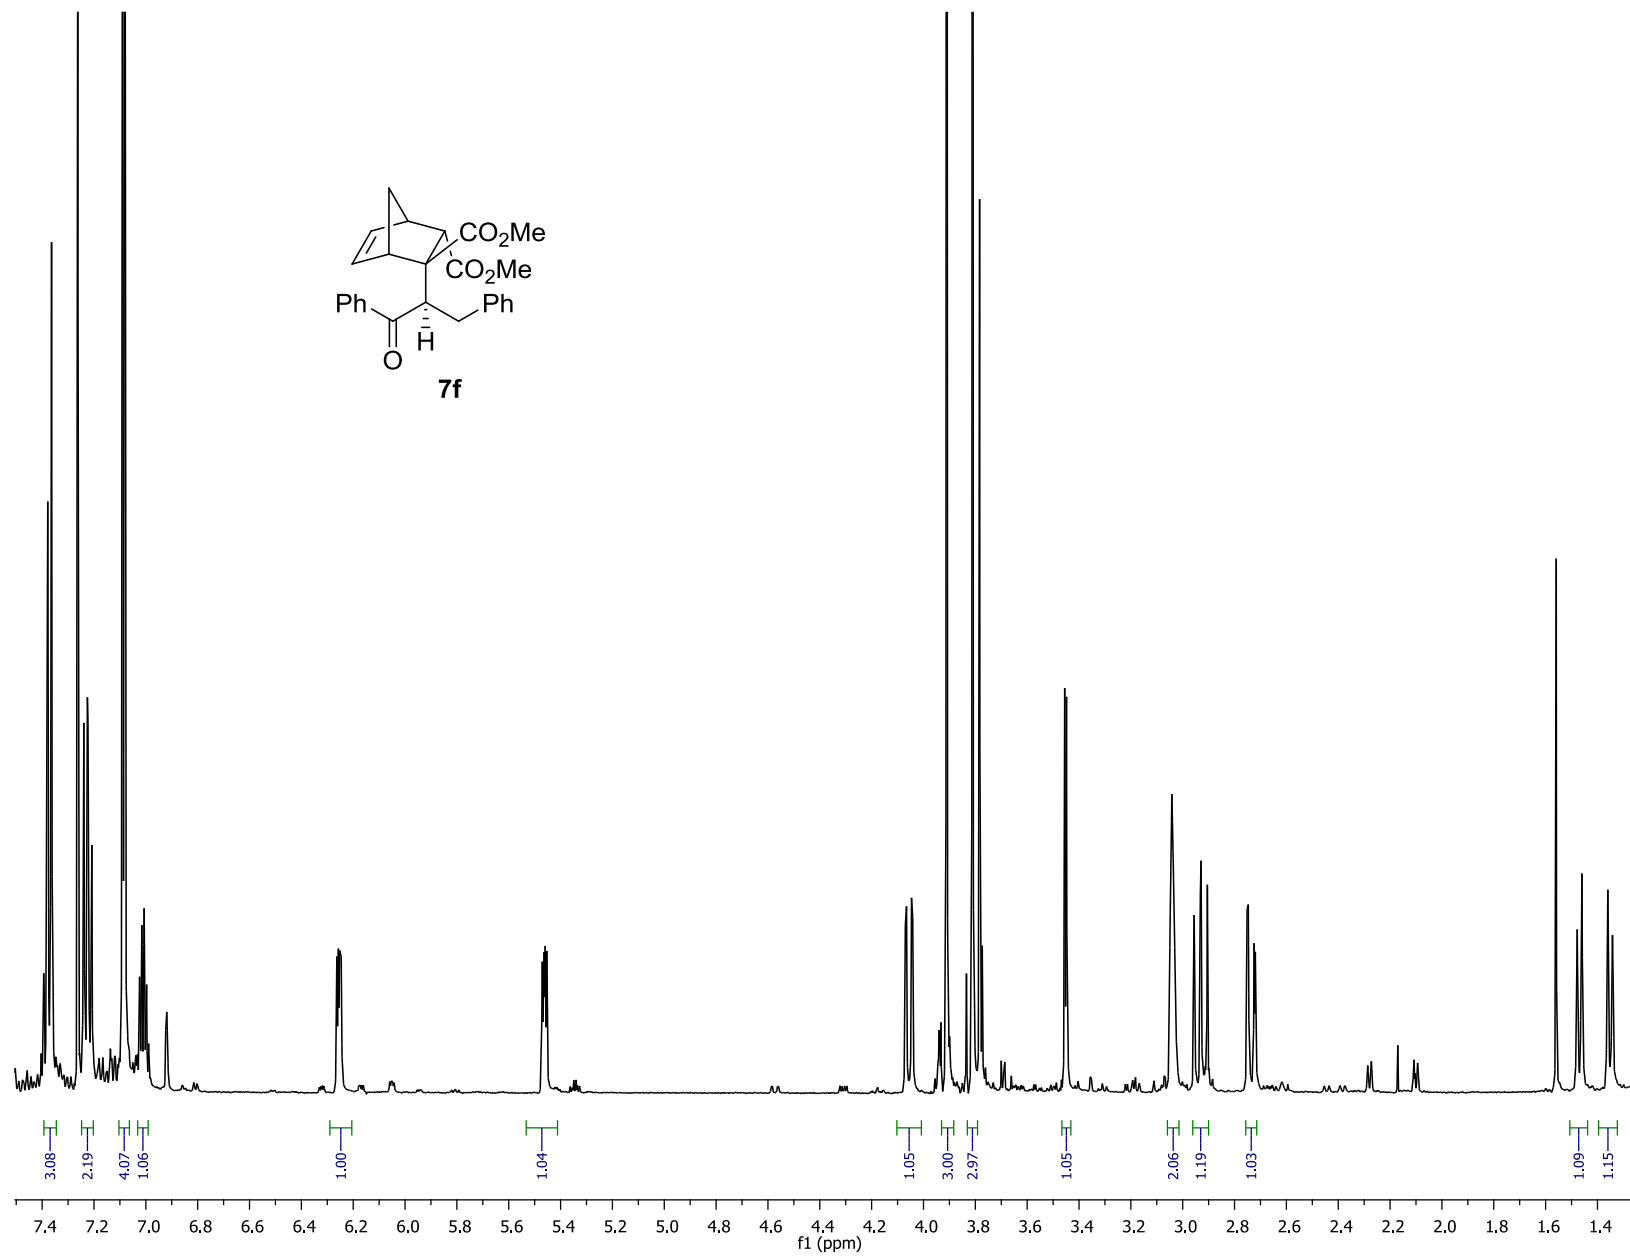

$^1\text{H}$  NMR (500 MHz,  $\text{C}_6\text{D}_6$ ):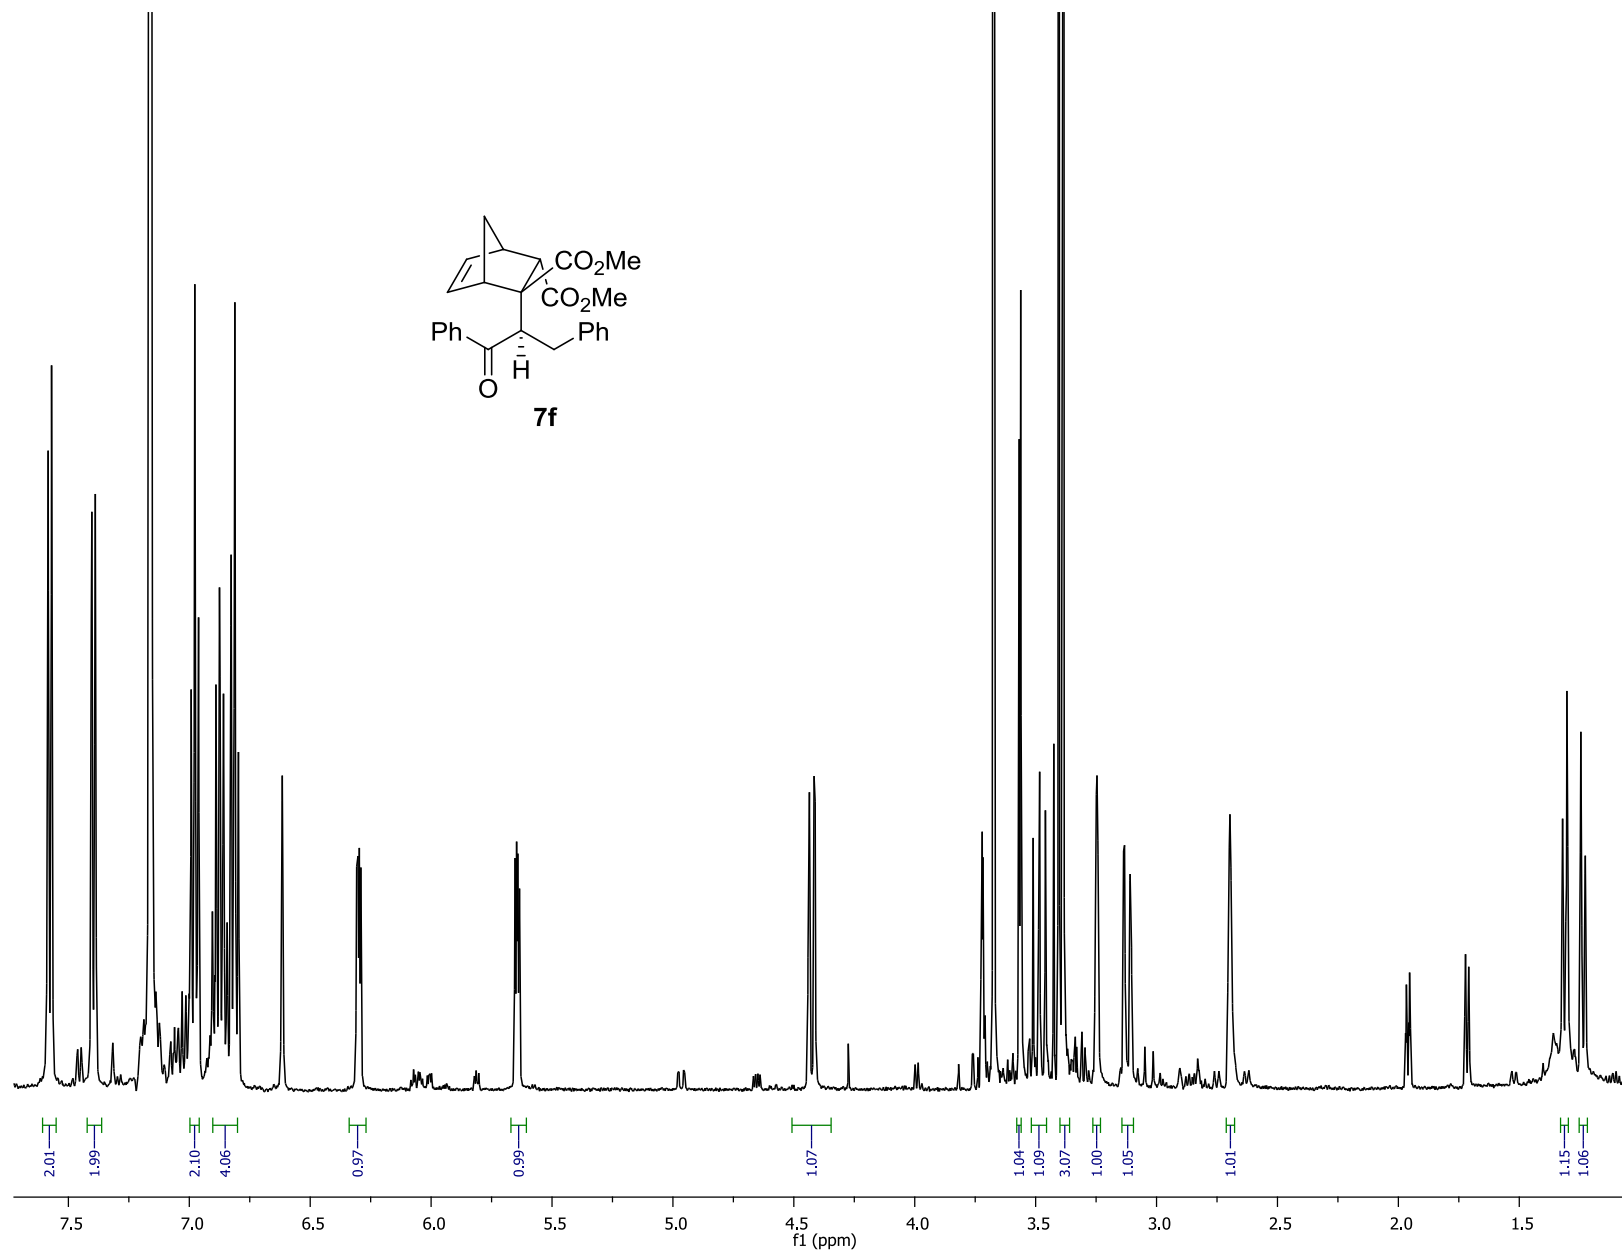

$^{13}\text{C}$  NMR (500 MHz,  $\text{CDCl}_3$ ):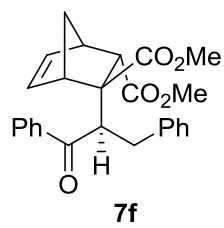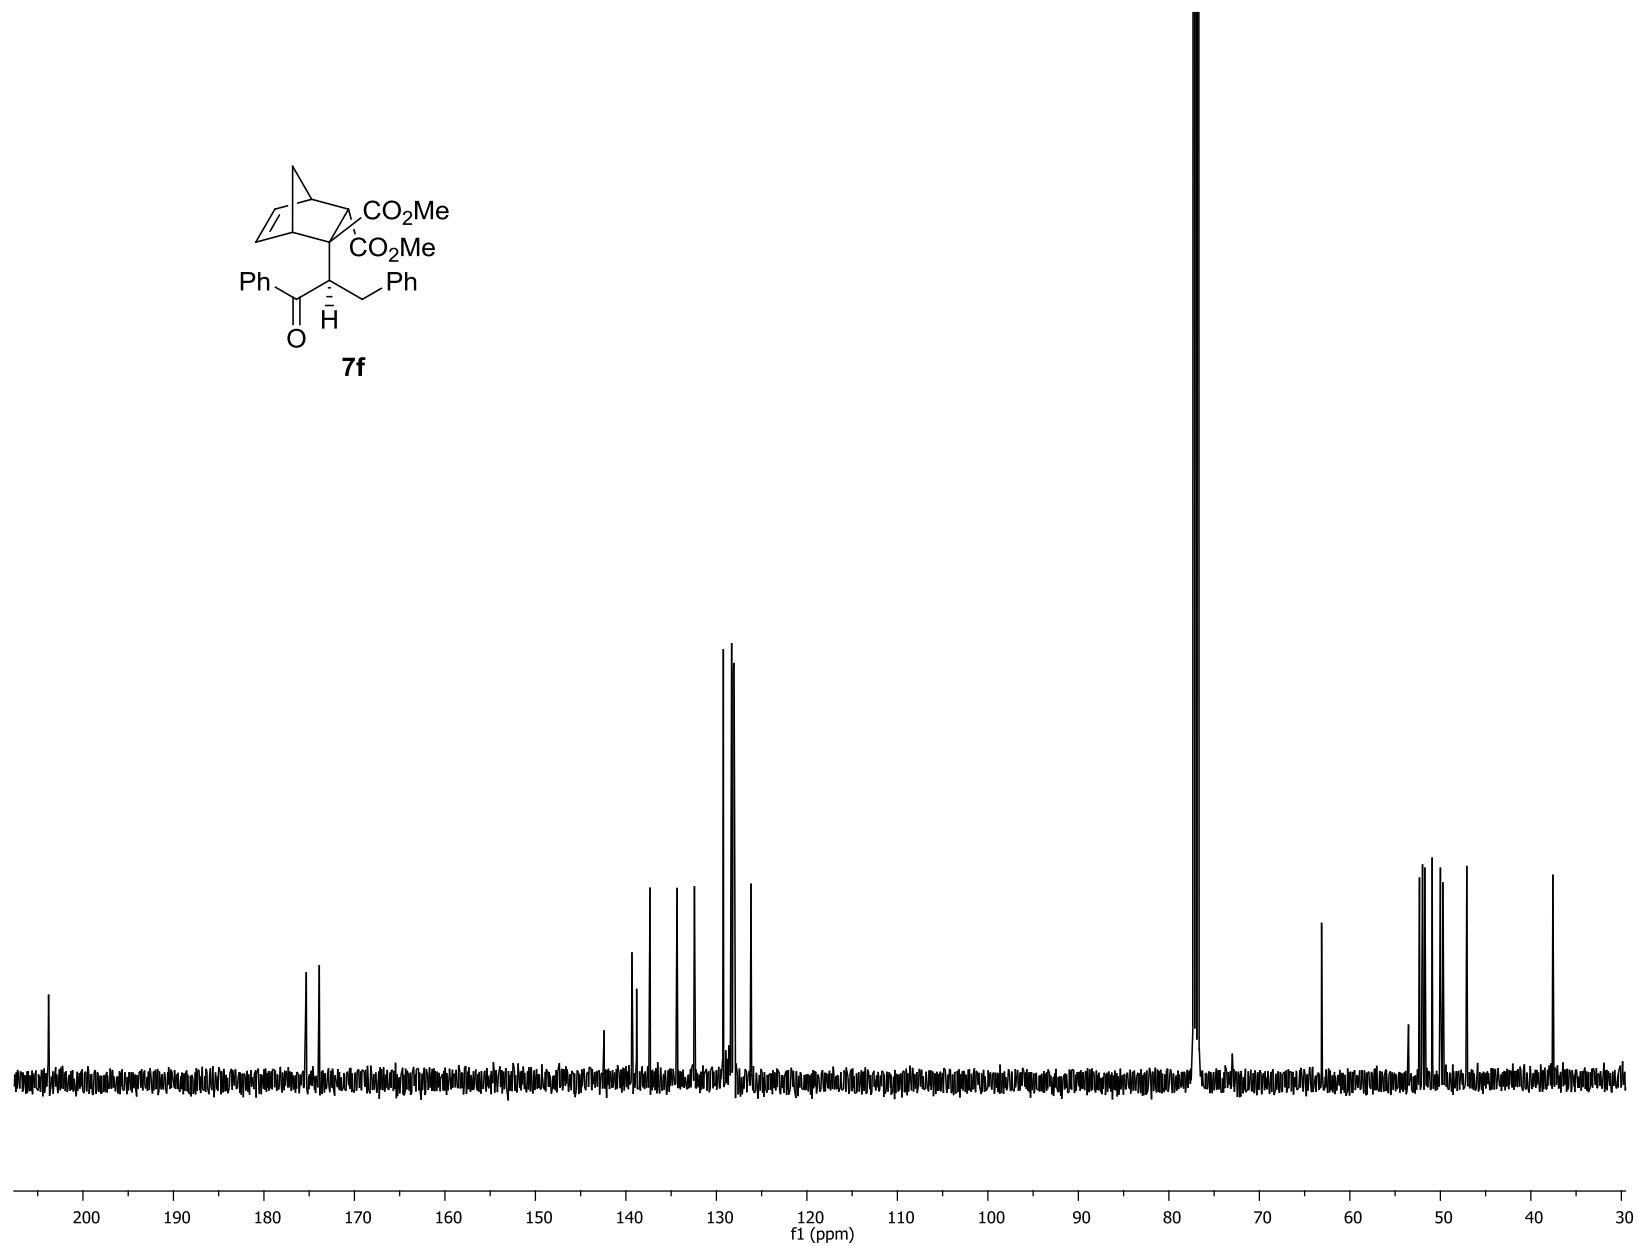

COSY (500 MHz, CDCl<sub>3</sub>):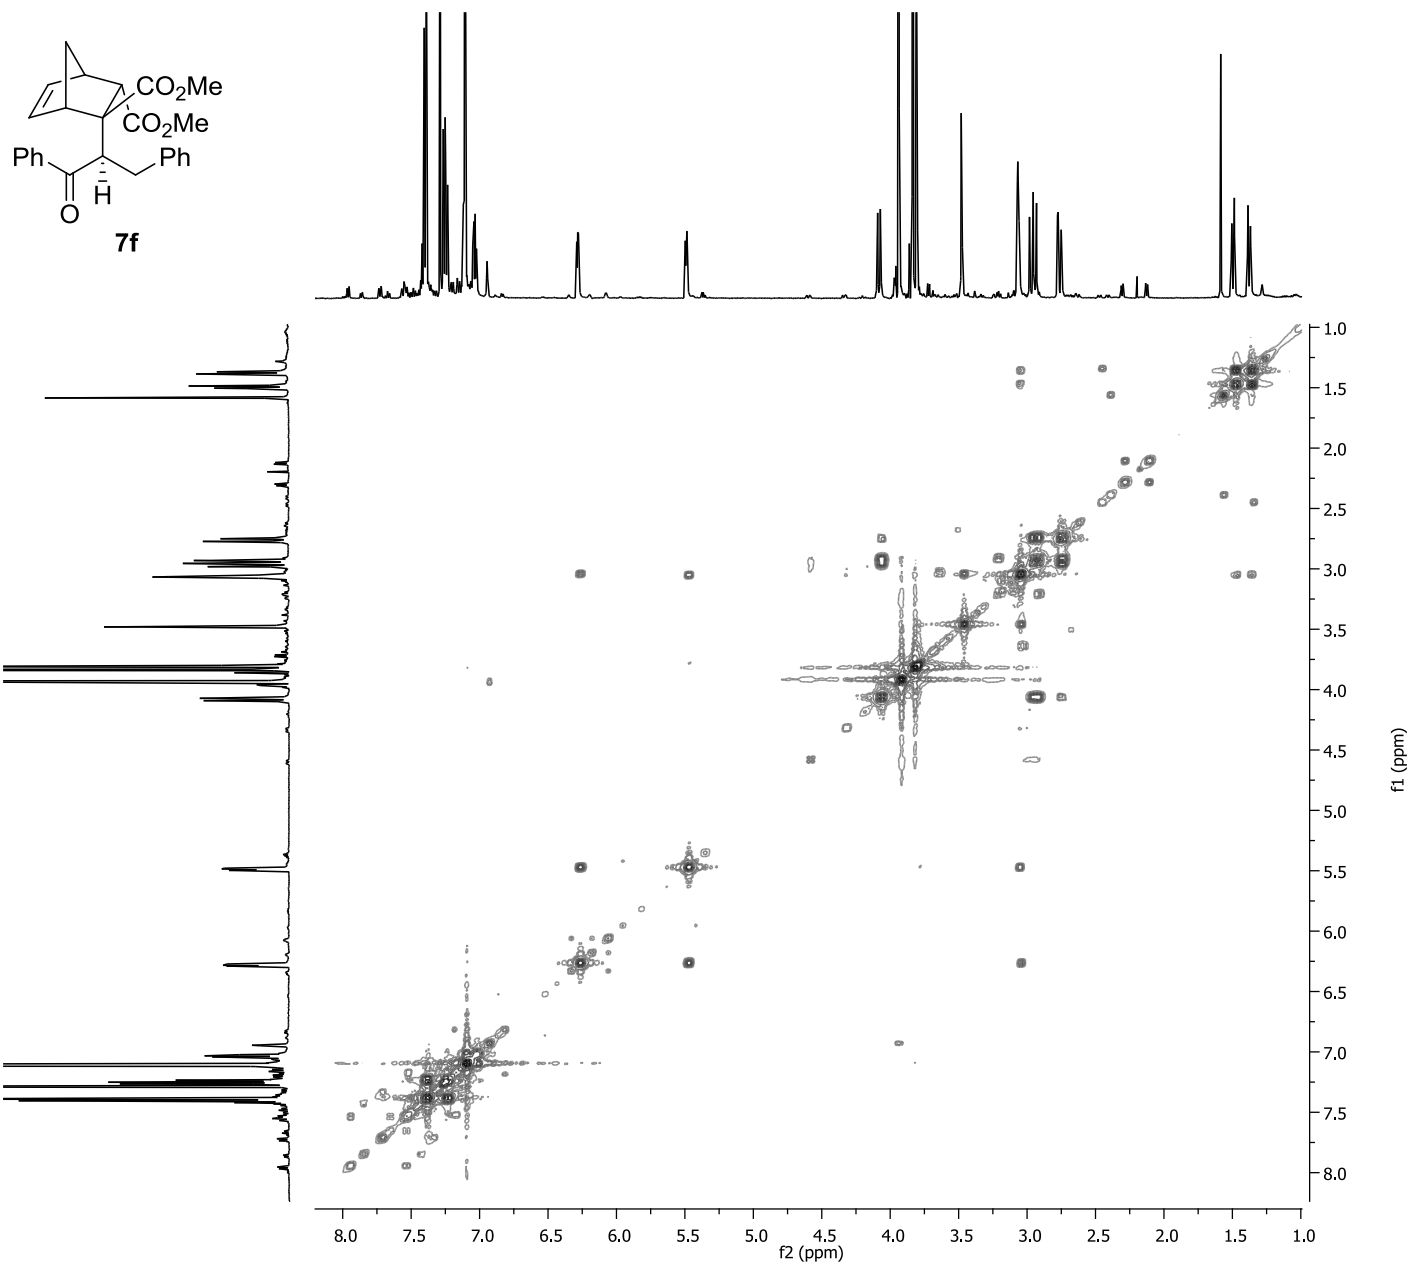



$^1\text{H}$  NMR (500 MHz,  $\text{CDCl}_3$ ):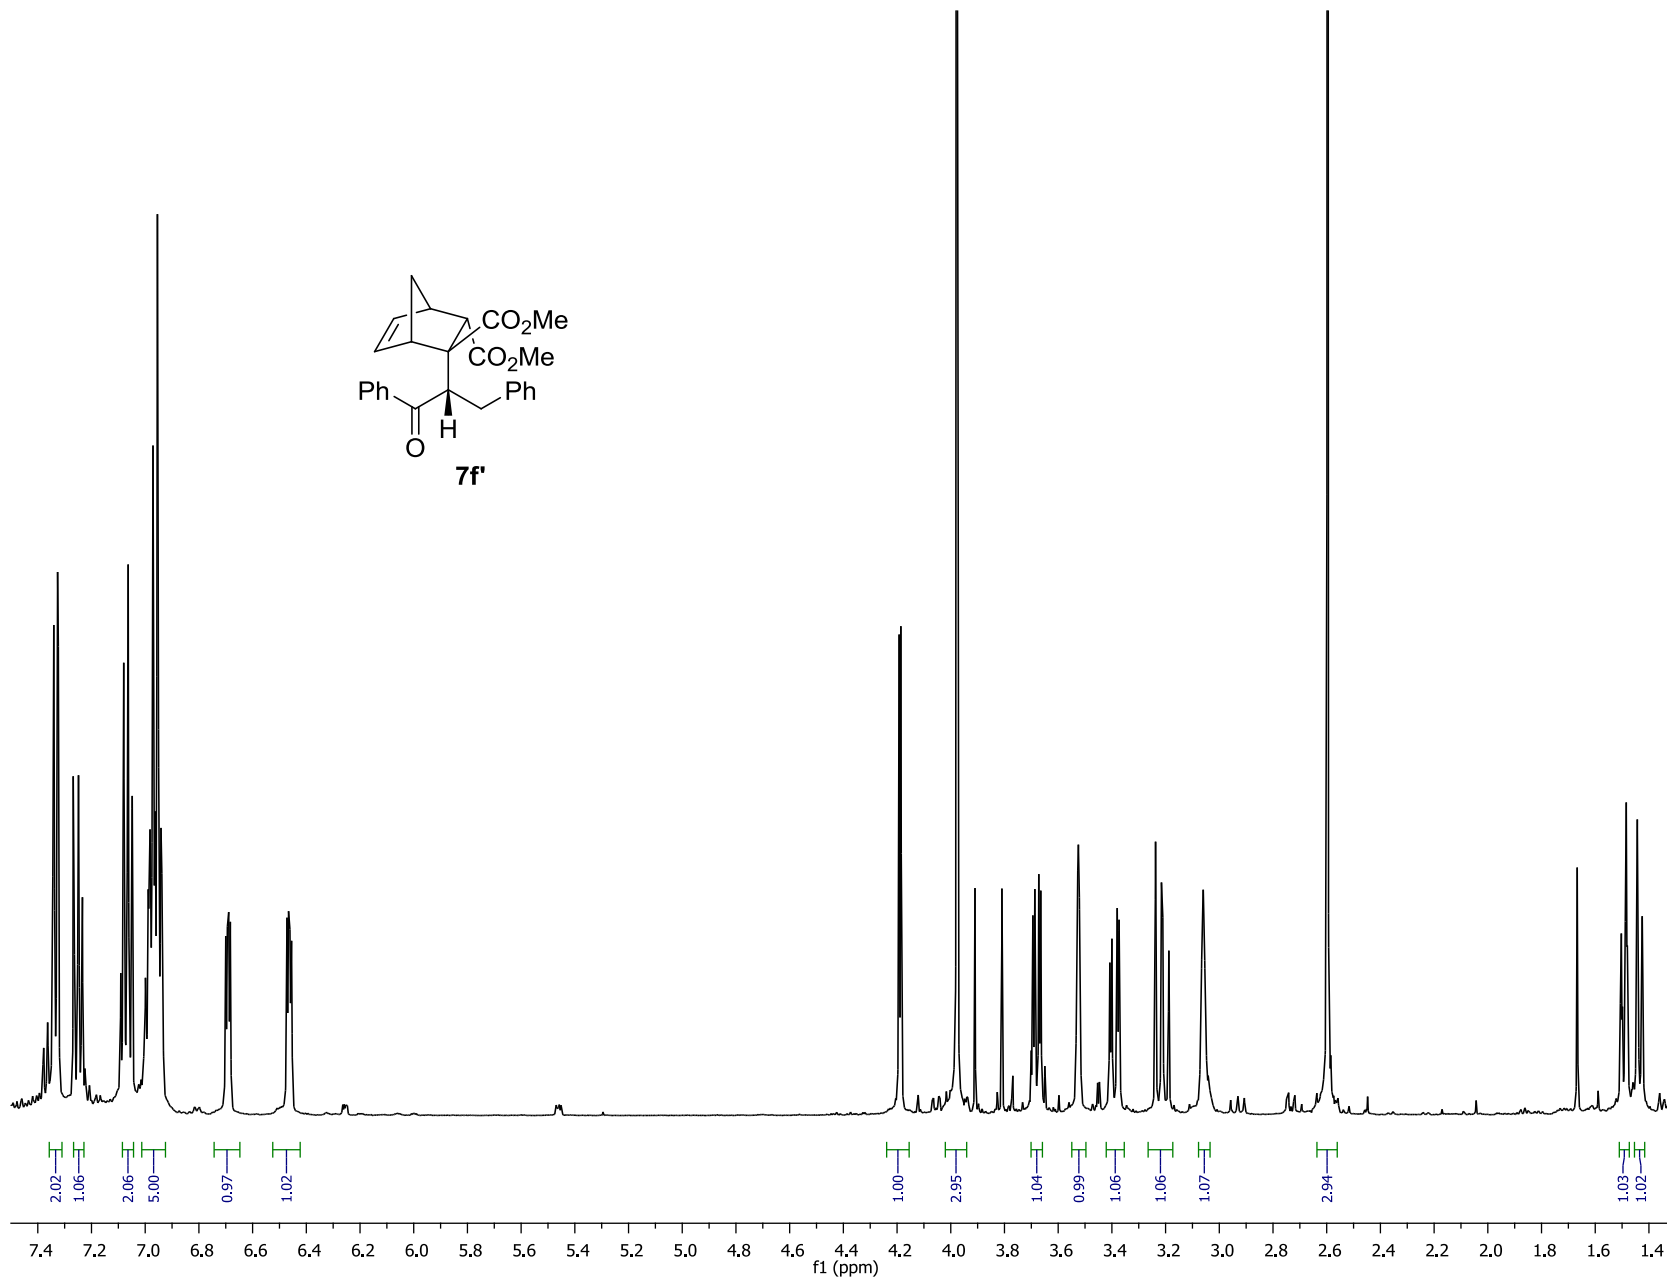

$^1\text{H}$  NMR (500 MHz,  $\text{C}_6\text{D}_6$ ):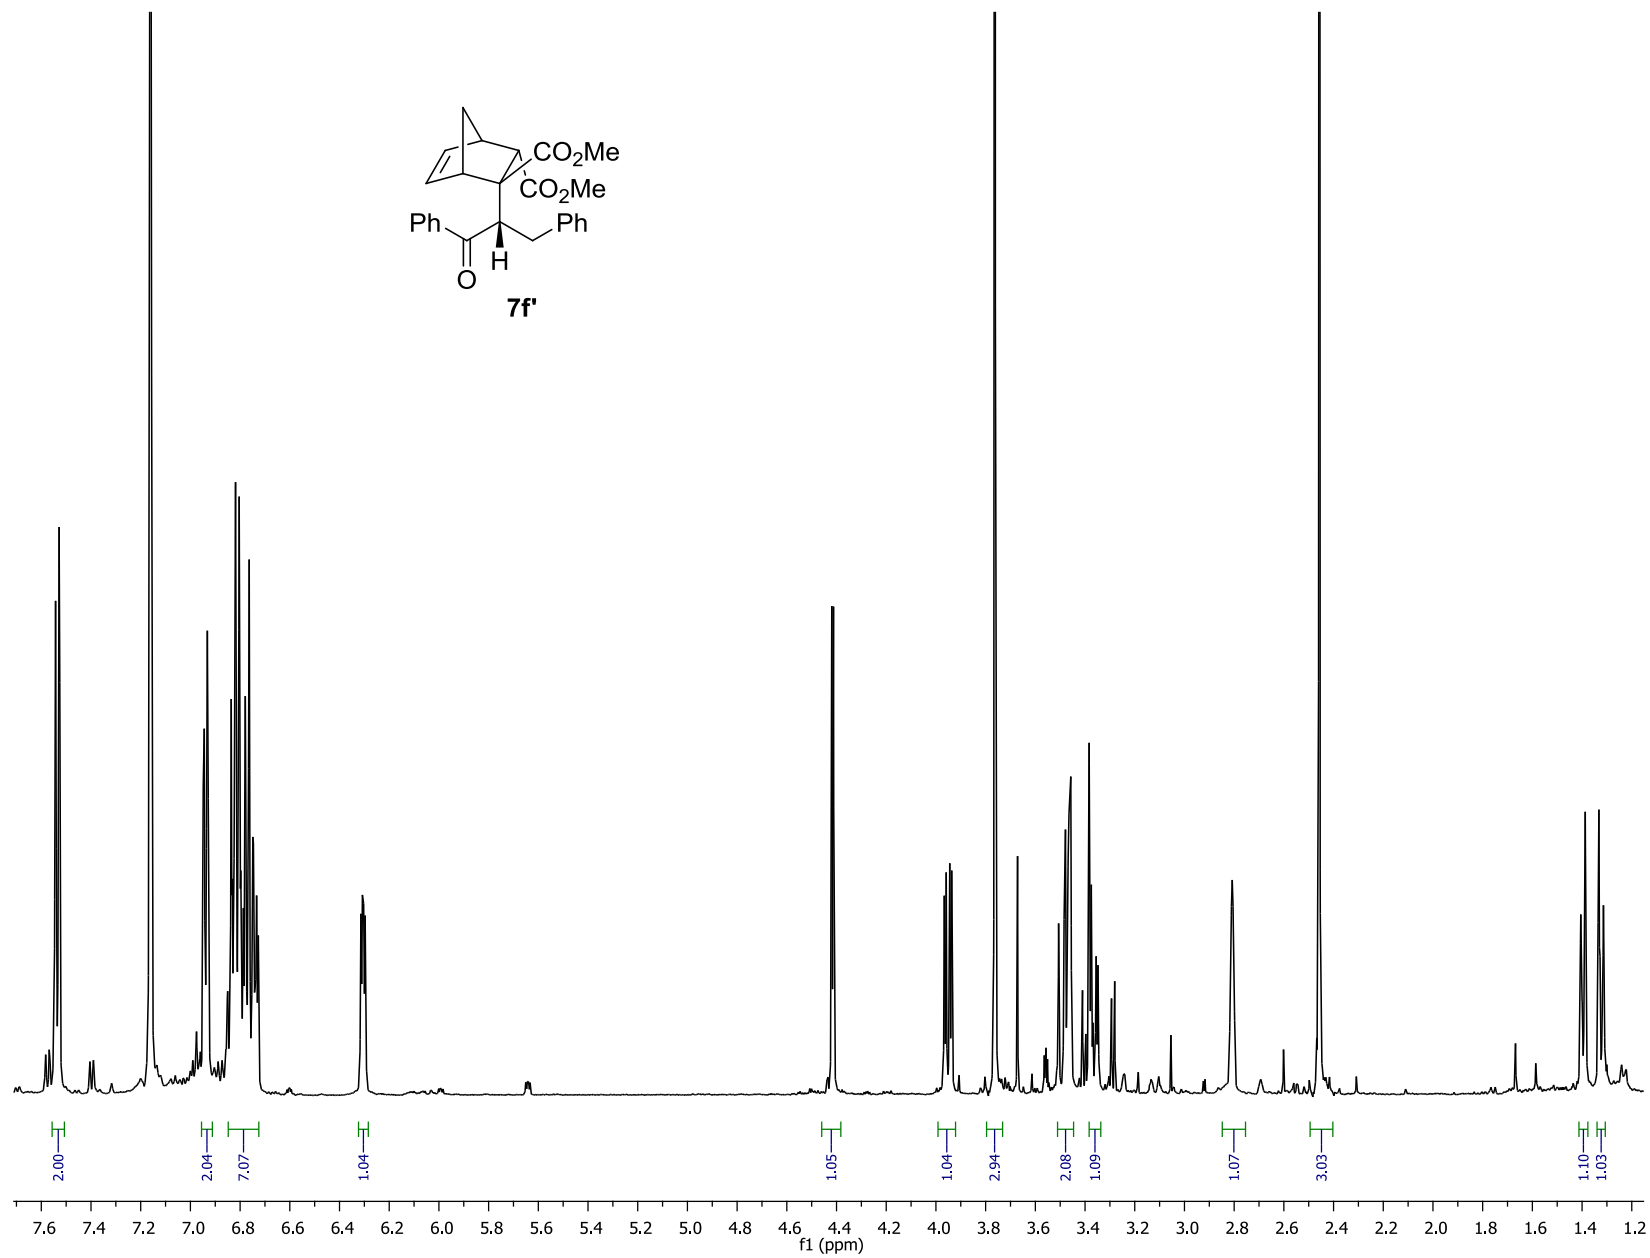

$^{13}\text{C}$  NMR (500 MHz,  $\text{CDCl}_3$ ):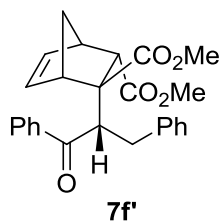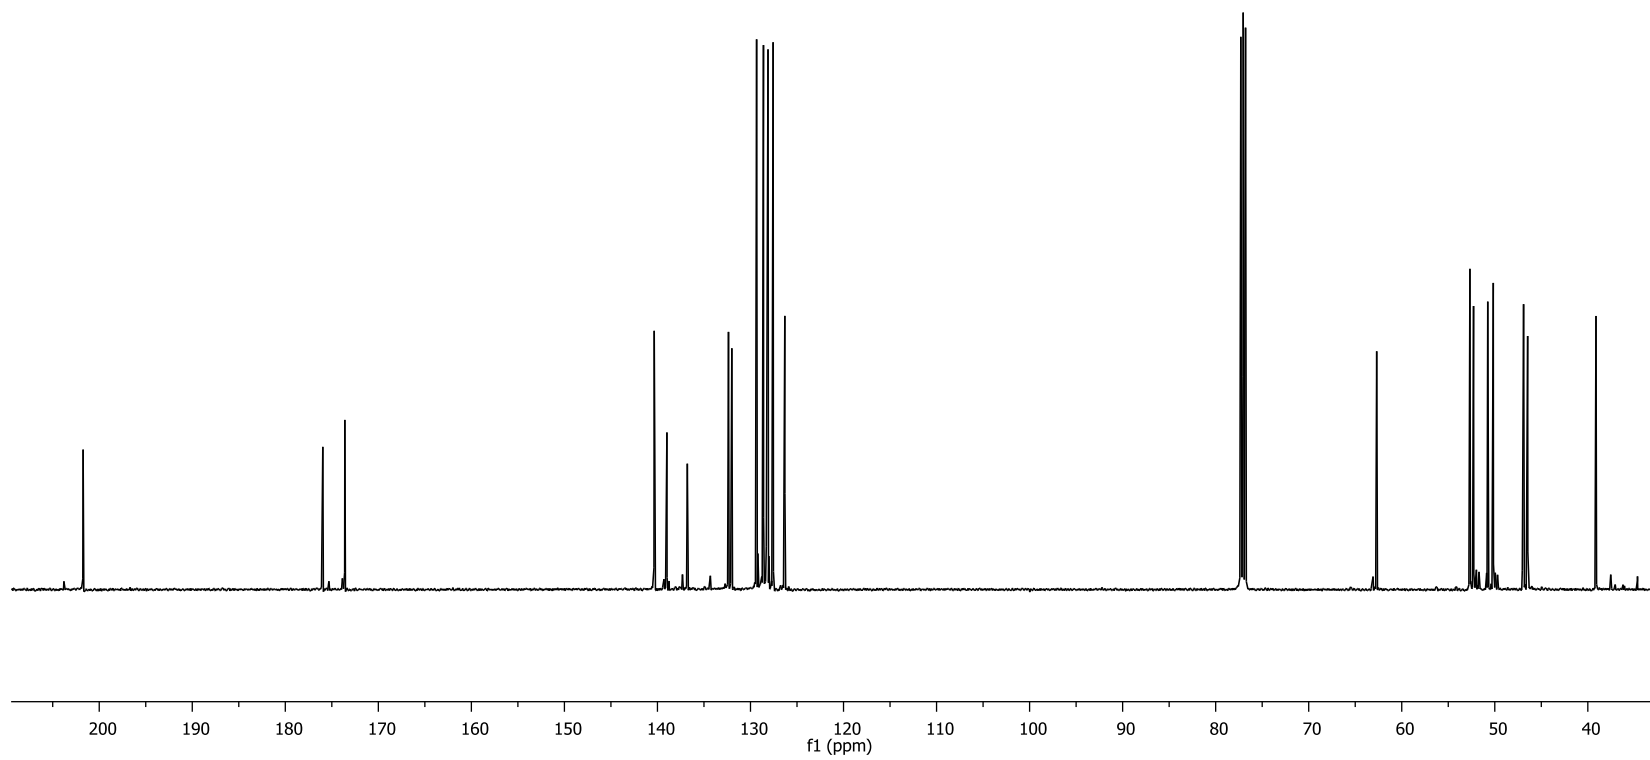

COSY (500 MHz, CDCl<sub>3</sub>):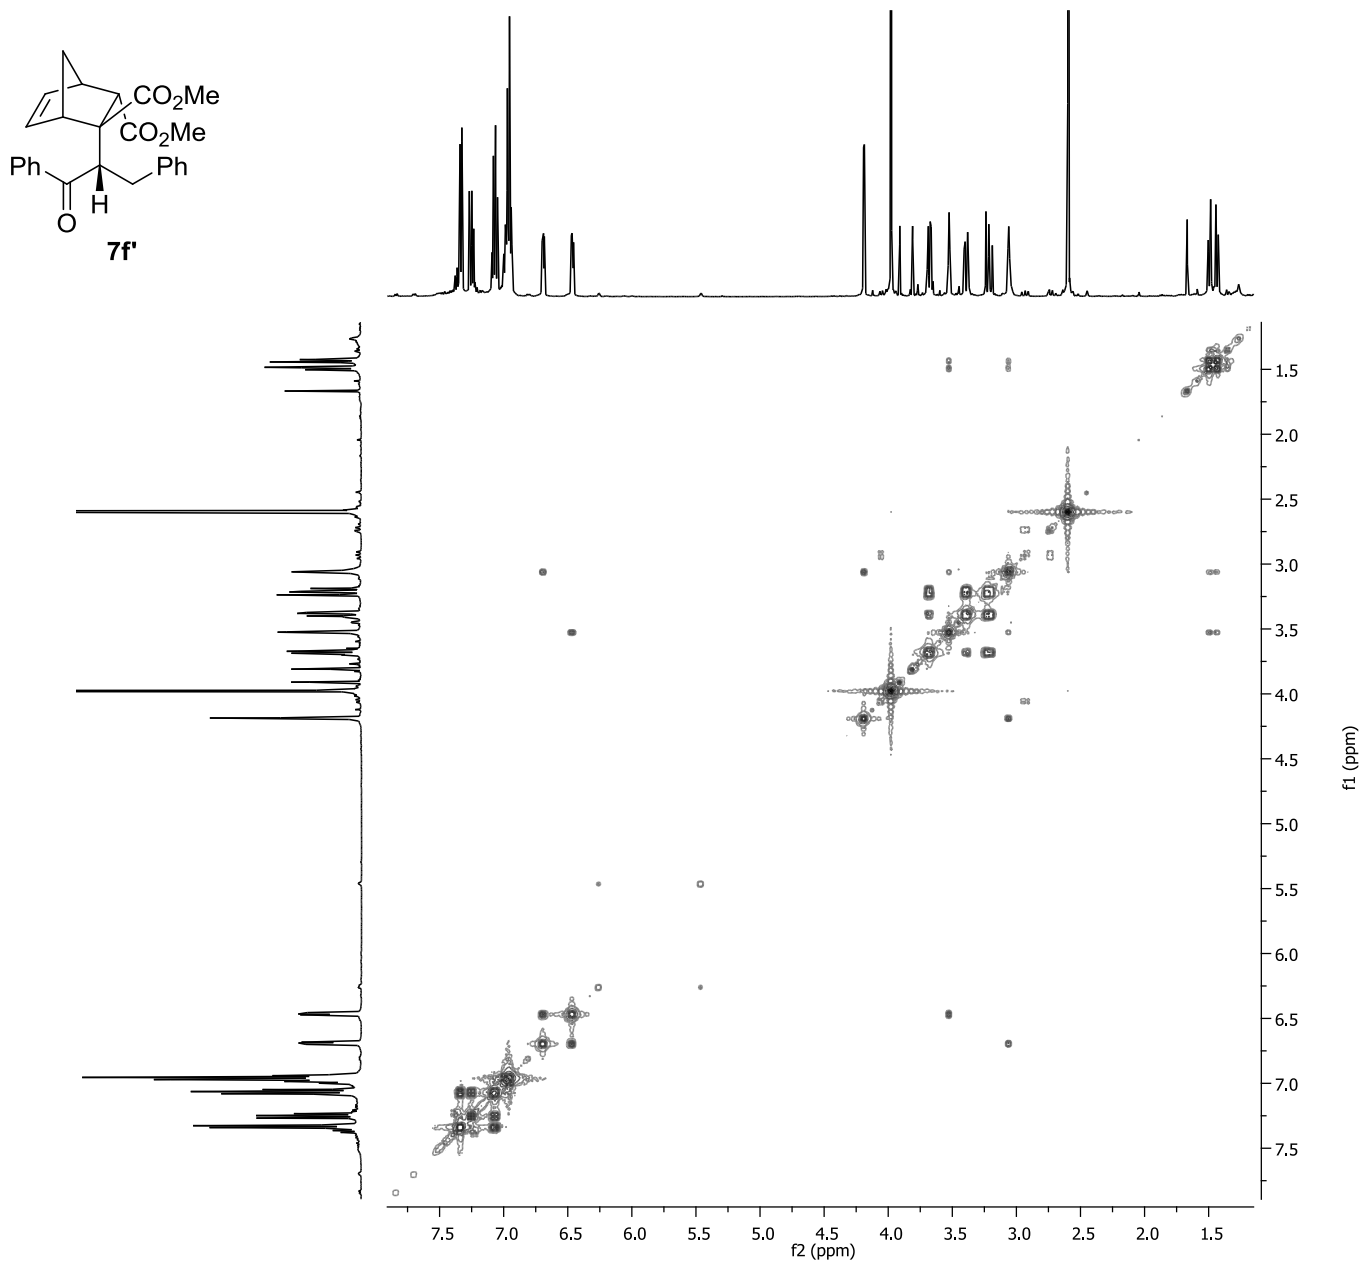

$^1\text{H}$  NMR (500 MHz,  $\text{CDCl}_3$ ):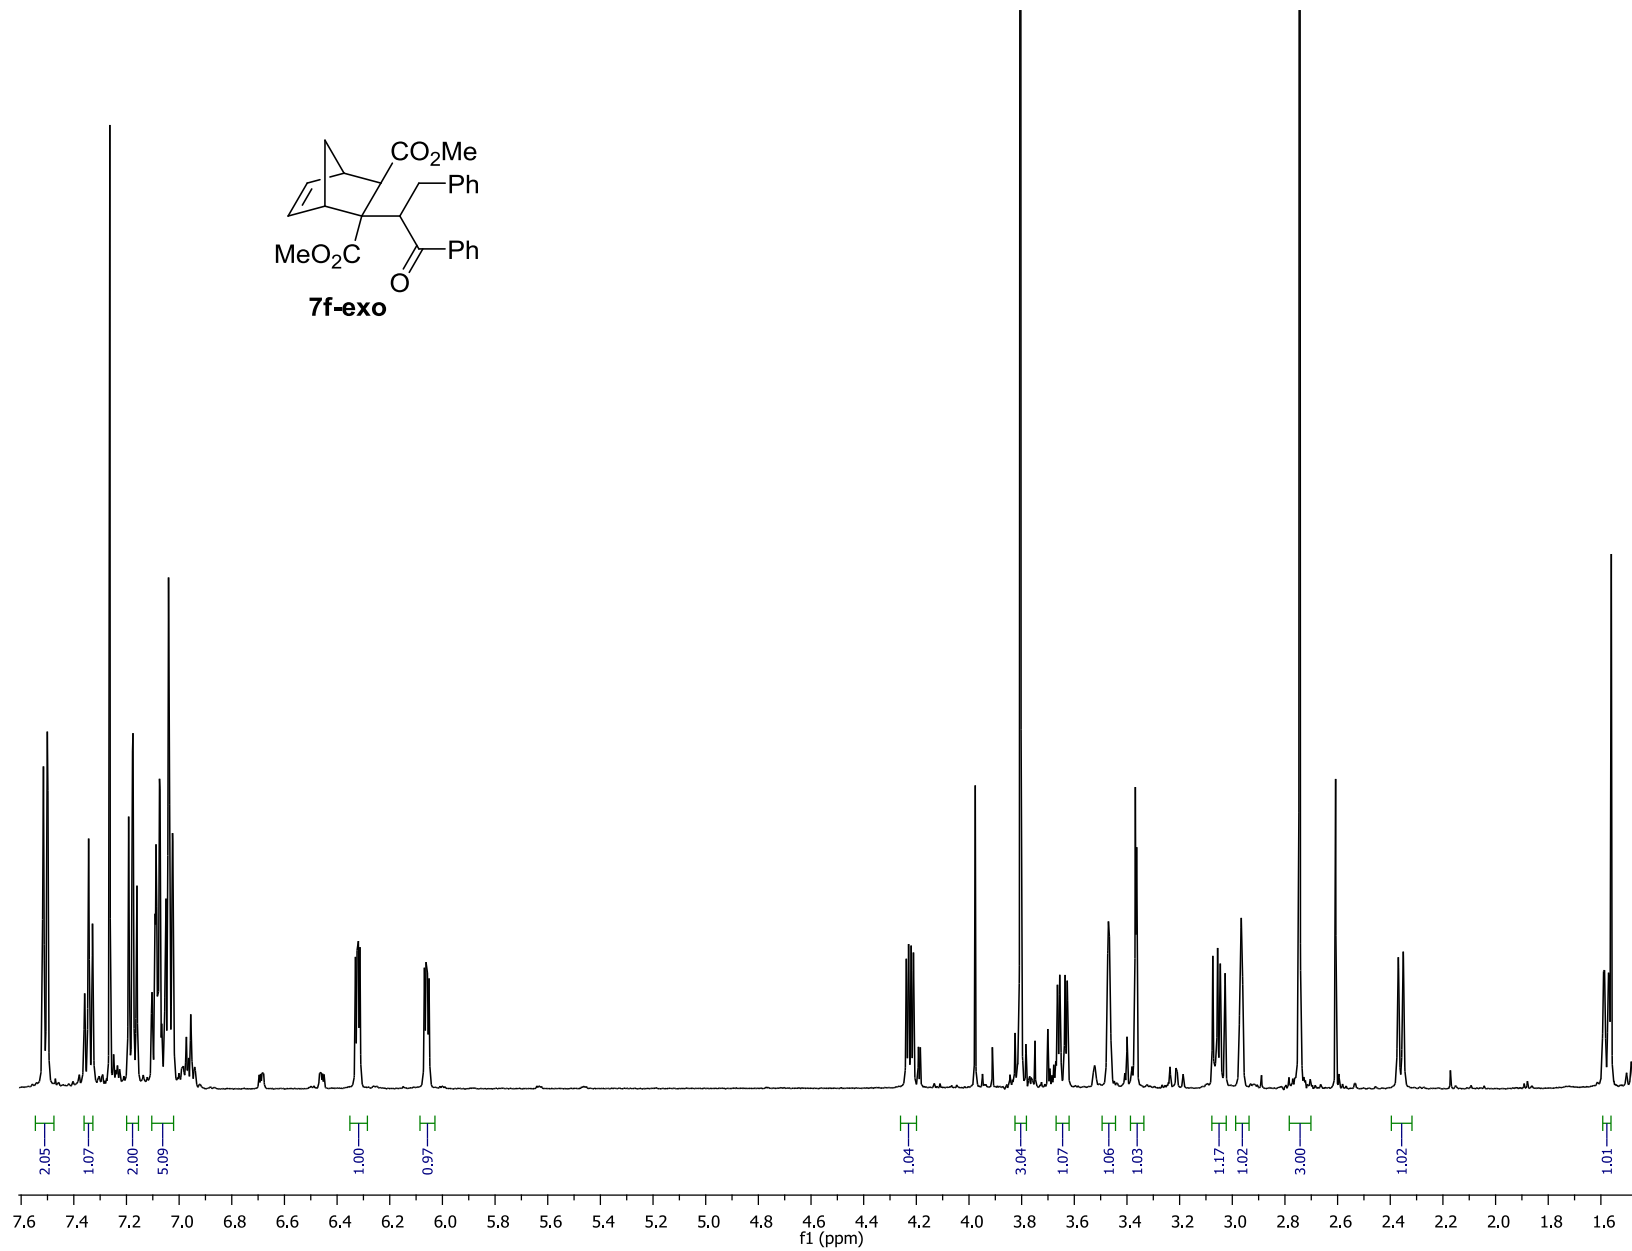

$^1\text{H}$  NMR (500 MHz,  $\text{C}_6\text{D}_6$ ):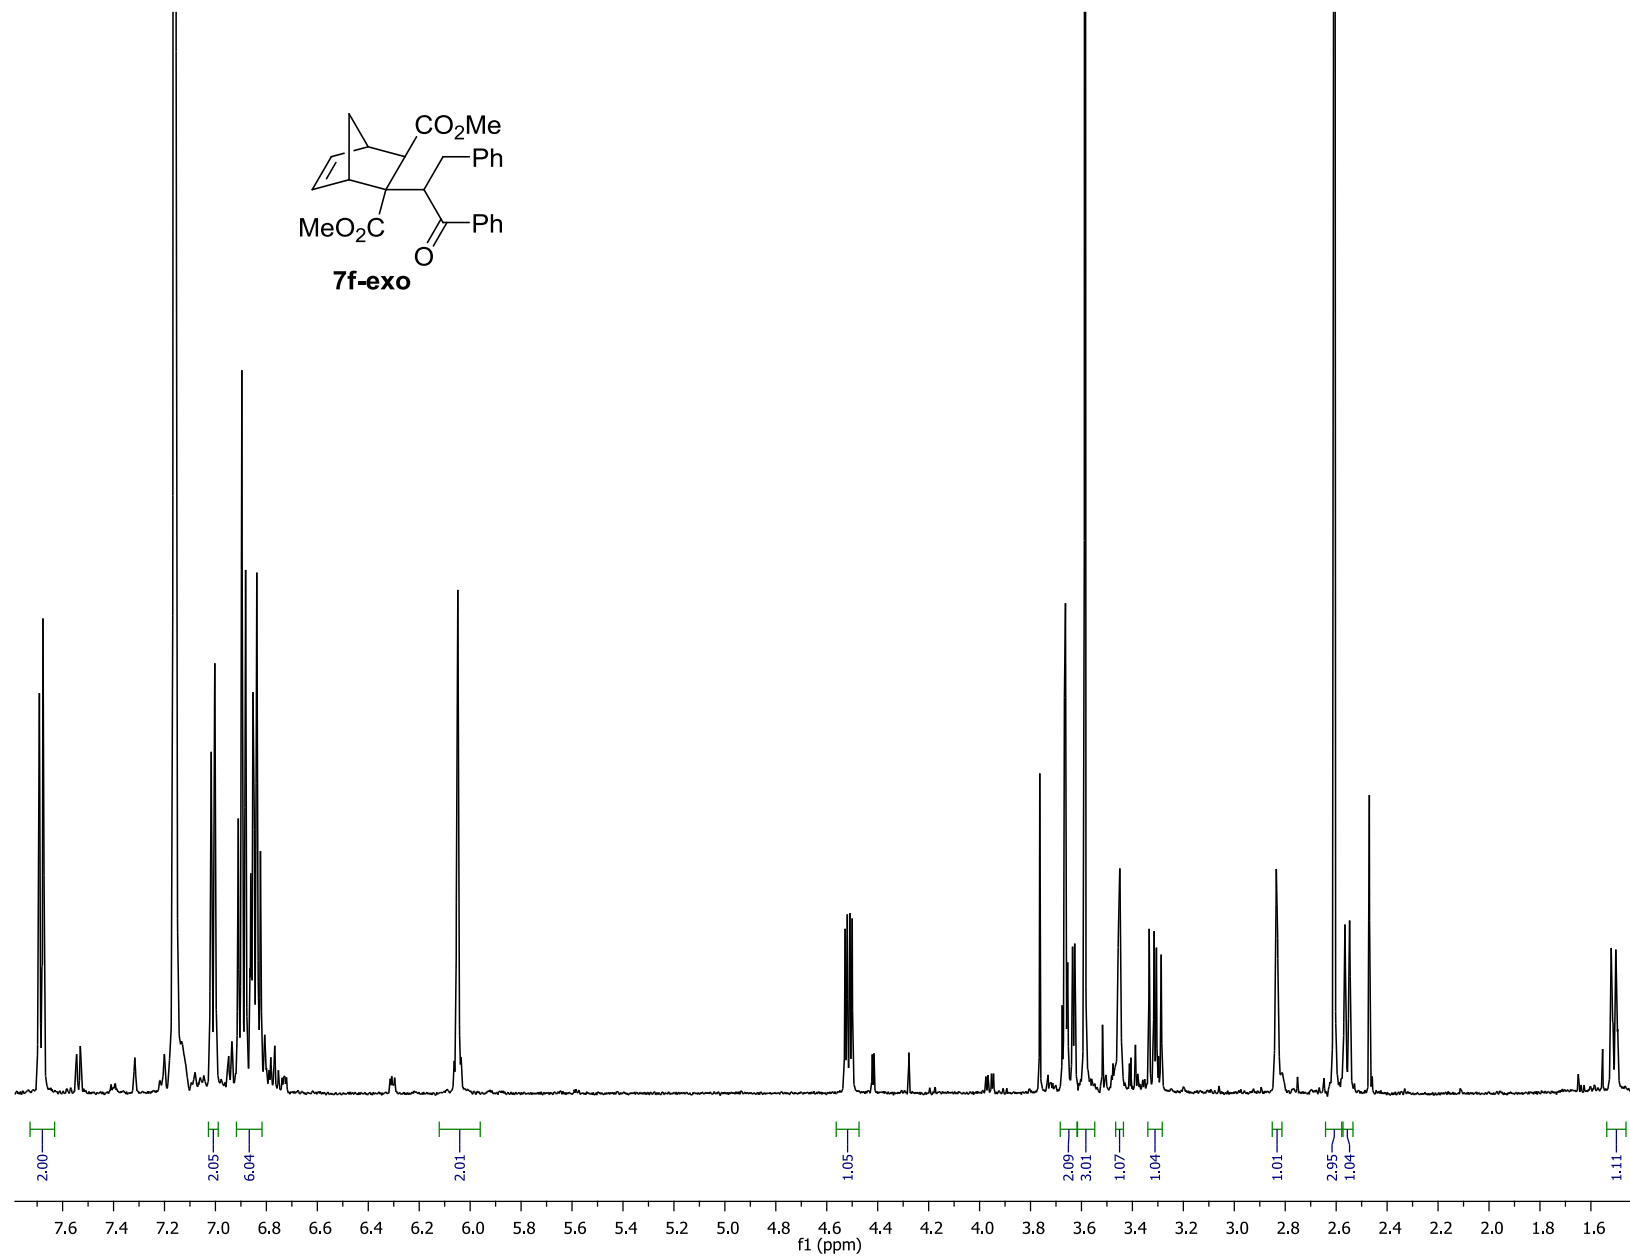

$^{13}\text{C}$  NMR (500 MHz,  $\text{CDCl}_3$ ):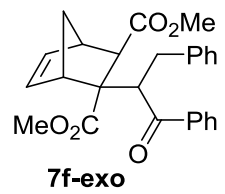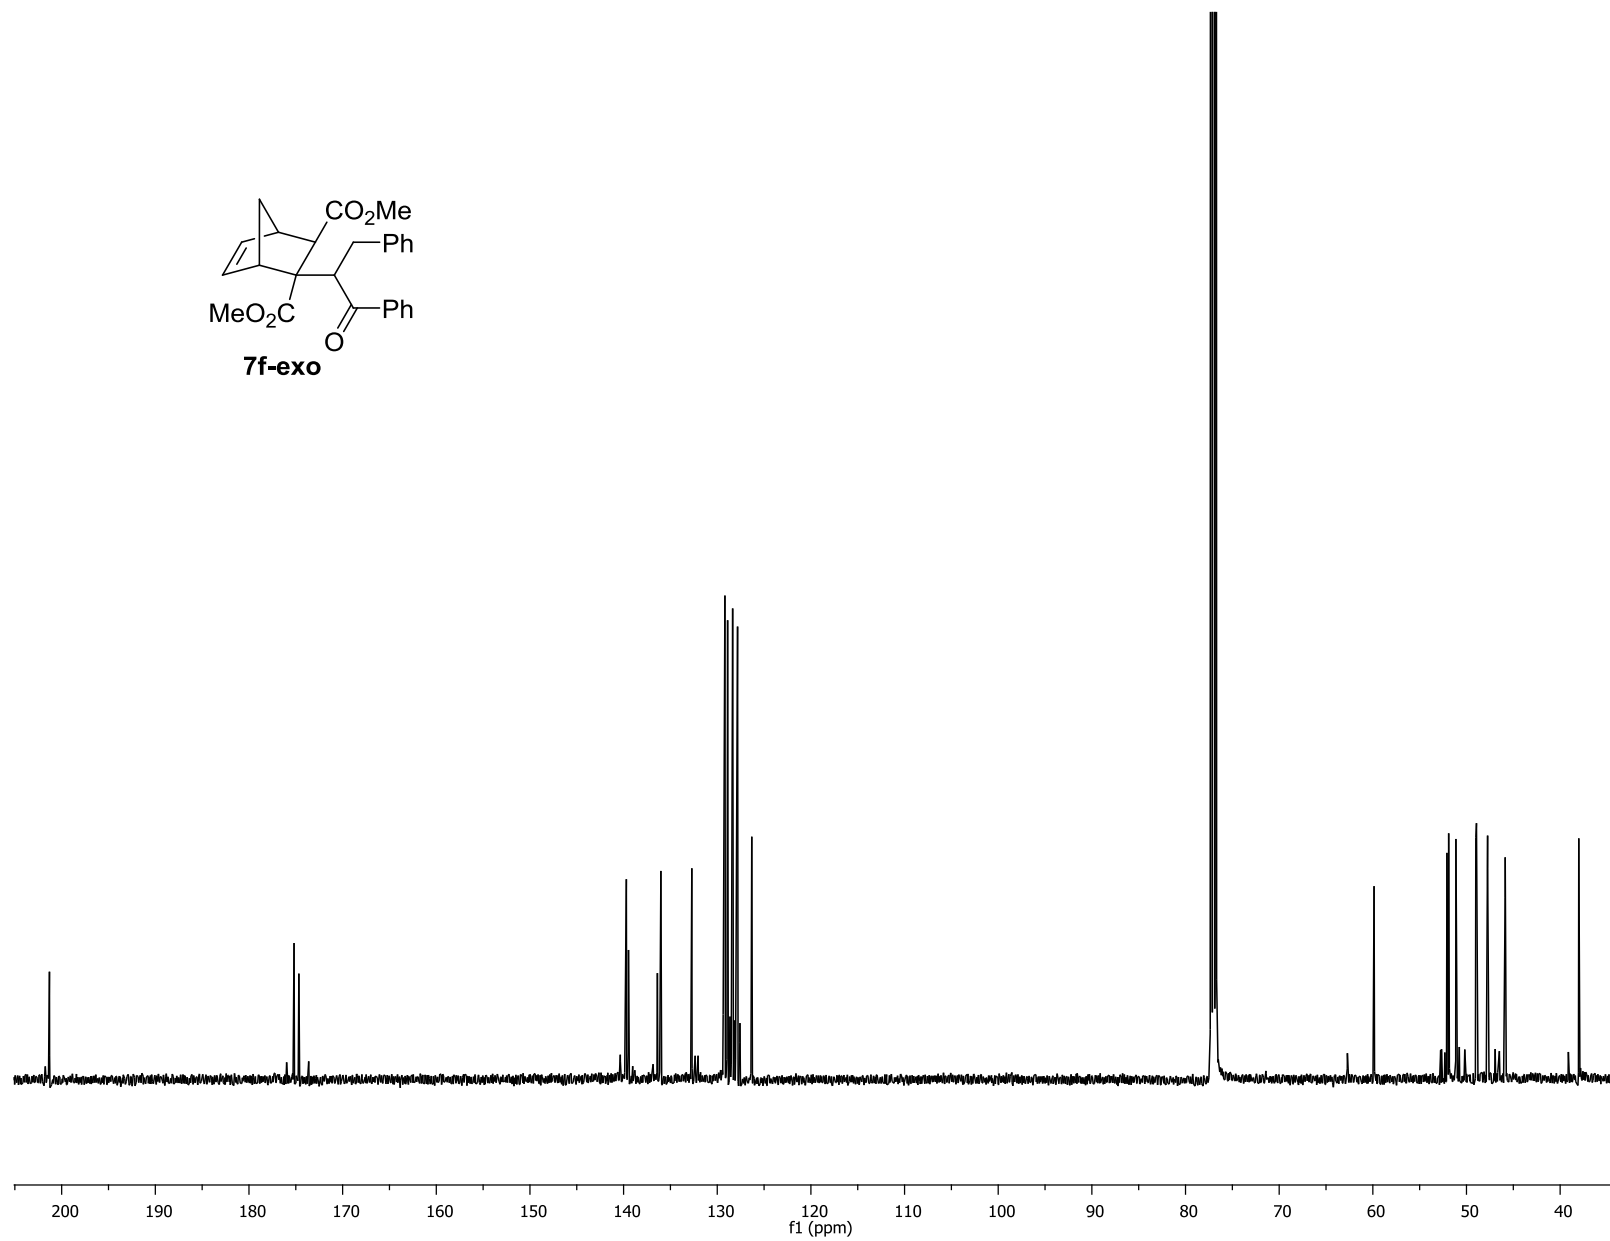

COSY (500 MHz, CDCl<sub>3</sub>):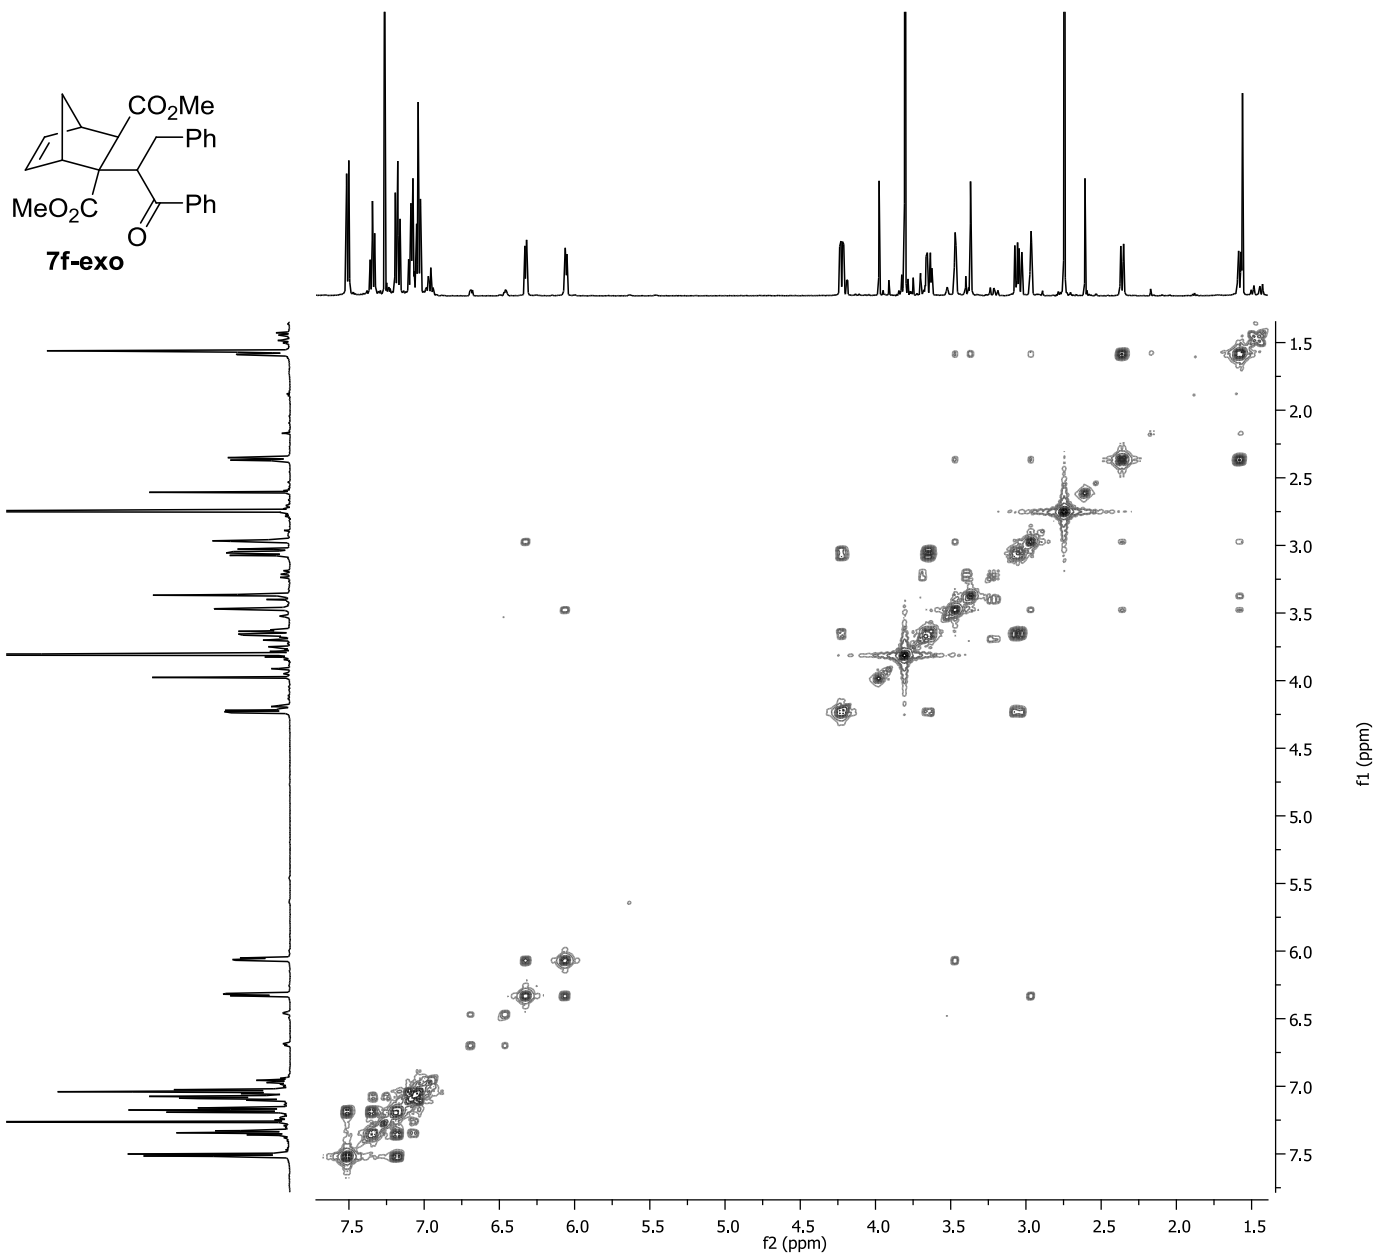



$^1\text{H}$  NMR (500 MHz,  $\text{CDCl}_3$ ):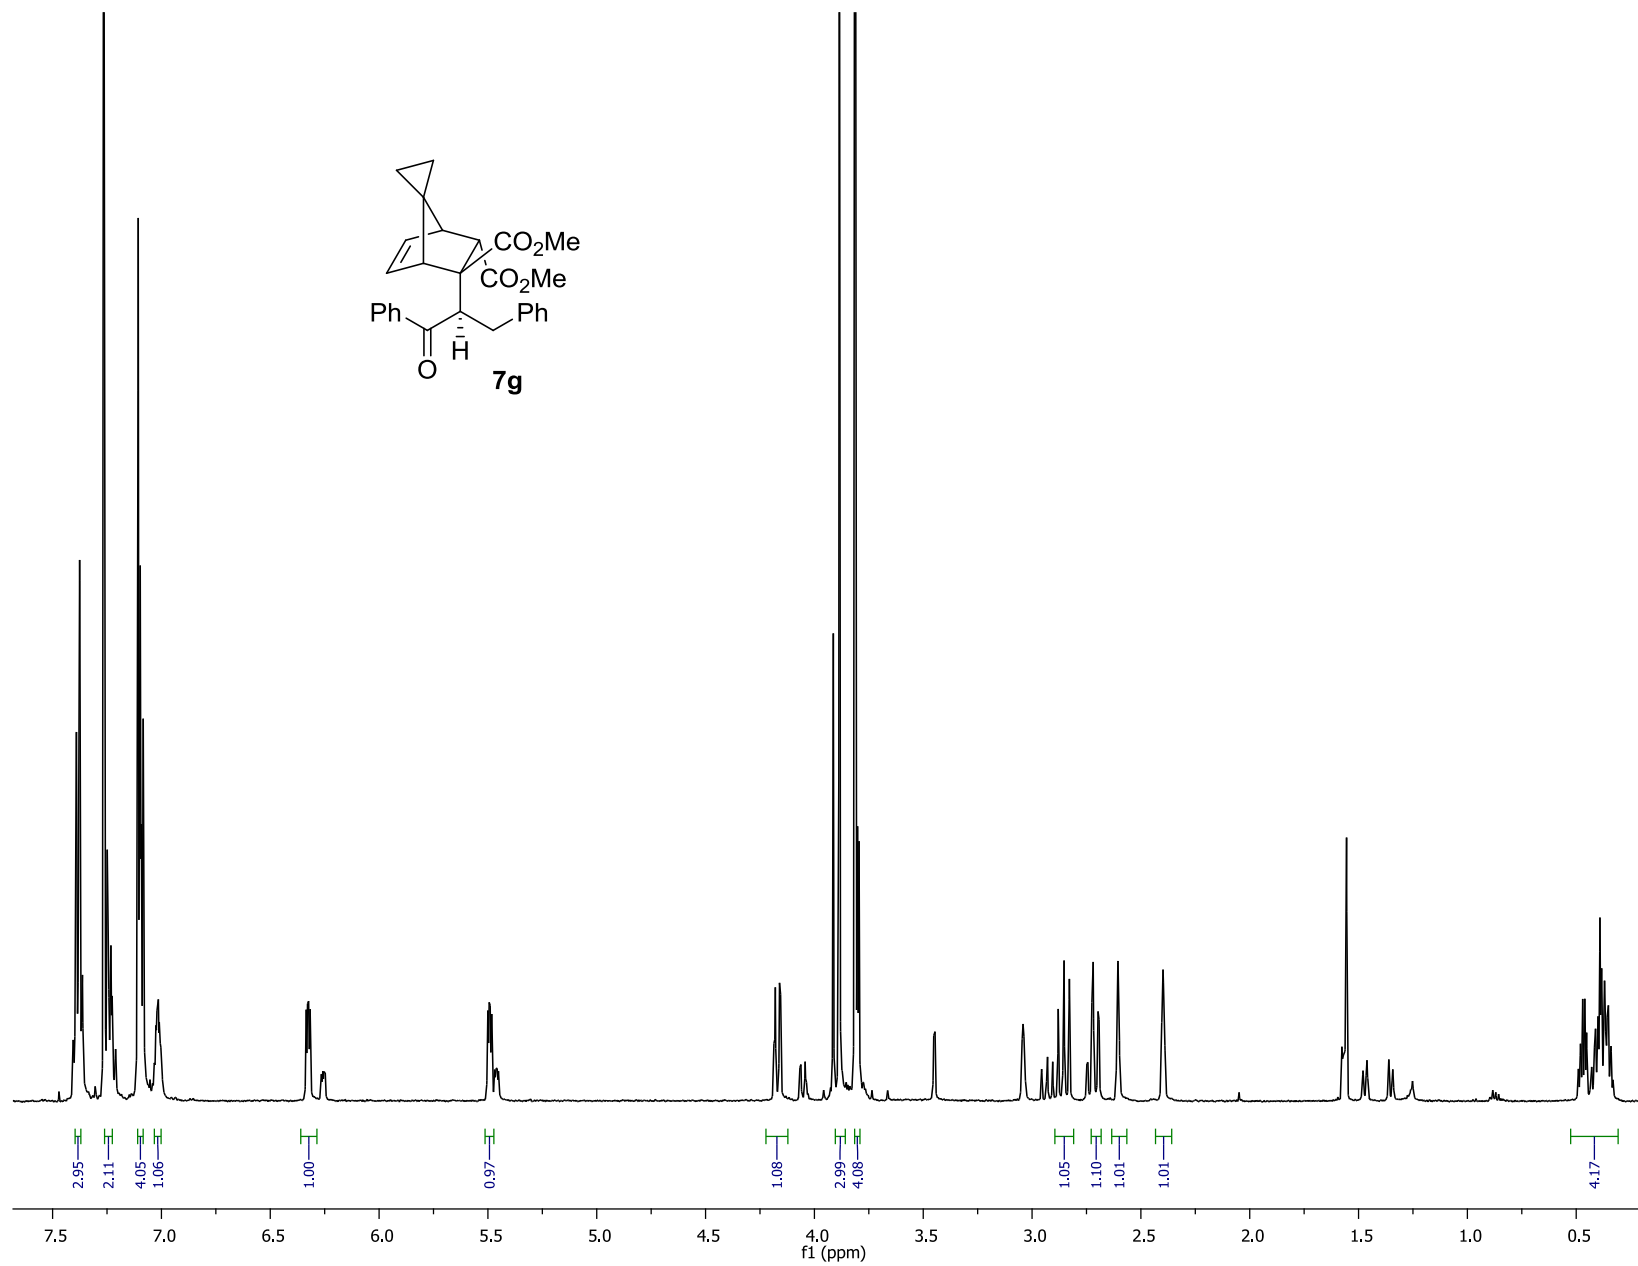

$^{13}\text{C}$  NMR (500 MHz,  $\text{CDCl}_3$ ):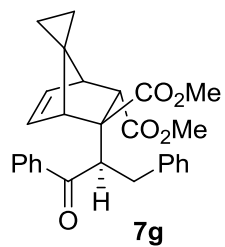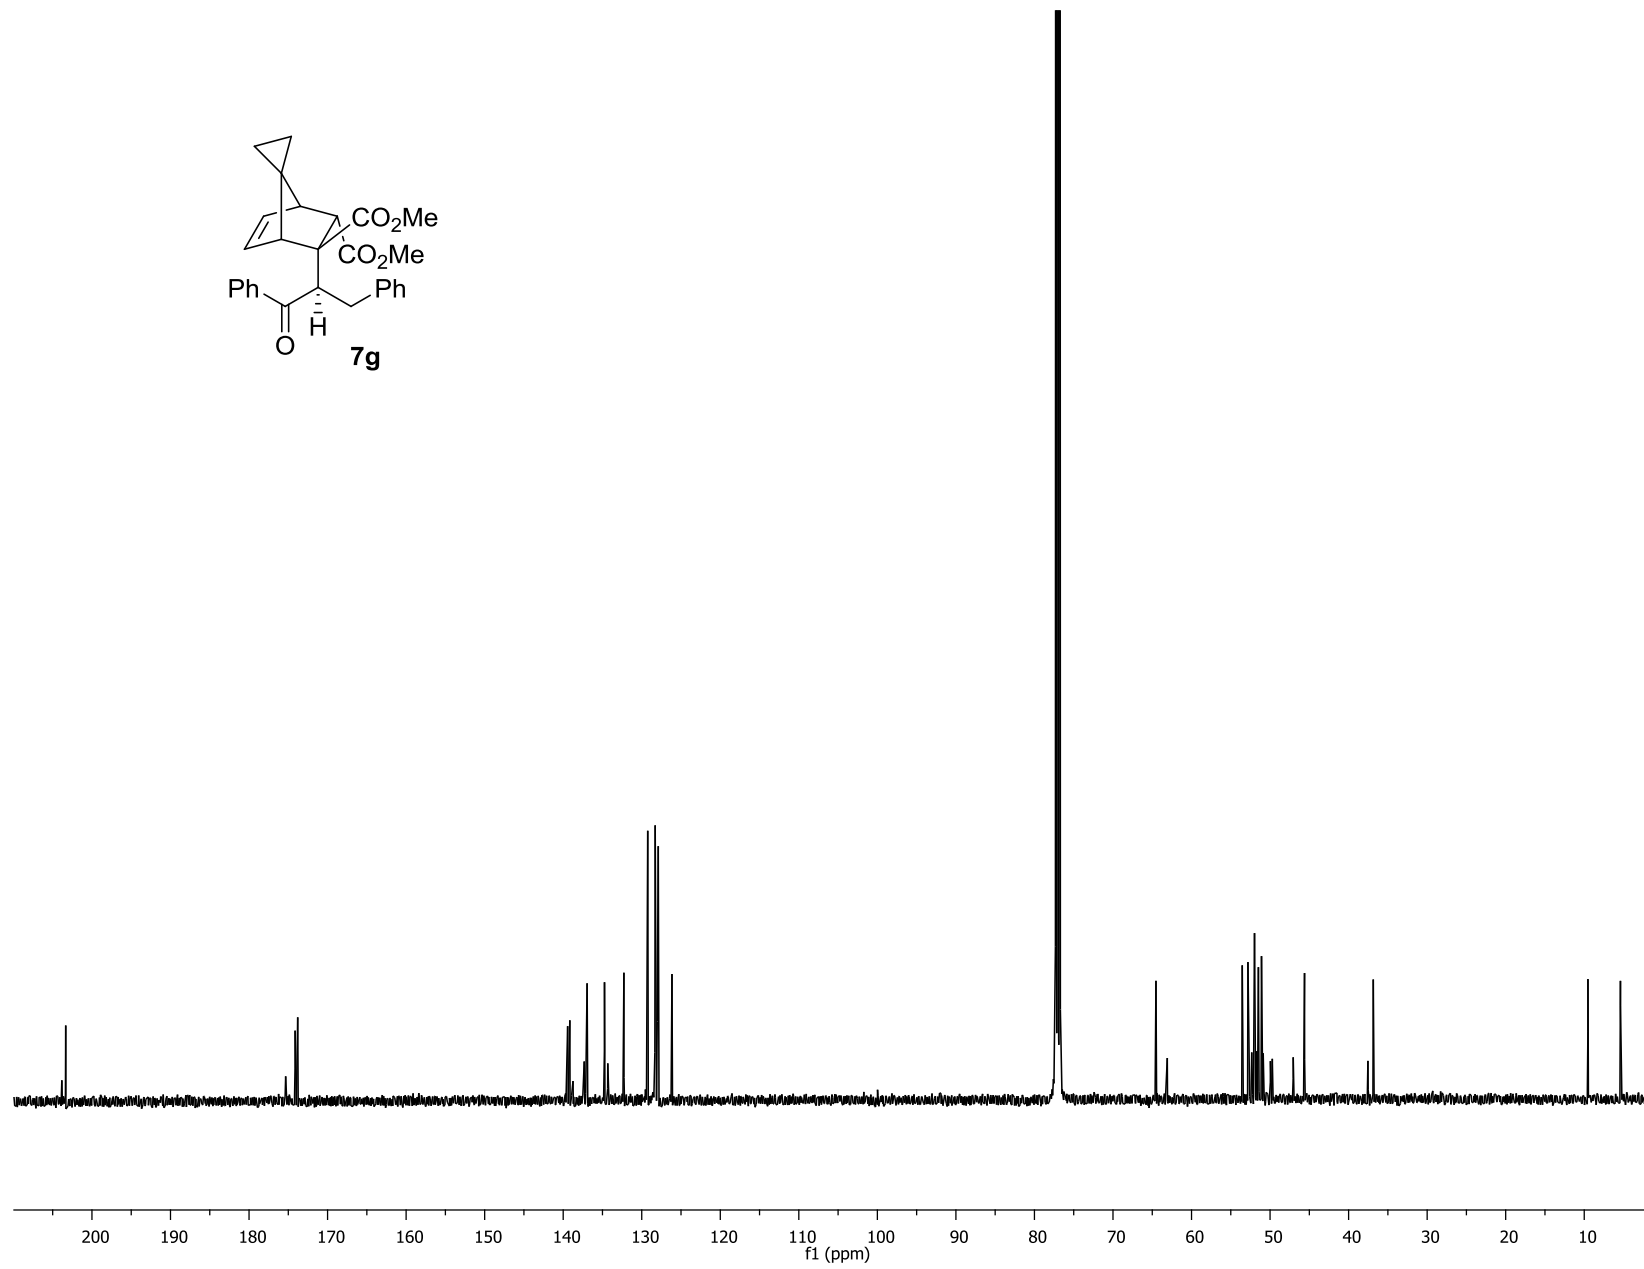

$^1\text{H}$  NMR (500 MHz,  $\text{CDCl}_3$ ):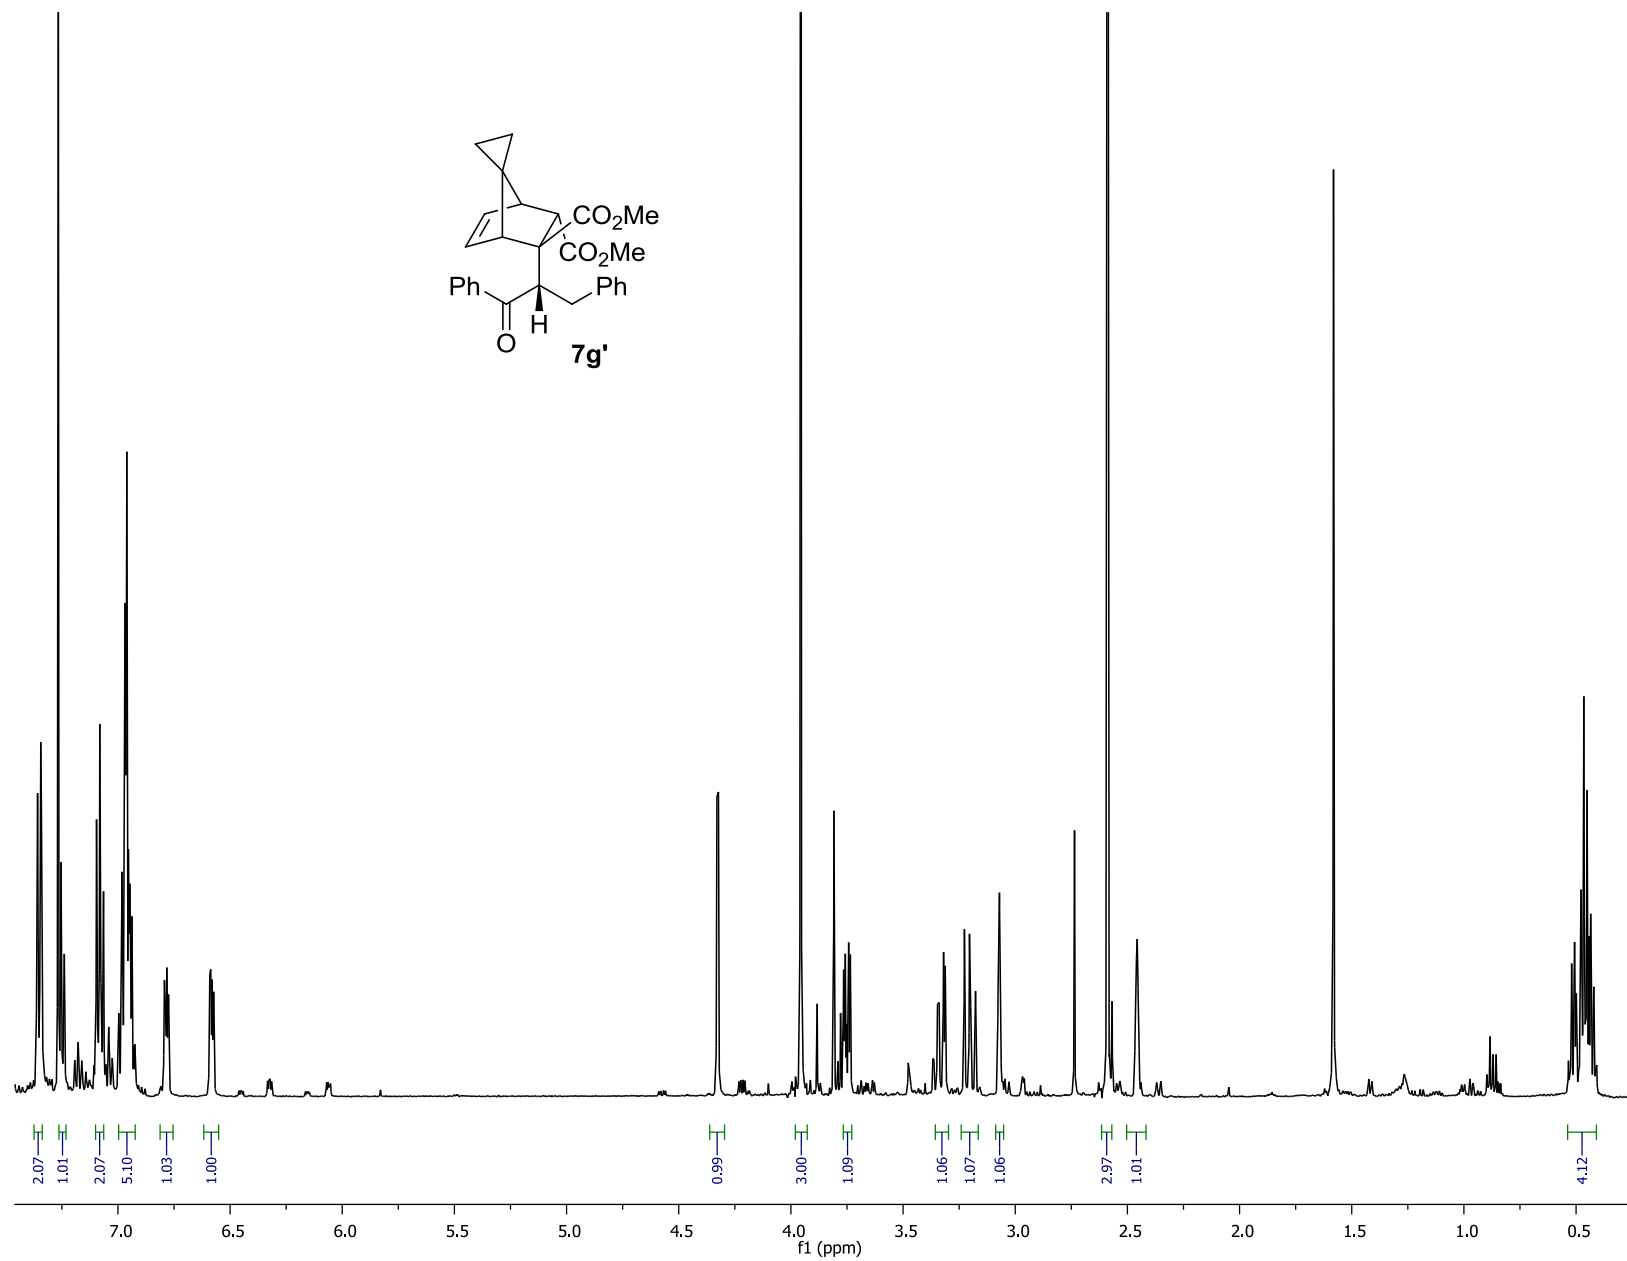

$^{13}\text{C}$  NMR (500 MHz,  $\text{CDCl}_3$ ):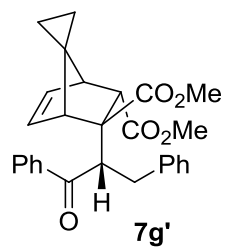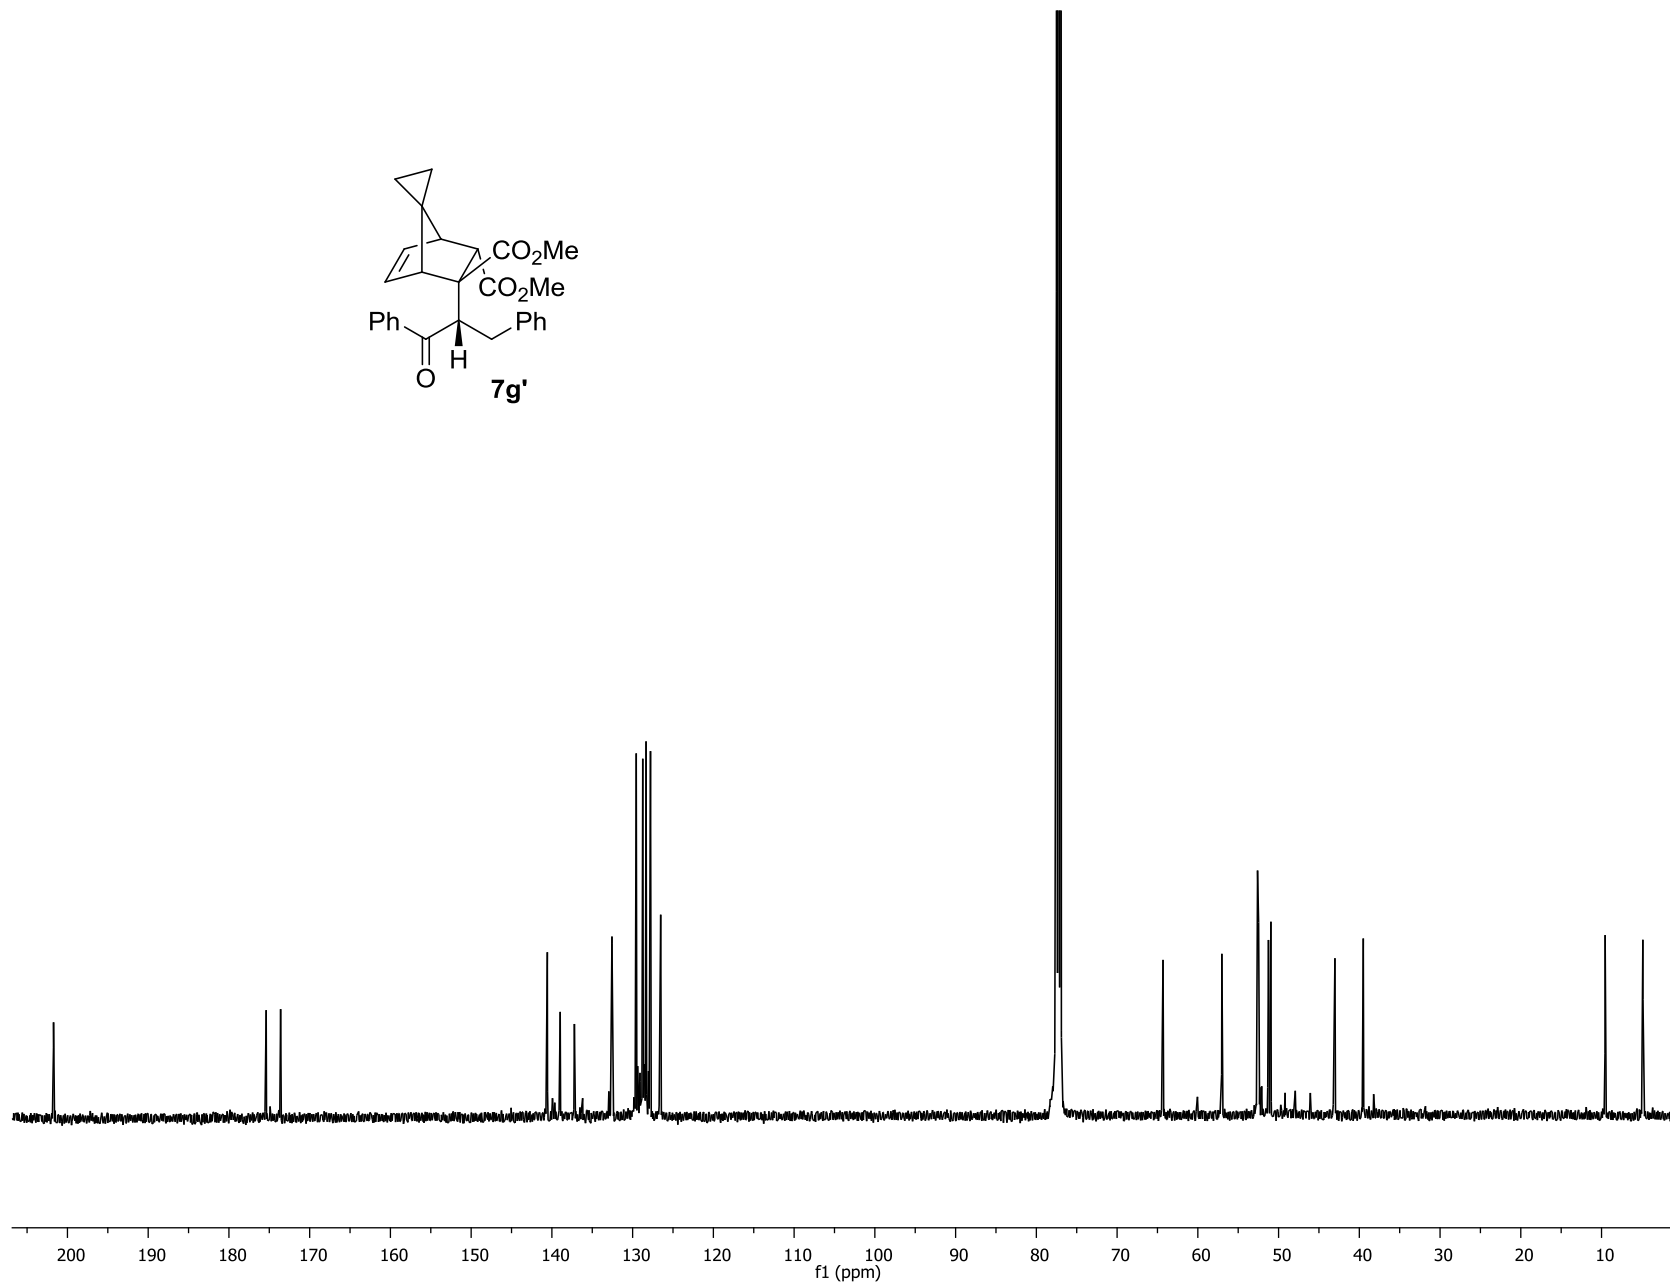

$^1\text{H}$  NMR (500 MHz,  $\text{CDCl}_3$ ):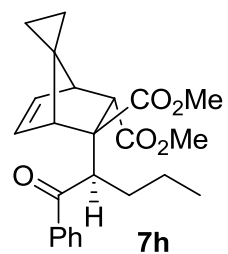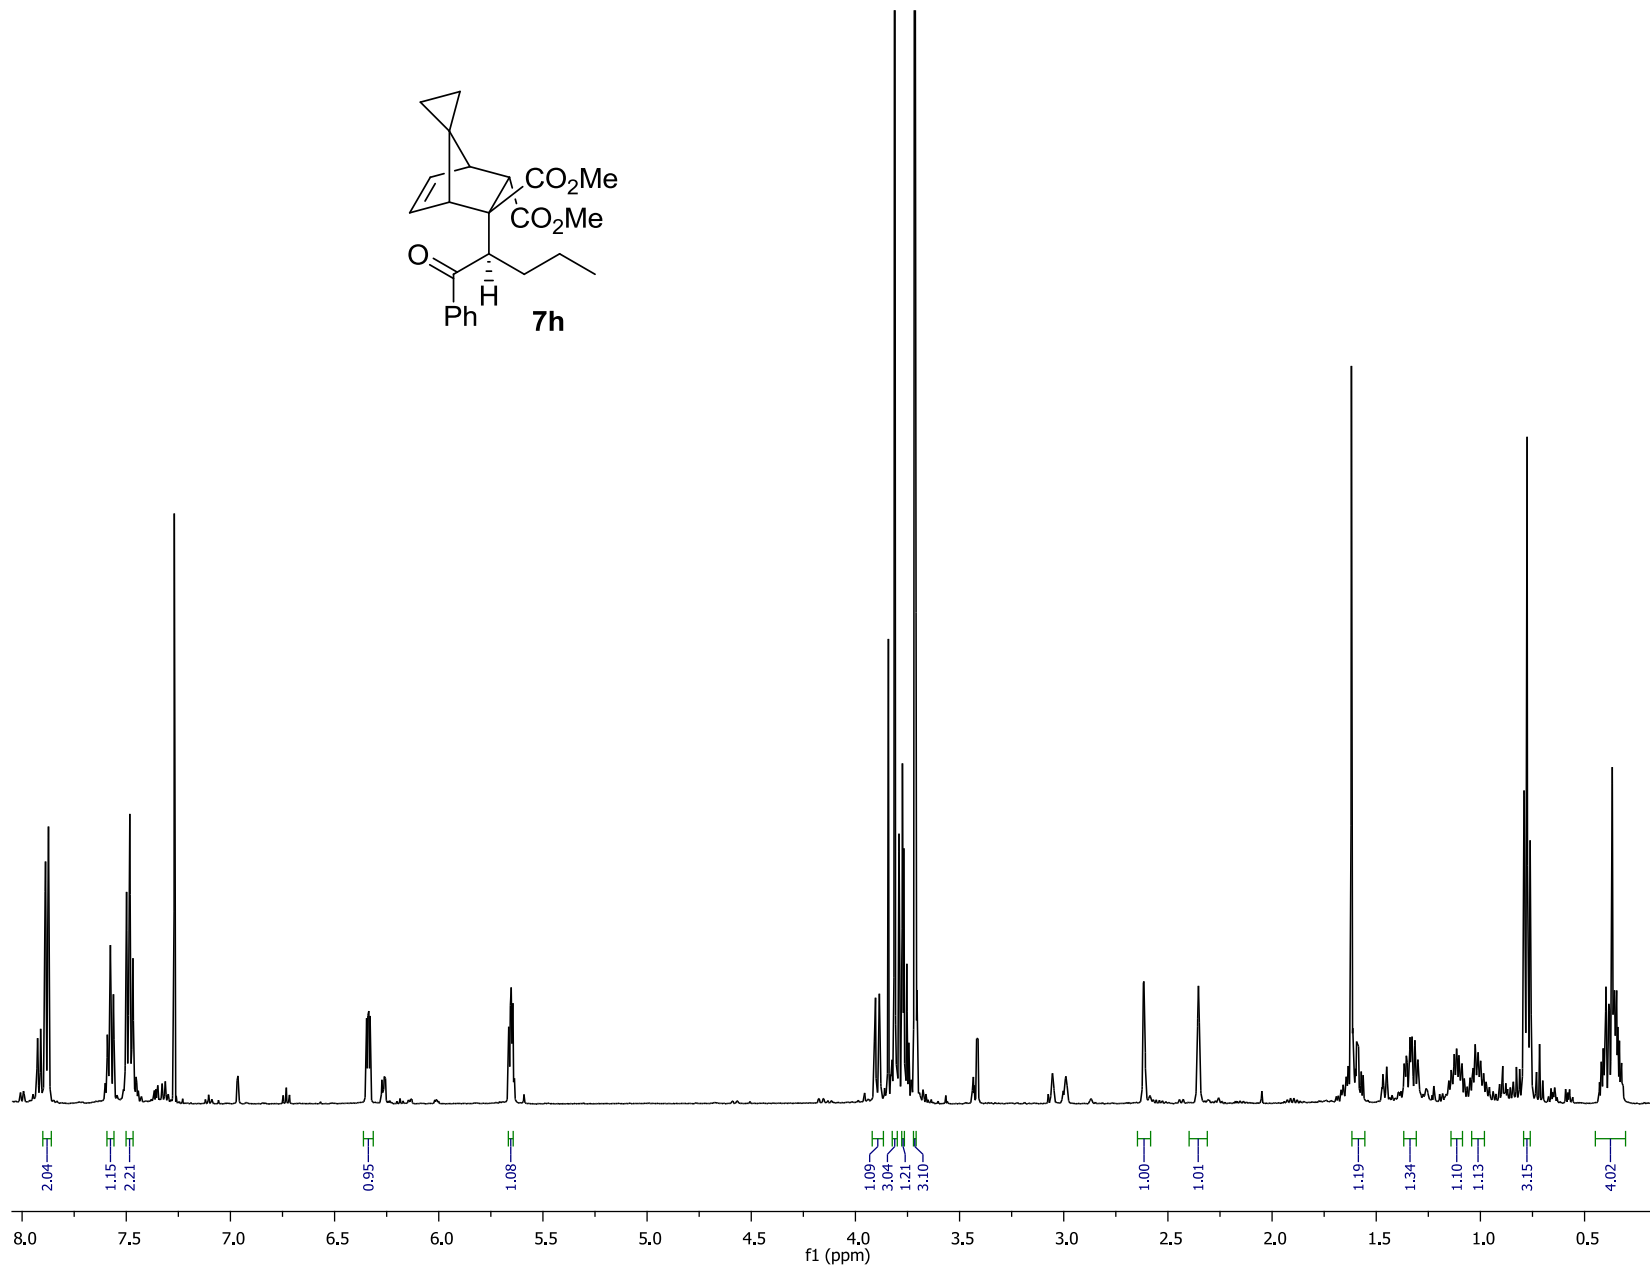

$^1\text{H}$  NMR (500 MHz,  $\text{CDCl}_3$ ):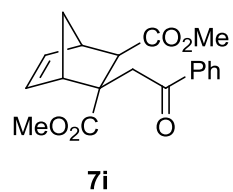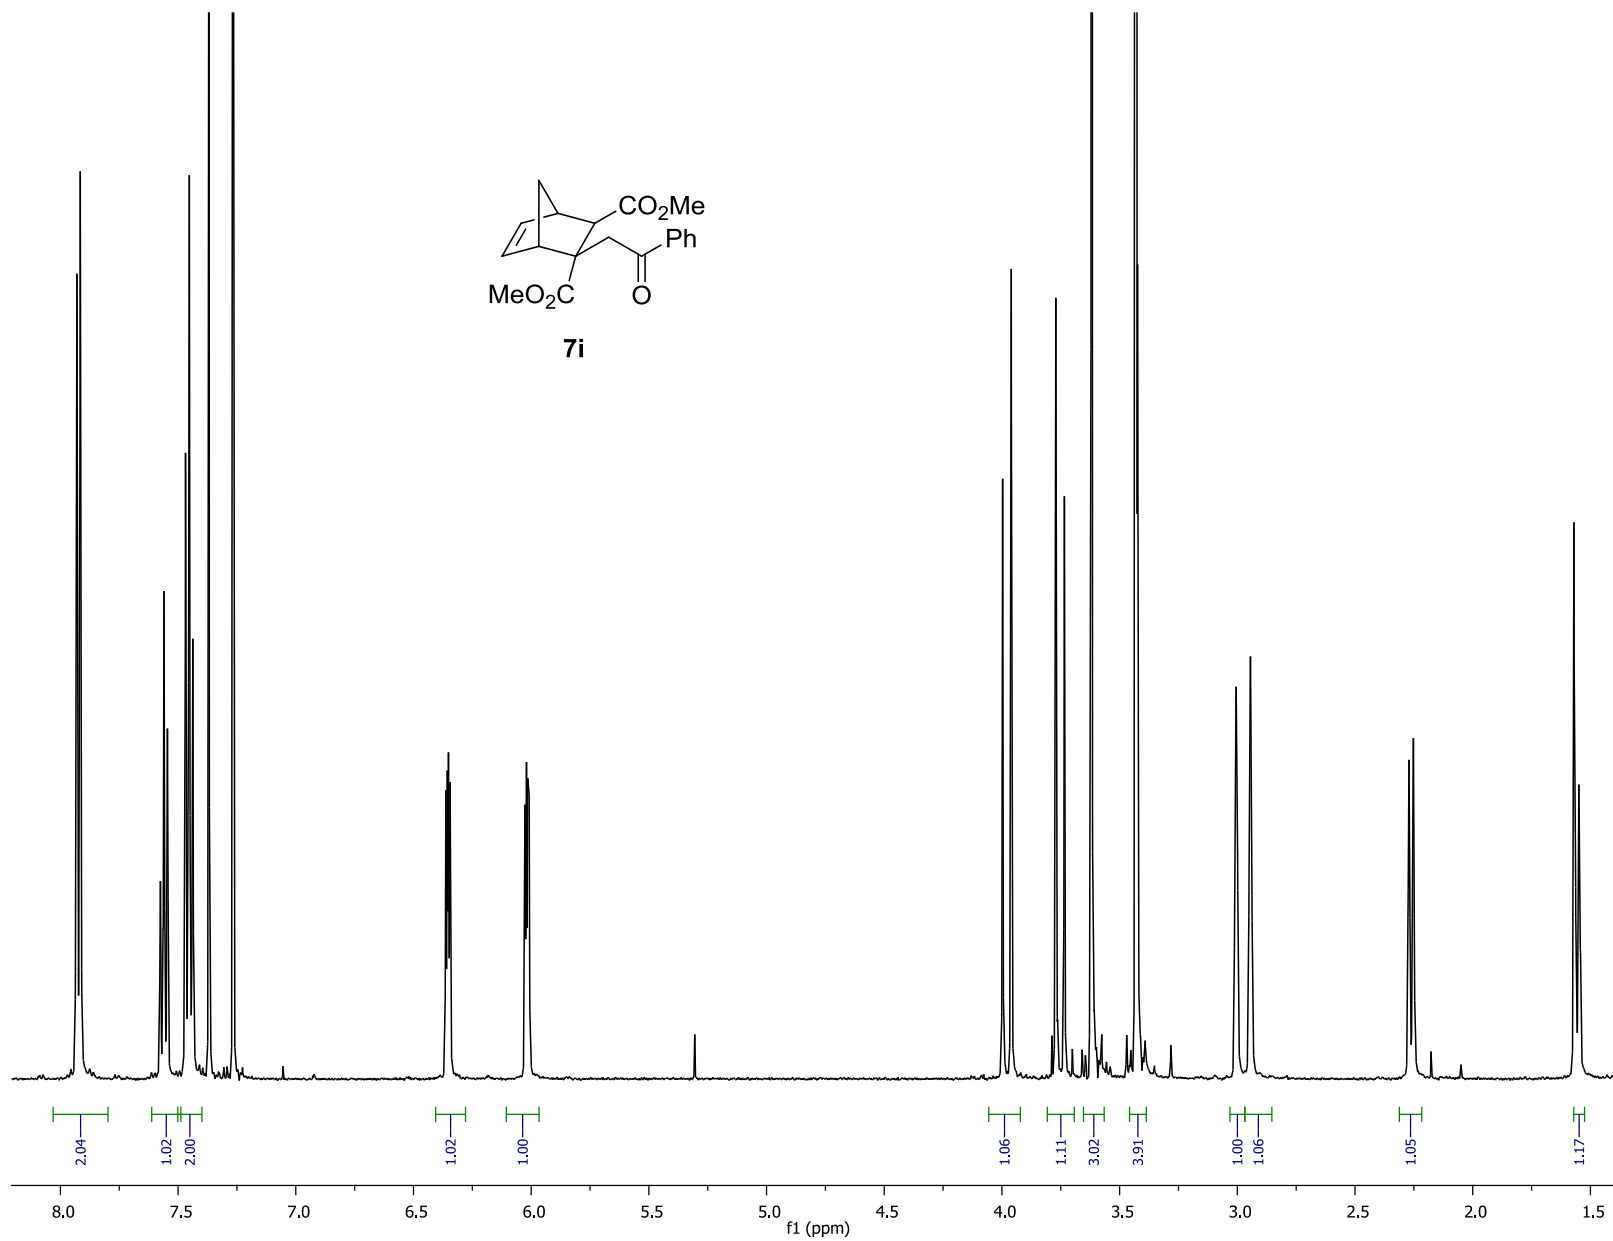

$^1\text{H}$  NMR (500 MHz,  $\text{C}_6\text{D}_6$ ):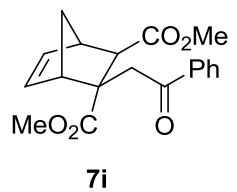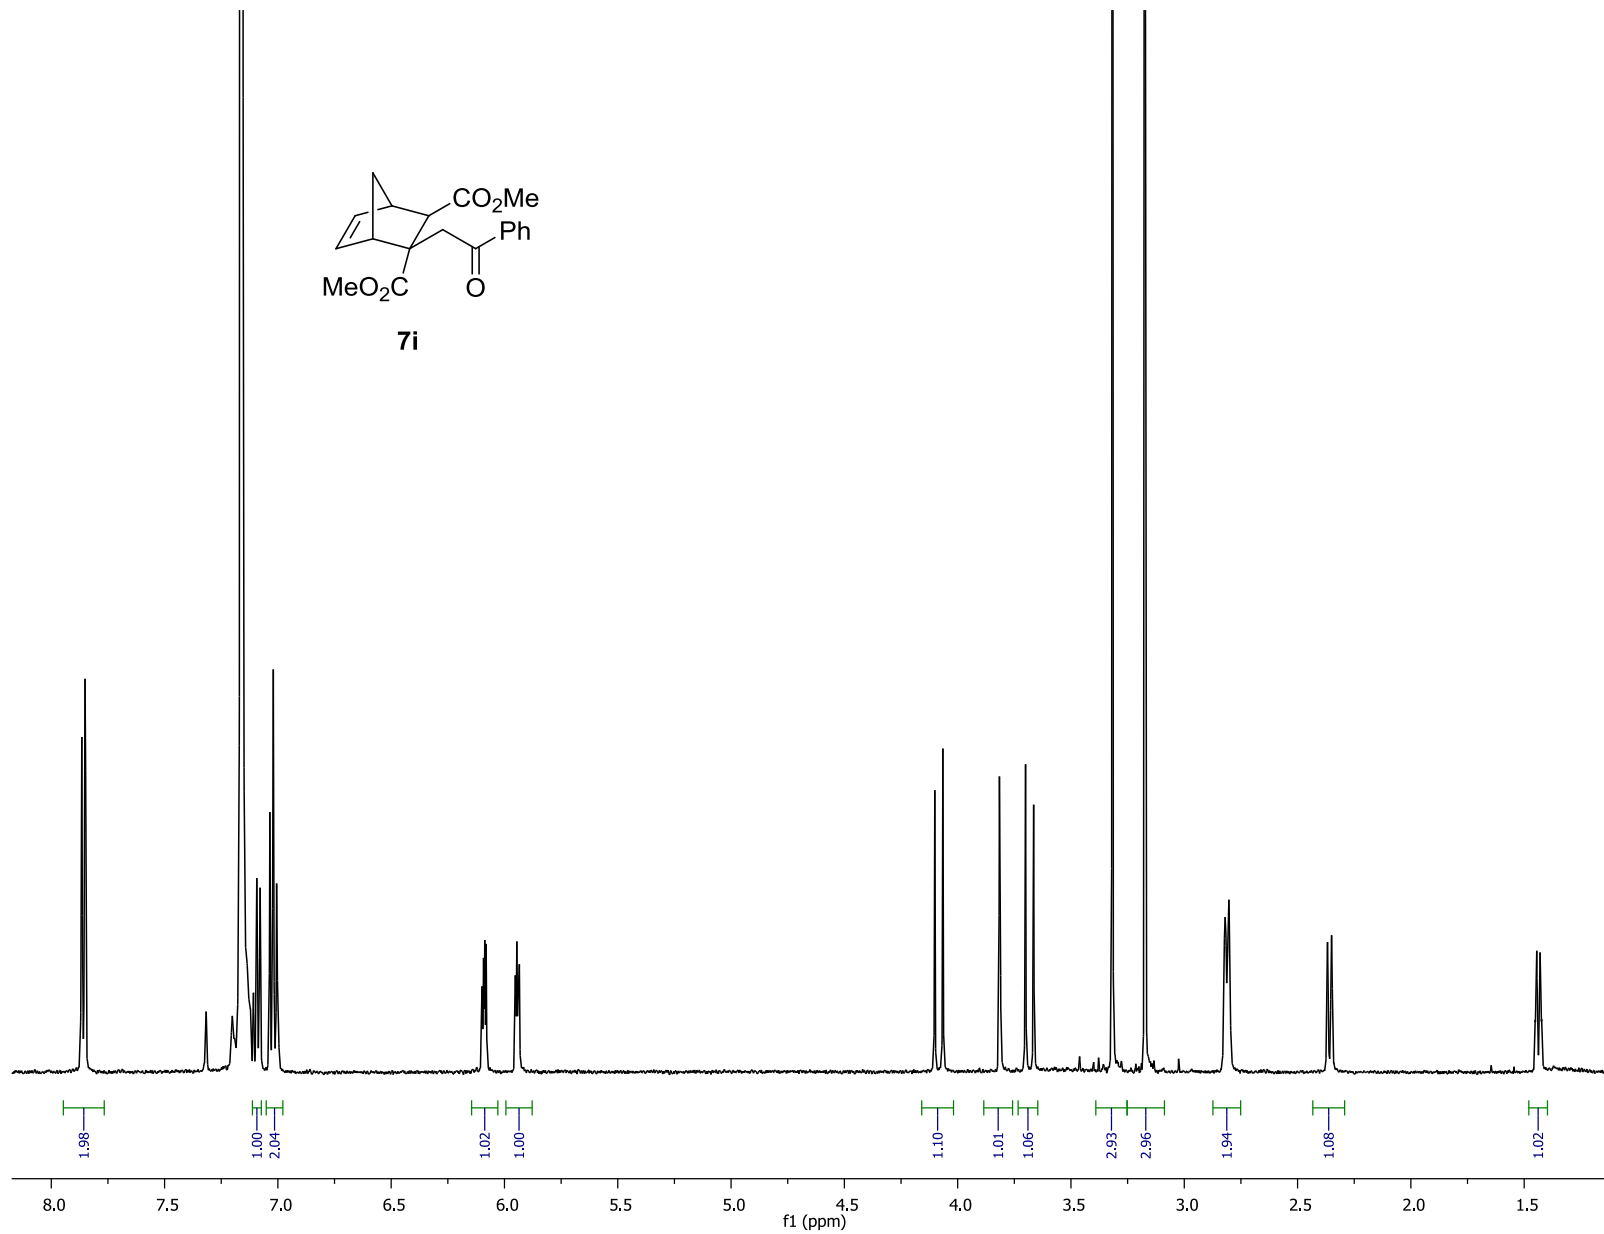

$^{13}\text{C}$  NMR (500 MHz,  $\text{CDCl}_3$ ):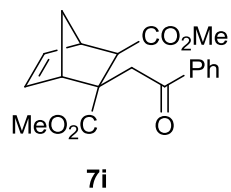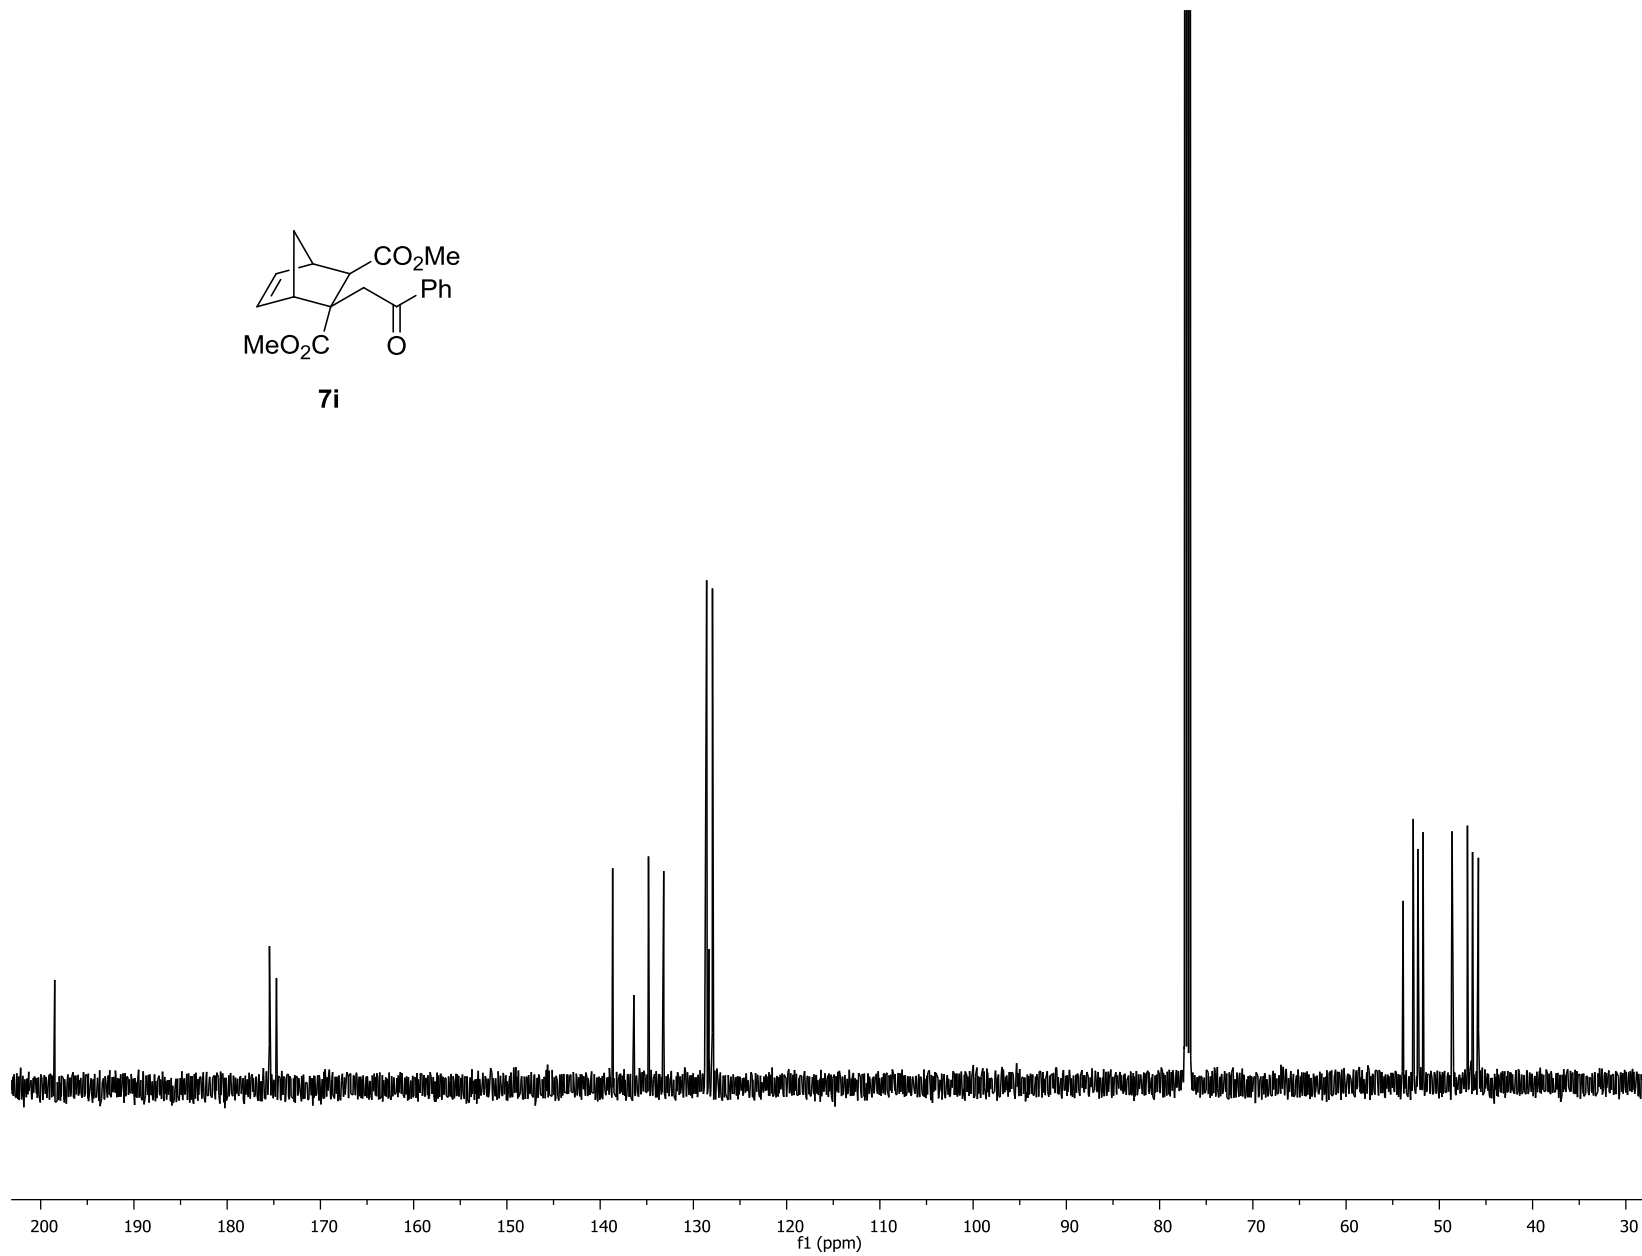



$^1\text{H}$  NMR (500 MHz,  $\text{CDCl}_3$ ):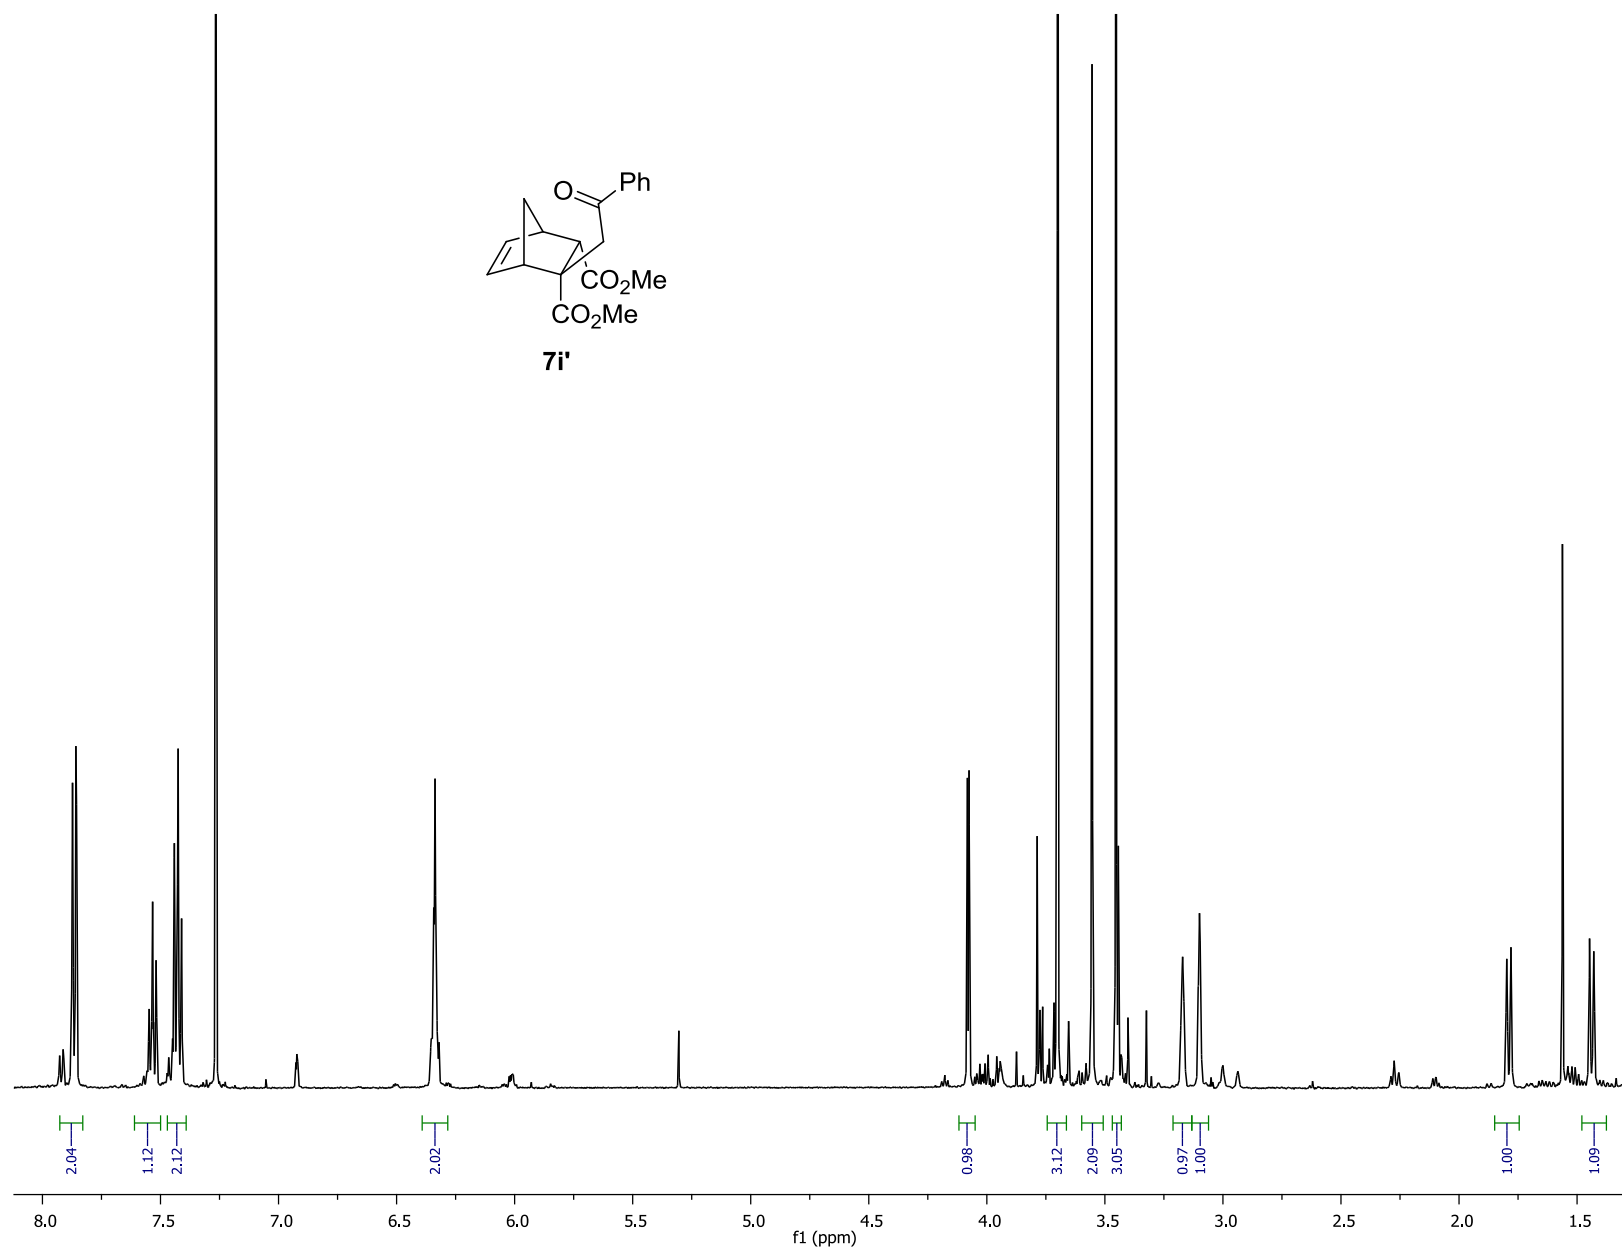

$^1\text{H}$  NMR (500 MHz,  $\text{C}_6\text{D}_6$ ):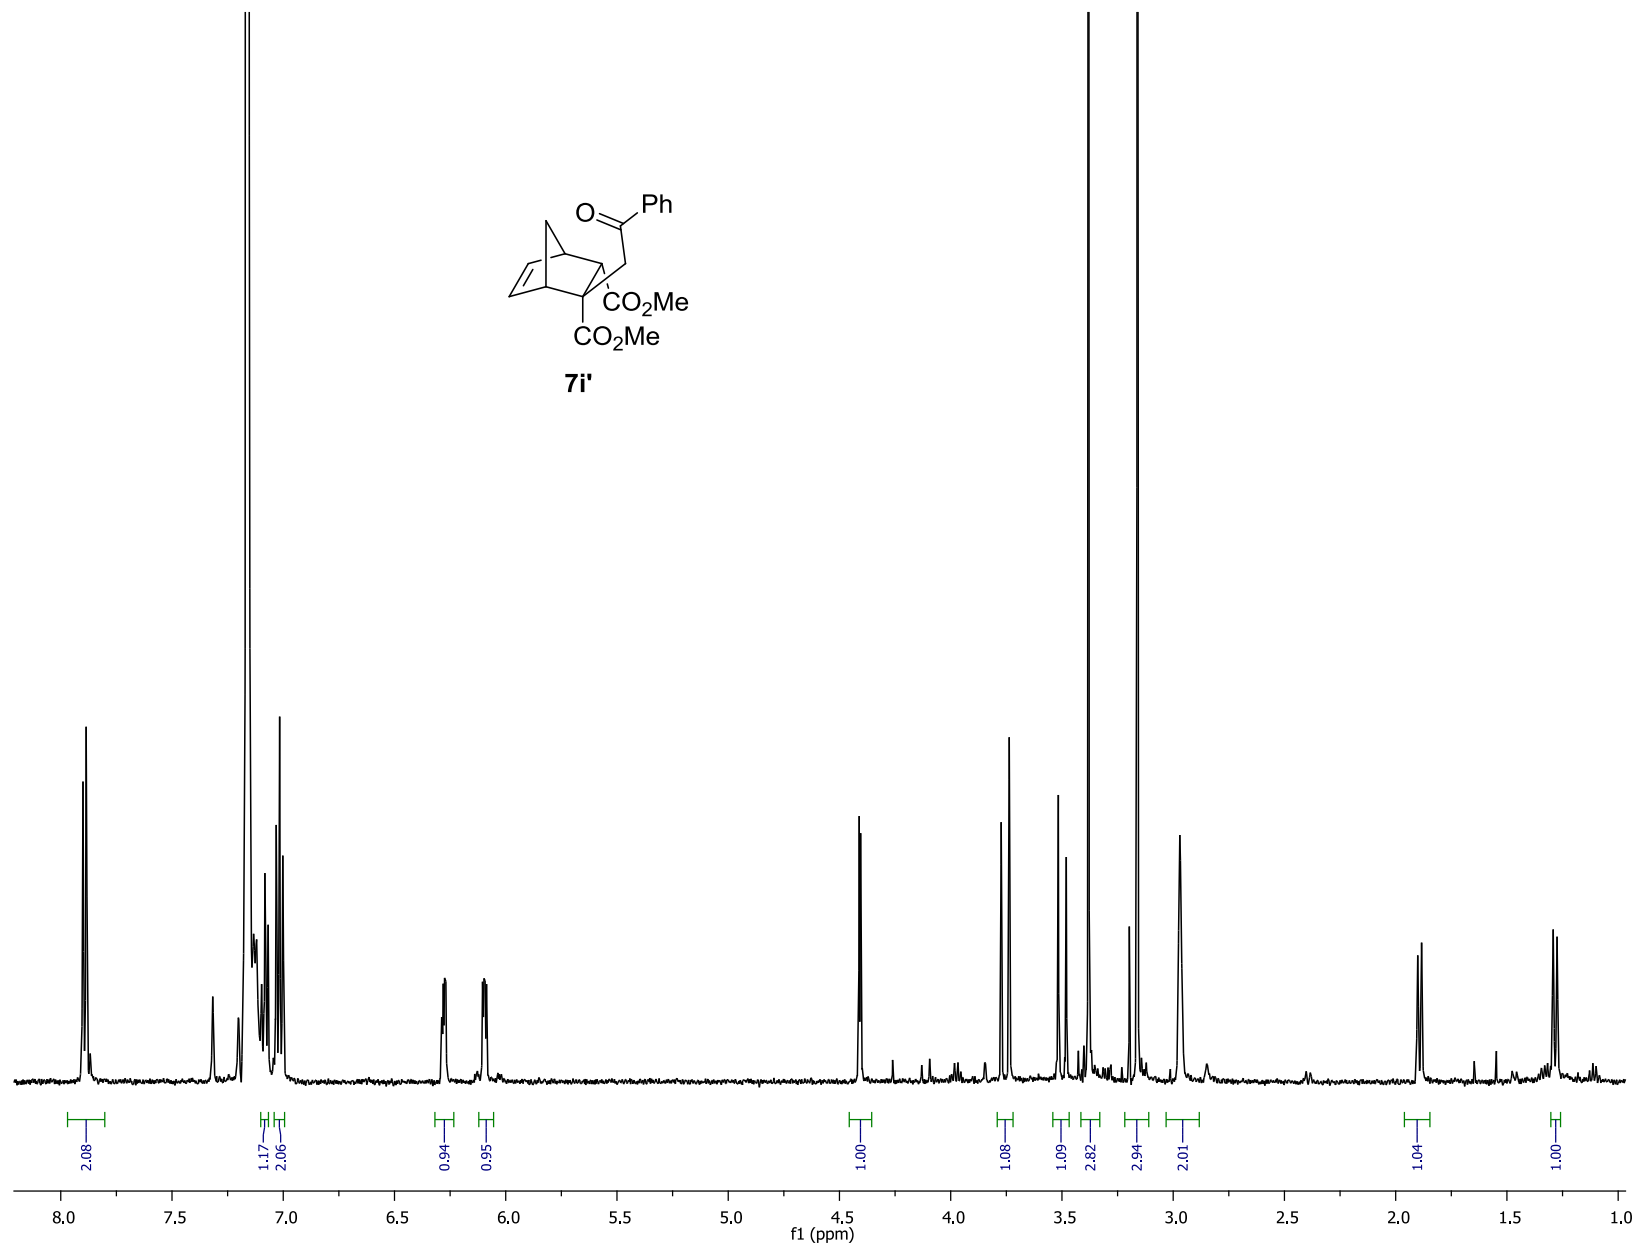

$^{13}\text{C}$  NMR (500 MHz,  $\text{CDCl}_3$ ):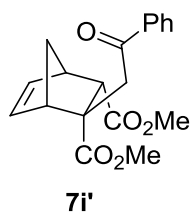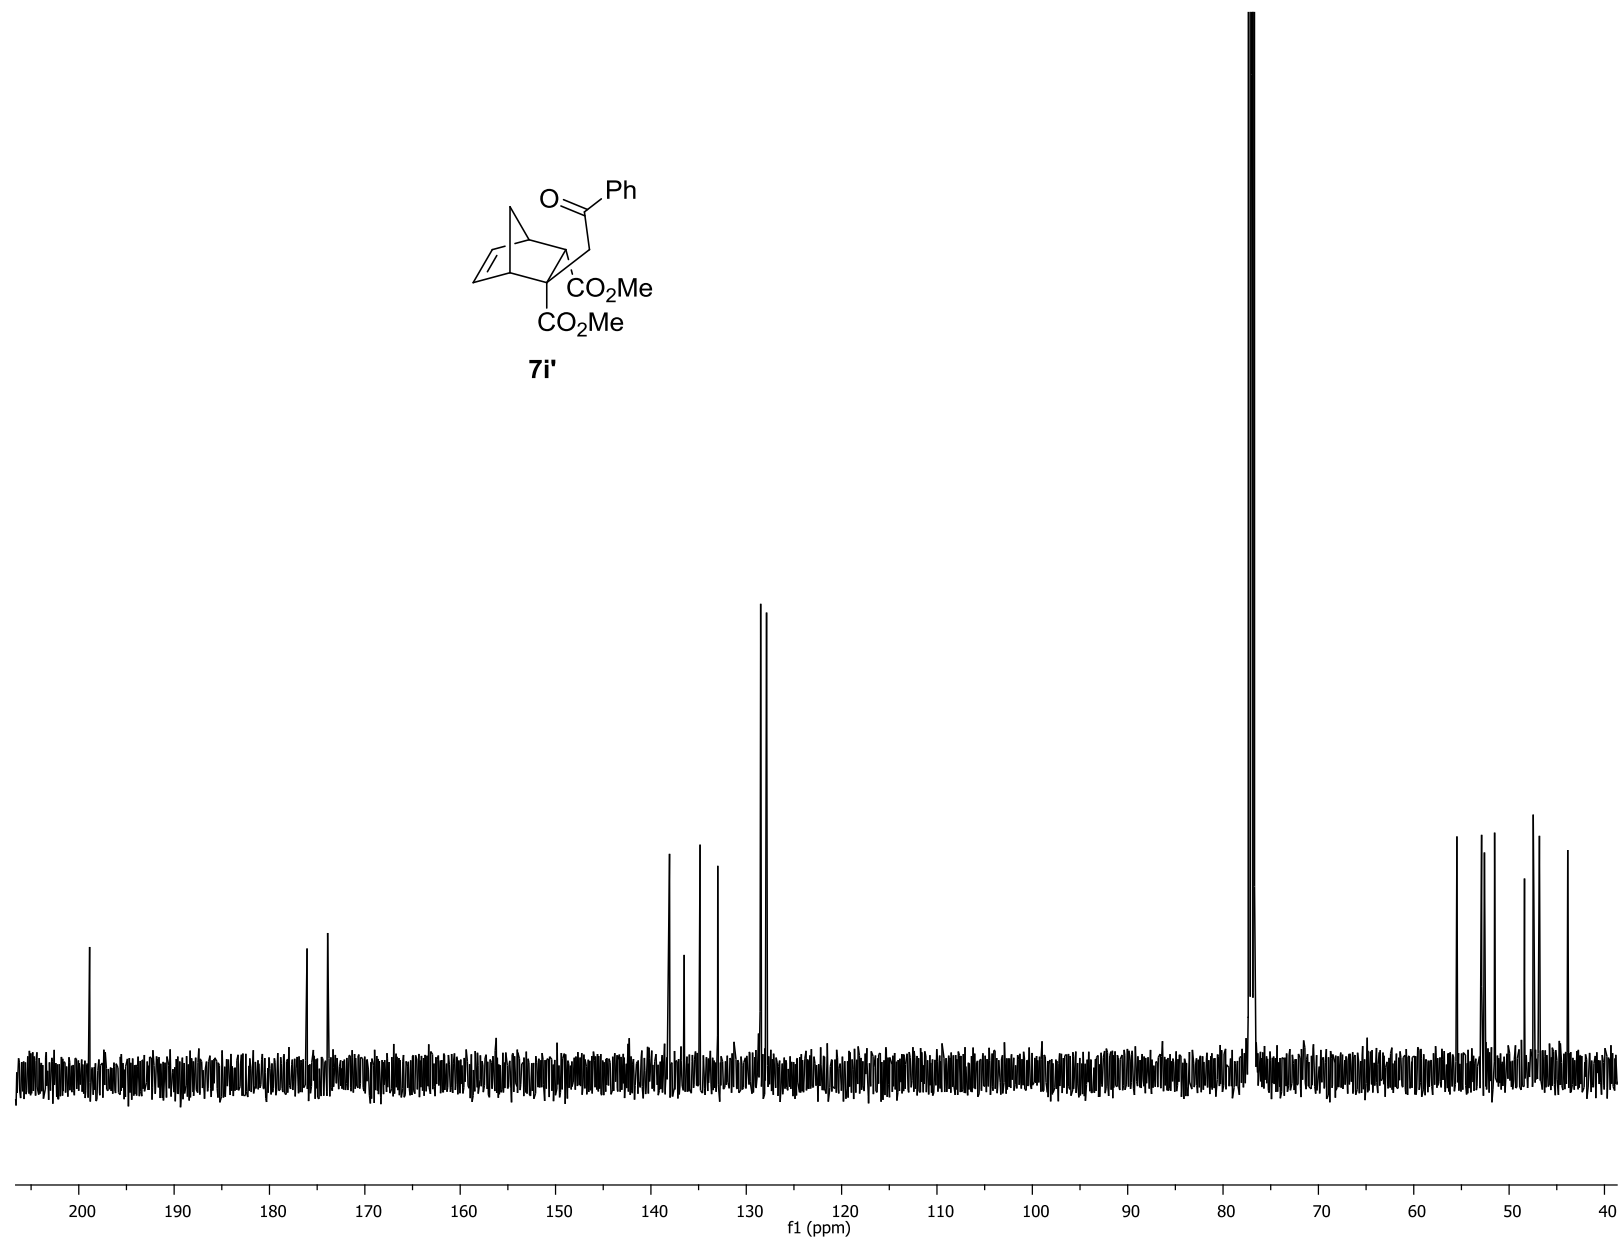

$^1\text{H}$  NMR (500 MHz,  $\text{CDCl}_3$ ):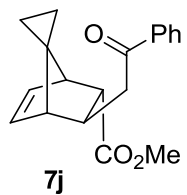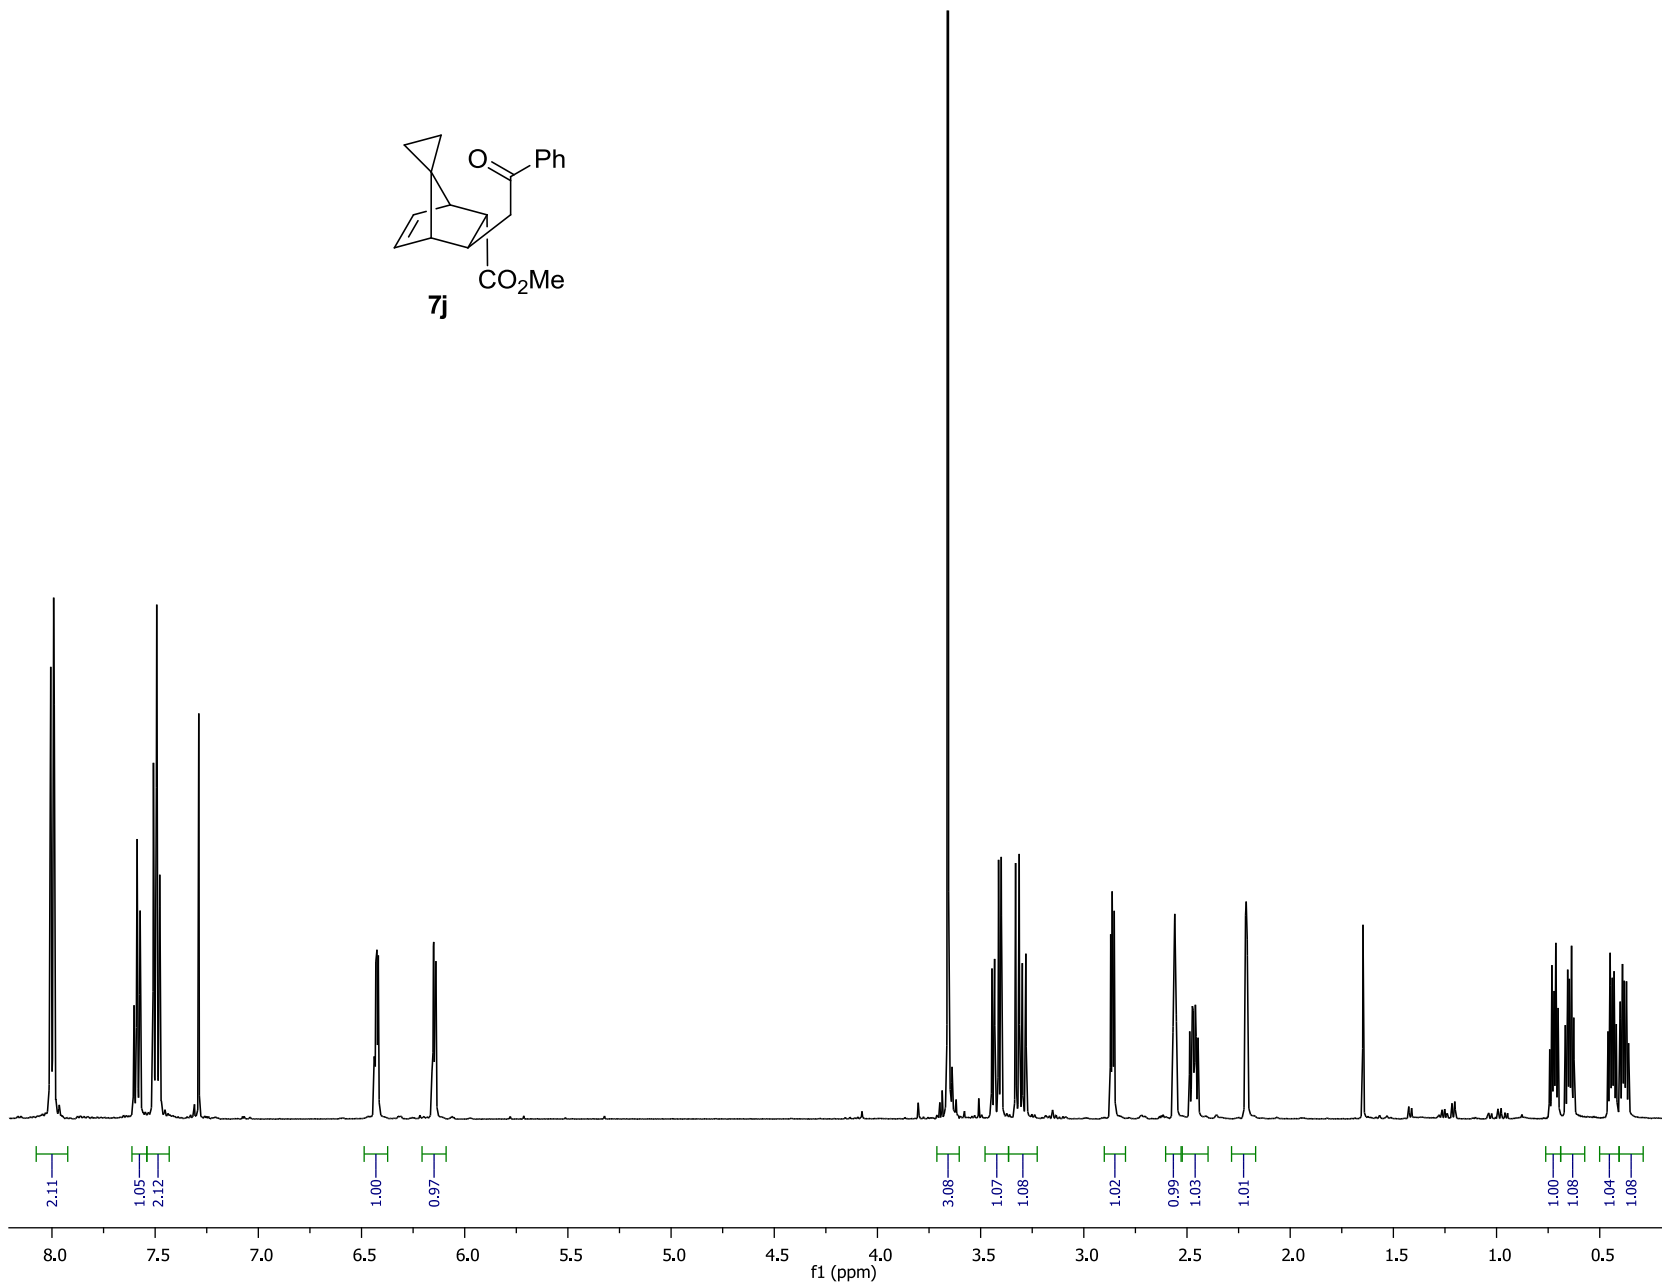

$^1\text{H}$  NMR (500 MHz,  $\text{C}_6\text{D}_6$ ):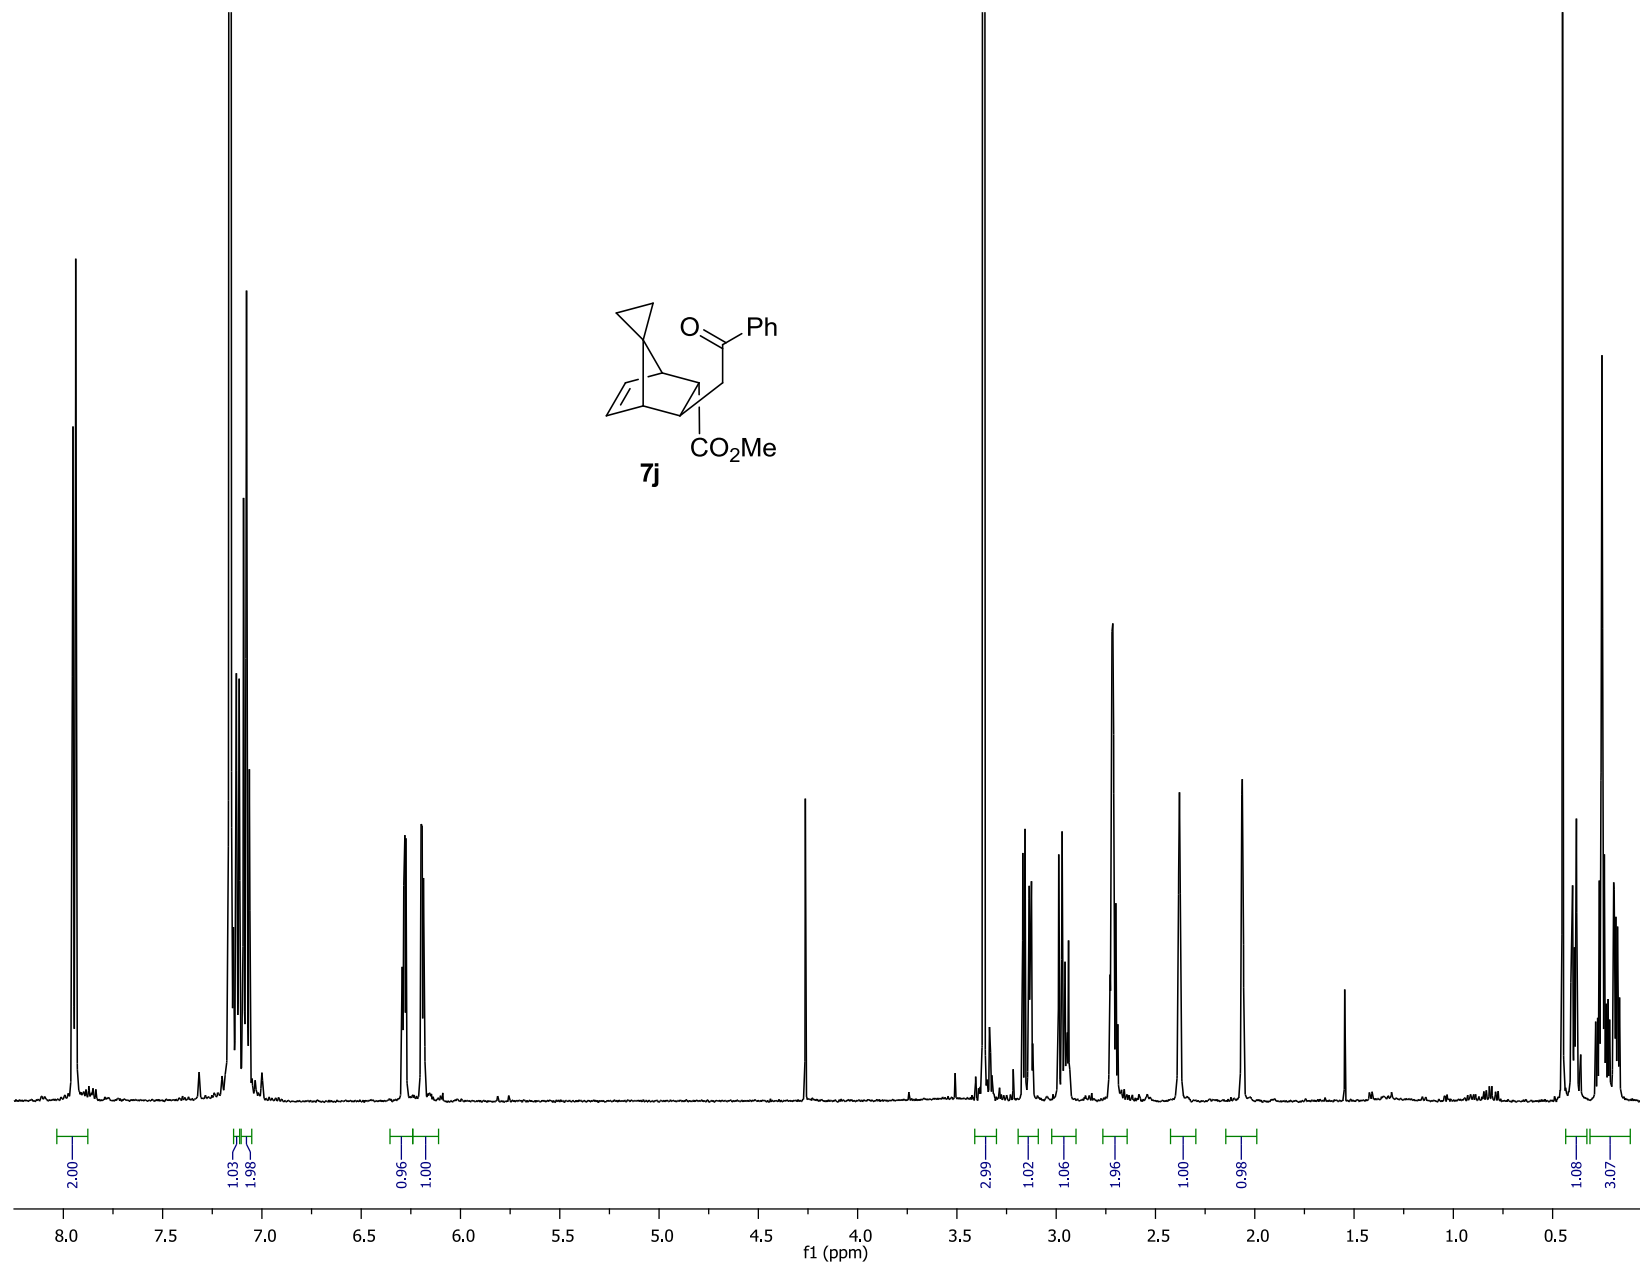

$^{13}\text{C}$  NMR (500 MHz,  $\text{CDCl}_3$ ):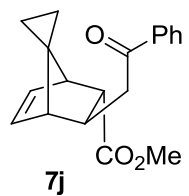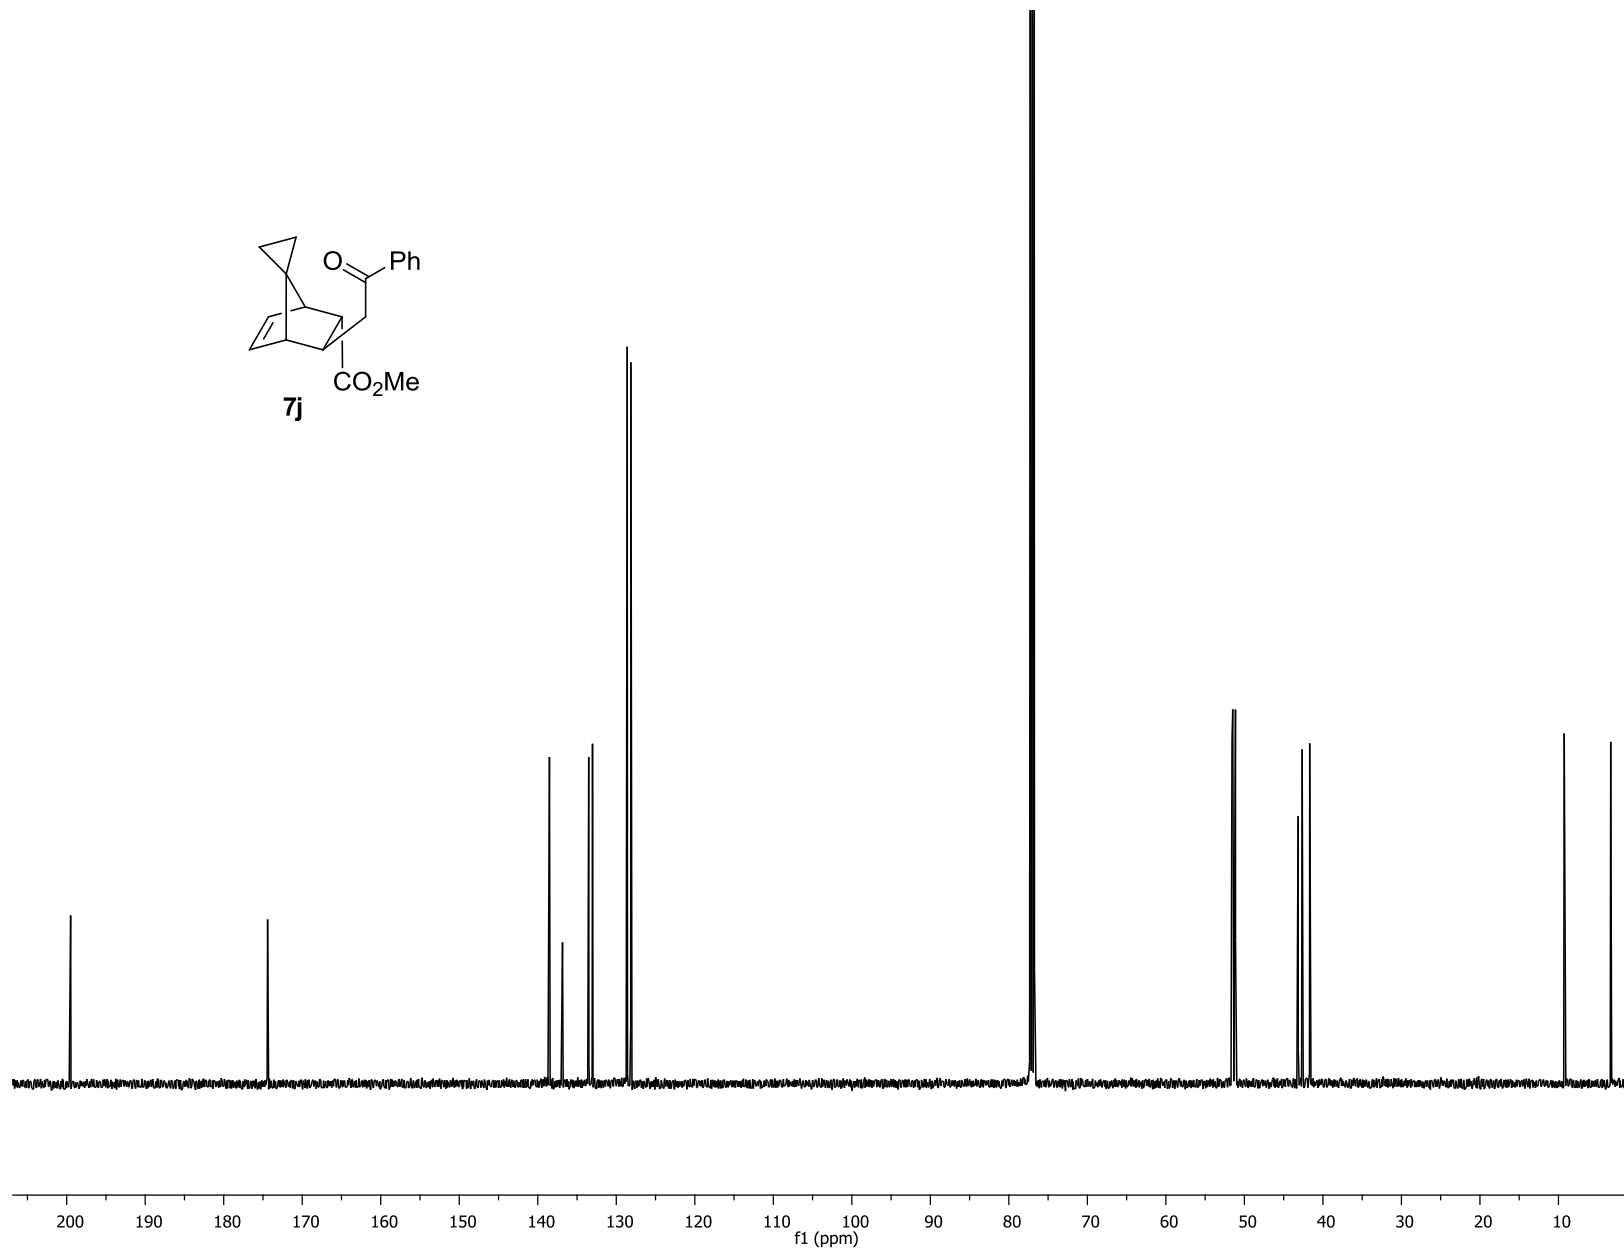

COSY (500 MHz, CDCl<sub>3</sub>):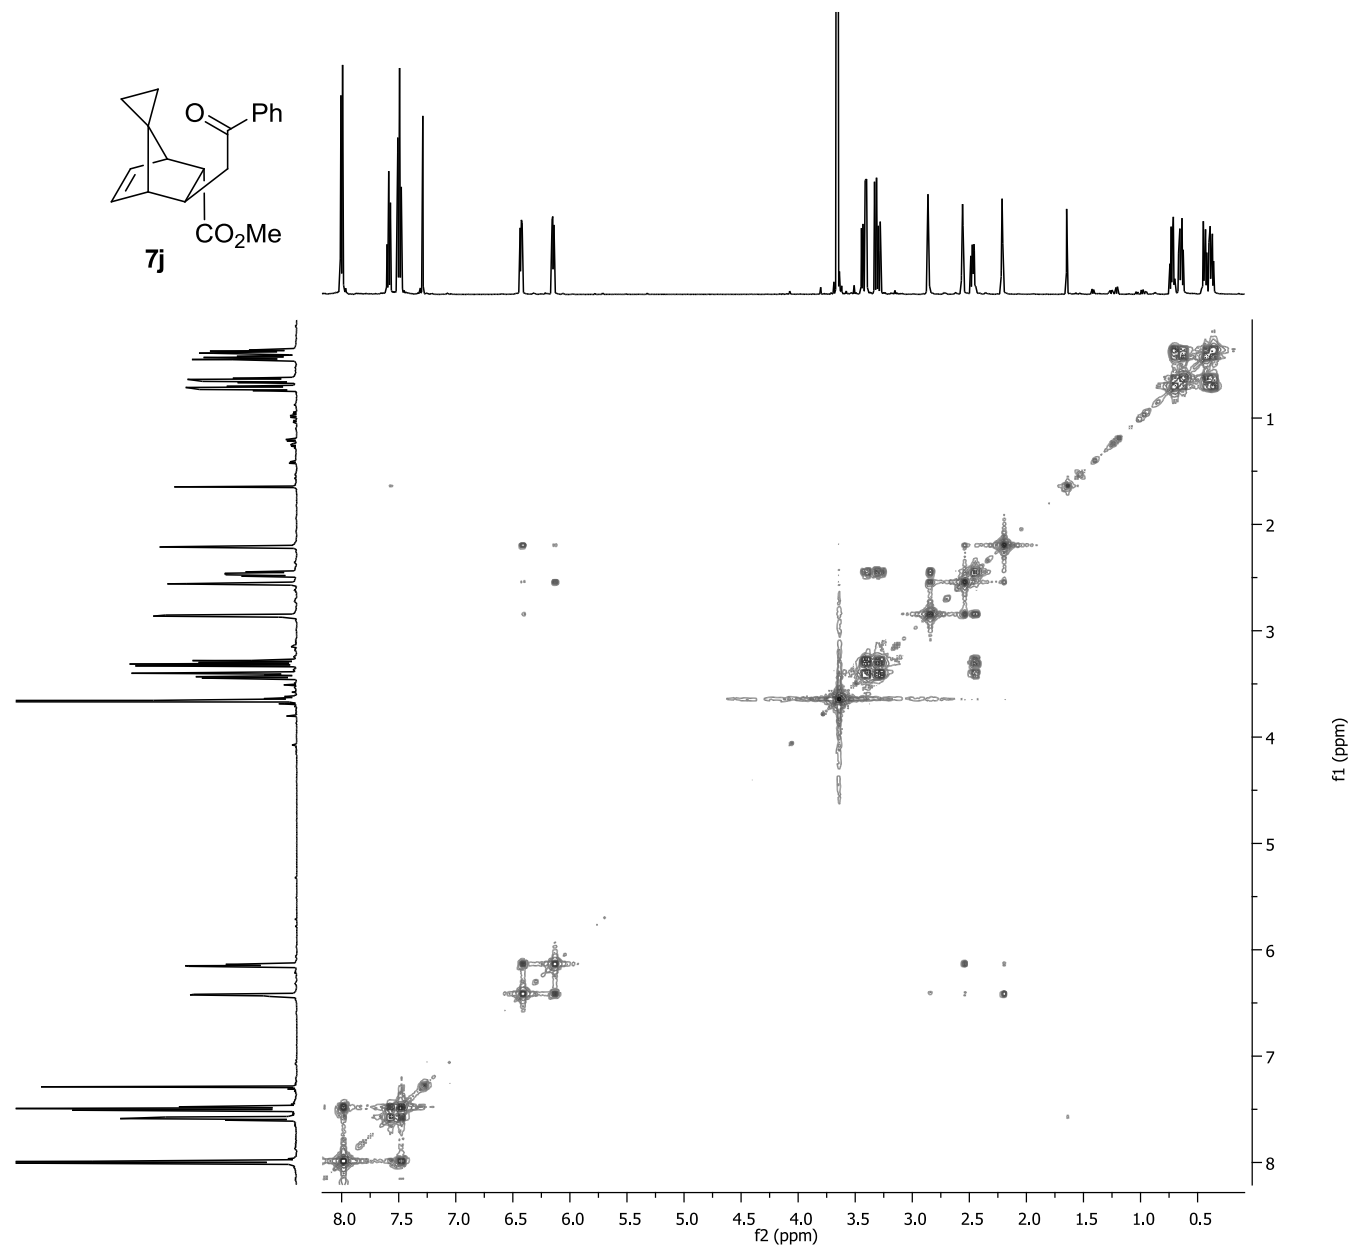

$^1\text{H}$  NMR (500 MHz,  $\text{CDCl}_3$ ):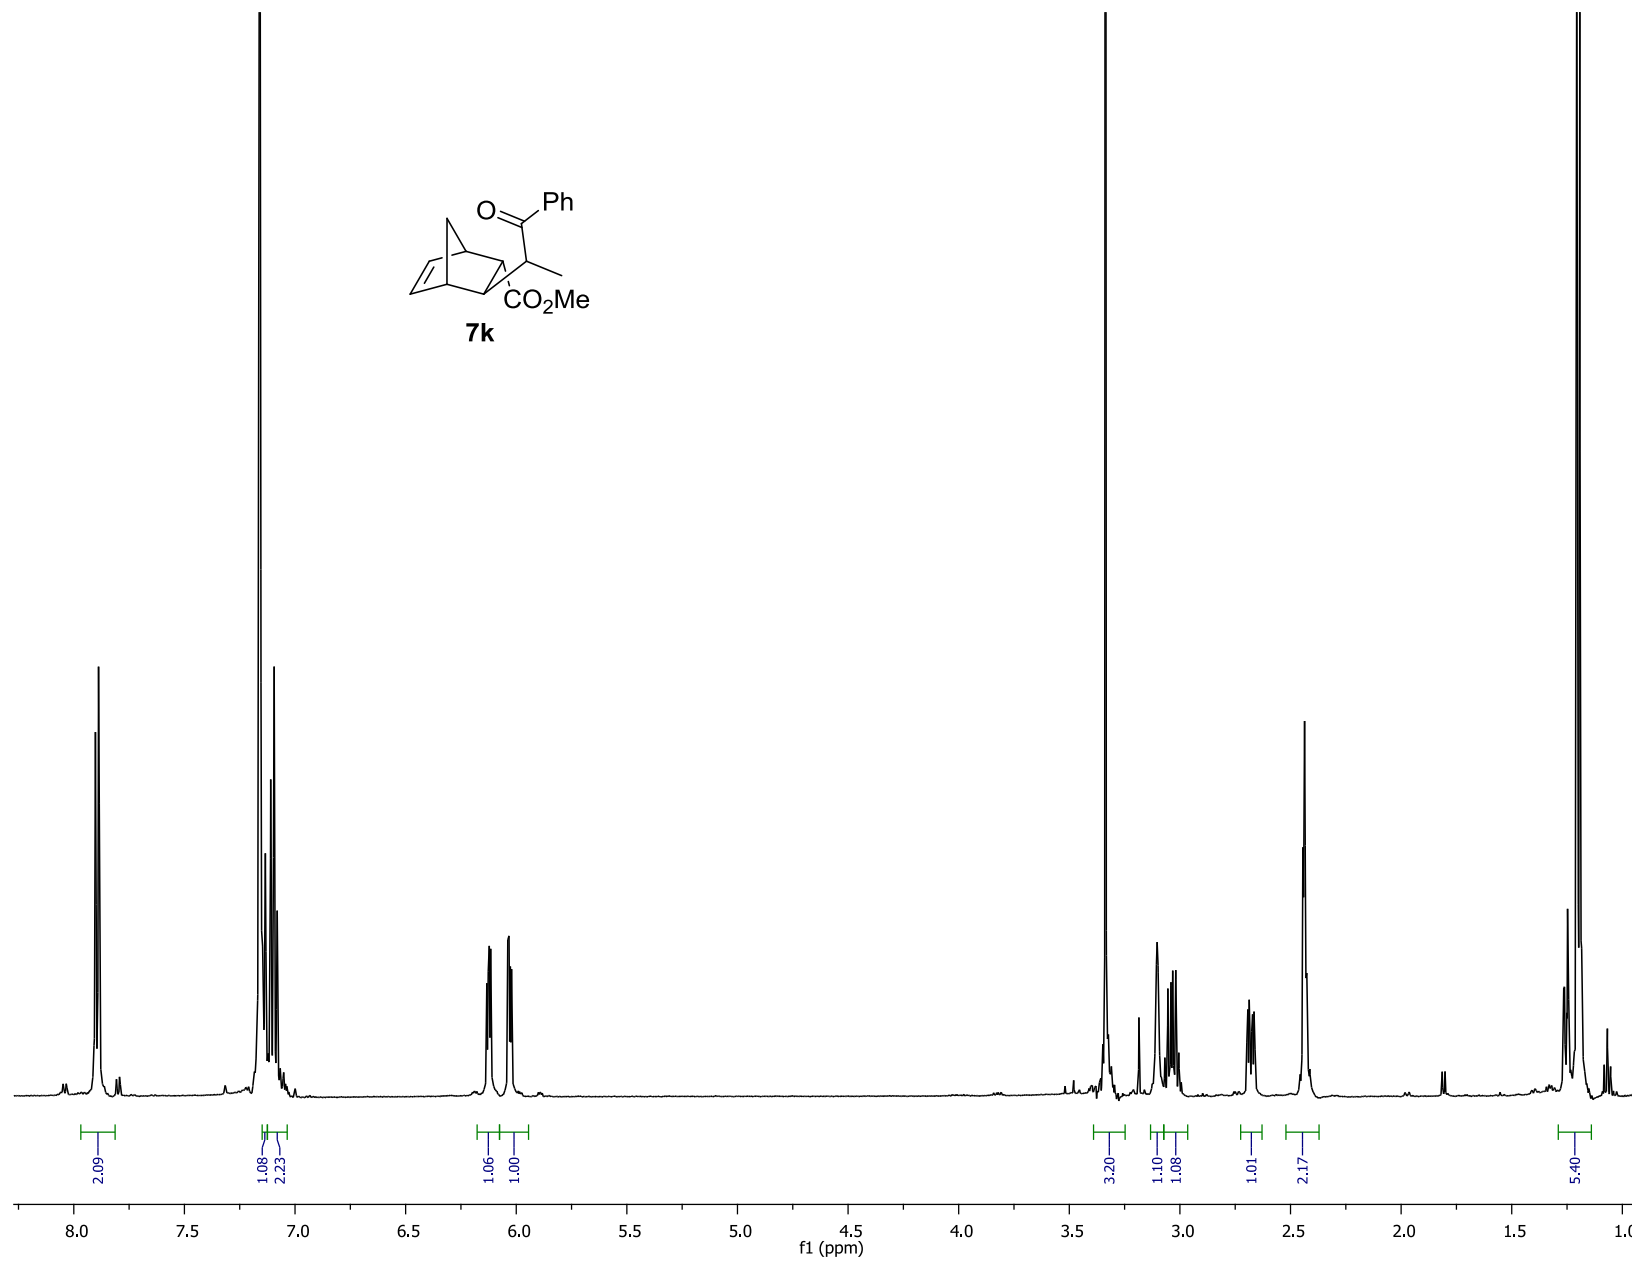



$^{13}\text{C}$  NMR (500 MHz,  $\text{CDCl}_3$ ):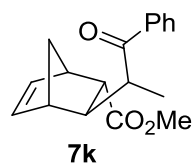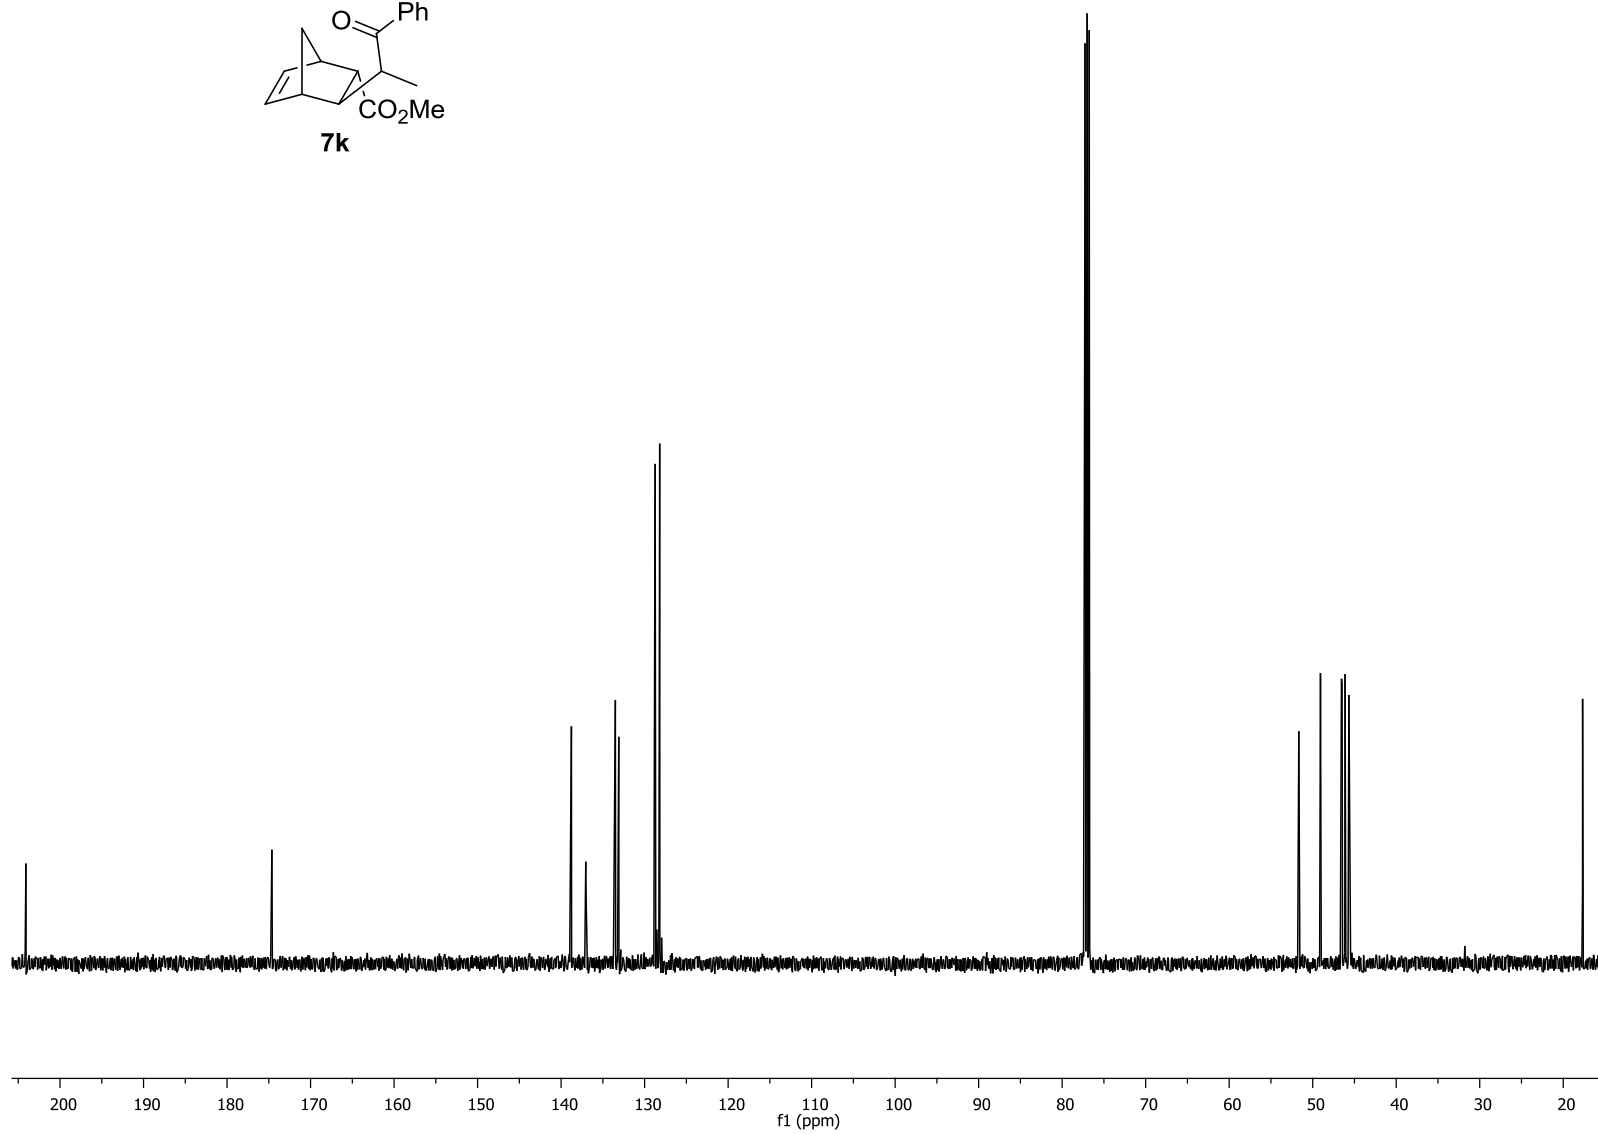

$^1\text{H}$  NMR (500 MHz,  $\text{CDCl}_3$ ):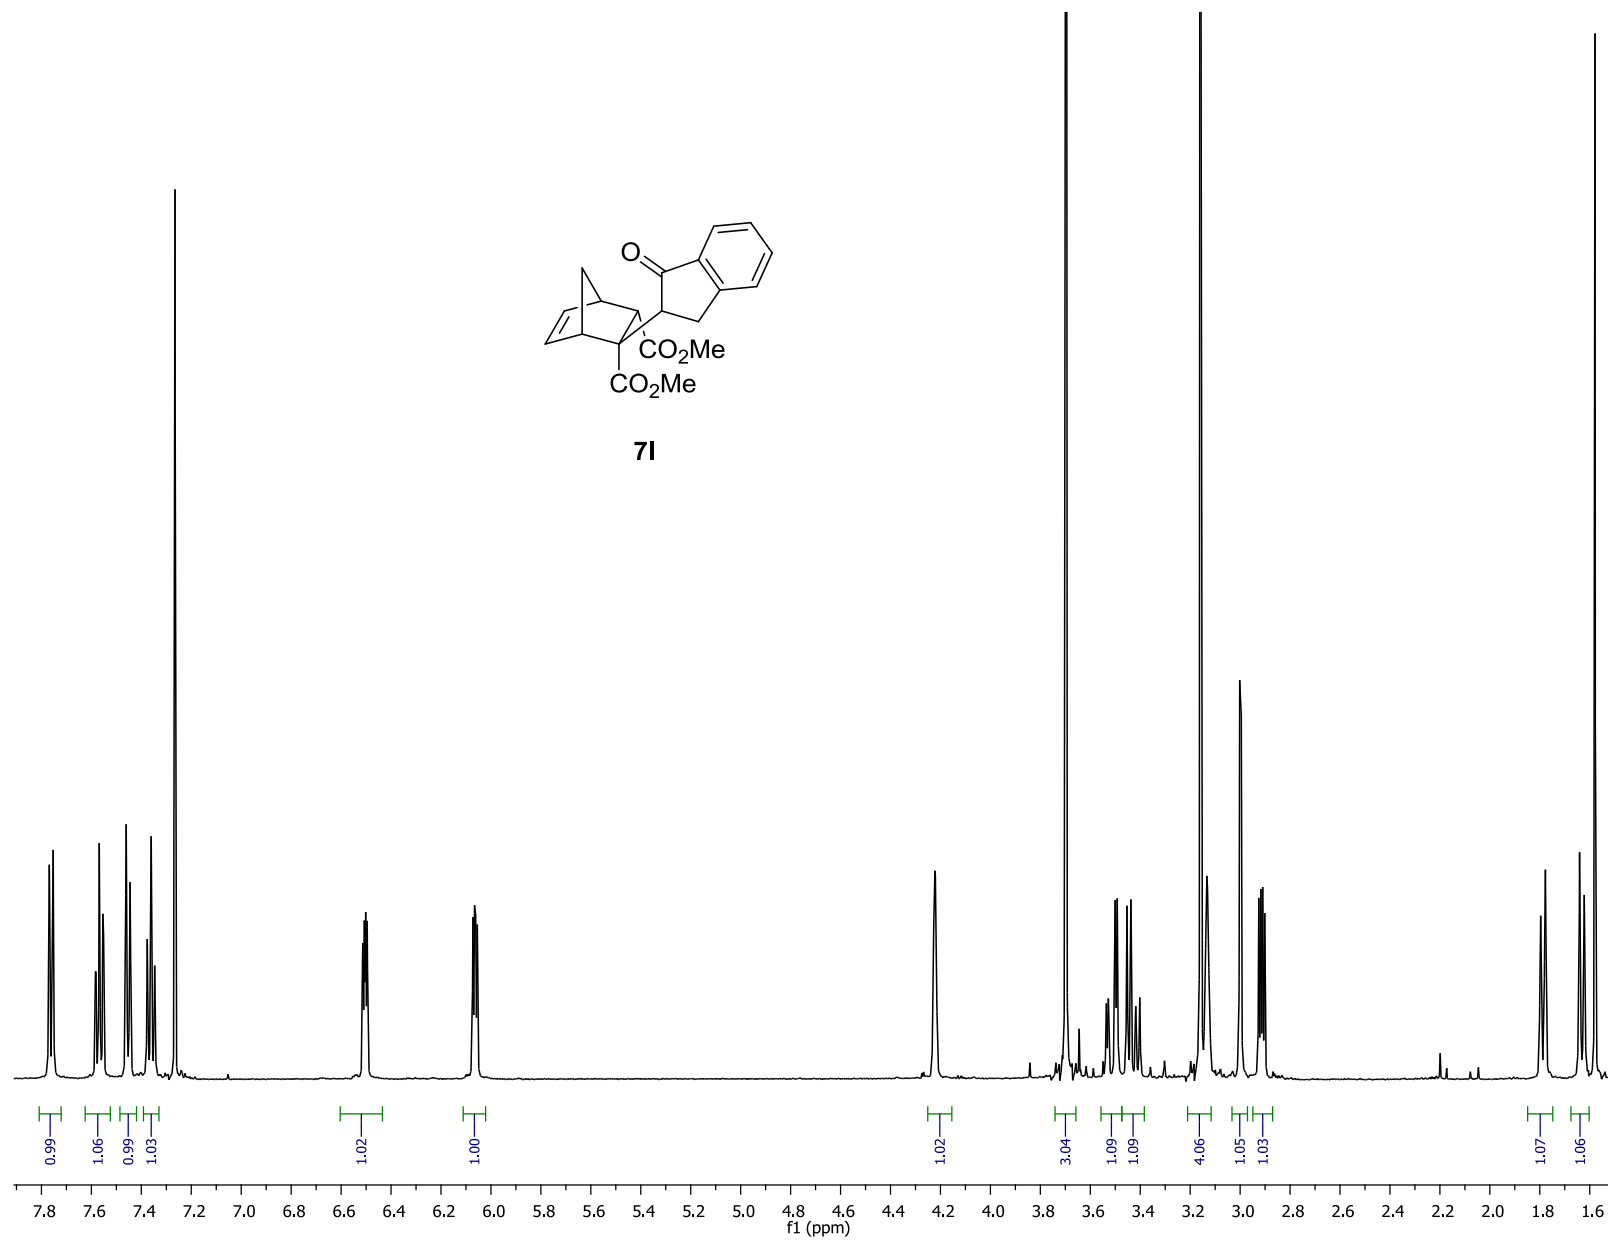

$^1\text{H}$  NMR (500 MHz,  $\text{C}_6\text{D}_6$ ):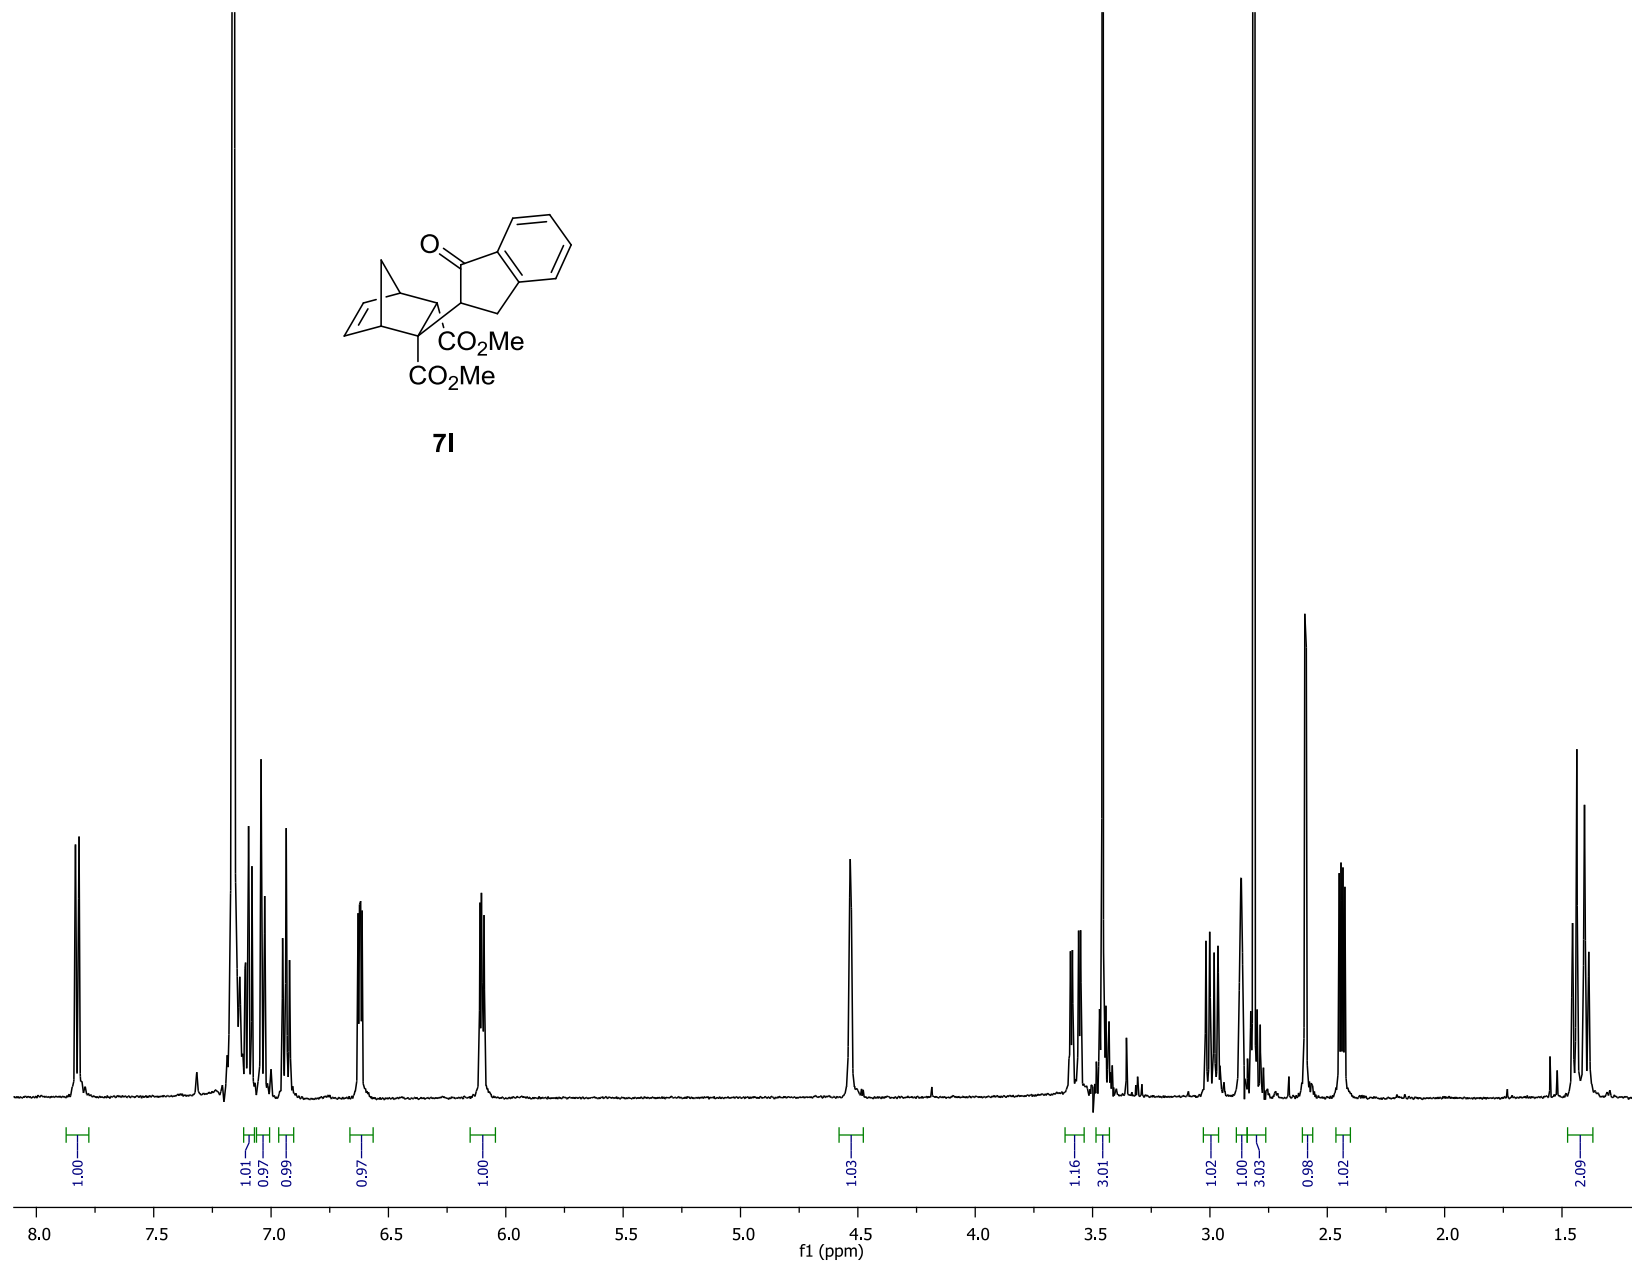

$^{13}\text{C}$  NMR (500 MHz,  $\text{CDCl}_3$ ):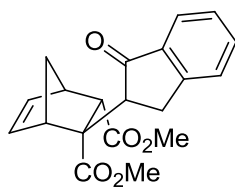

71

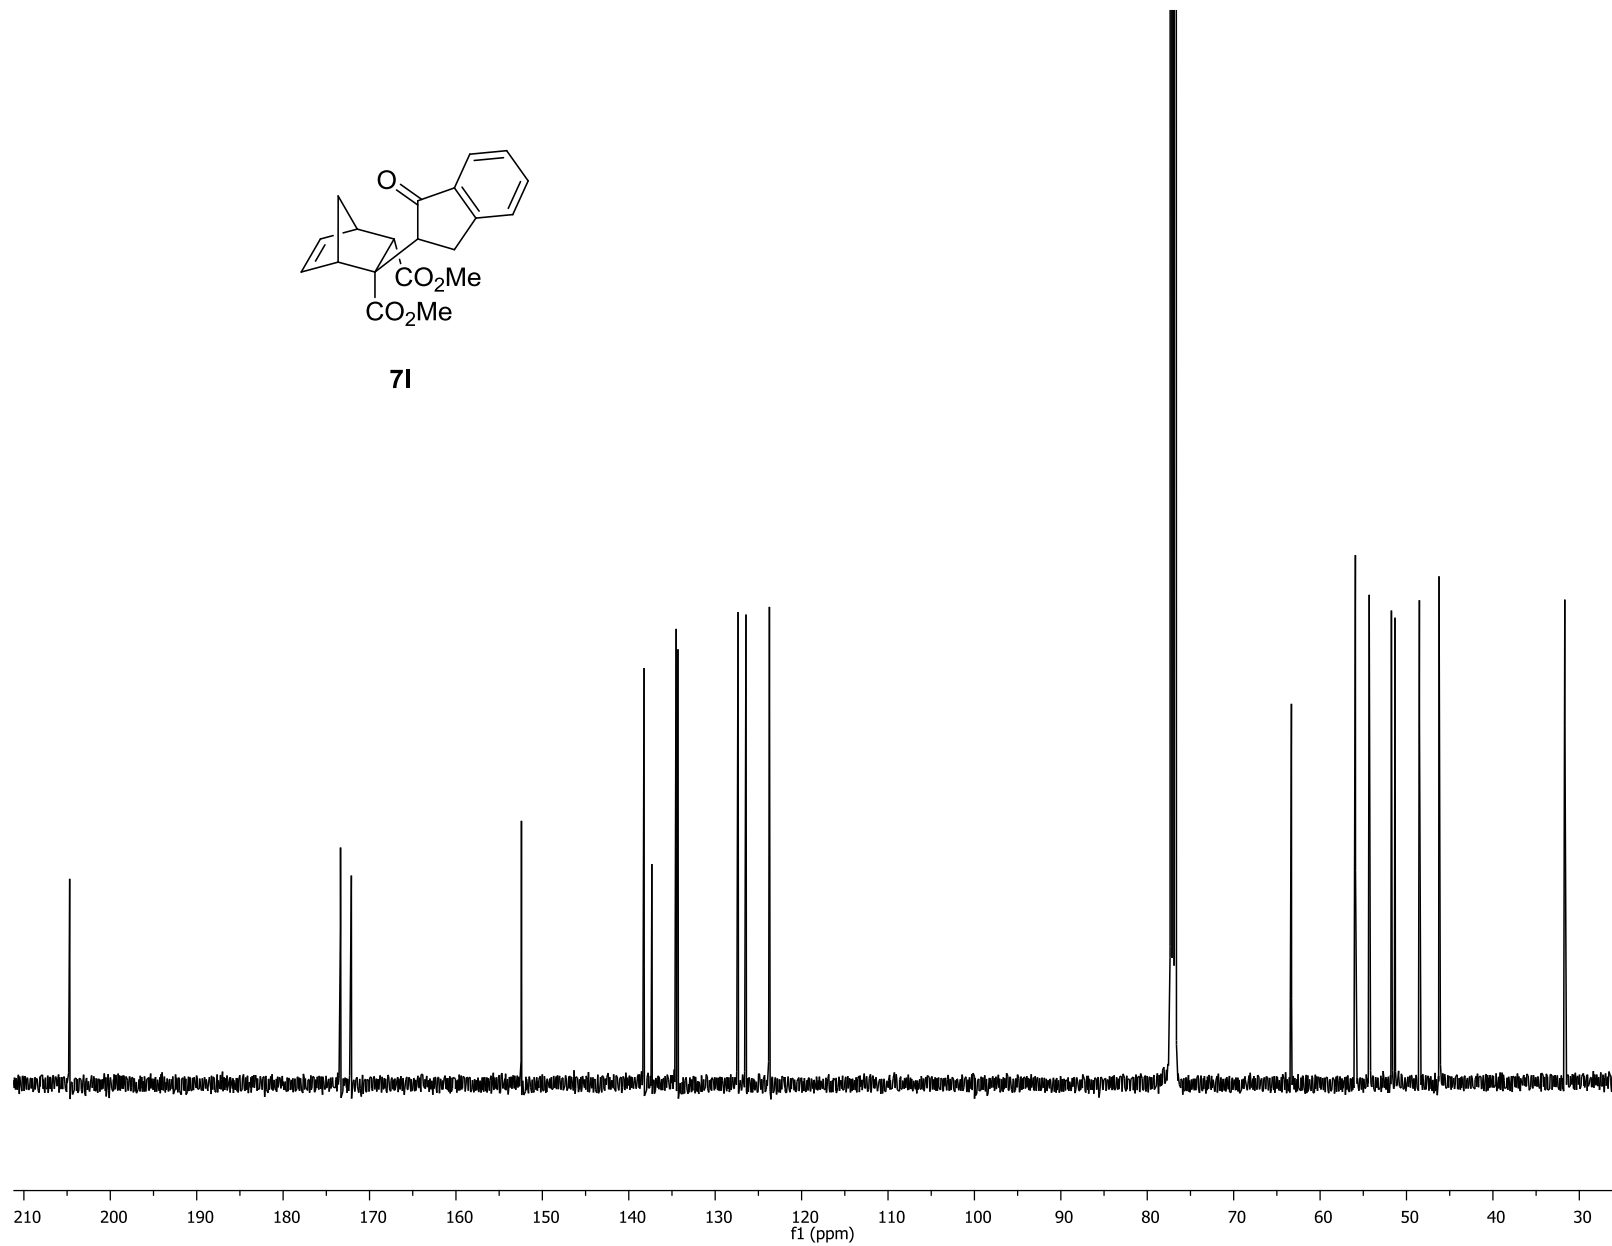

$^1\text{H}$  NMR (500 MHz,  $\text{CDCl}_3$ ):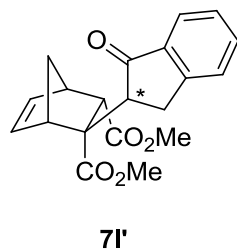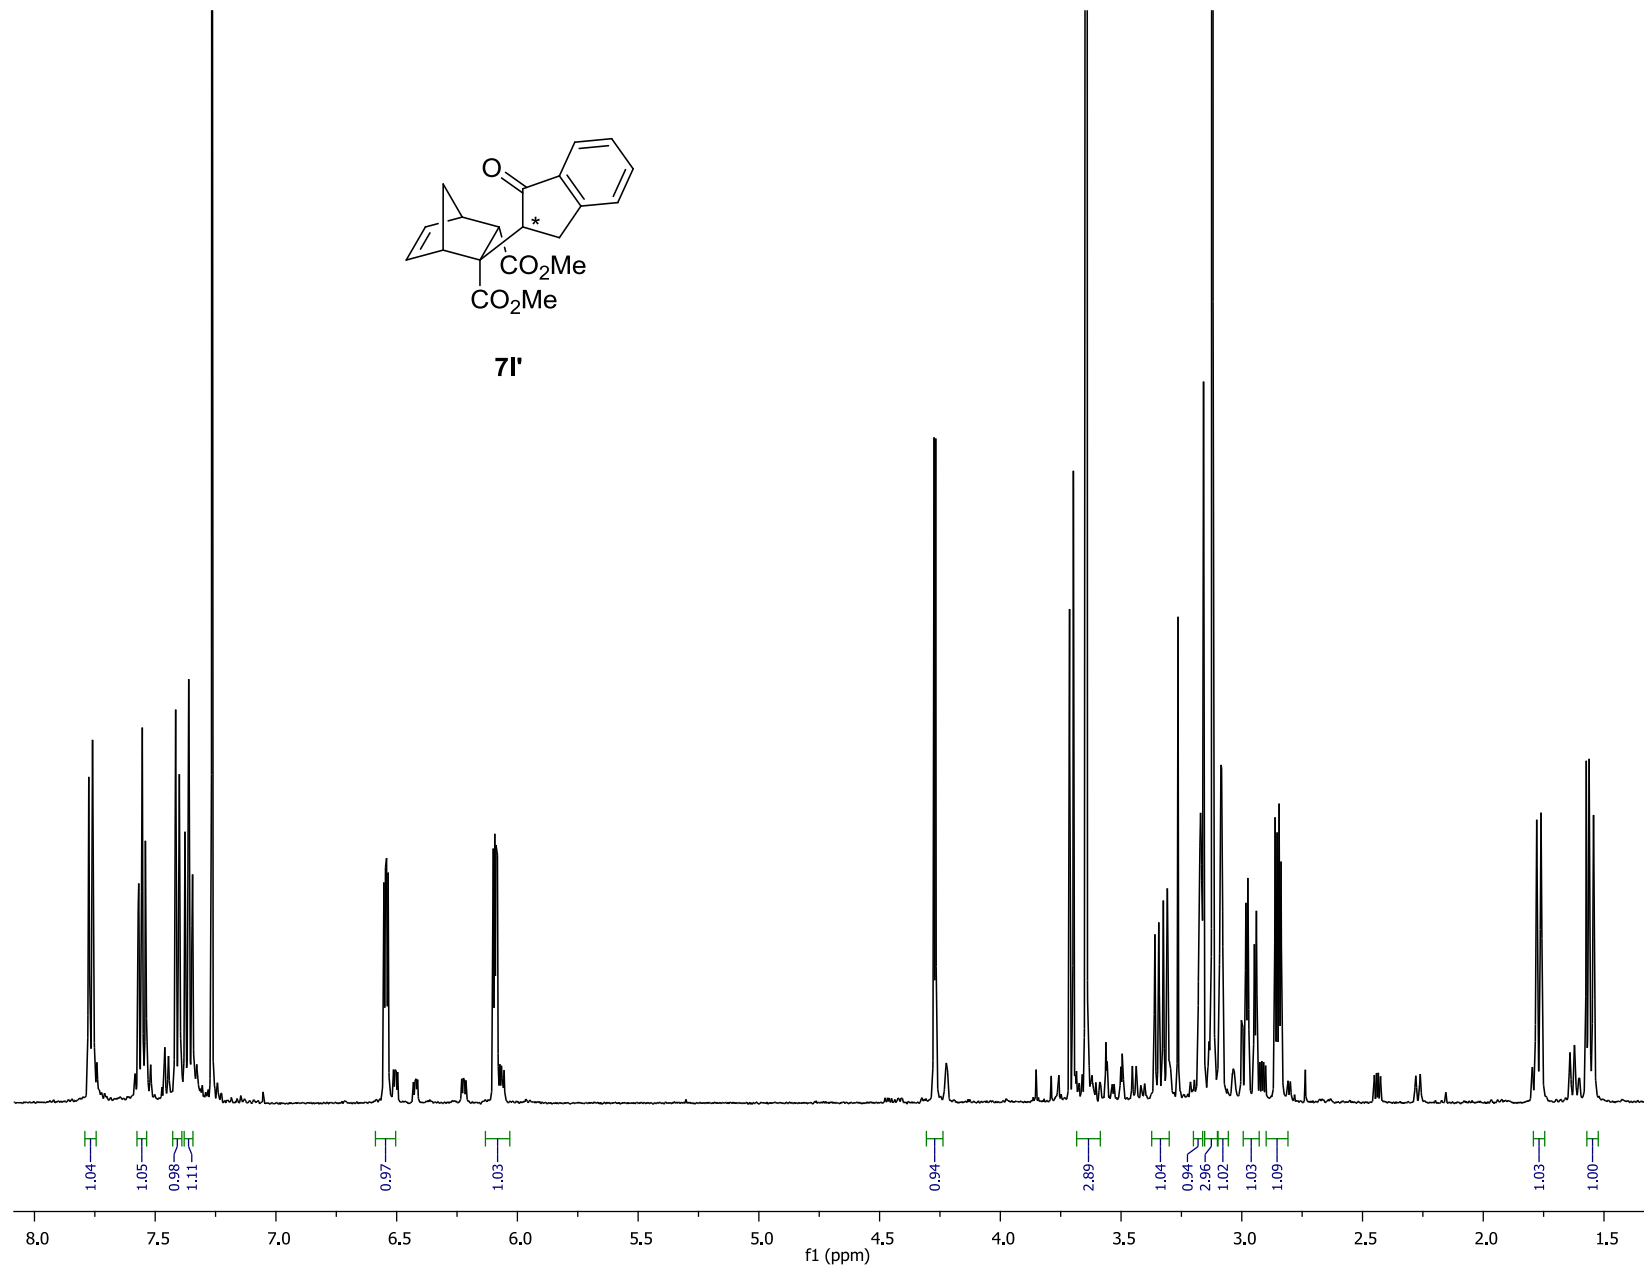

$^{13}\text{C}$  NMR (500 MHz,  $\text{CDCl}_3$ ):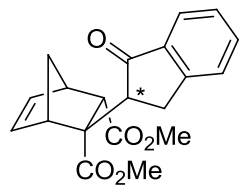

71'

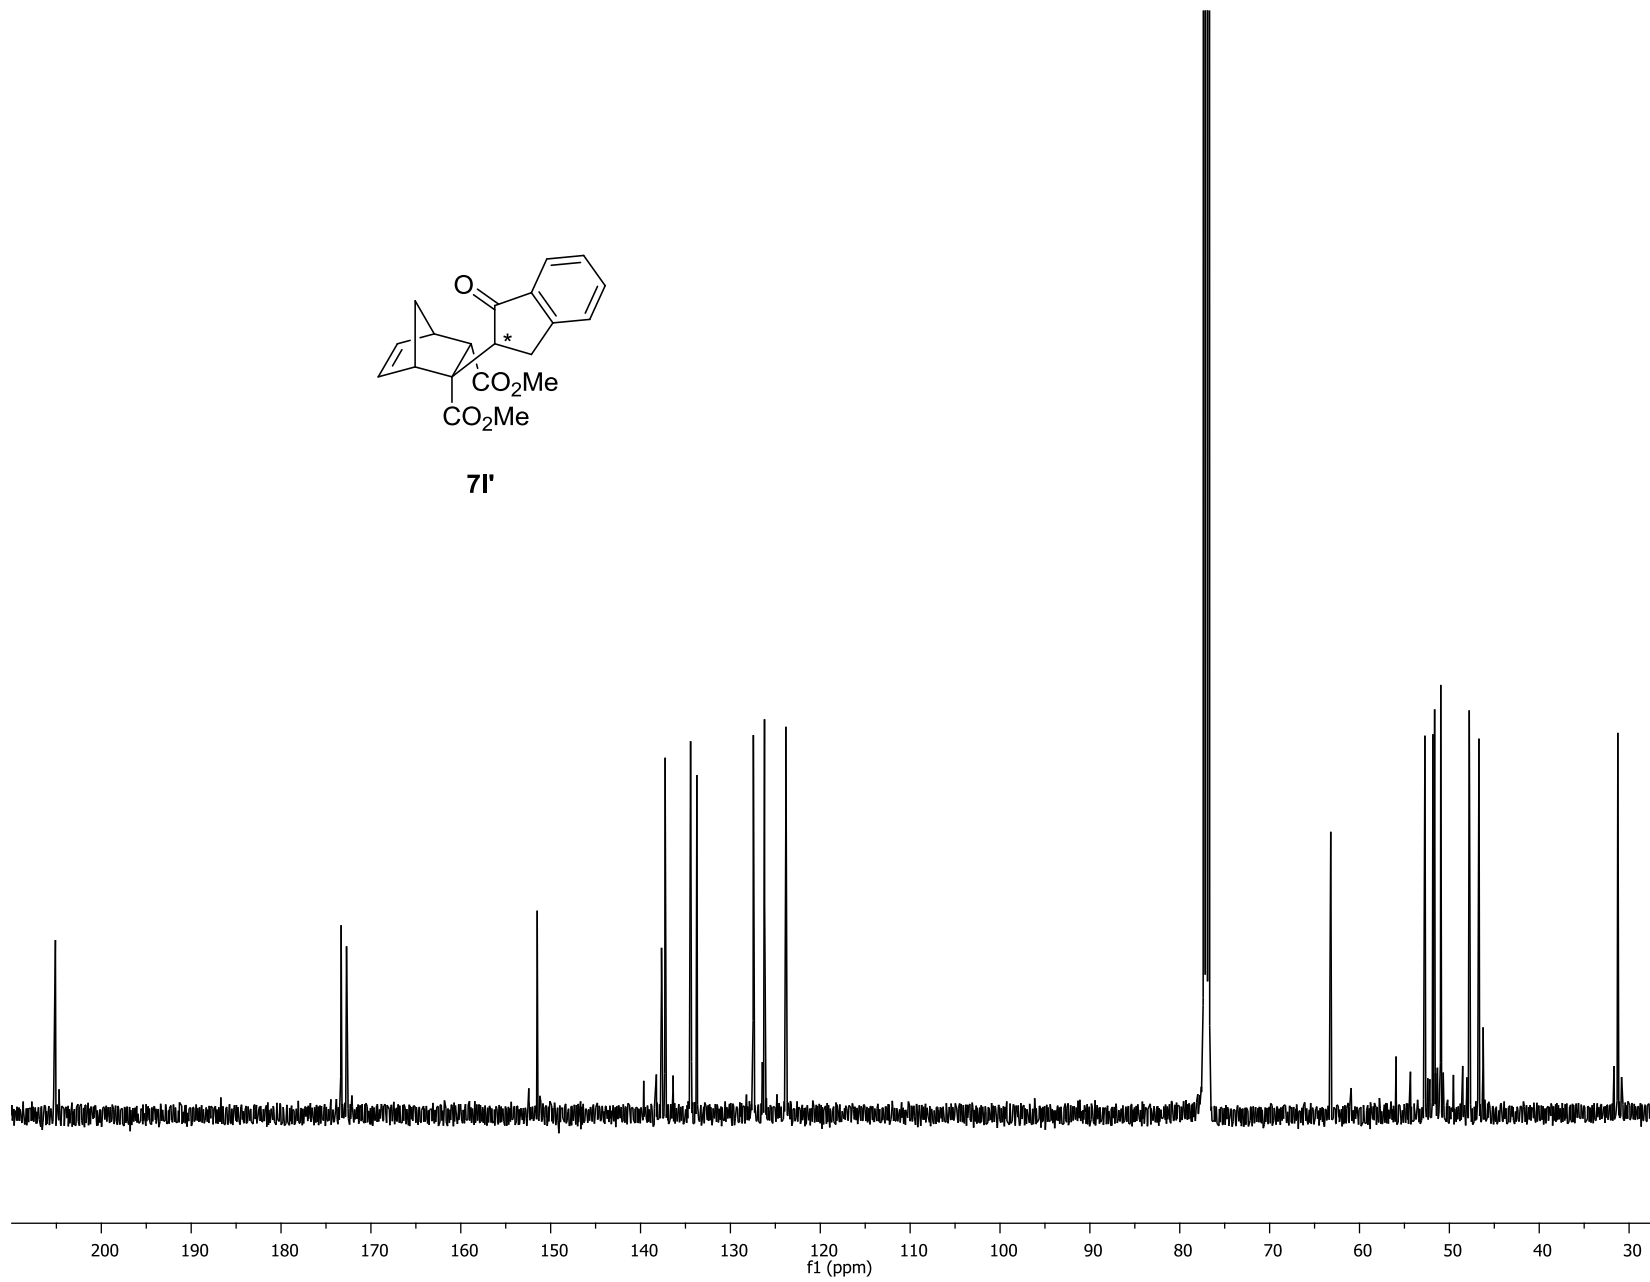

$^1\text{H}$  NMR (500 MHz,  $\text{CDCl}_3$ ):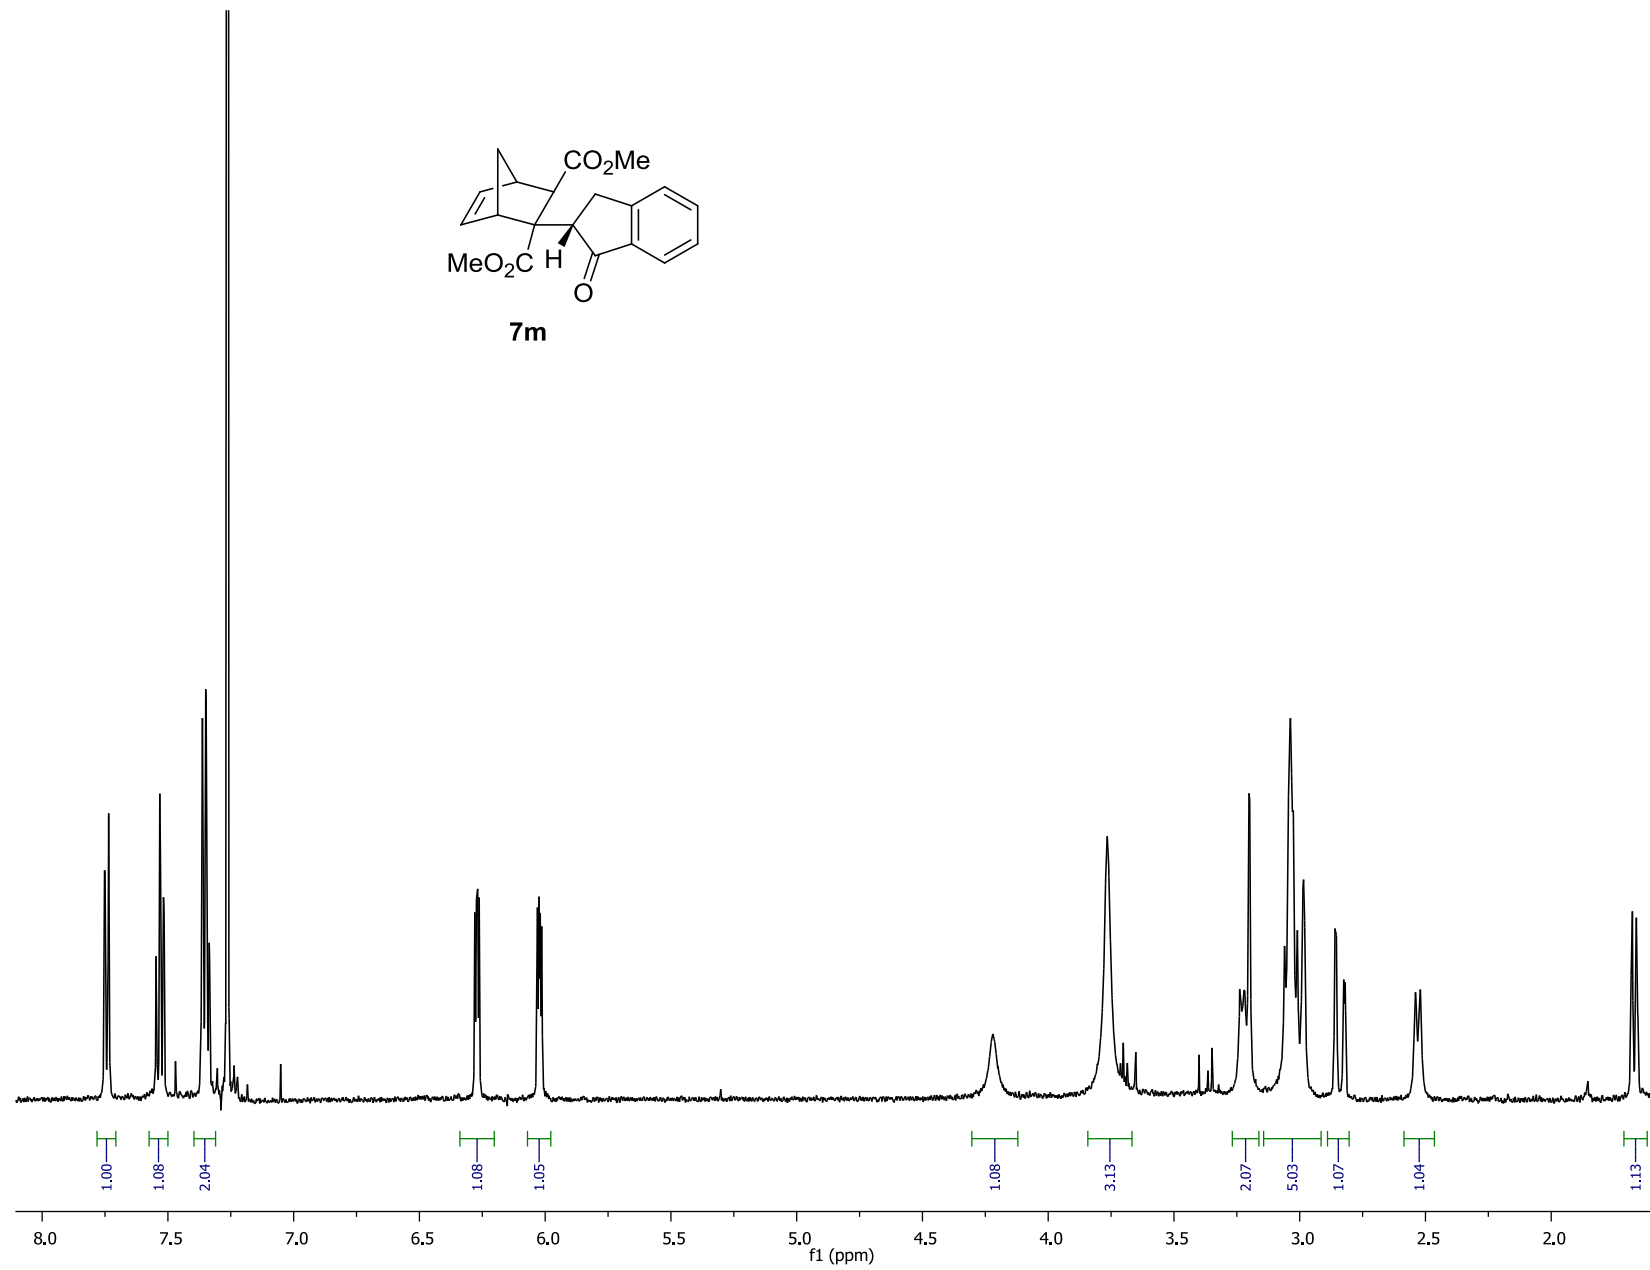

$^{13}\text{C}$  NMR (500 MHz,  $\text{CDCl}_3$ ):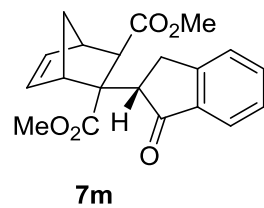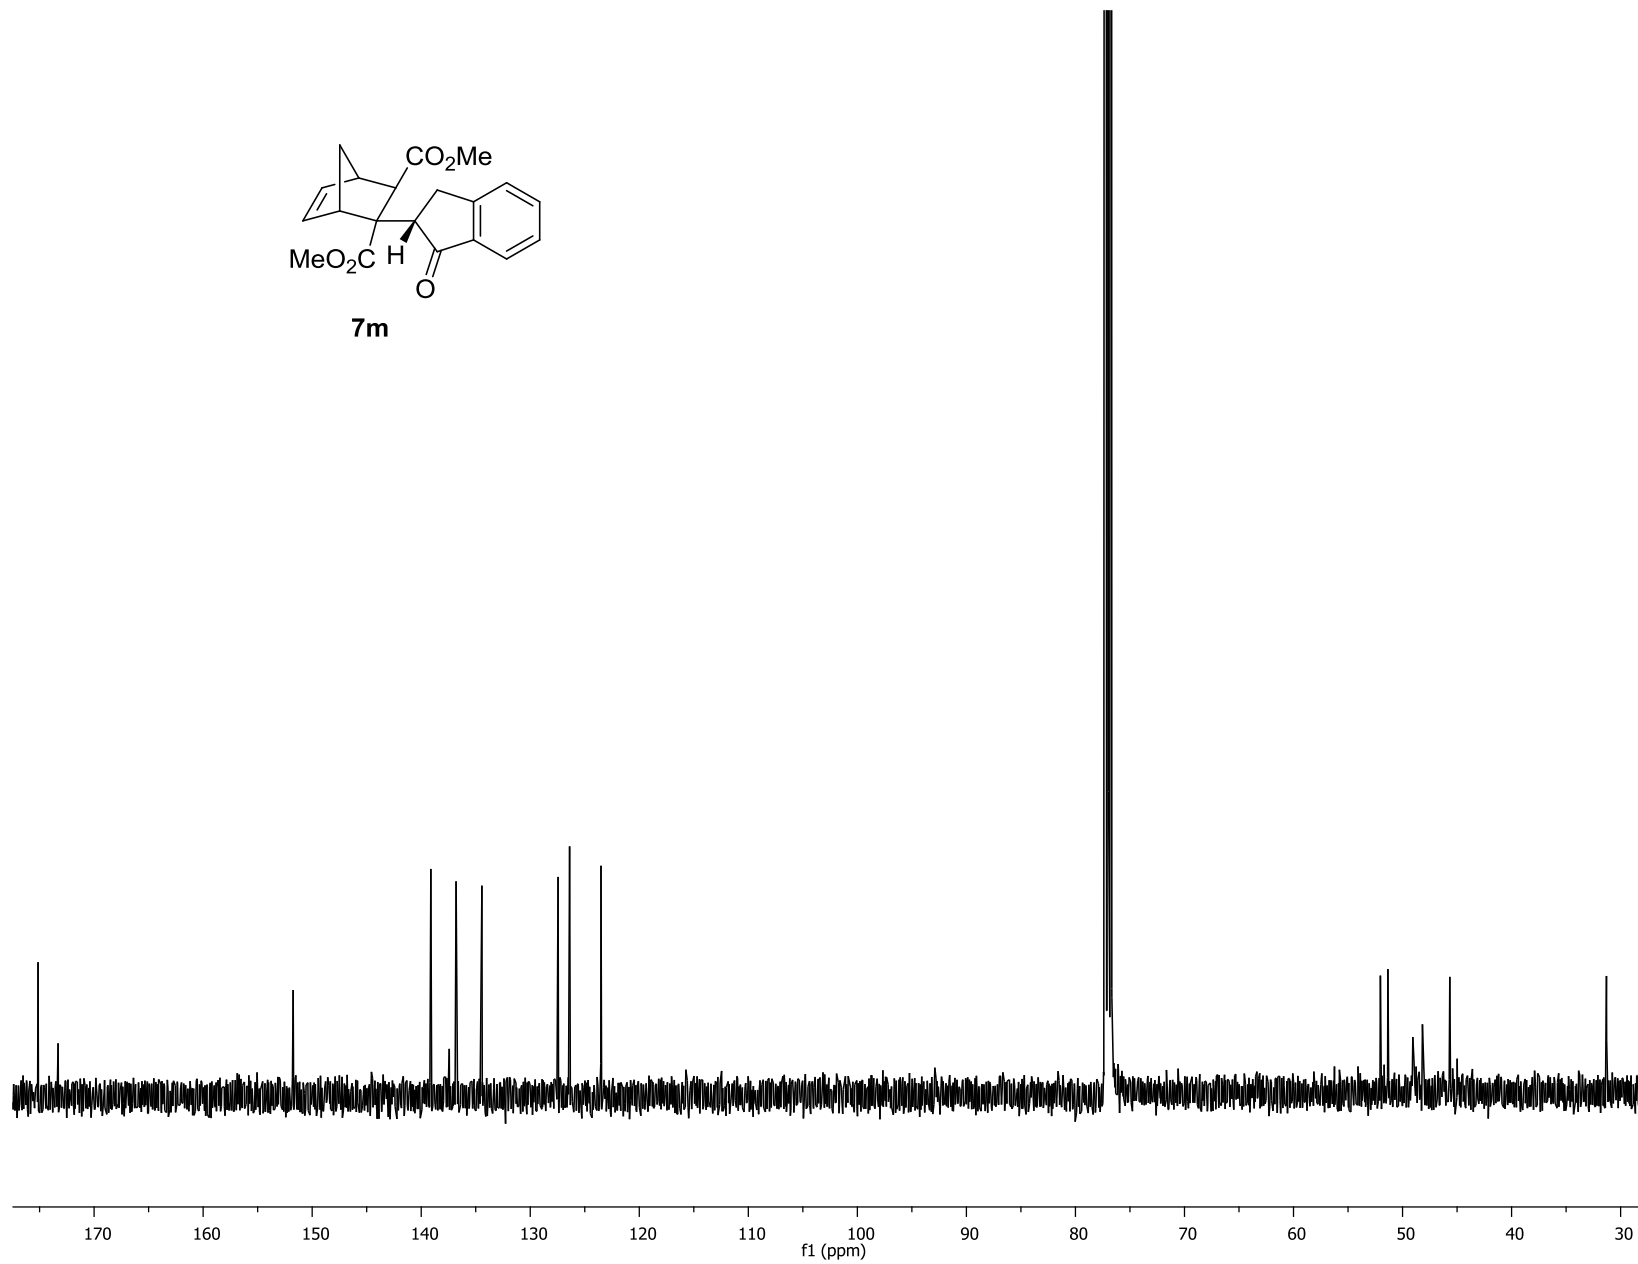



$^1\text{H}$  NMR (500 MHz,  $\text{CDCl}_3$ ):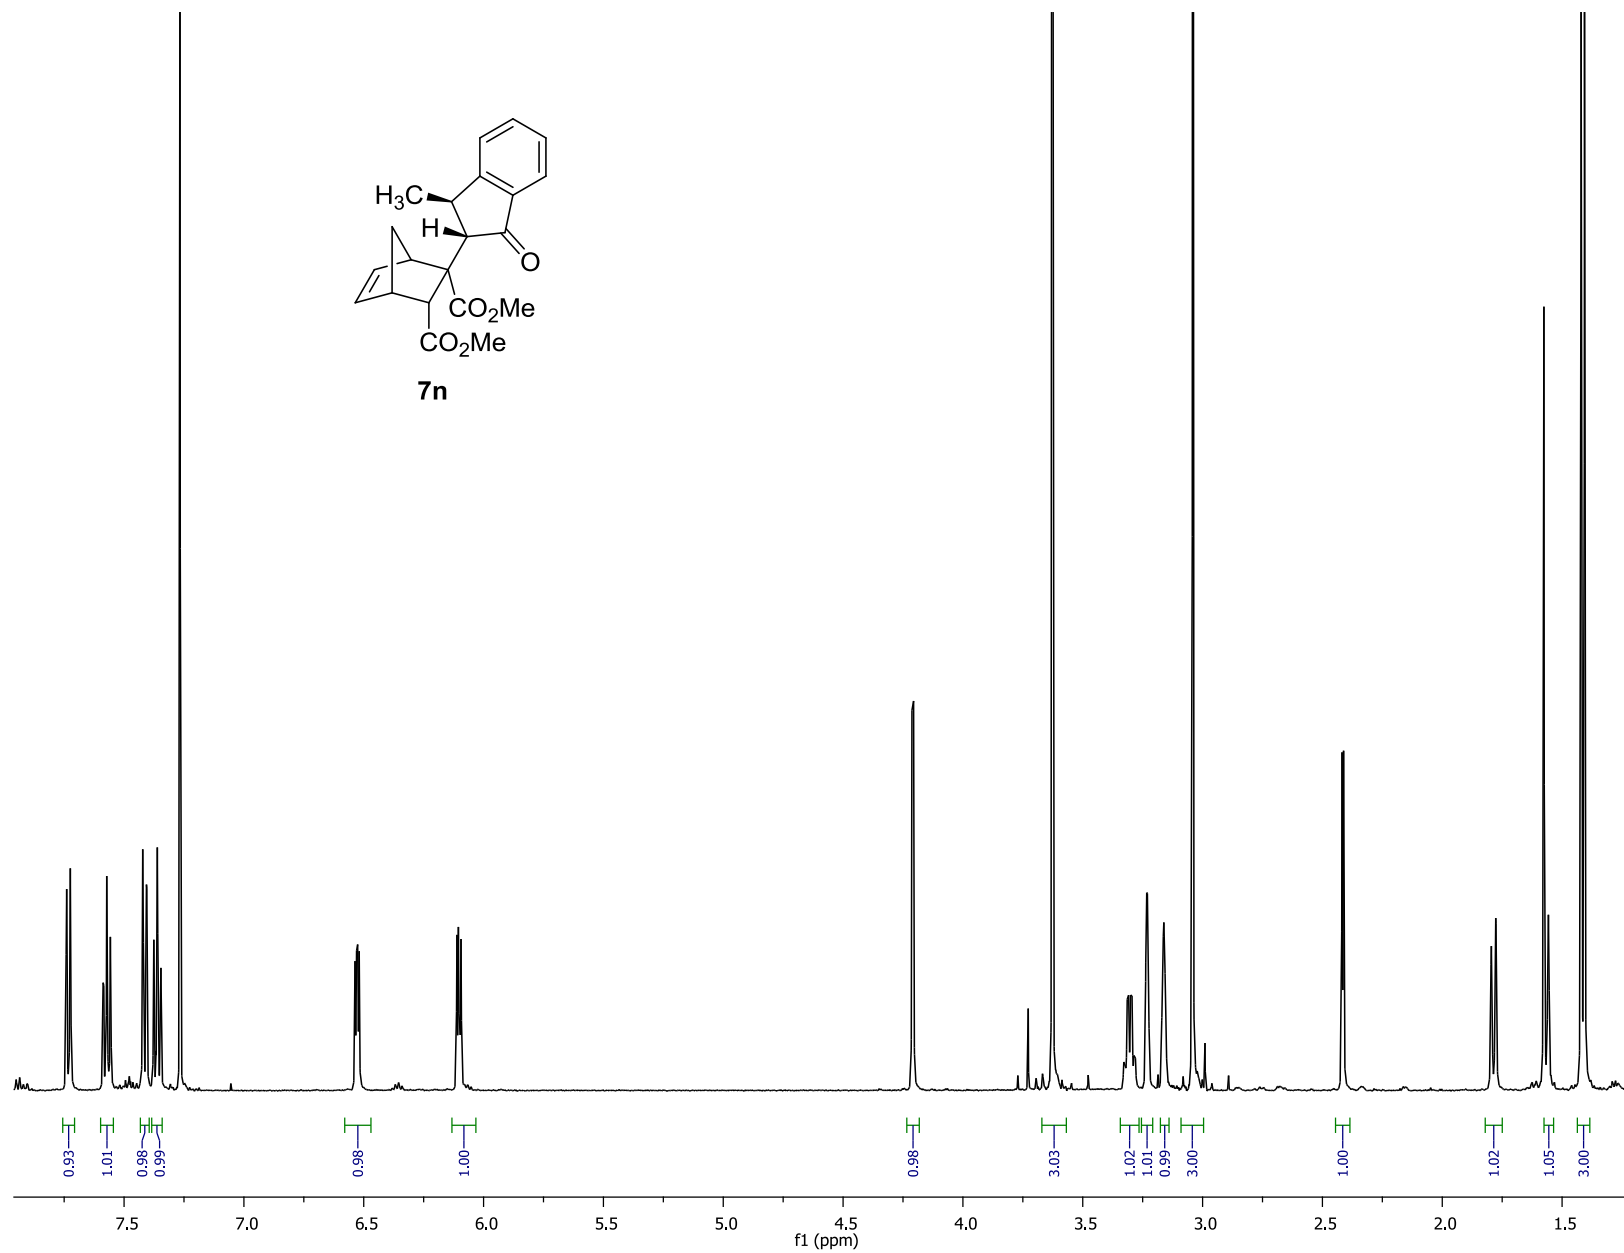

$^{13}\text{C}$  NMR (500 MHz,  $\text{CDCl}_3$ ):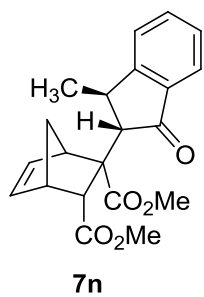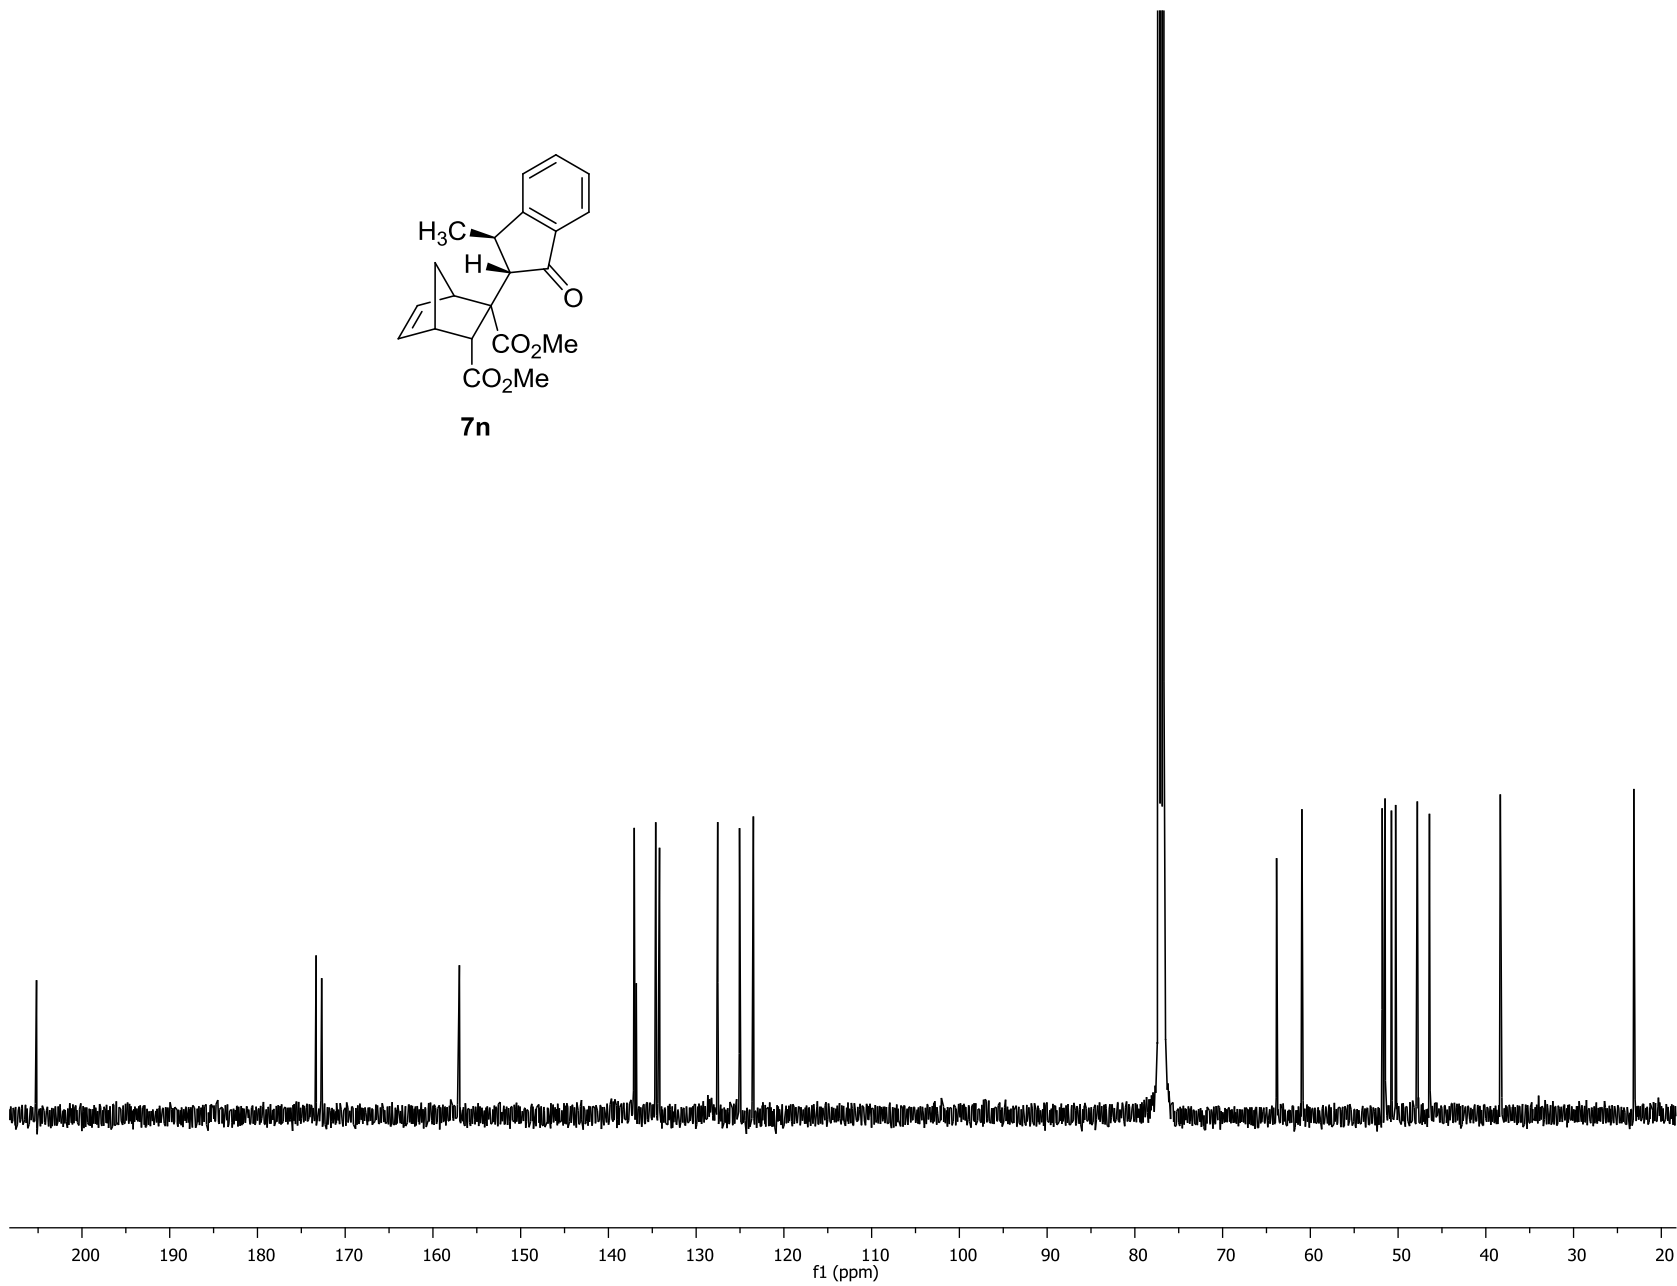

COSY (500 MHz, CDCl<sub>3</sub>):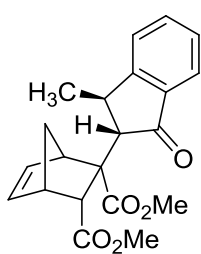

7n

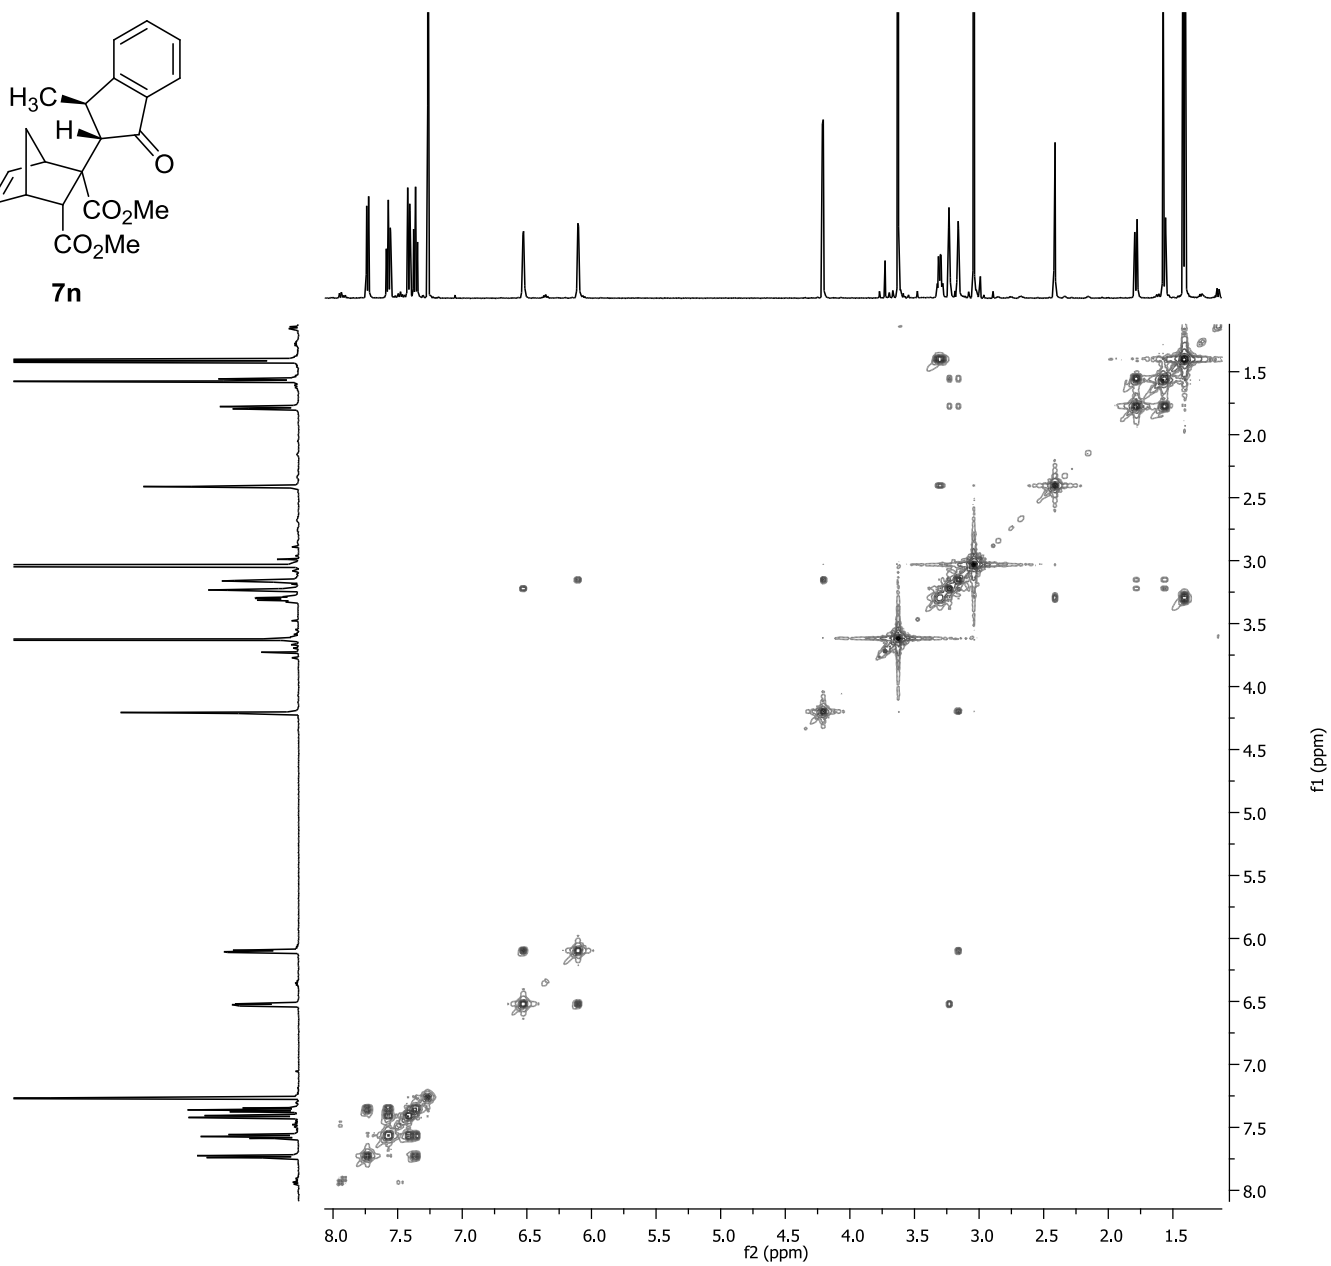

$^1\text{H}$  NMR (500 MHz,  $\text{CDCl}_3$ ):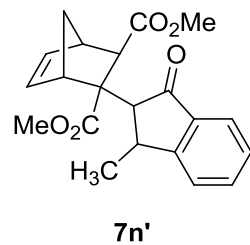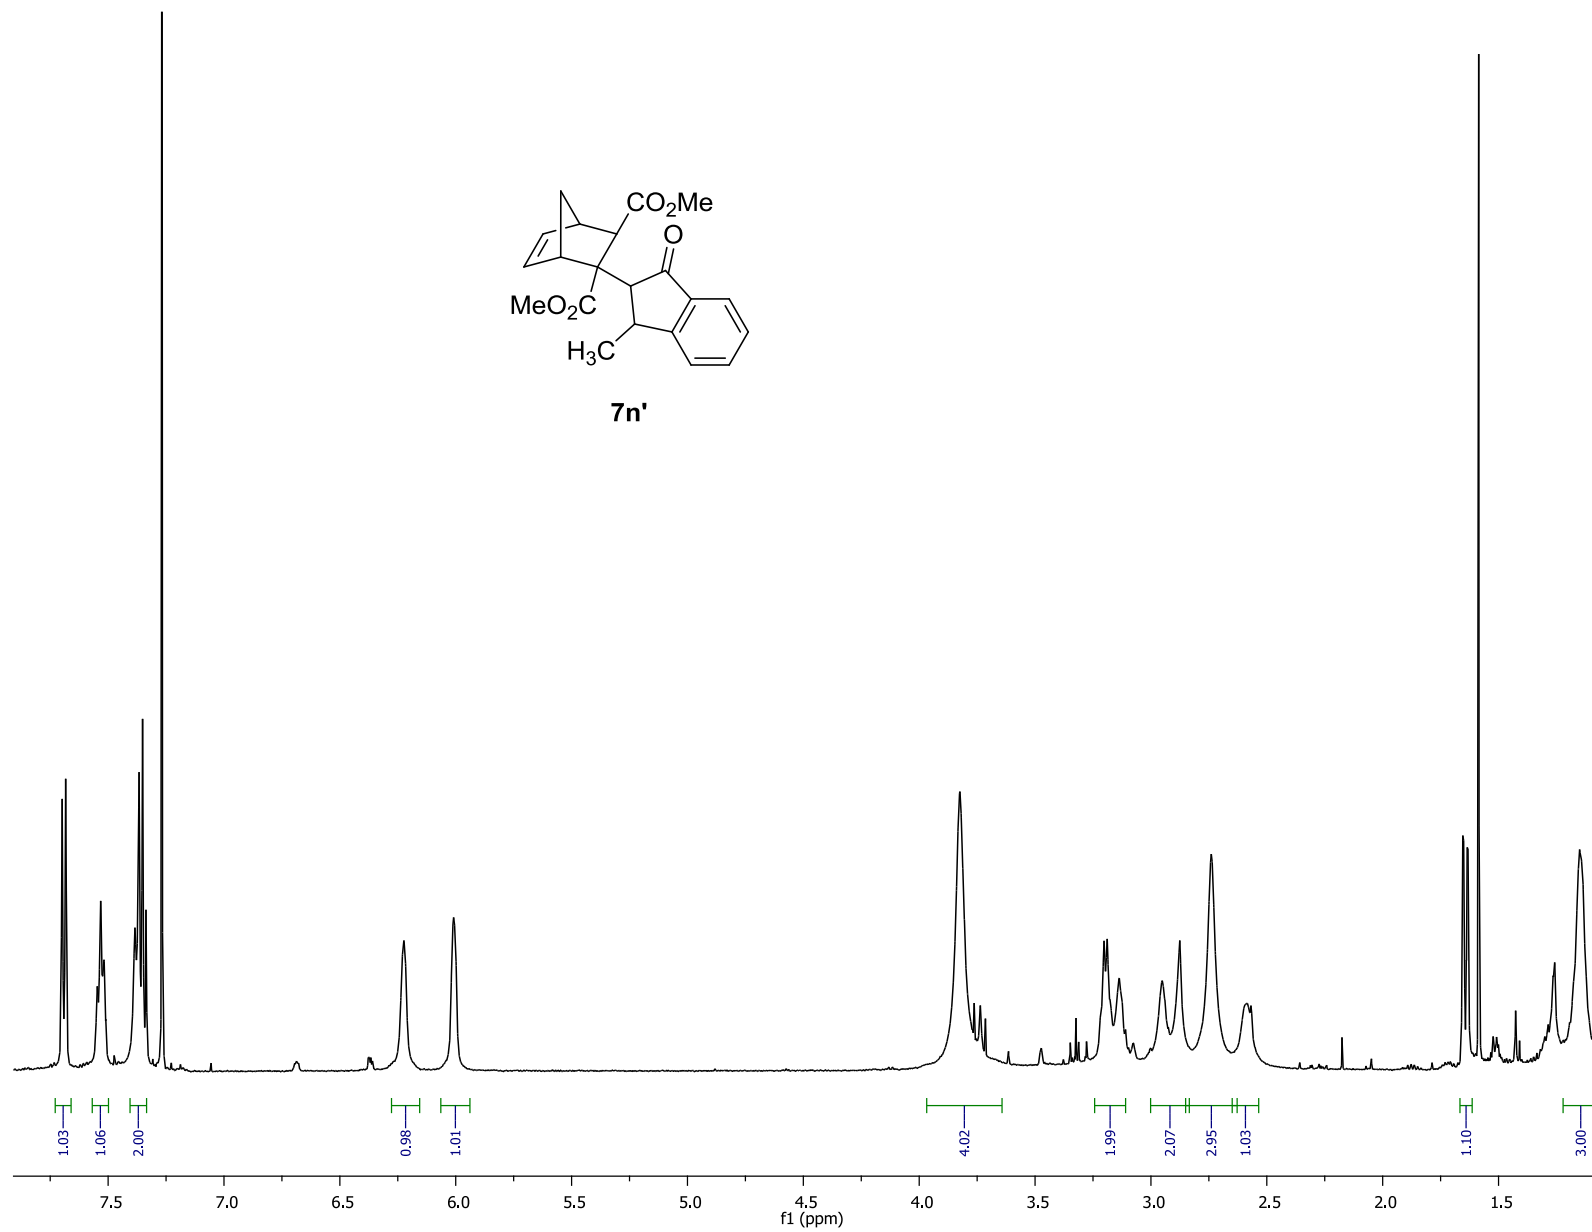

$^{13}\text{C}$  NMR (500 MHz,  $\text{CDCl}_3$ ):

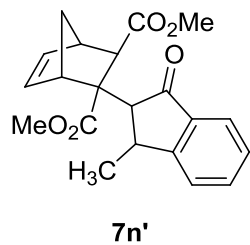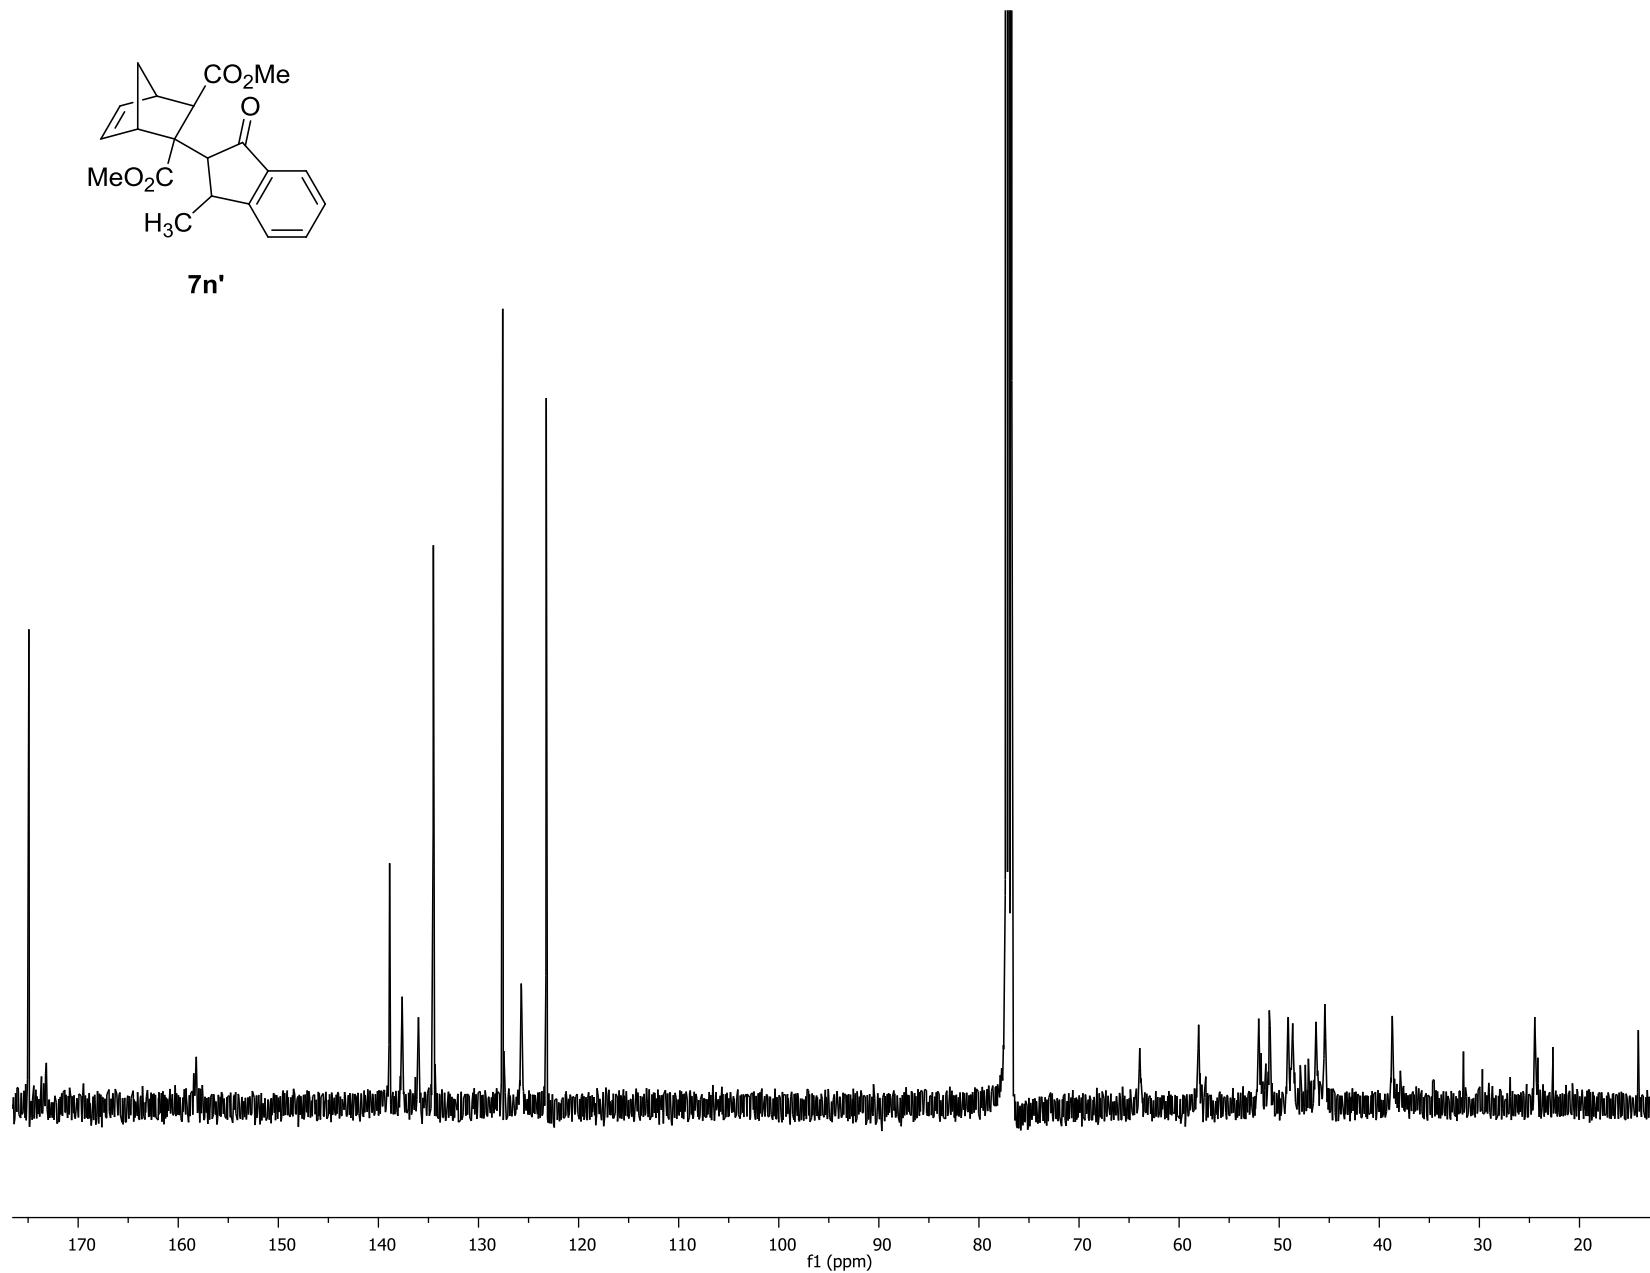

$^1\text{H}$  NMR (500 MHz,  $\text{CDCl}_3$ ):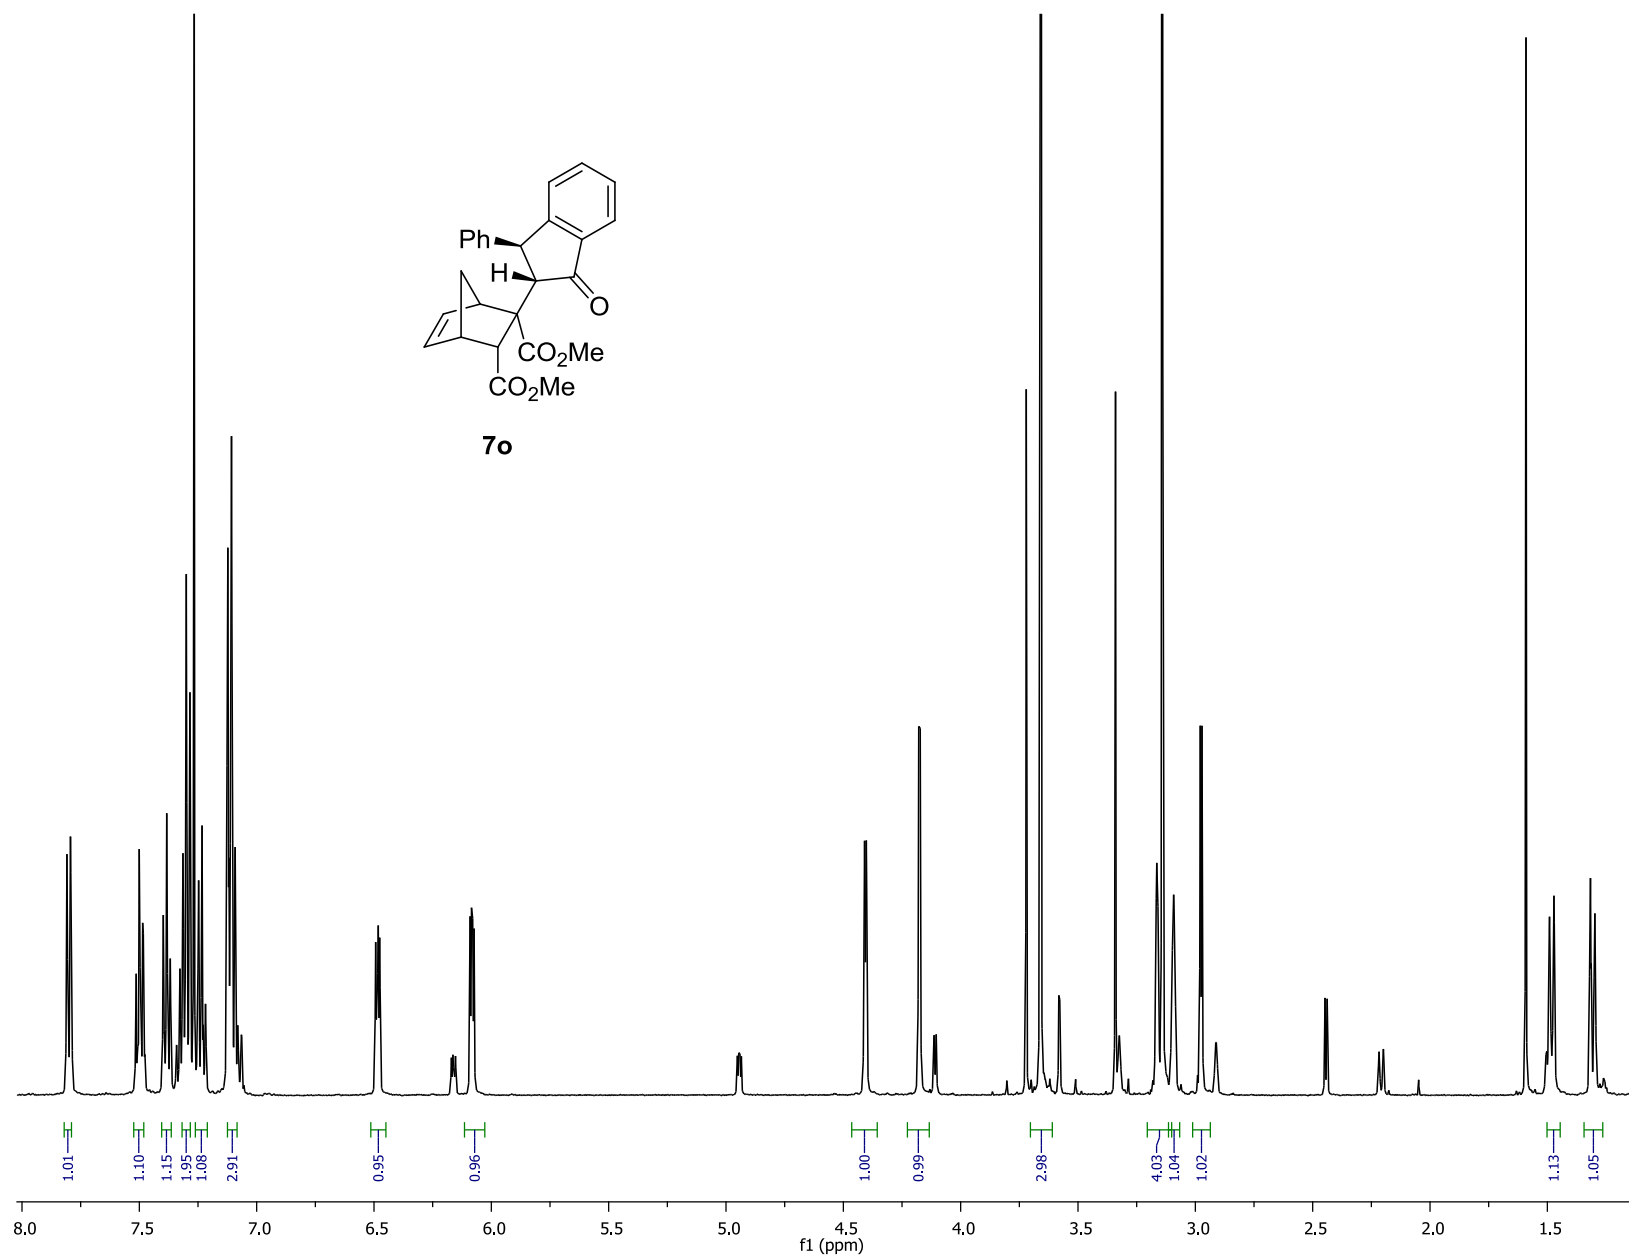

$^1\text{H}$  NMR (500 MHz,  $\text{C}_6\text{D}_6$ ):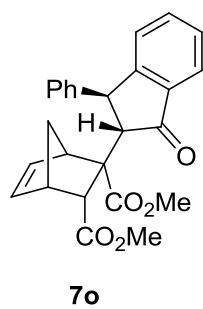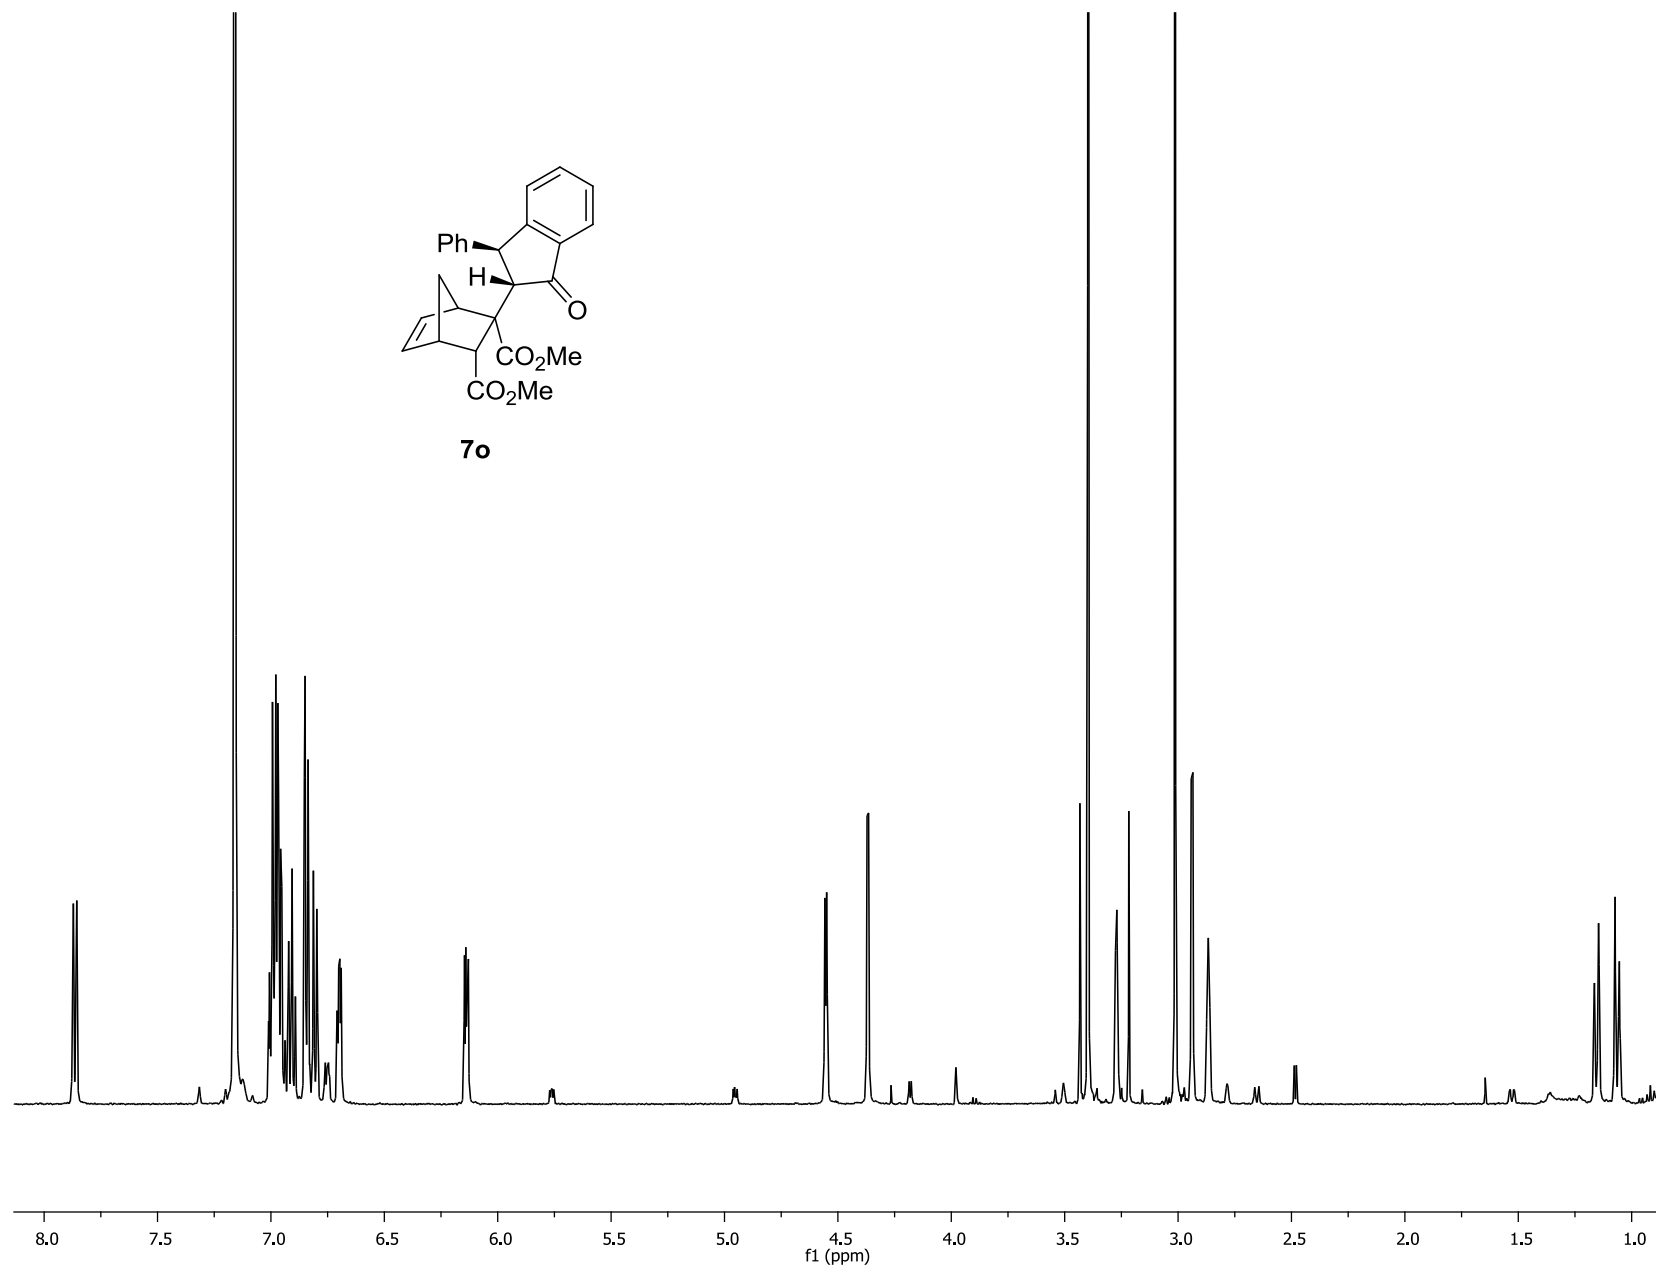

$^{13}\text{C}$  NMR (500 MHz,  $\text{CDCl}_3$ ):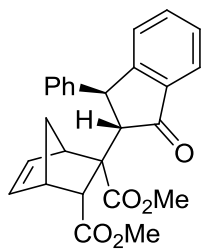**7o**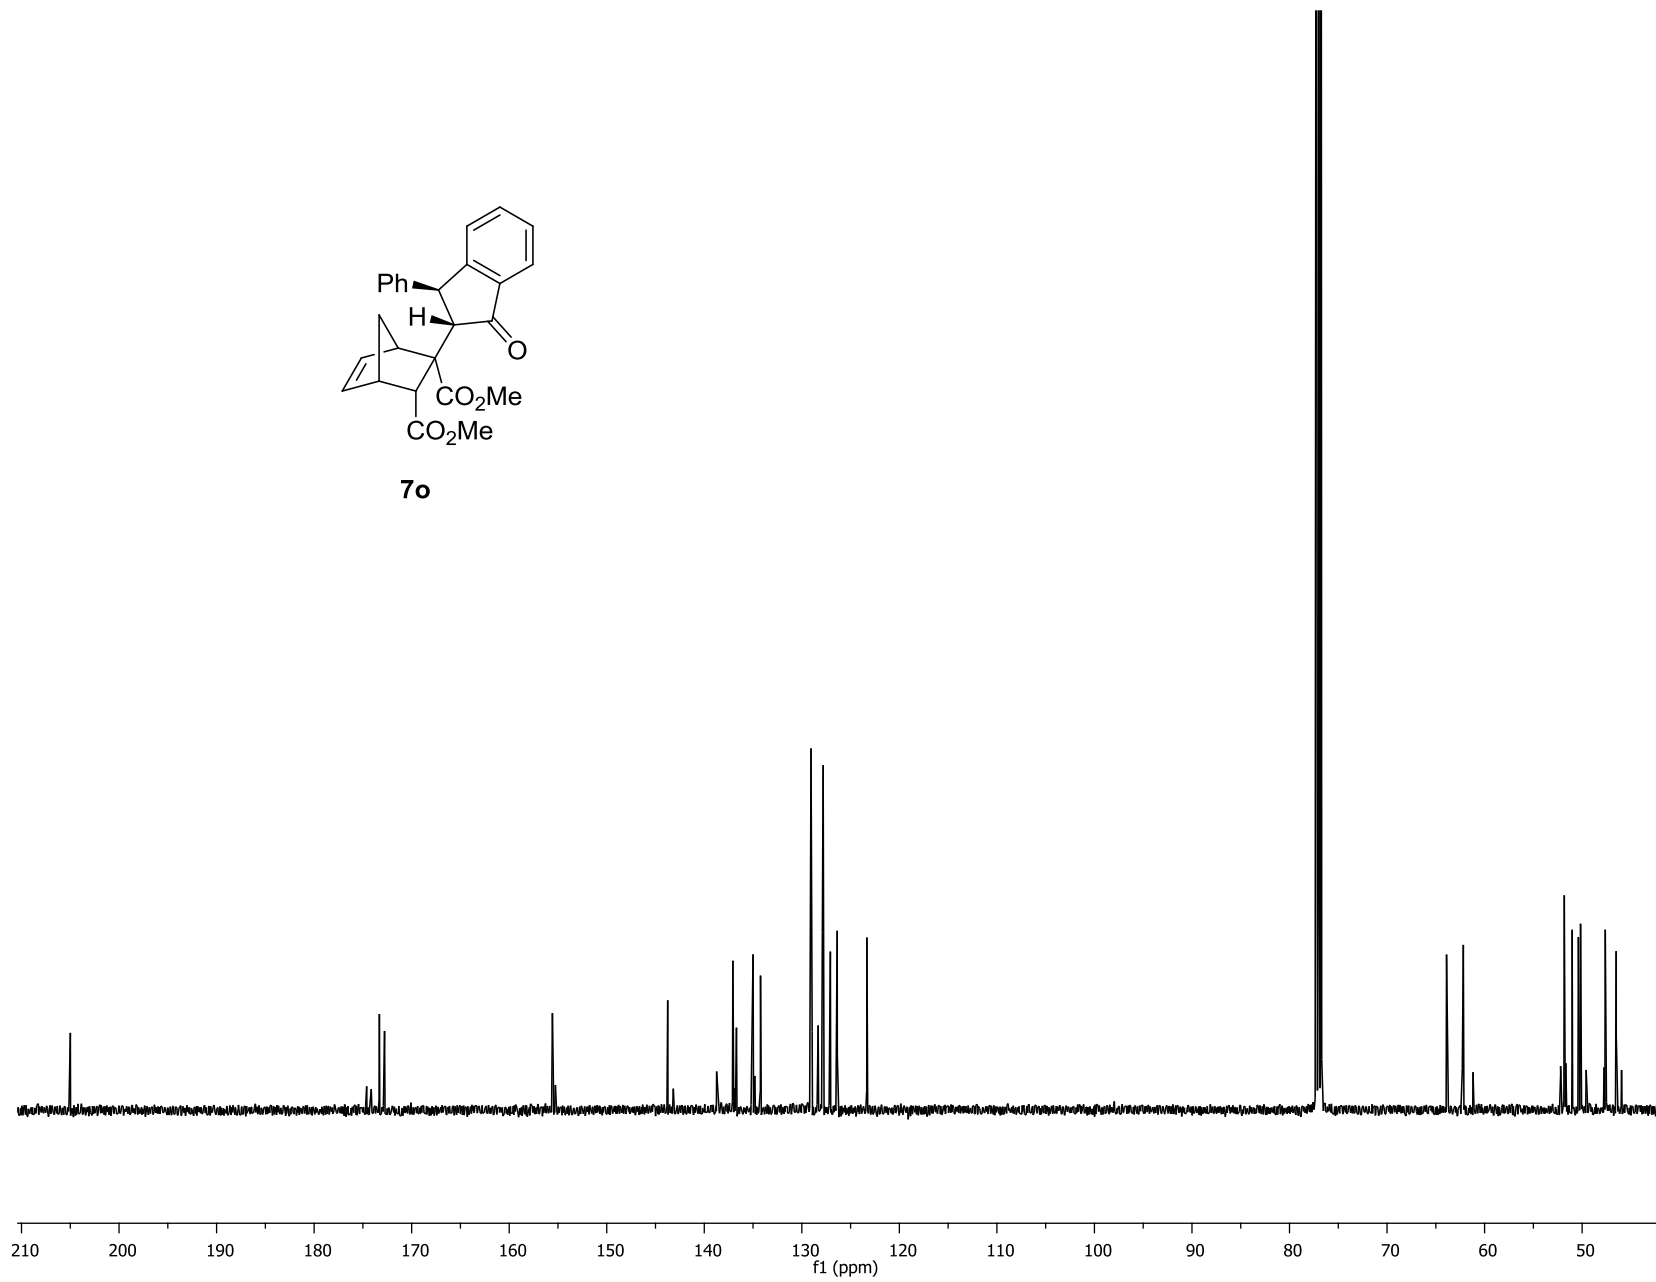



$^1\text{H}$  NMR (500 MHz,  $\text{CDCl}_3$ ):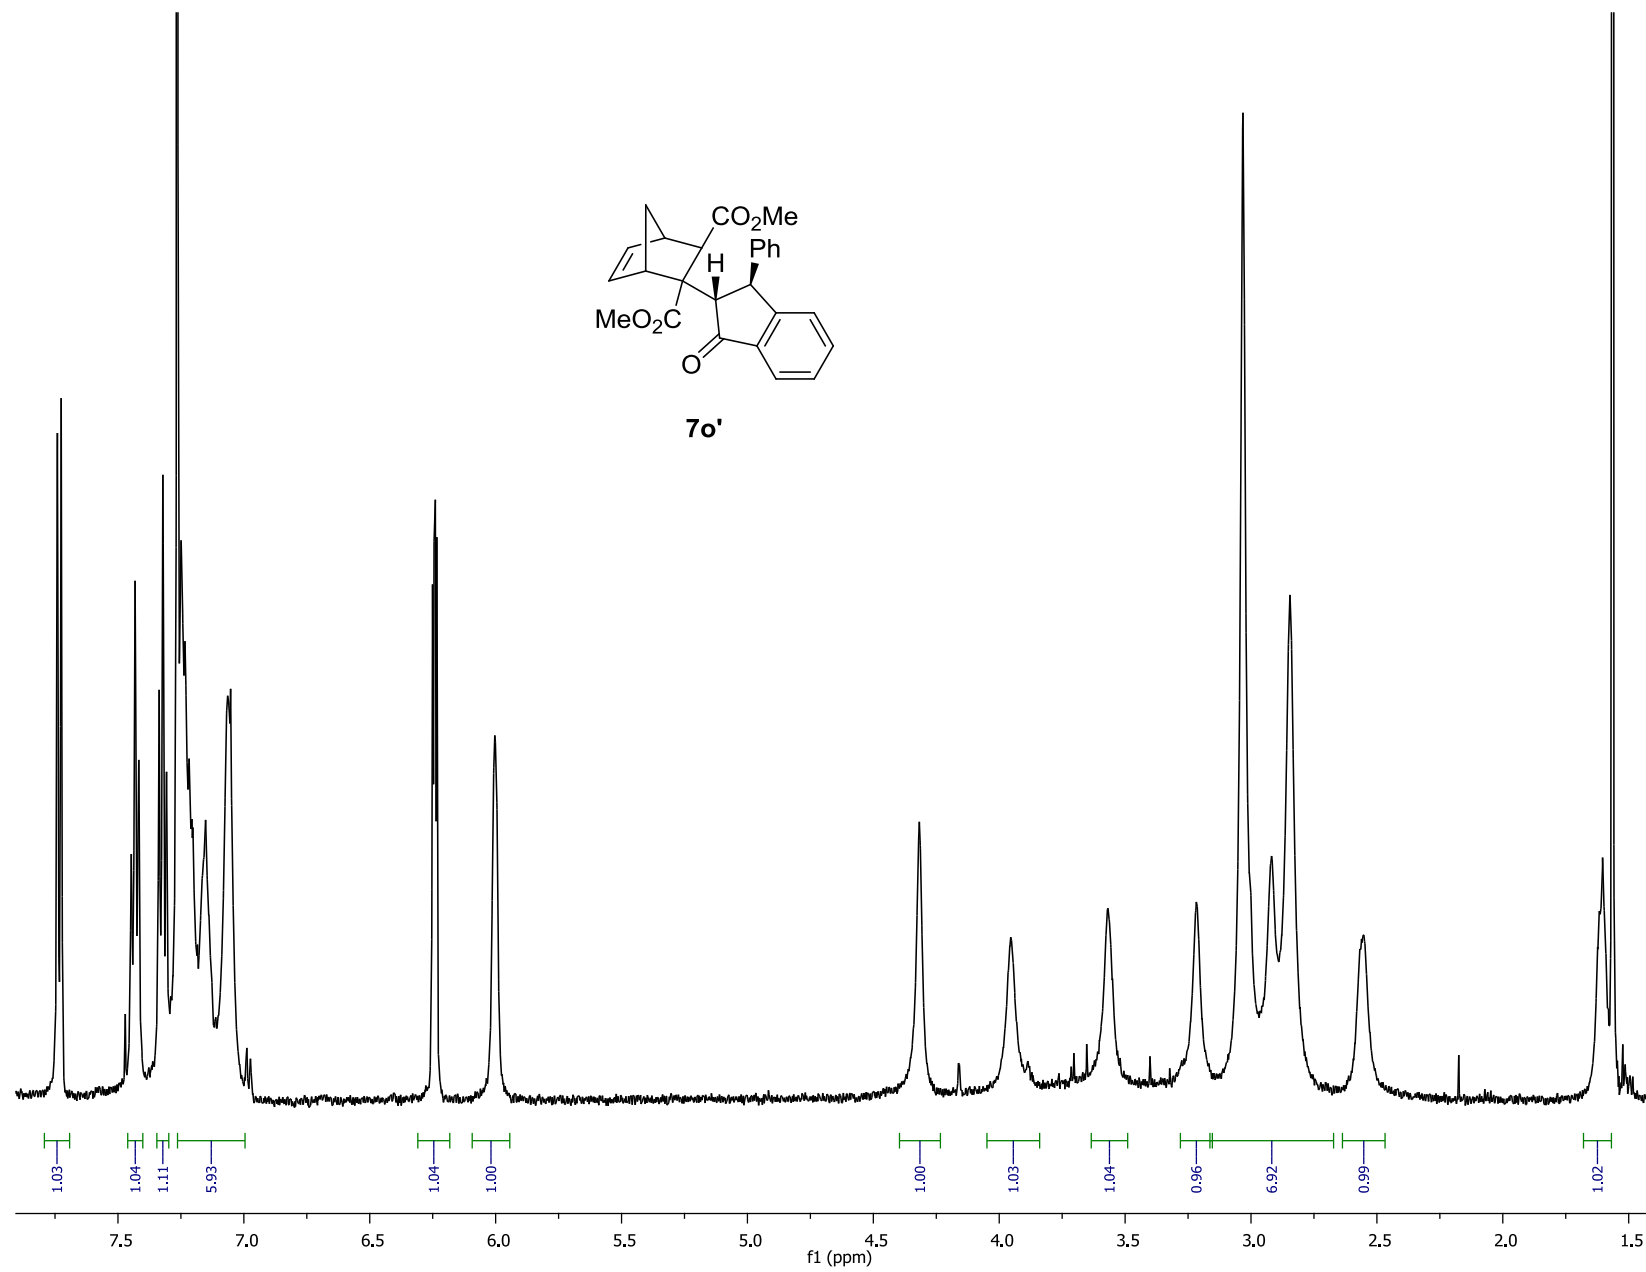

$^1\text{H}$  NMR (500 MHz,  $\text{CDCl}_3$ ):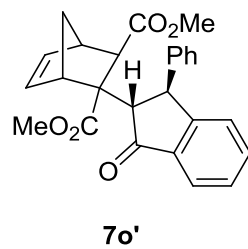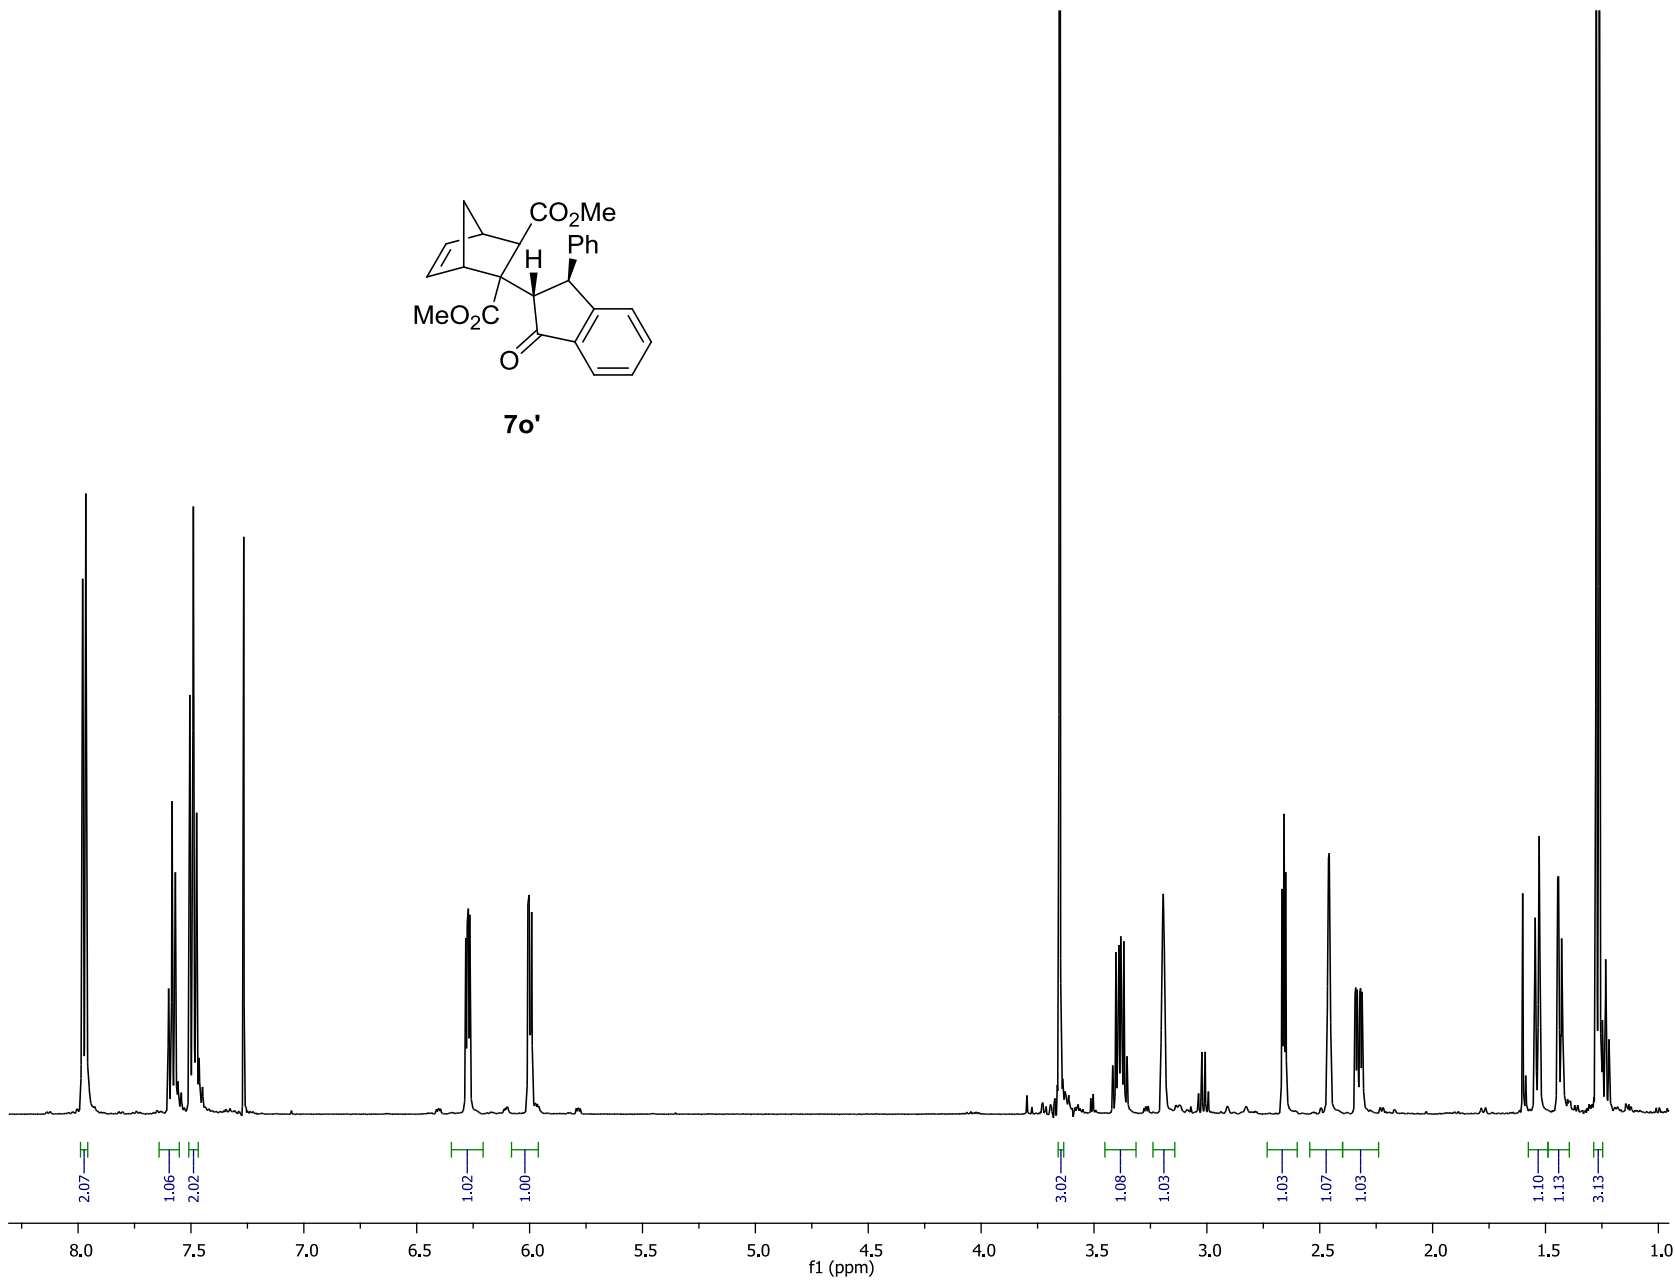

$^1\text{H}$  NMR (500 MHz,  $\text{CDCl}_3$ ):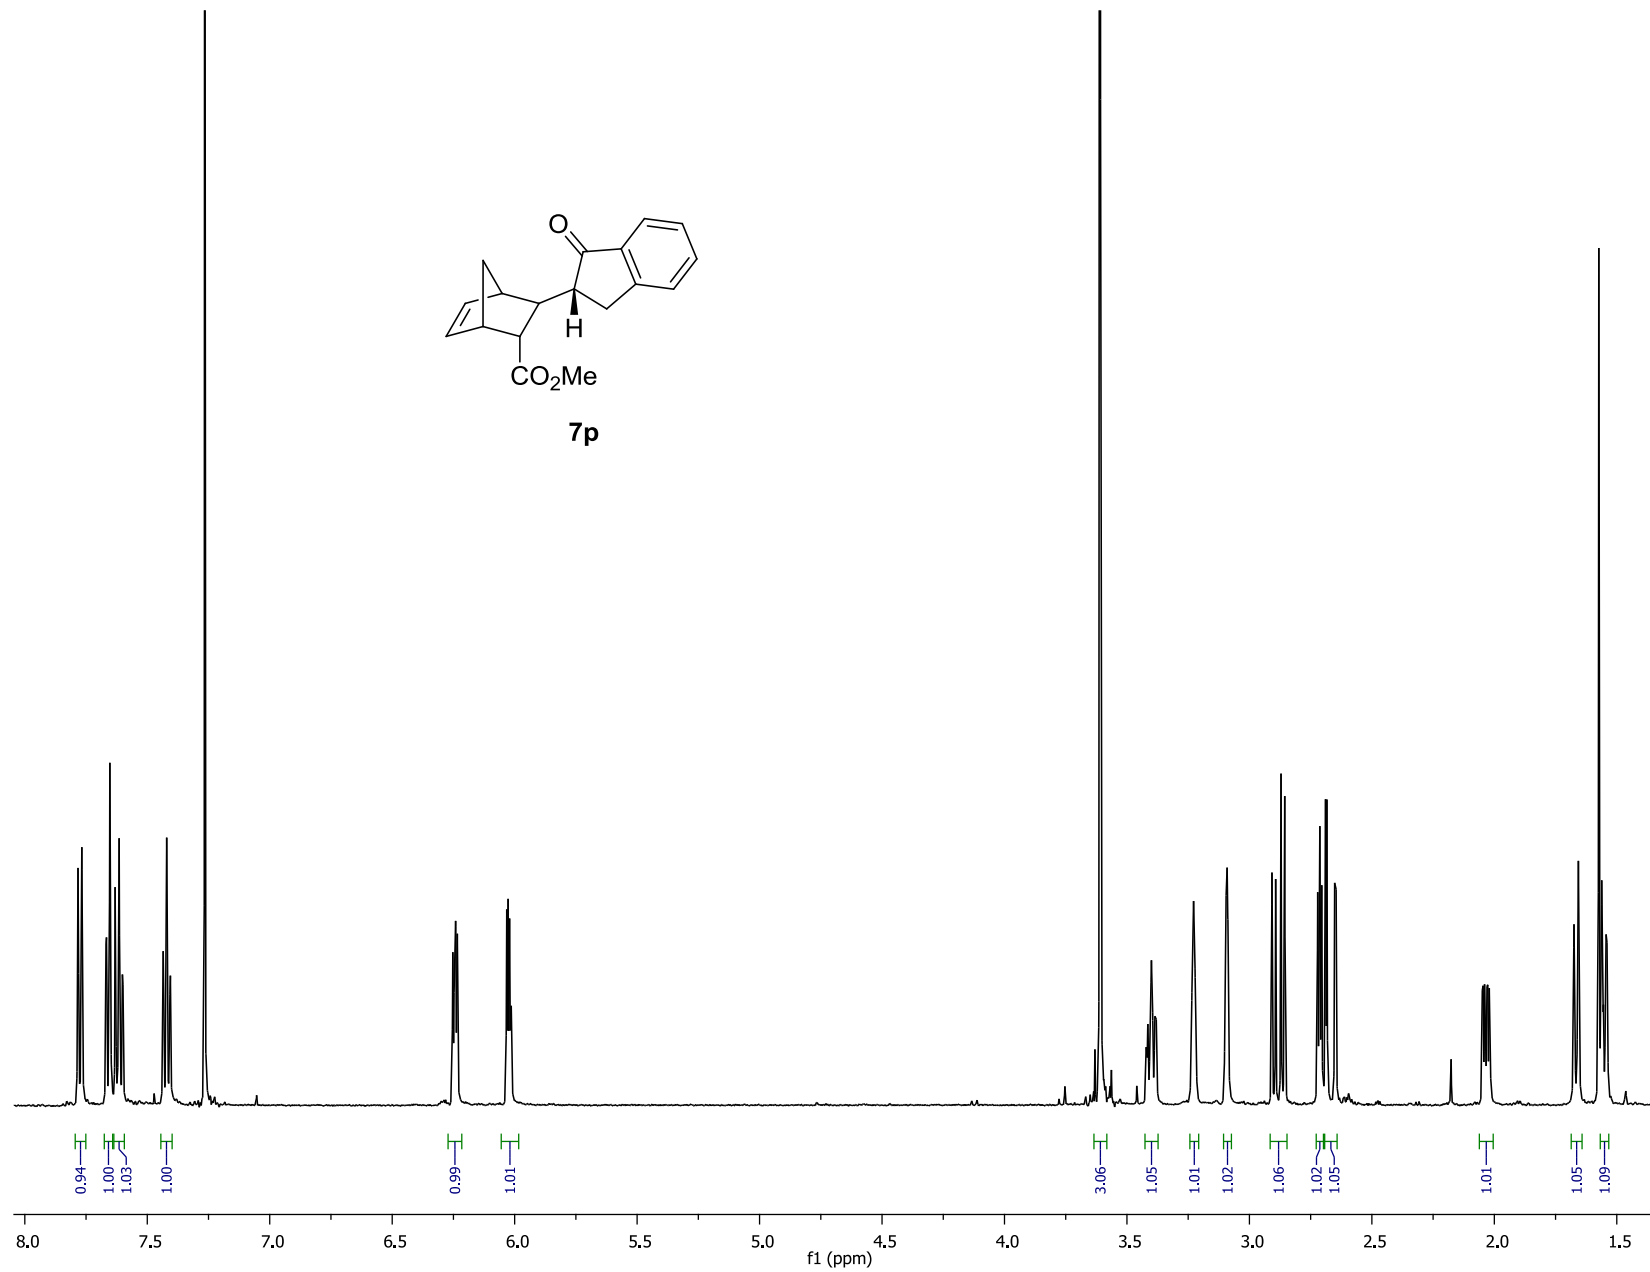

$^{13}\text{C}$  NMR (500 MHz,  $\text{CDCl}_3$ ):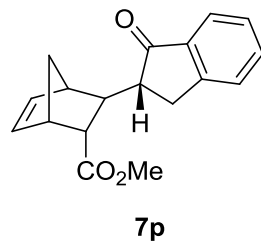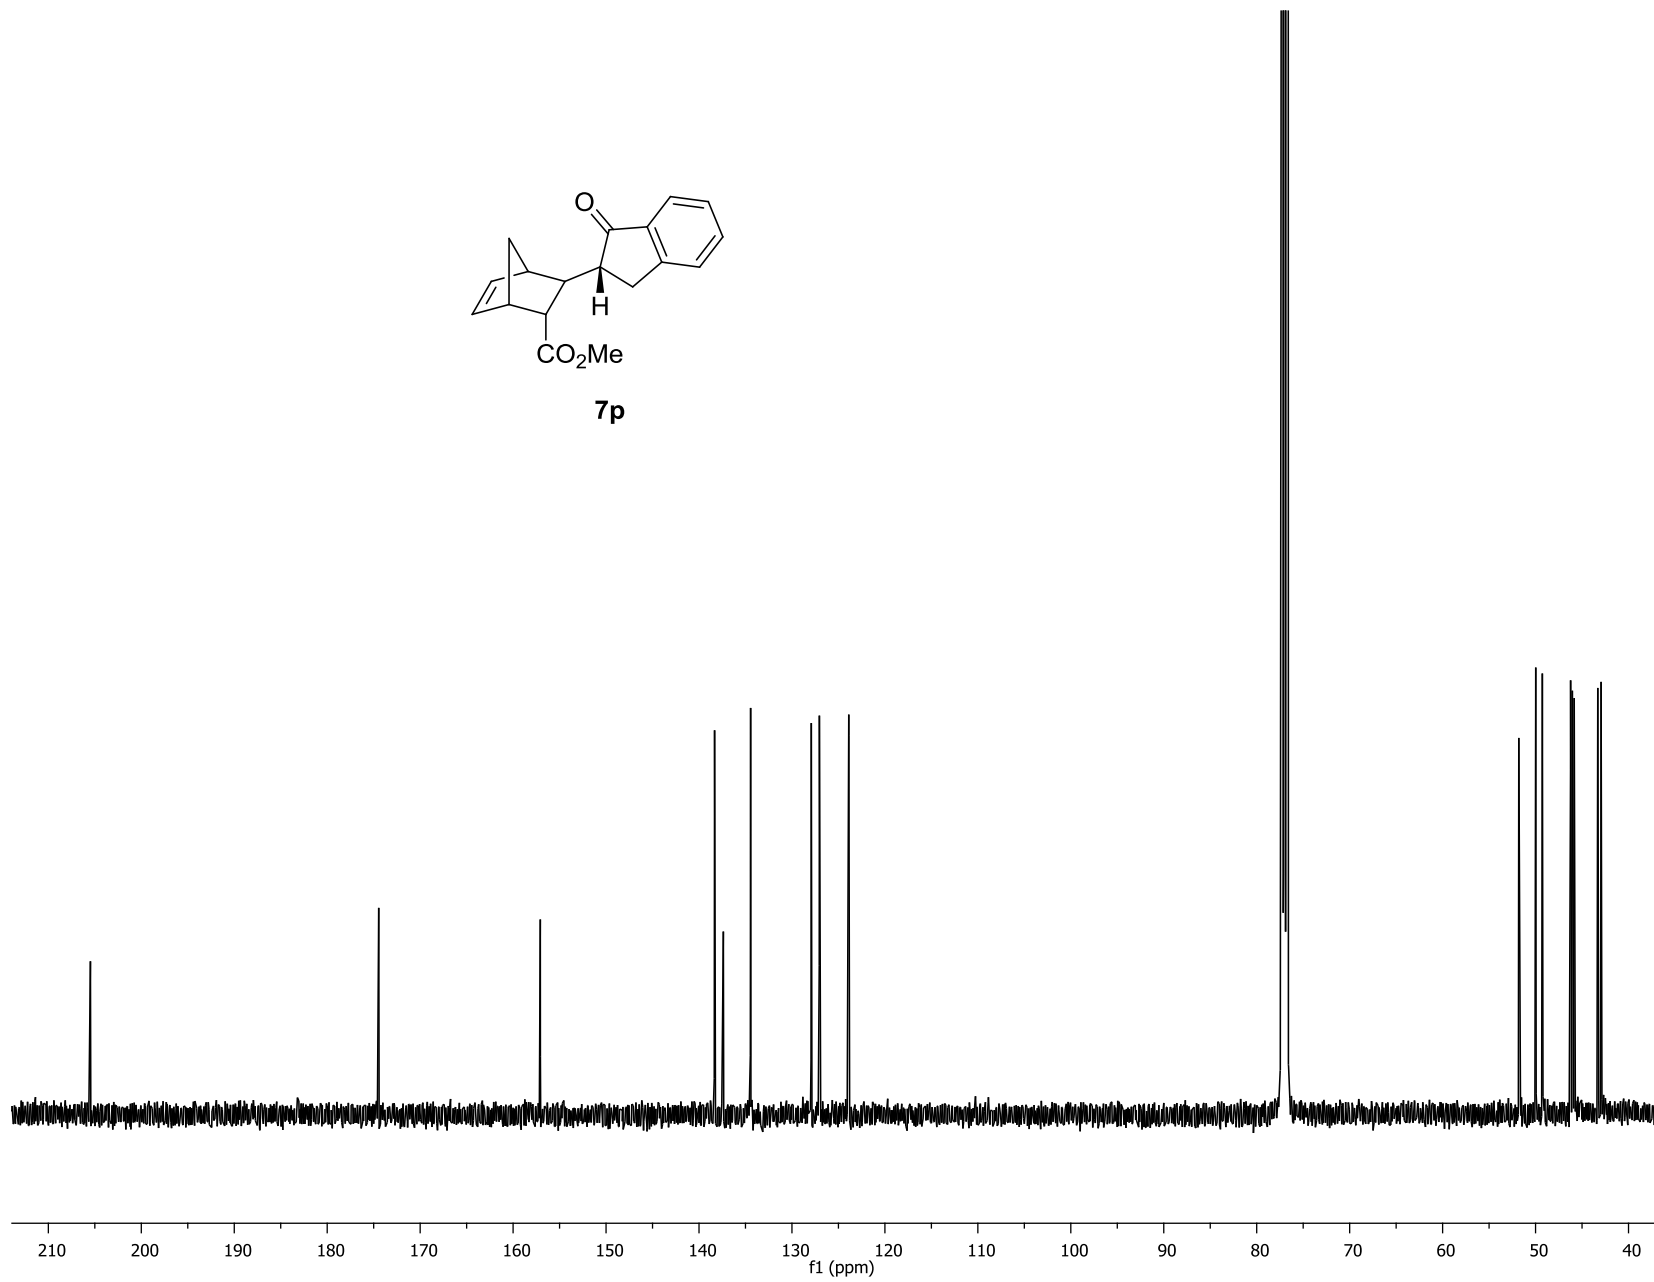

COSY (500 MHz, CDCl<sub>3</sub>):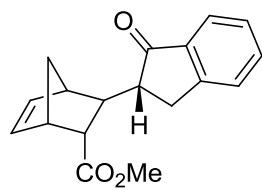

7p

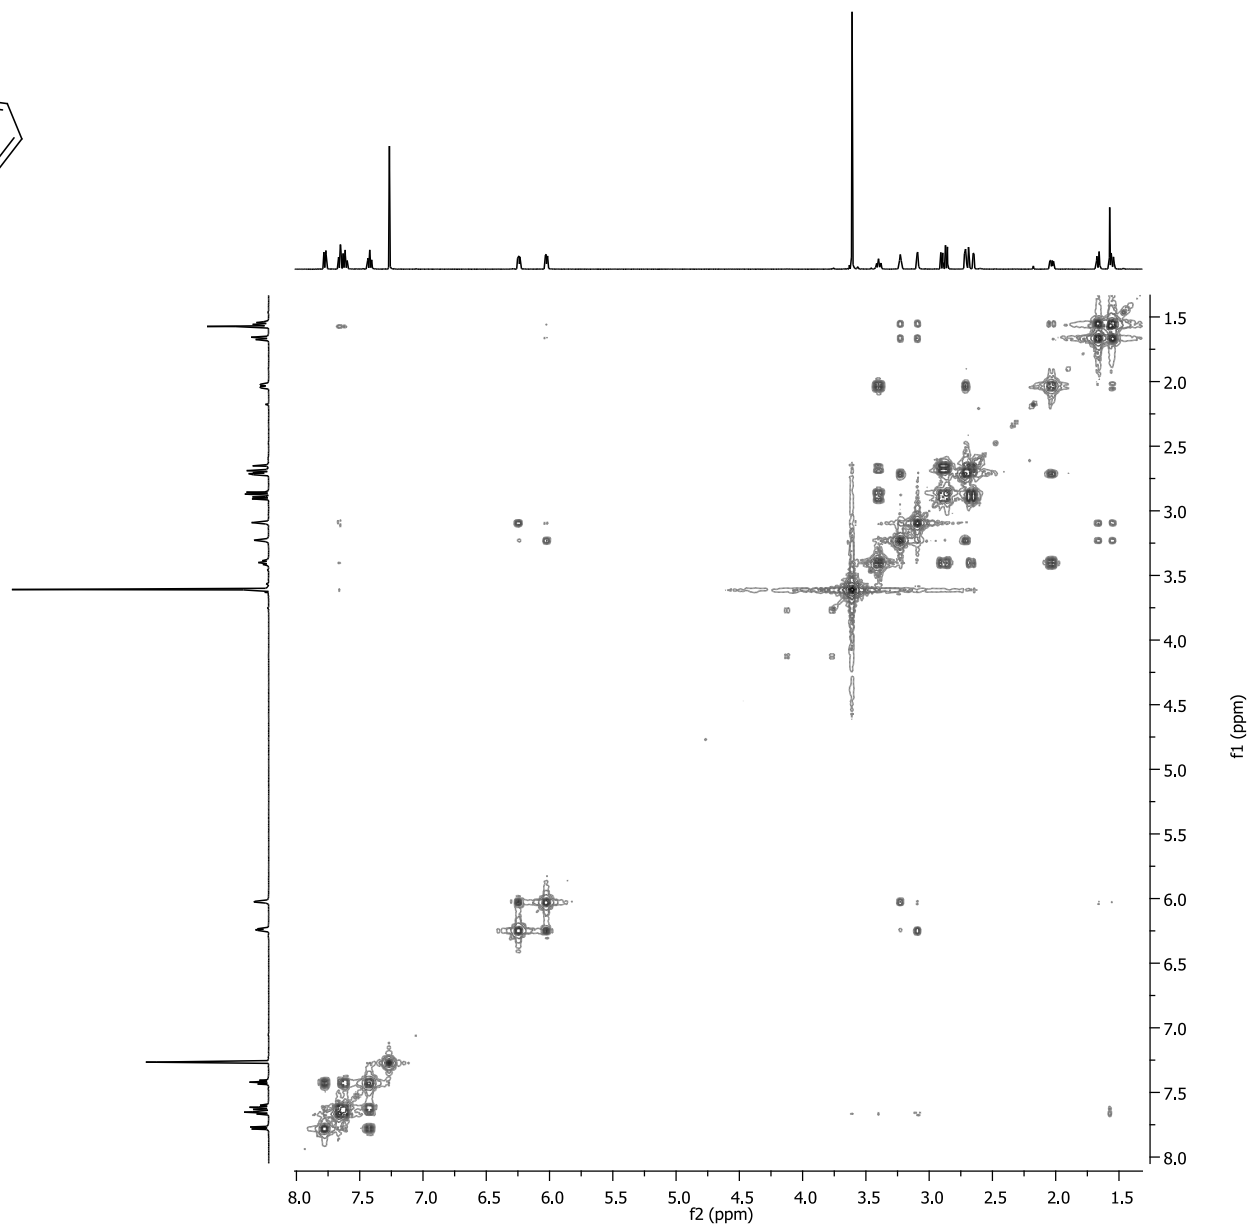

$^1\text{H}$  NMR (500 MHz,  $\text{CDCl}_3$ ):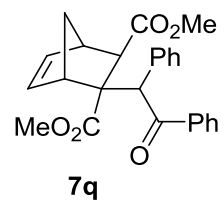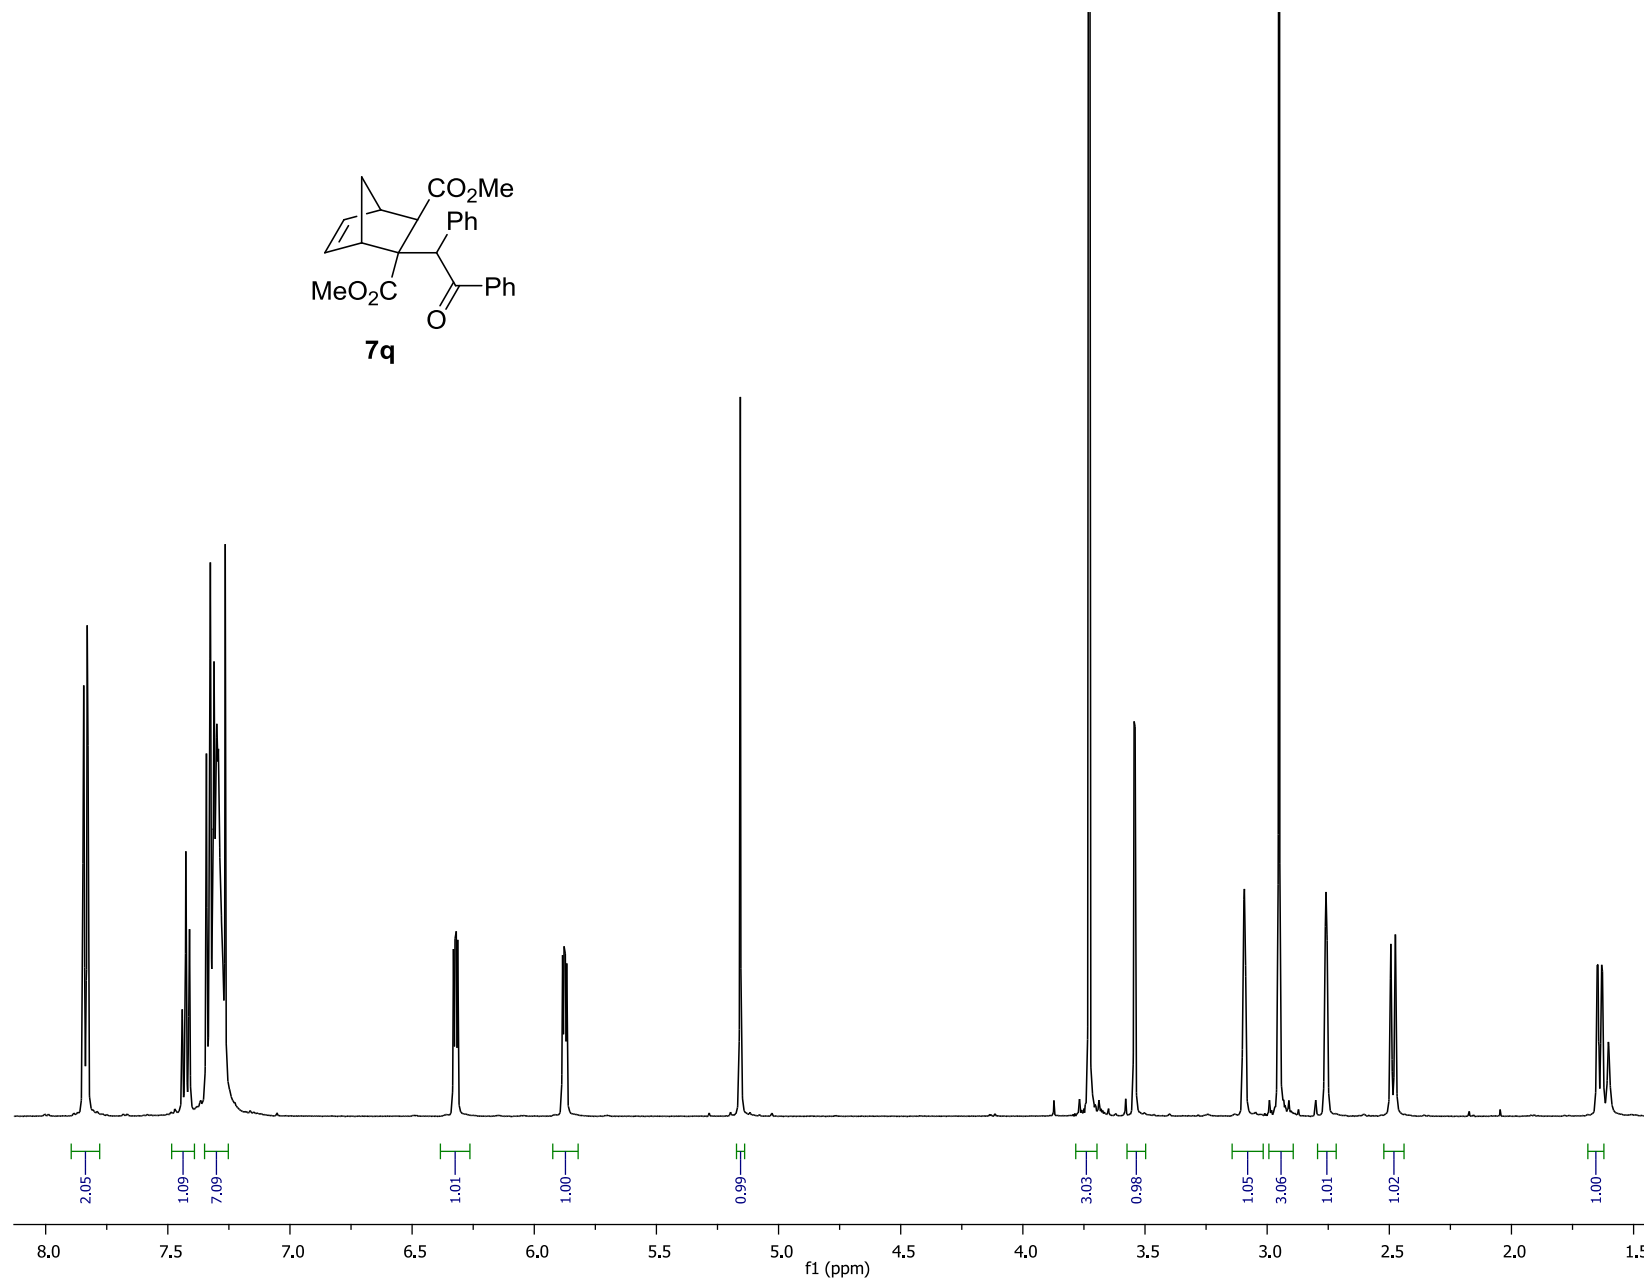

$^{13}\text{C}$  NMR (500 MHz,  $\text{CDCl}_3$ ):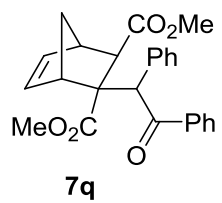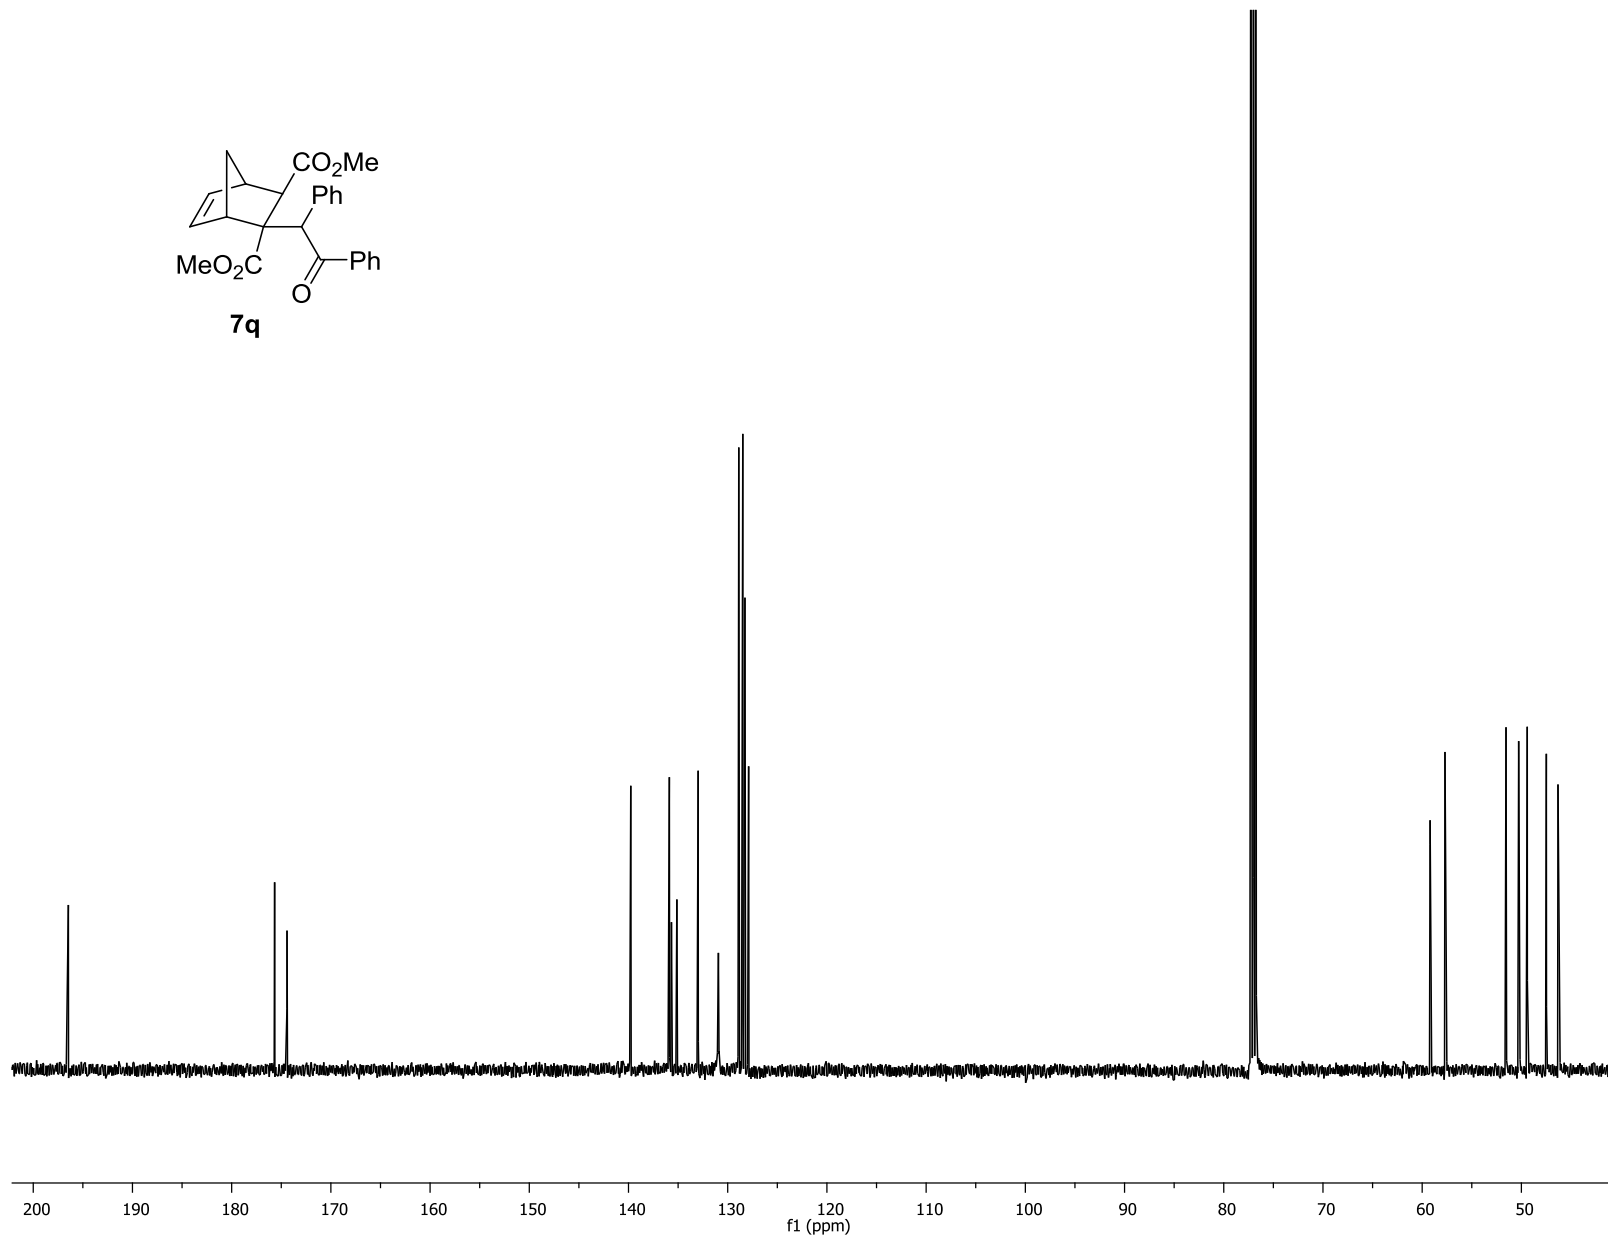

$^1\text{H}$  NMR (500 MHz,  $\text{CDCl}_3$ ):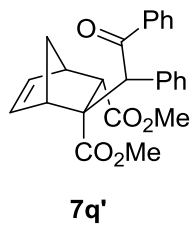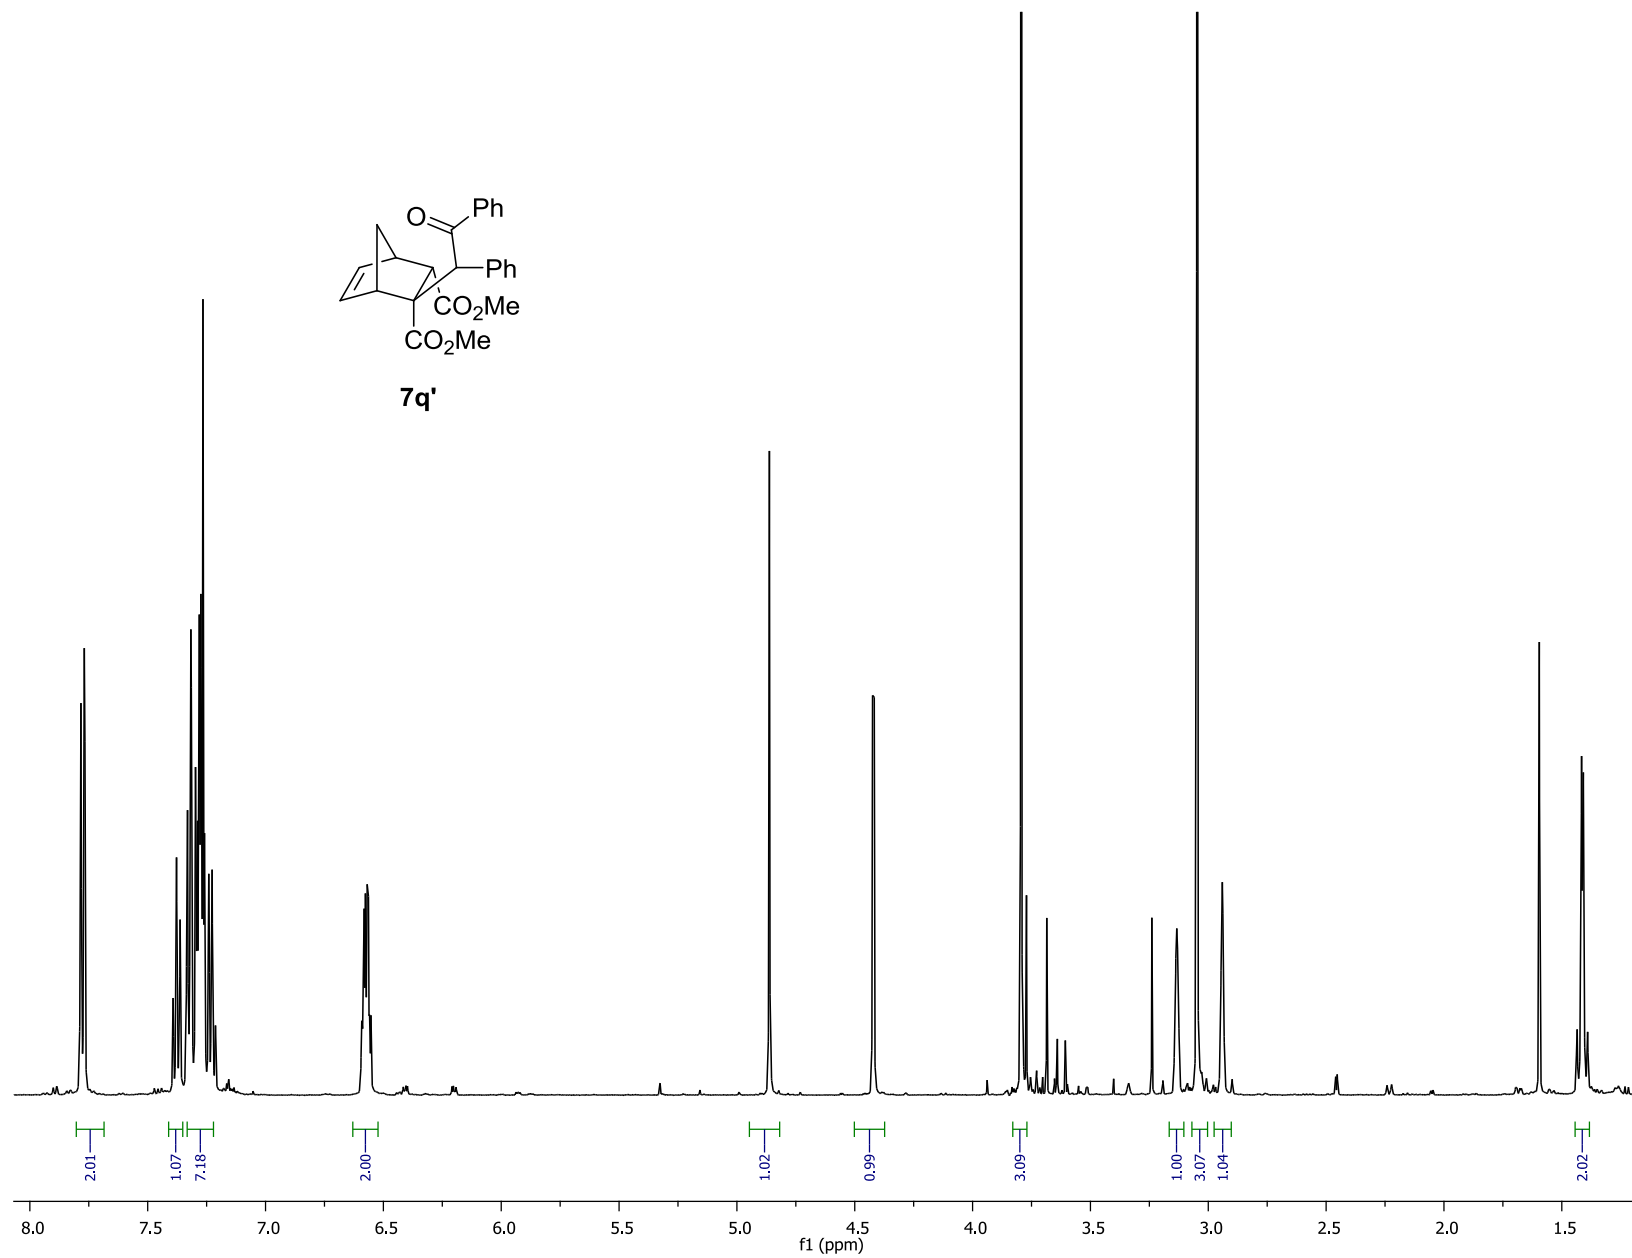



$^{13}\text{C}$  NMR (500 MHz,  $\text{CDCl}_3$ ):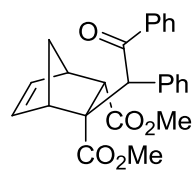**7q'**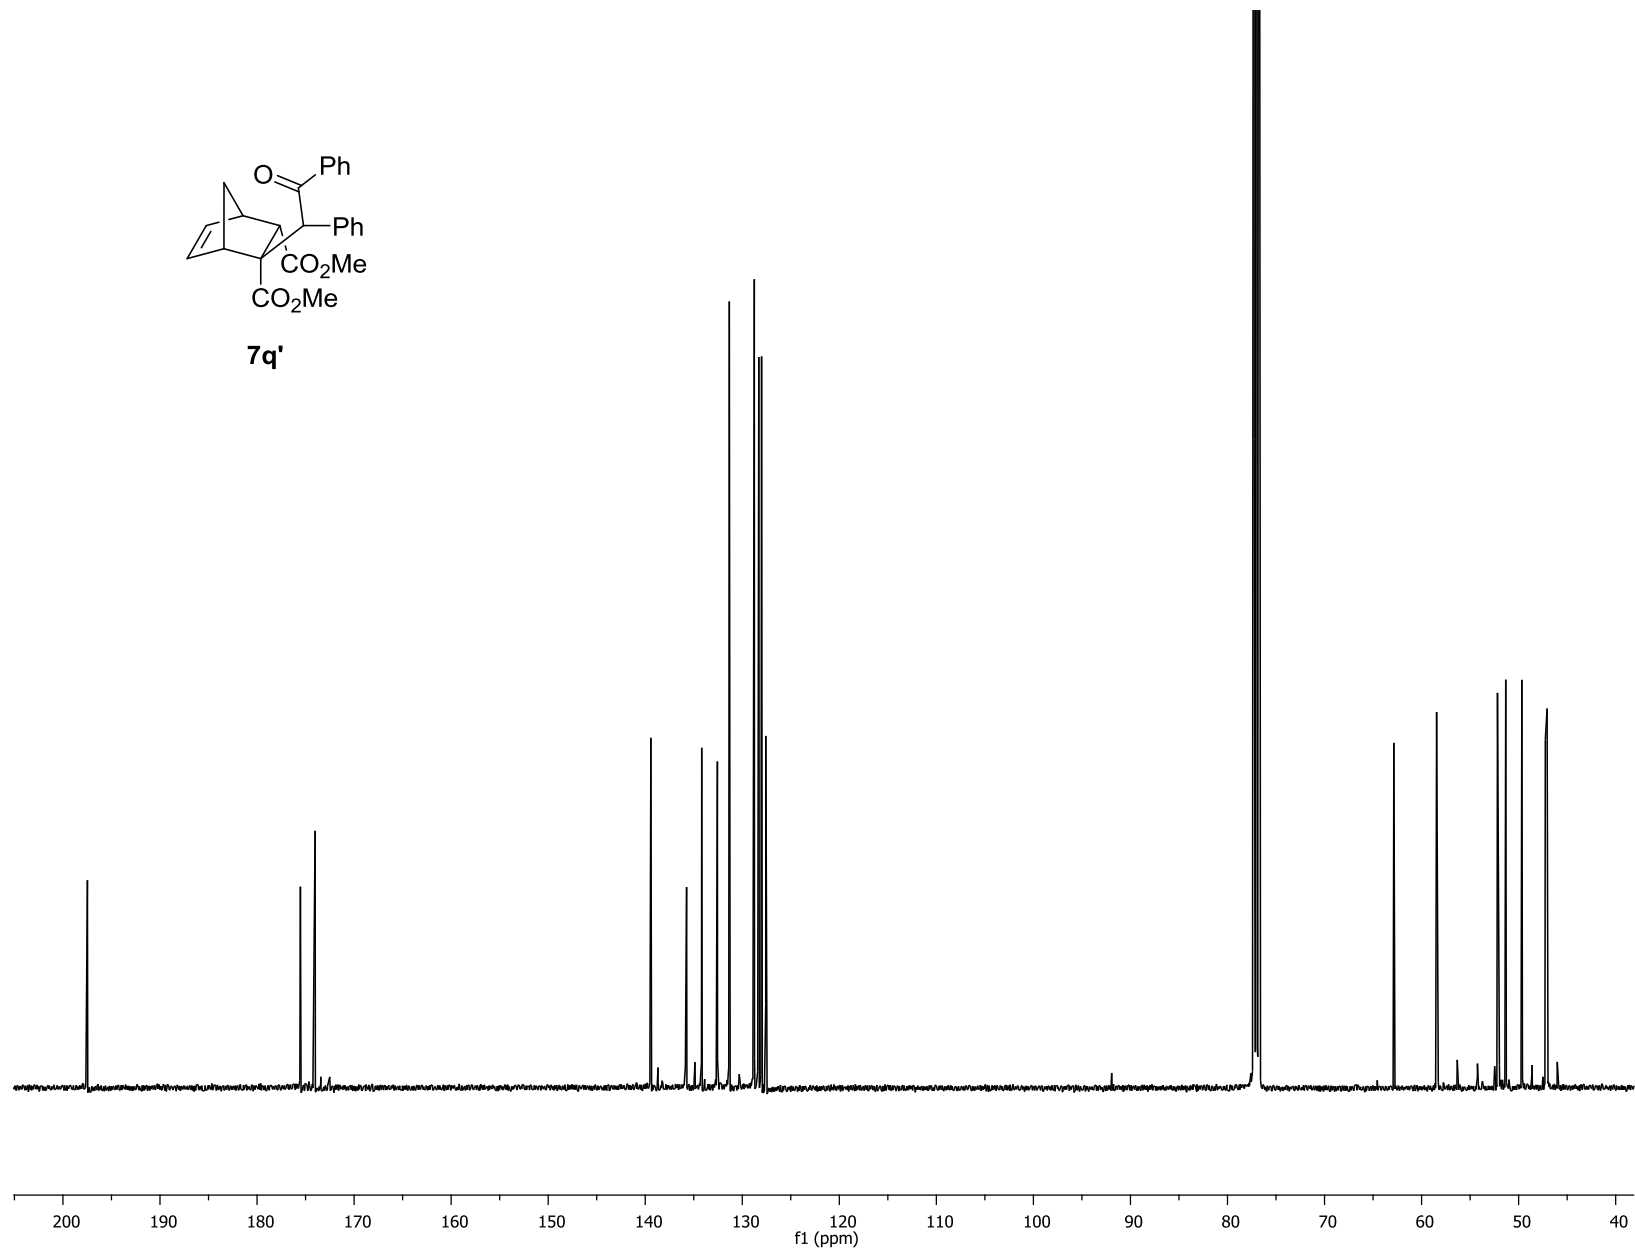

$^1\text{H}$  NMR (500 MHz,  $\text{CDCl}_3$ ):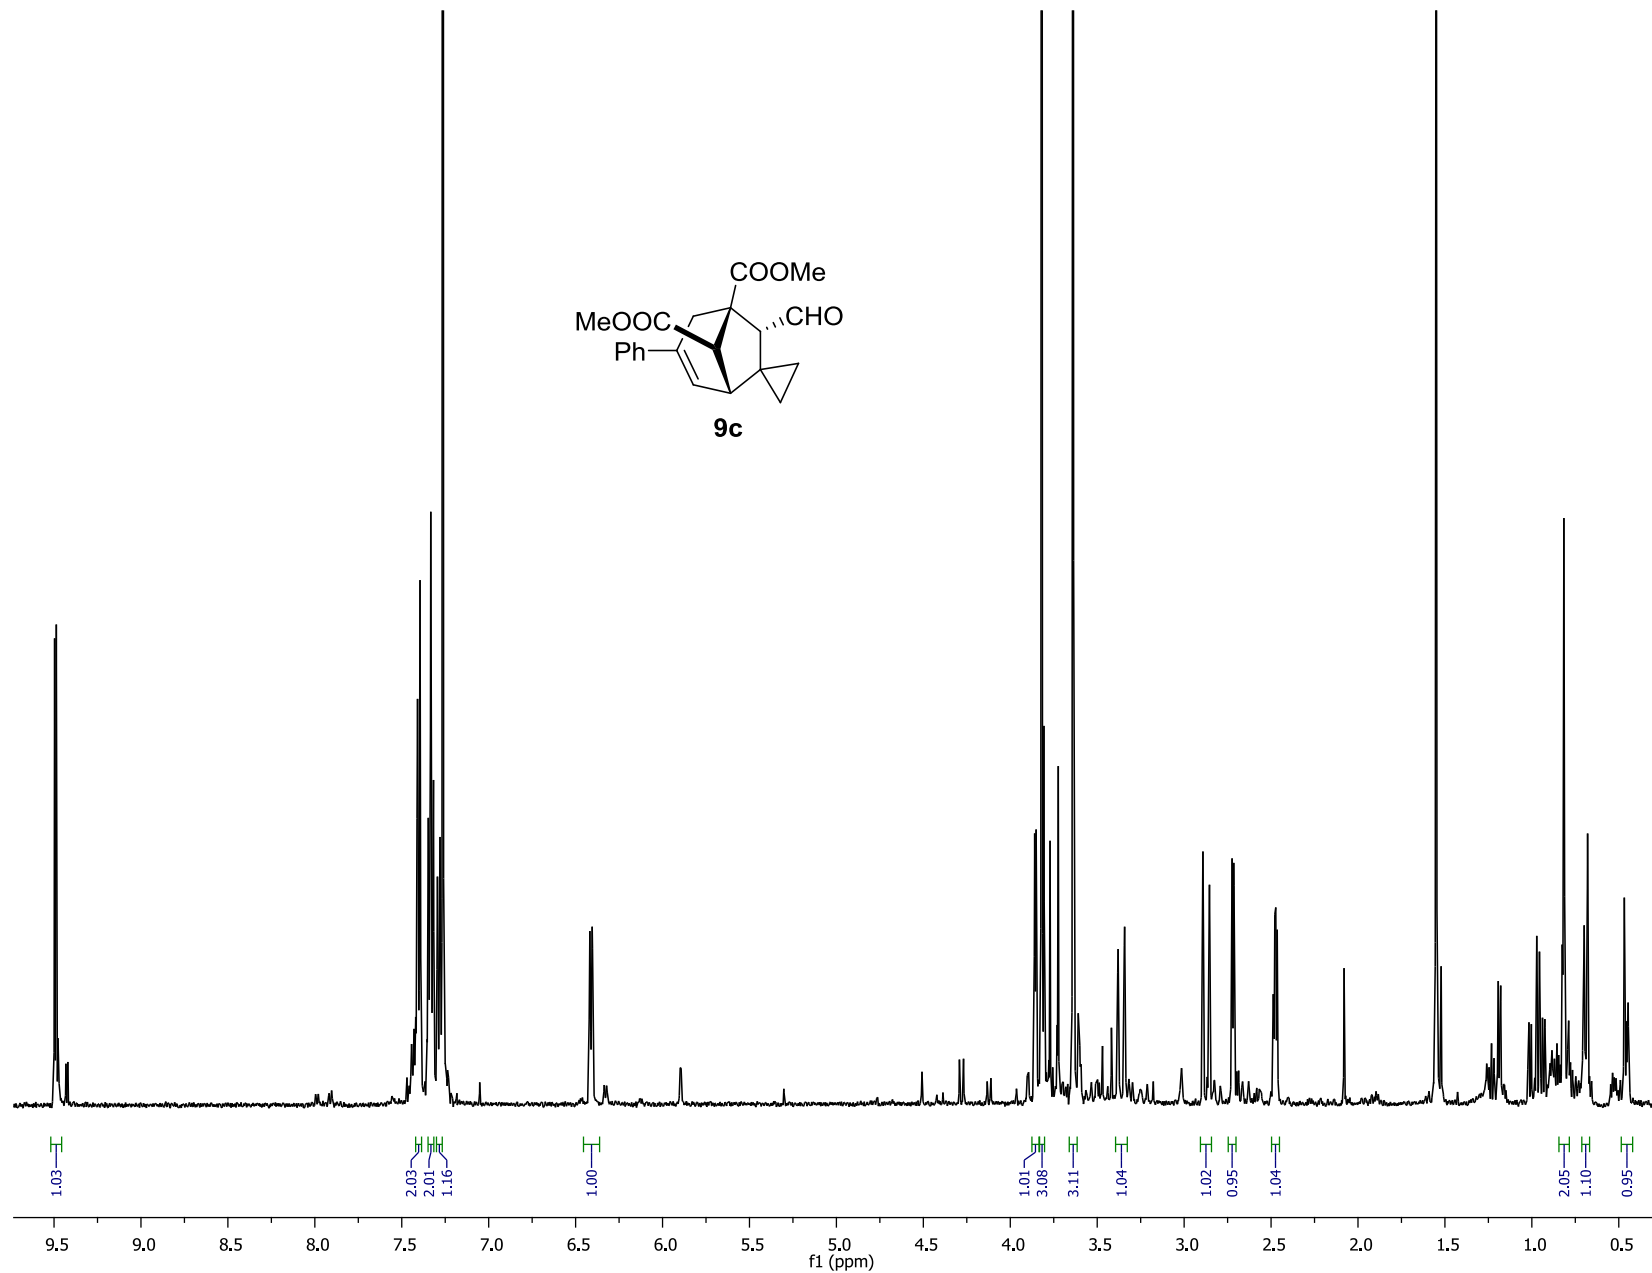

$^{13}\text{C}$  NMR (500 MHz,  $\text{CDCl}_3$ ):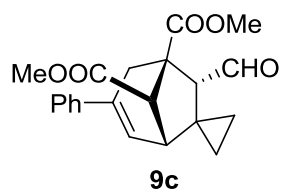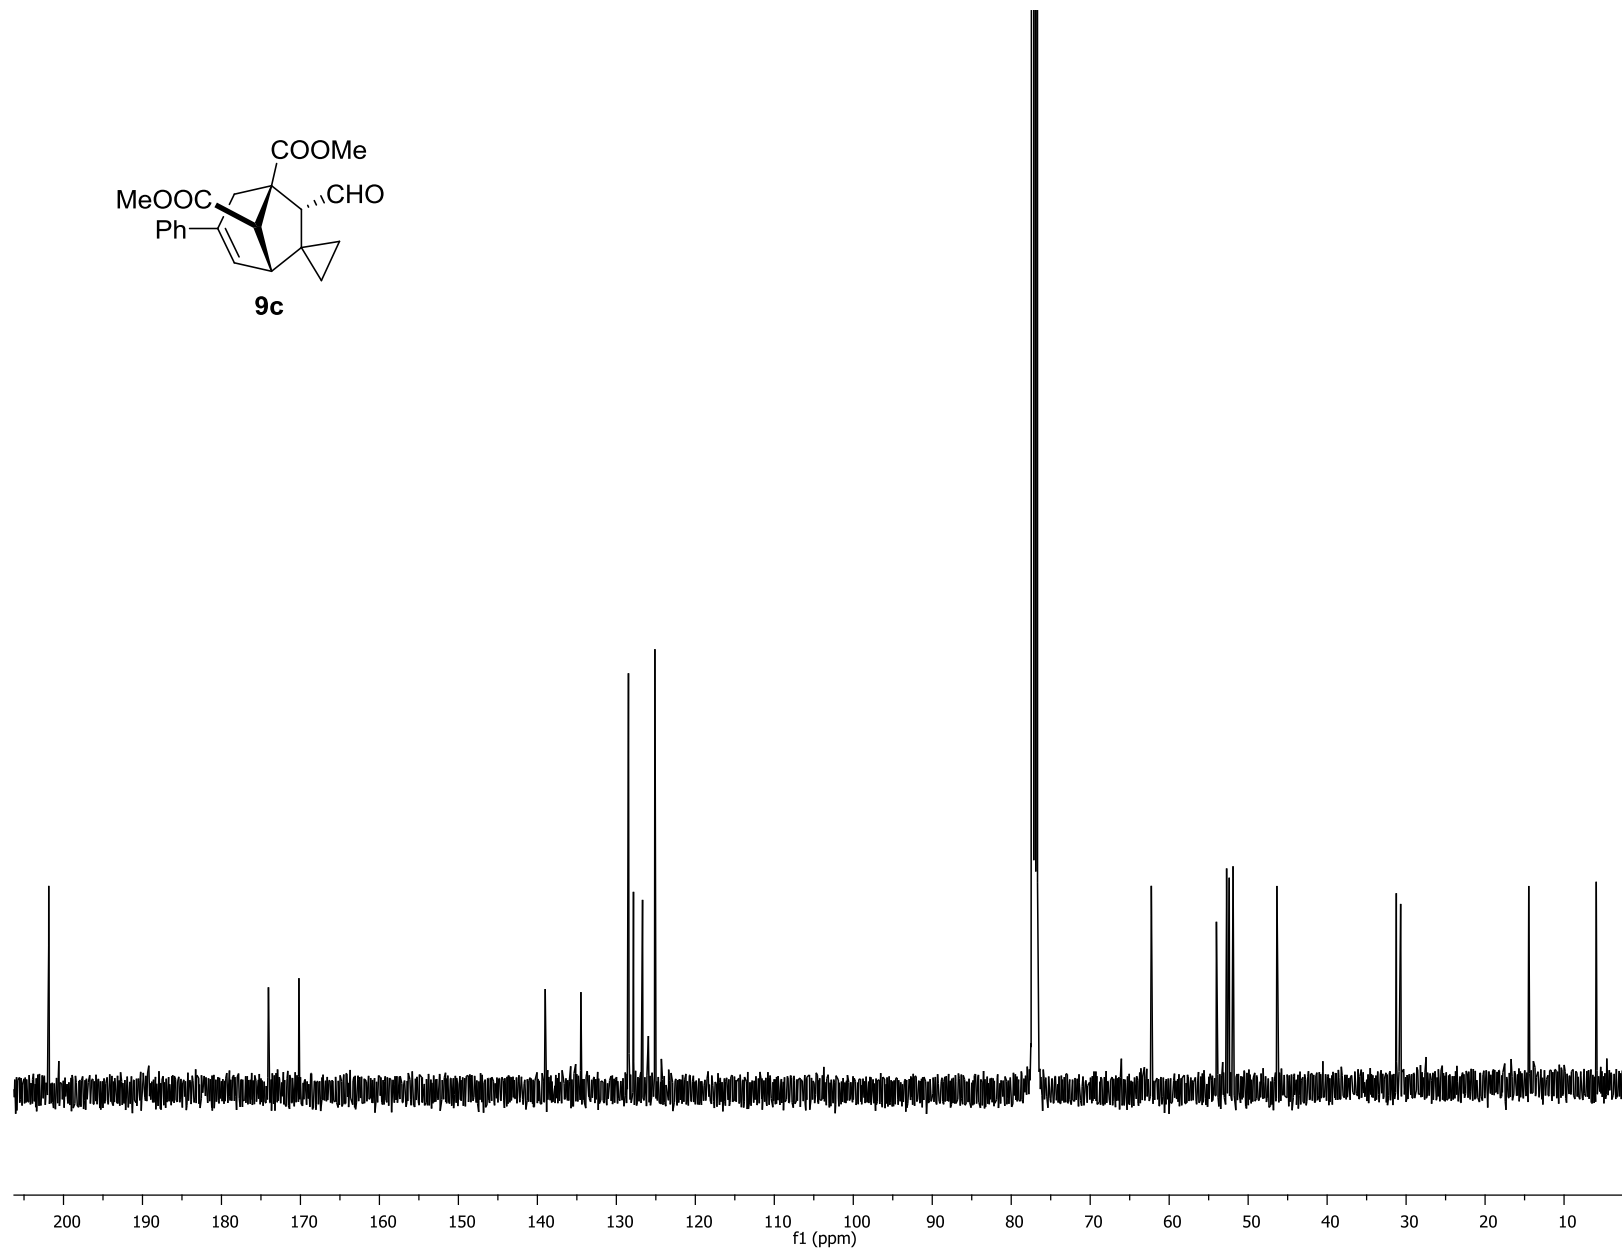

COSY (500 MHz, CDCl<sub>3</sub>):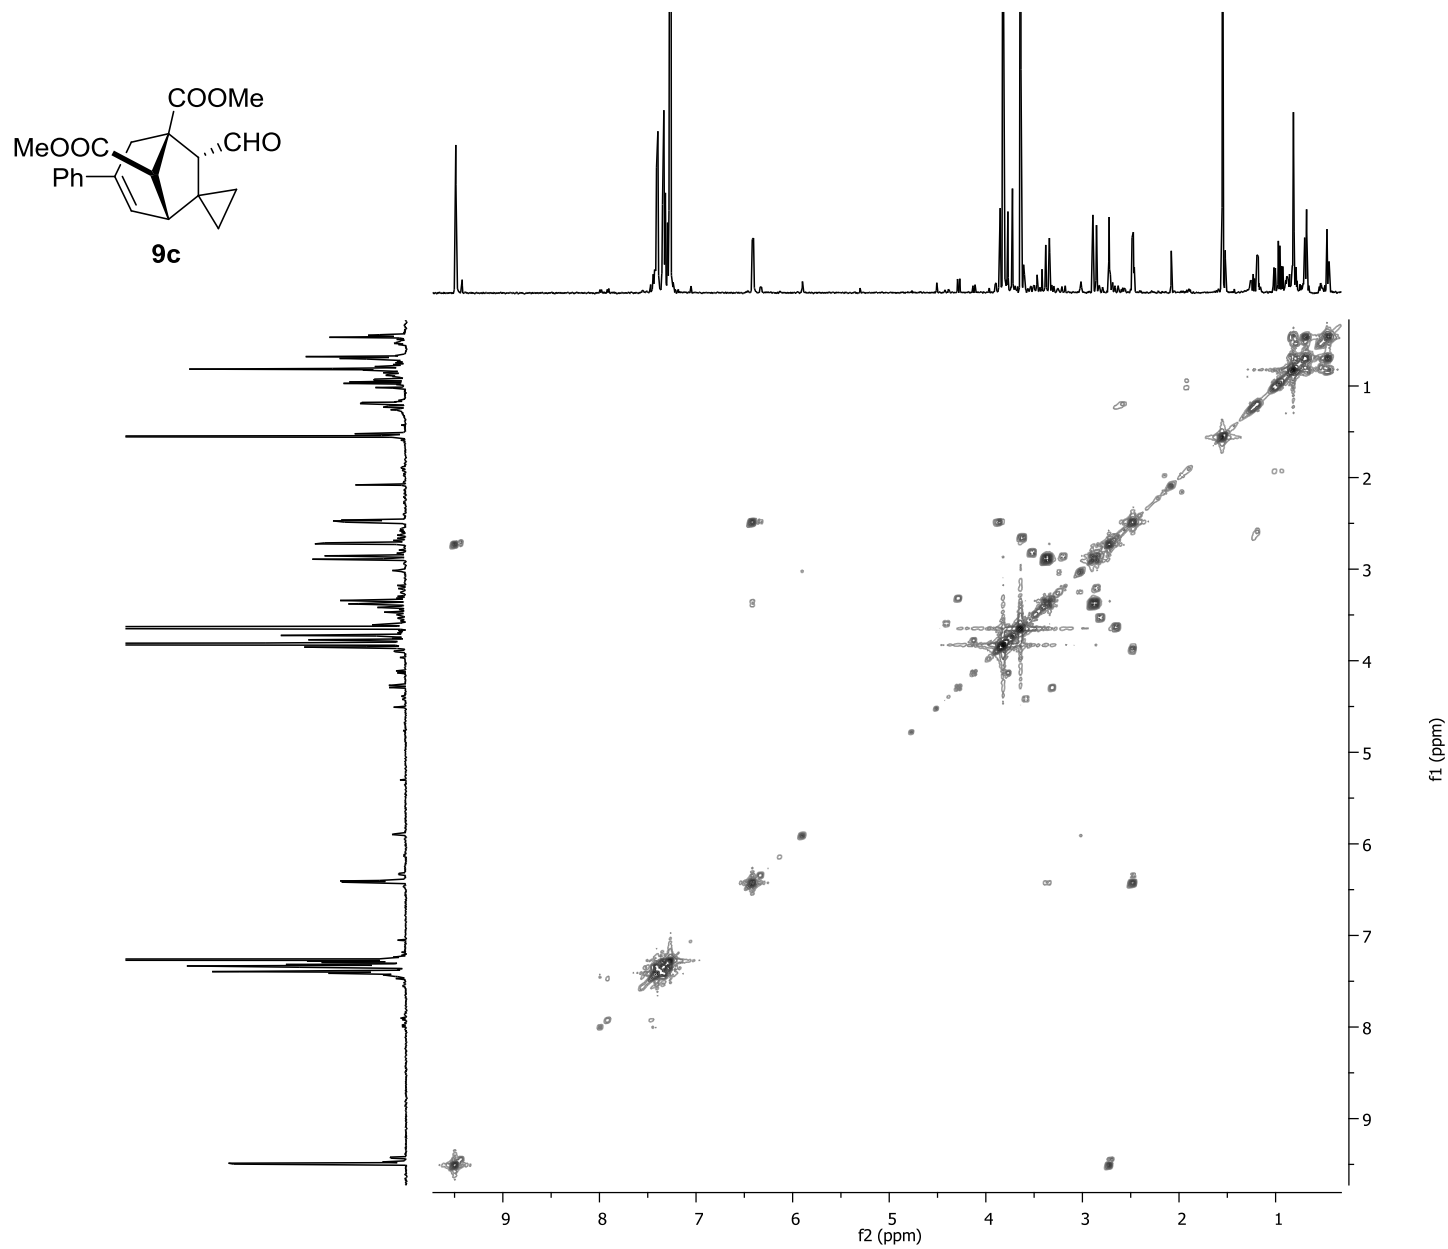

$^1\text{H}$  NMR (500 MHz,  $\text{CDCl}_3$ ):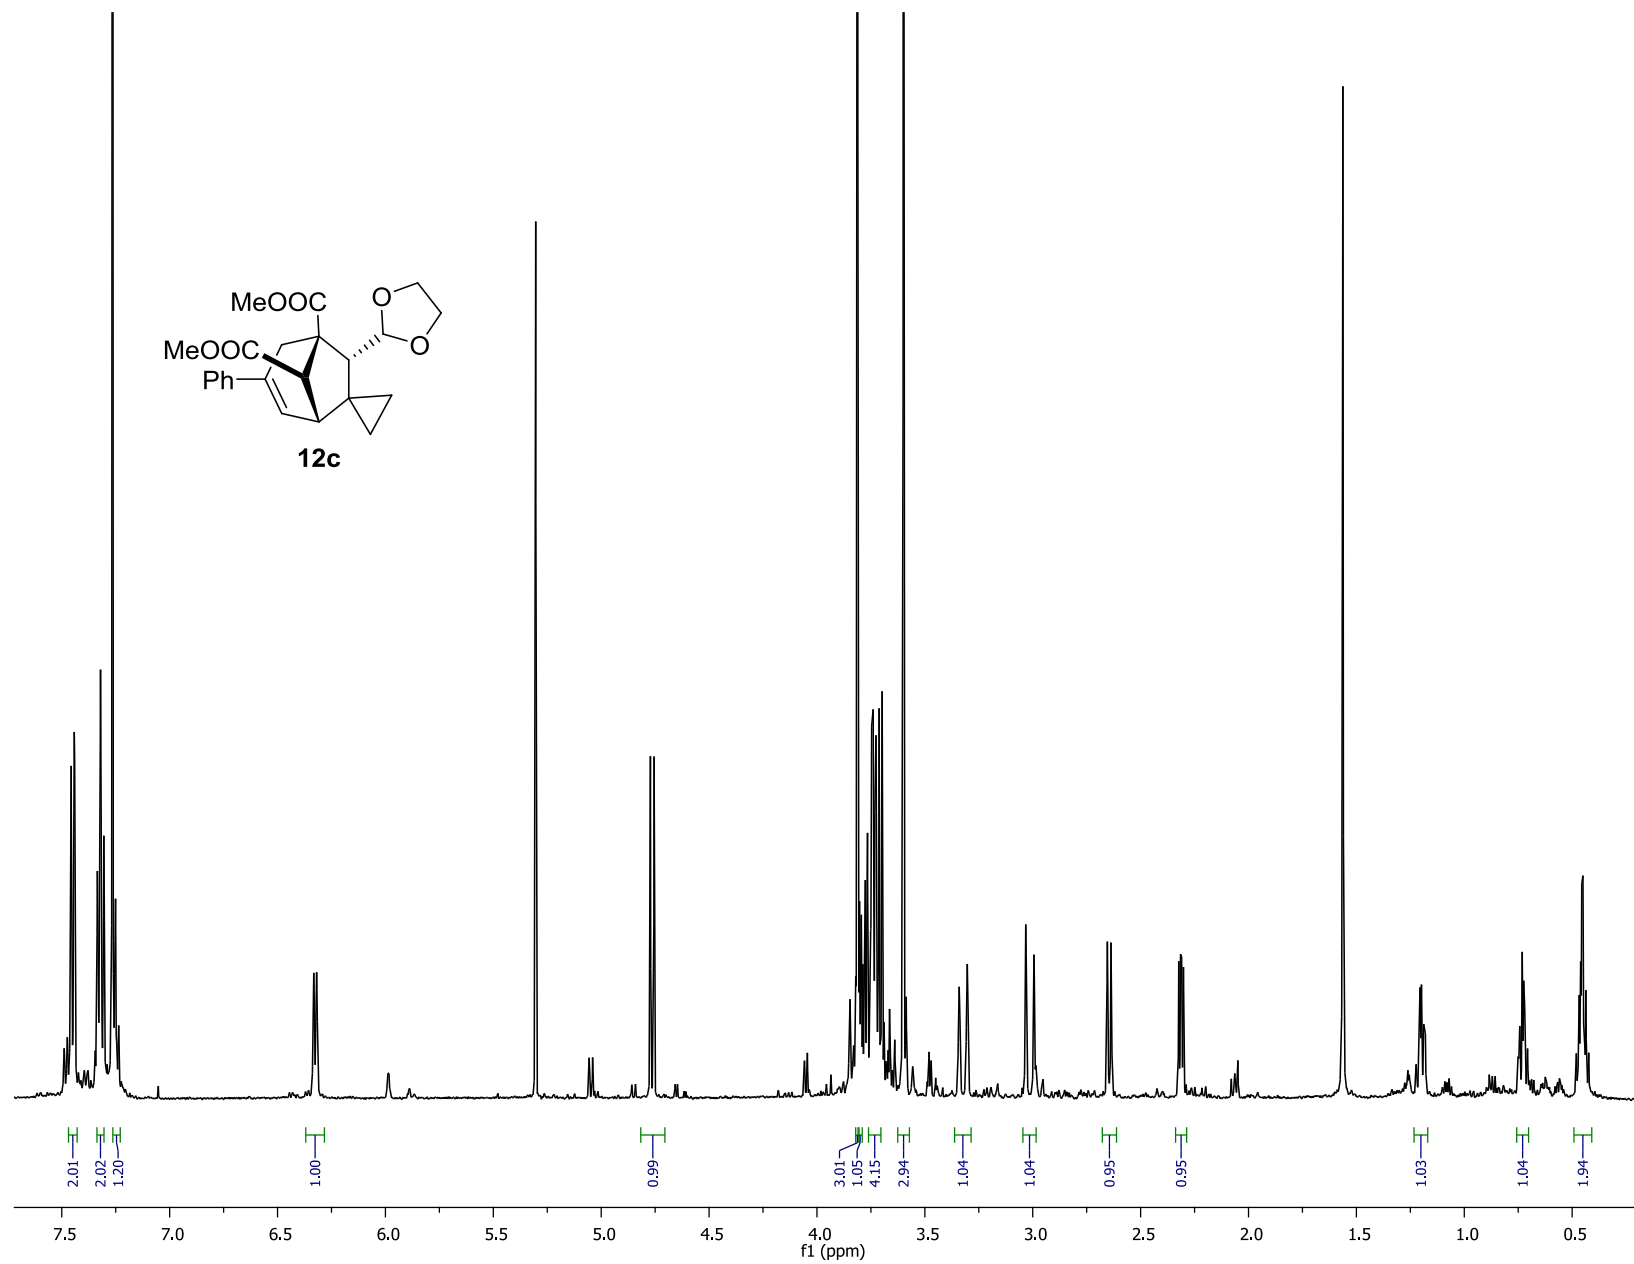

$^{13}\text{C}$  NMR (500 MHz,  $\text{CDCl}_3$ ):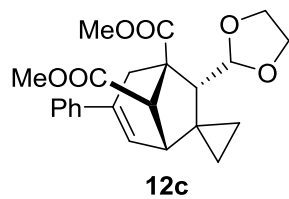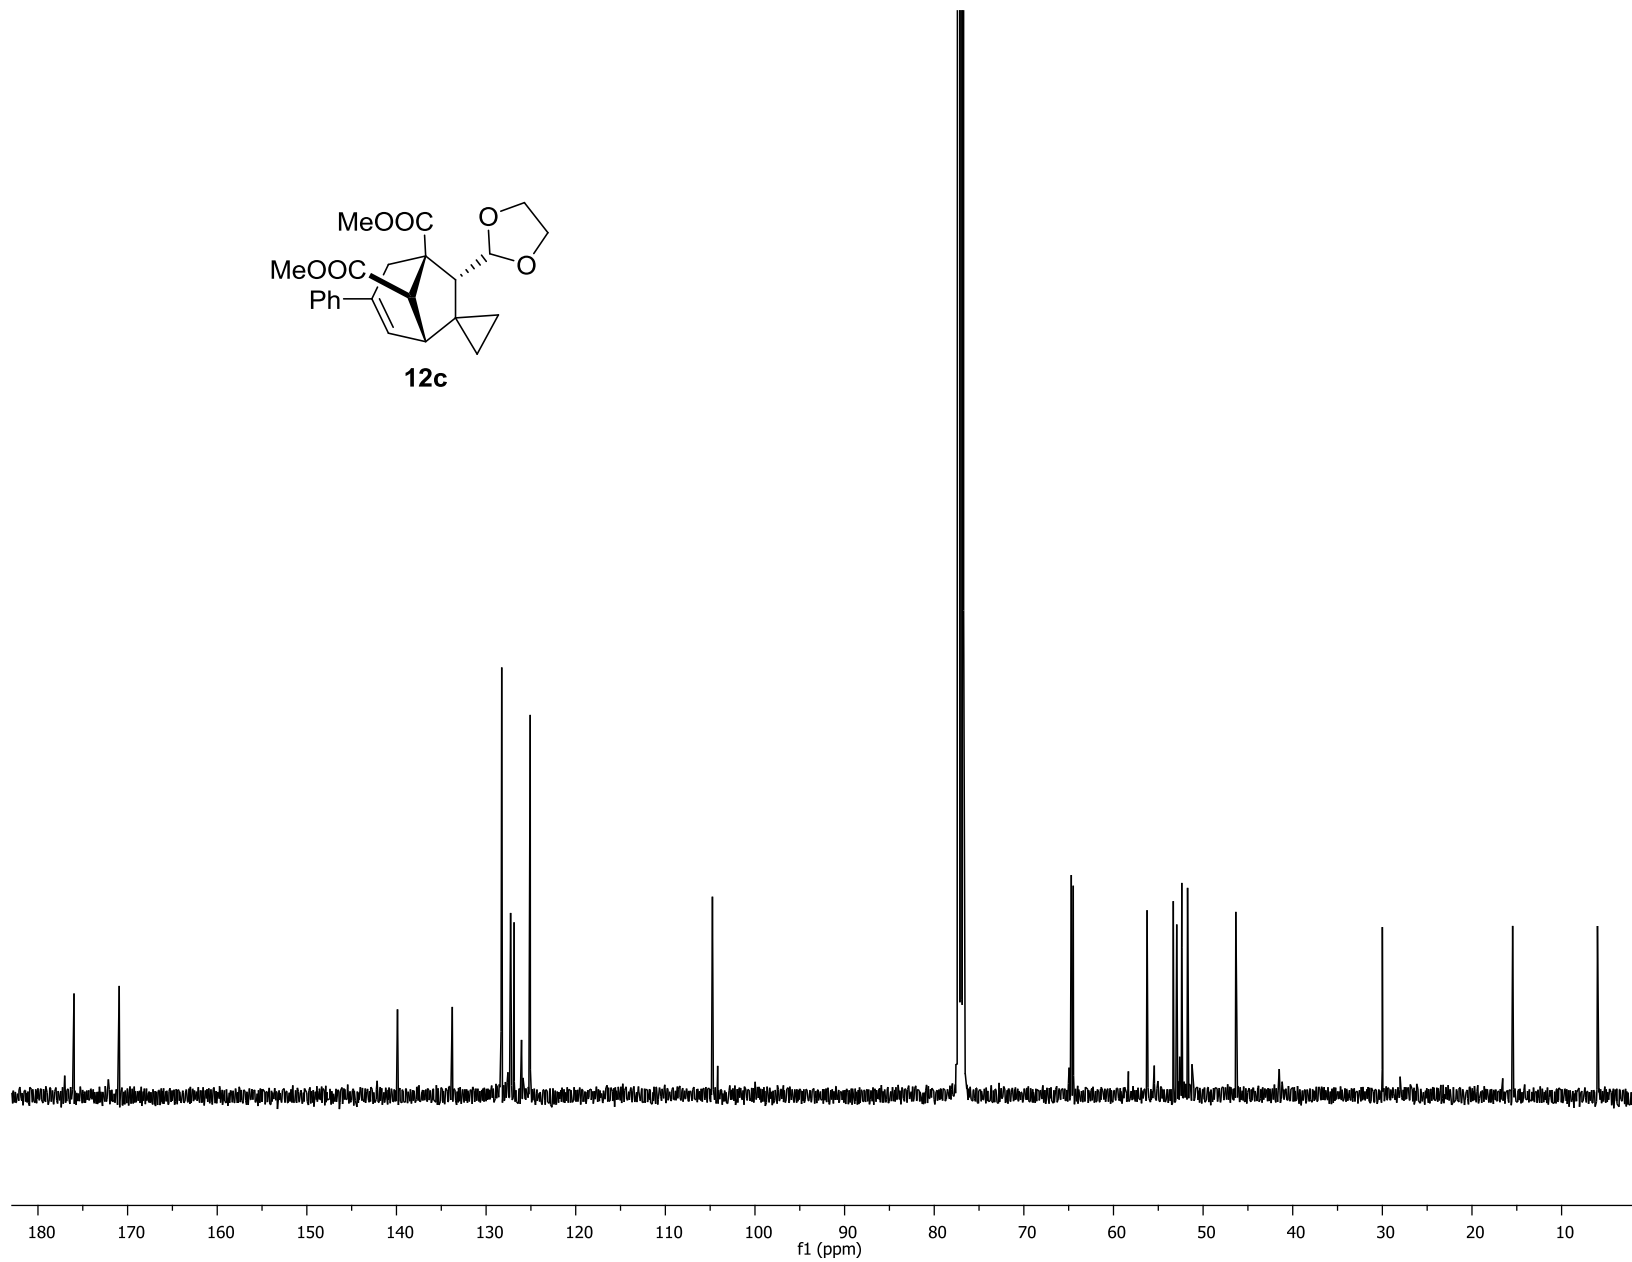

$^1\text{H}$  NMR (500 MHz,  $\text{CDCl}_3$ ):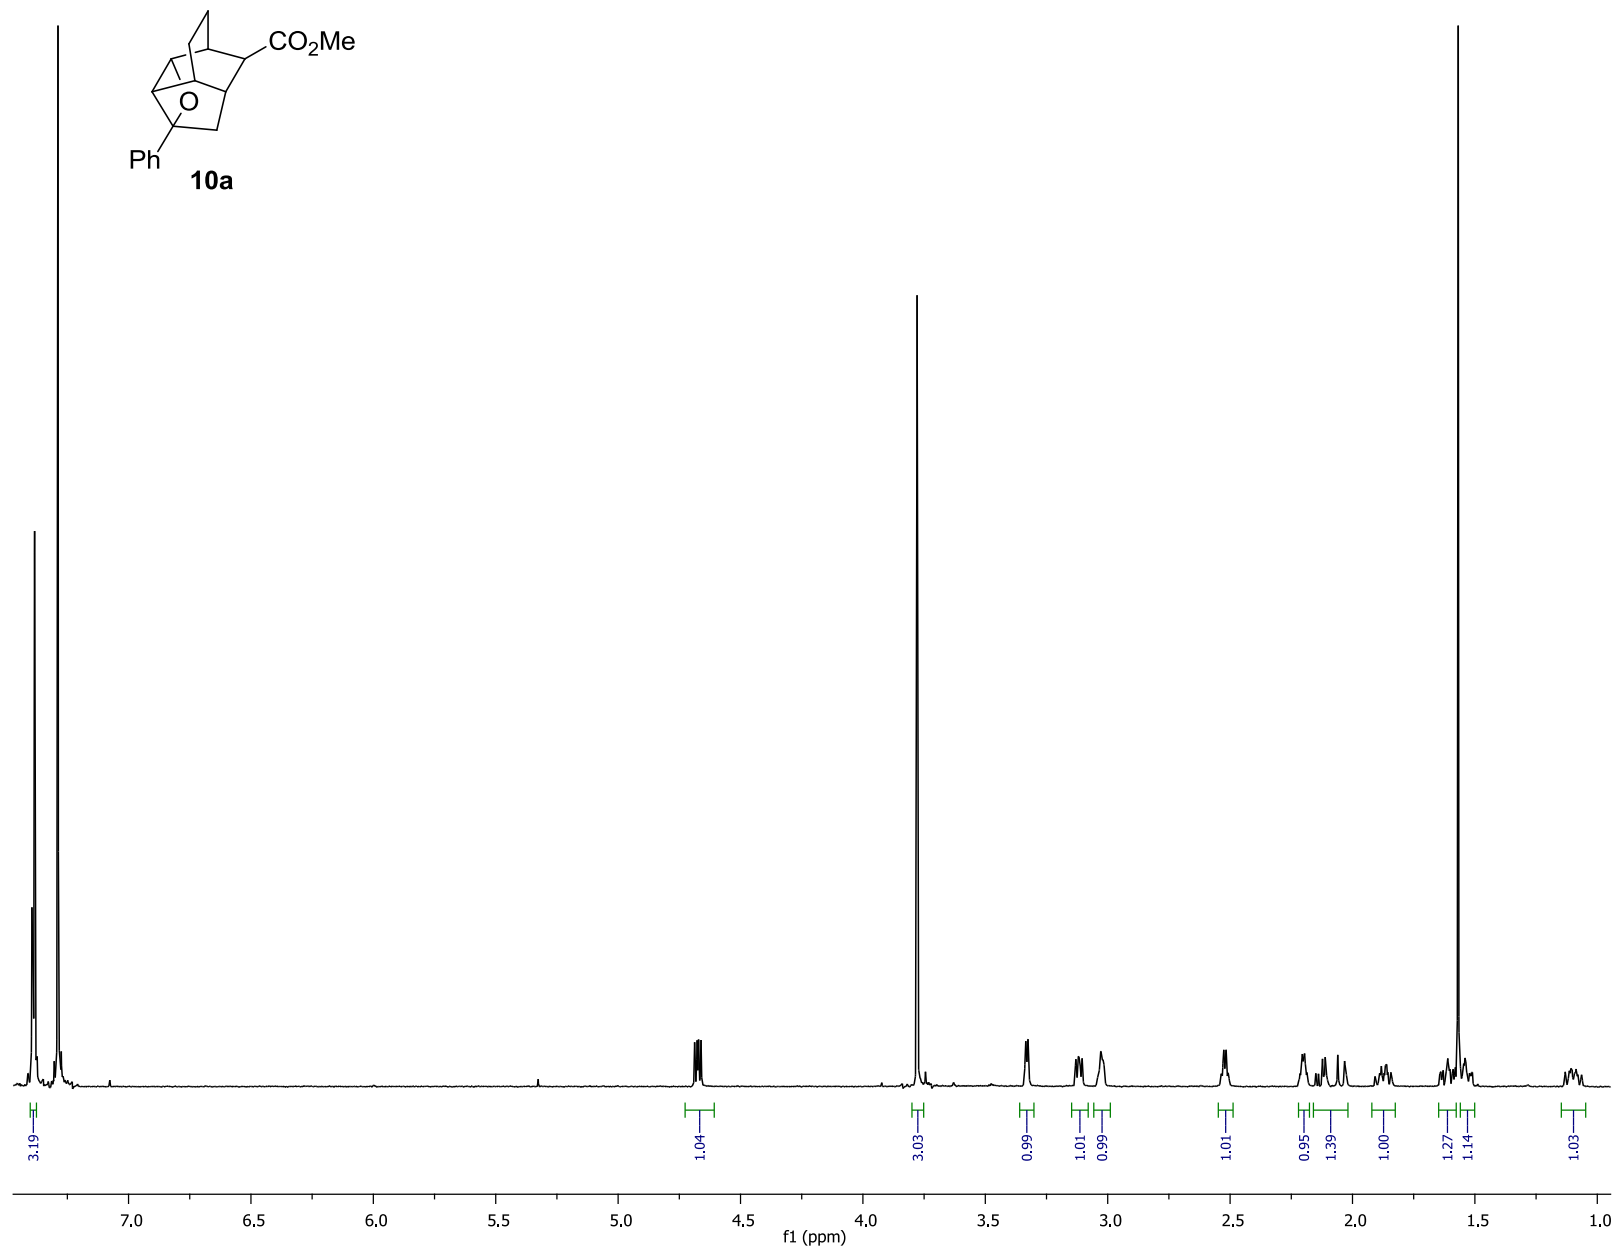

$^{13}\text{C}$  NMR (500 MHz,  $\text{CDCl}_3$ ):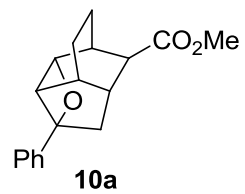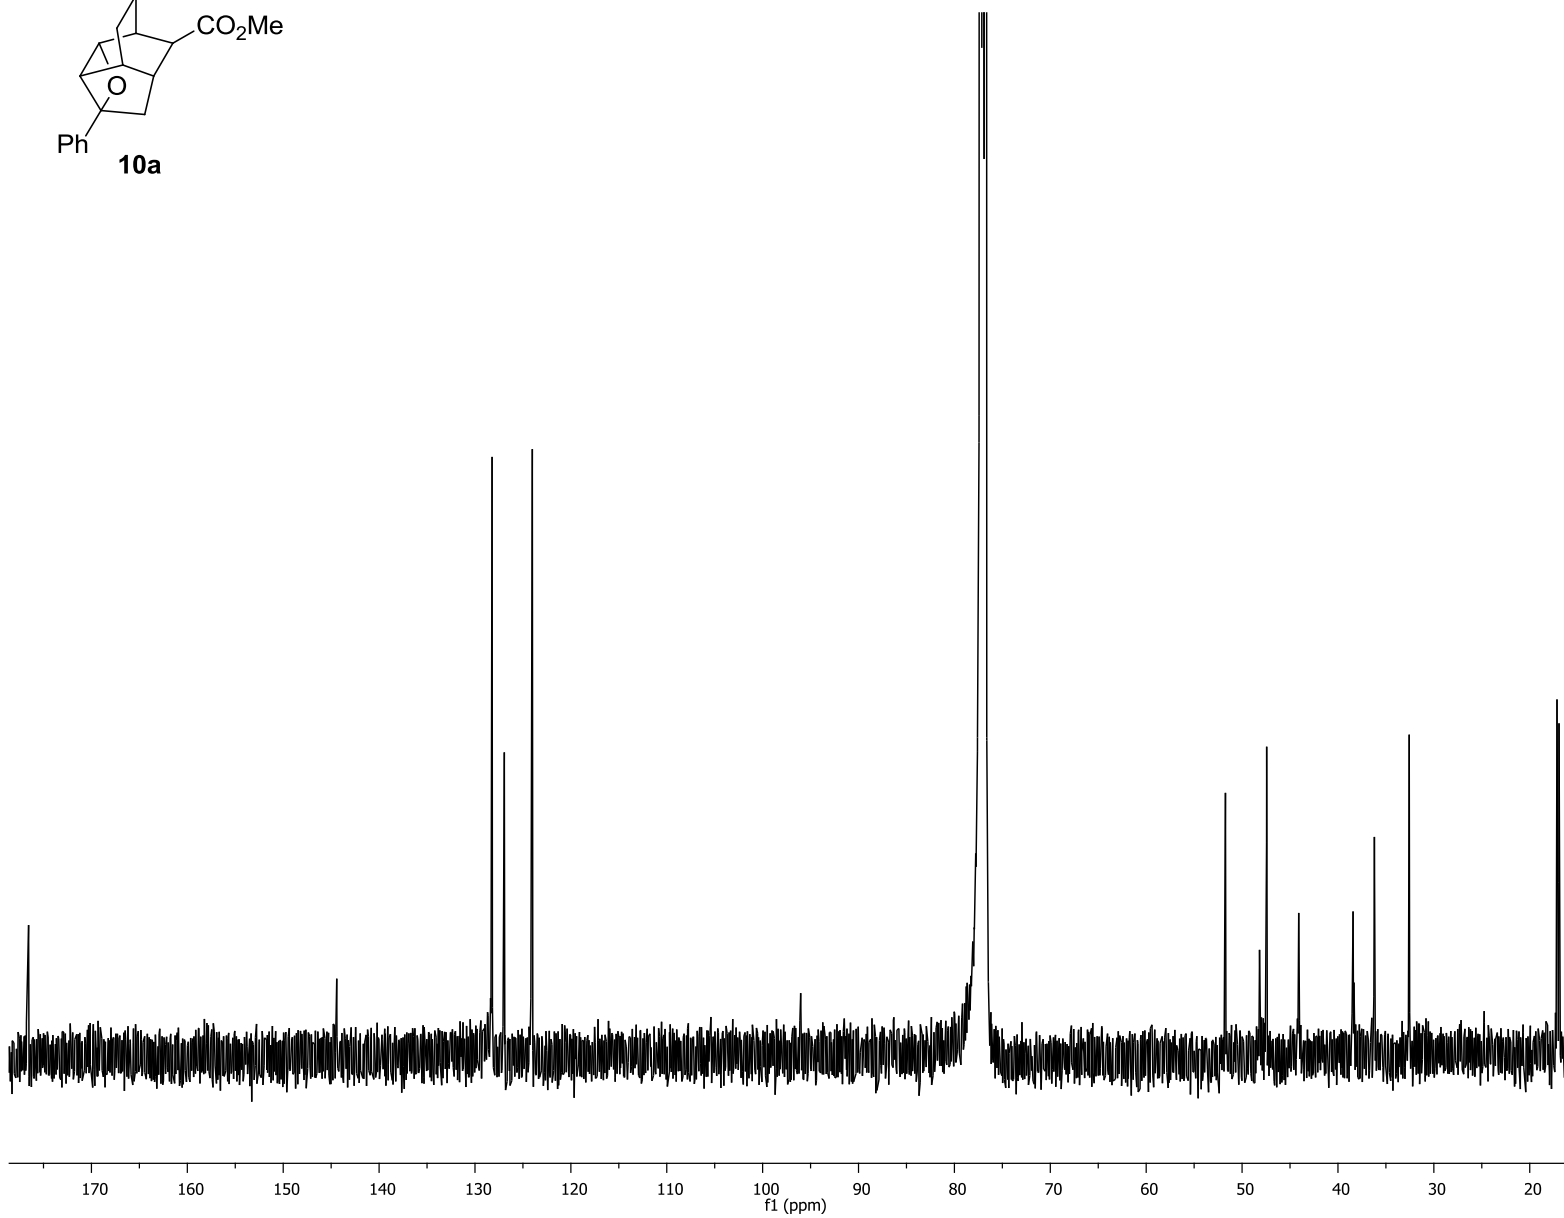



$^1\text{H}$  NMR (500 MHz,  $\text{CDCl}_3$ ):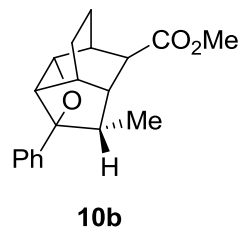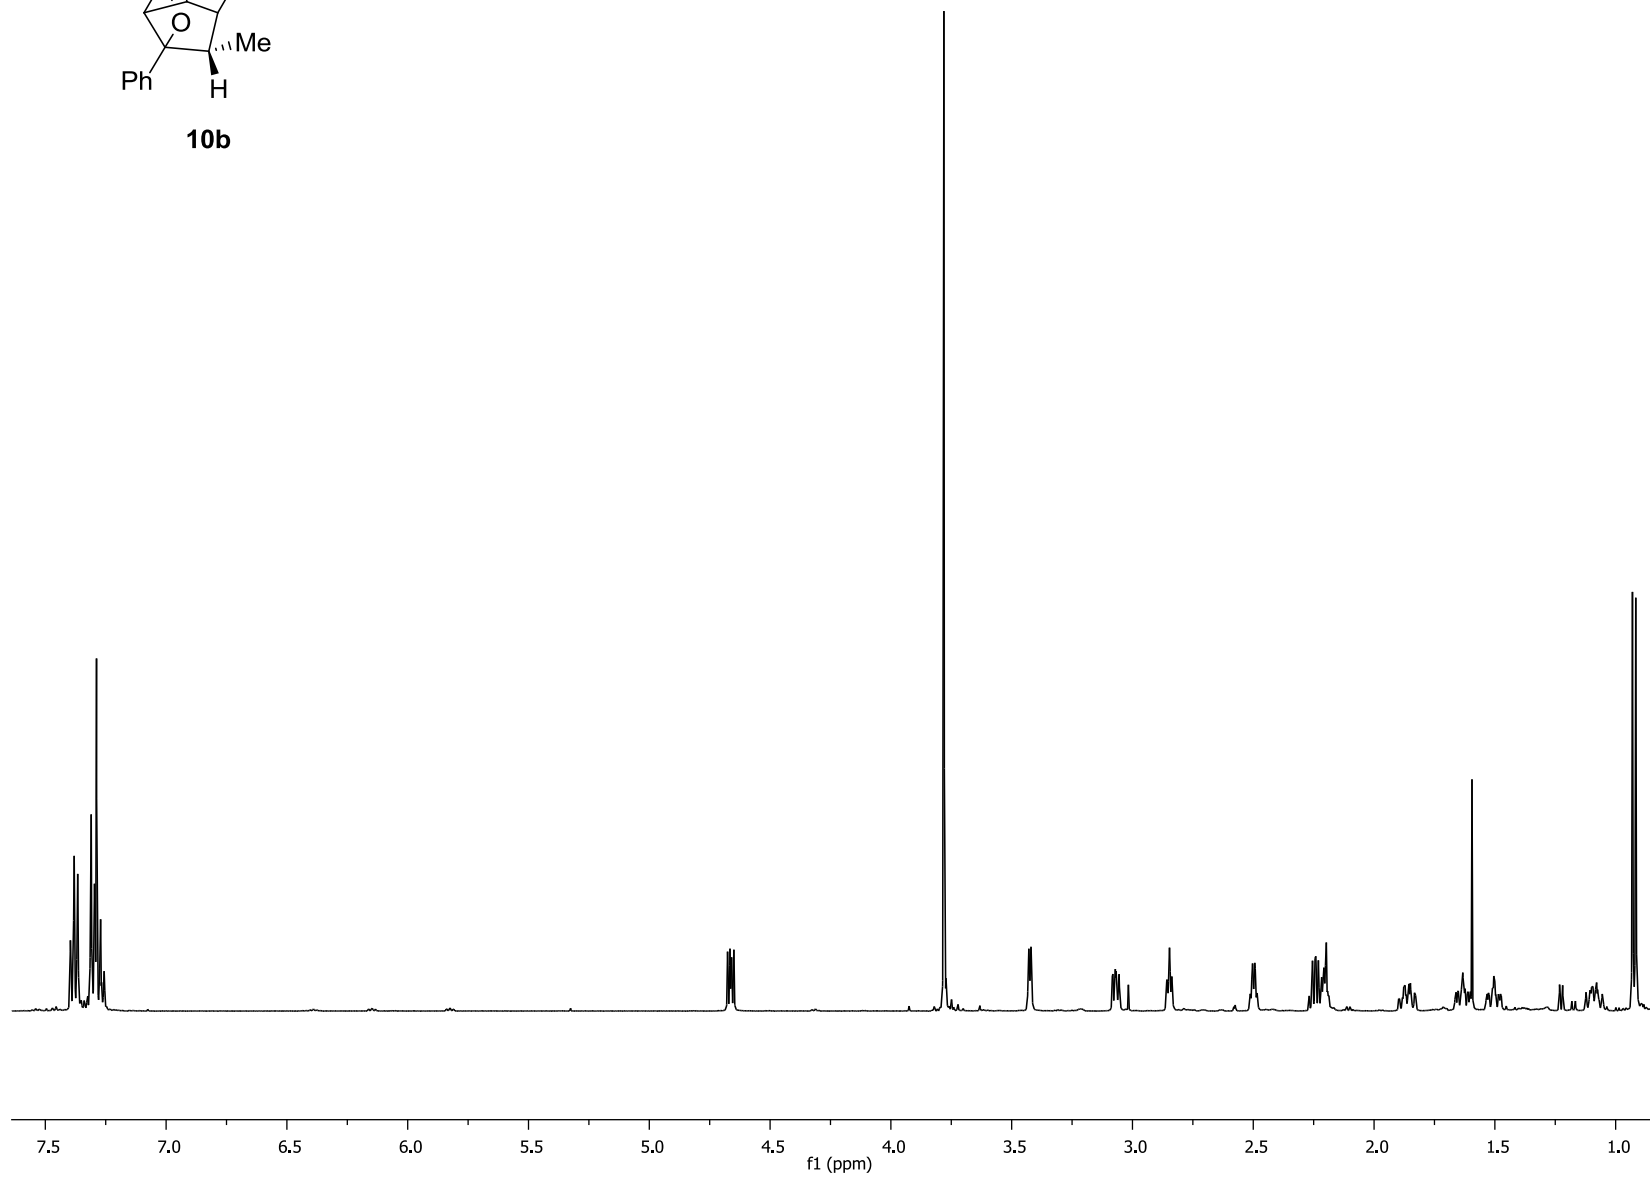

$^{13}\text{C}$  NMR (500 MHz,  $\text{CDCl}_3$ ):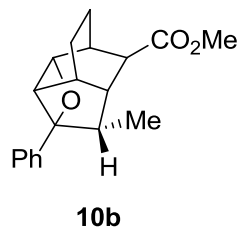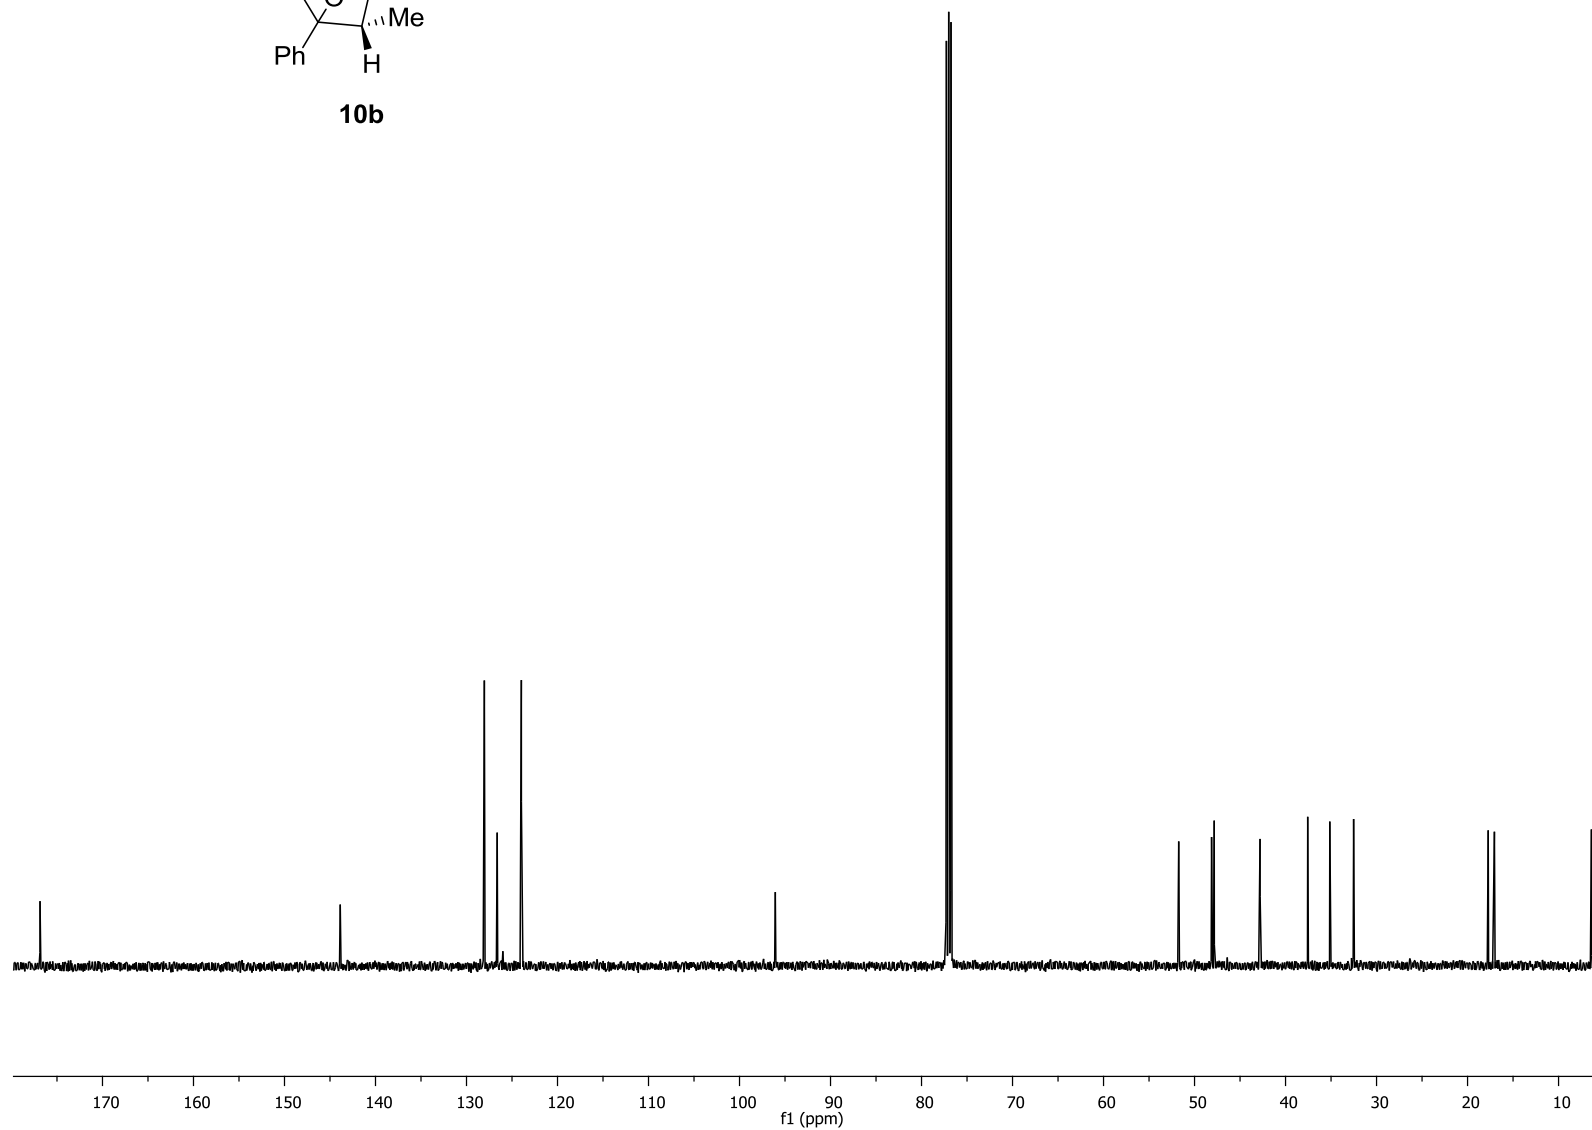

$^1\text{H}$  NMR (500 MHz,  $\text{CDCl}_3$ ):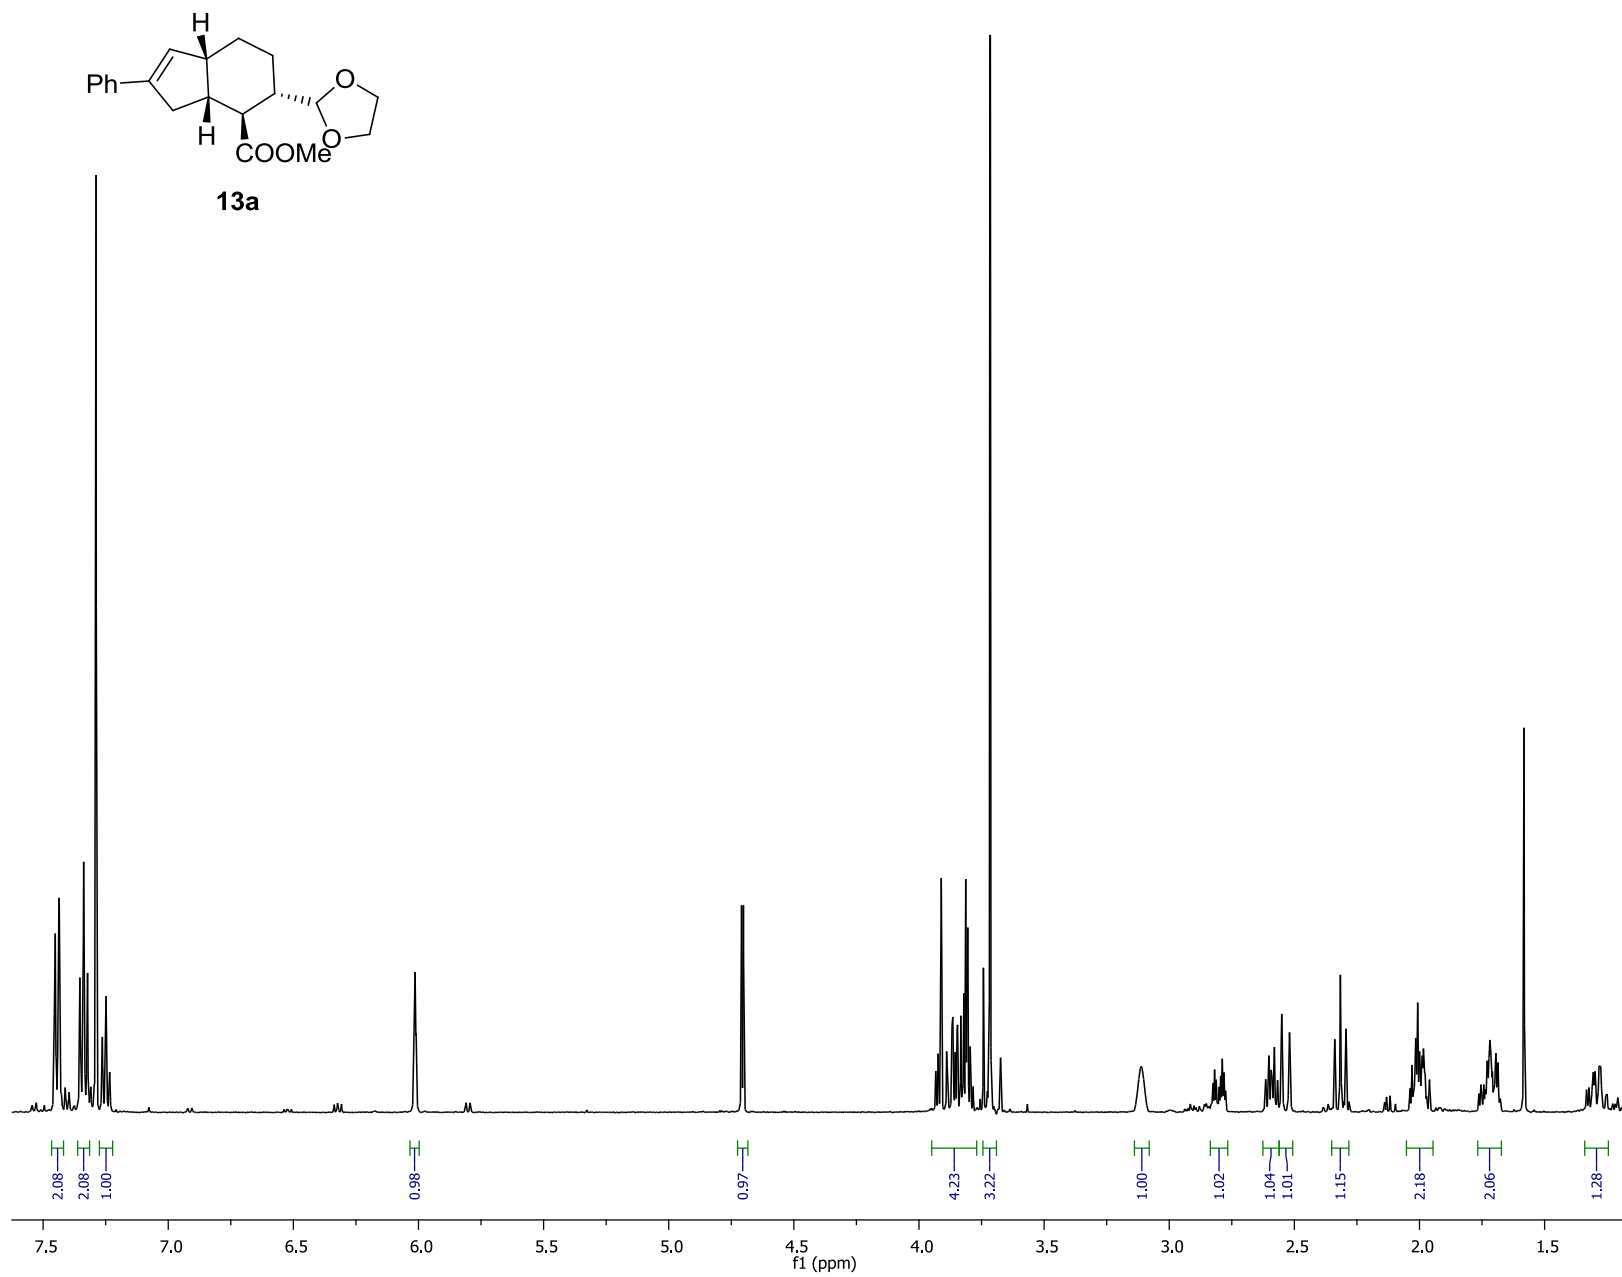

$^{13}\text{C}$  NMR (500 MHz,  $\text{CDCl}_3$ ):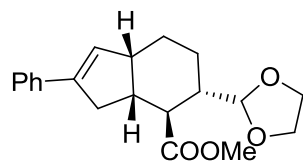**13a**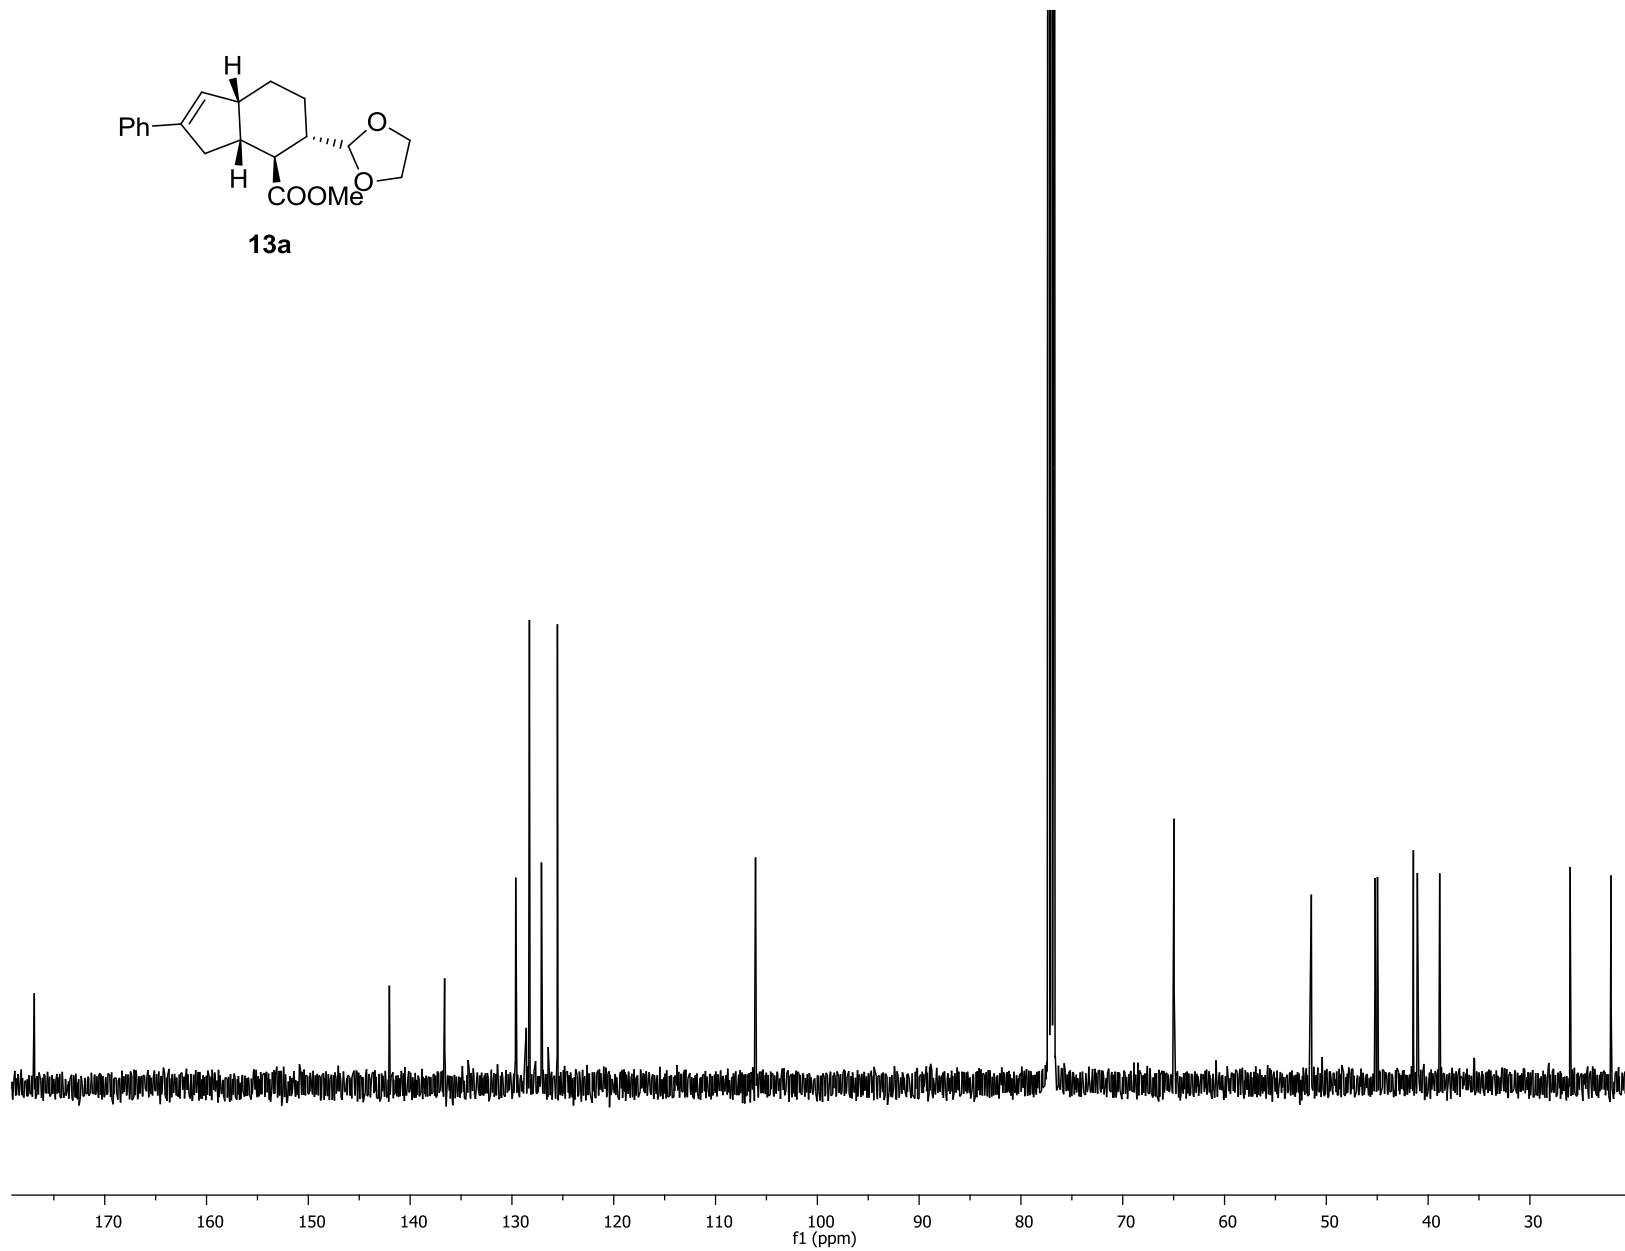

COSY (500 MHz, CDCl<sub>3</sub>):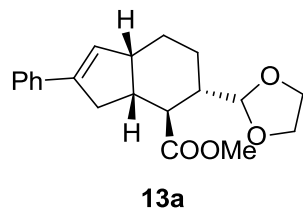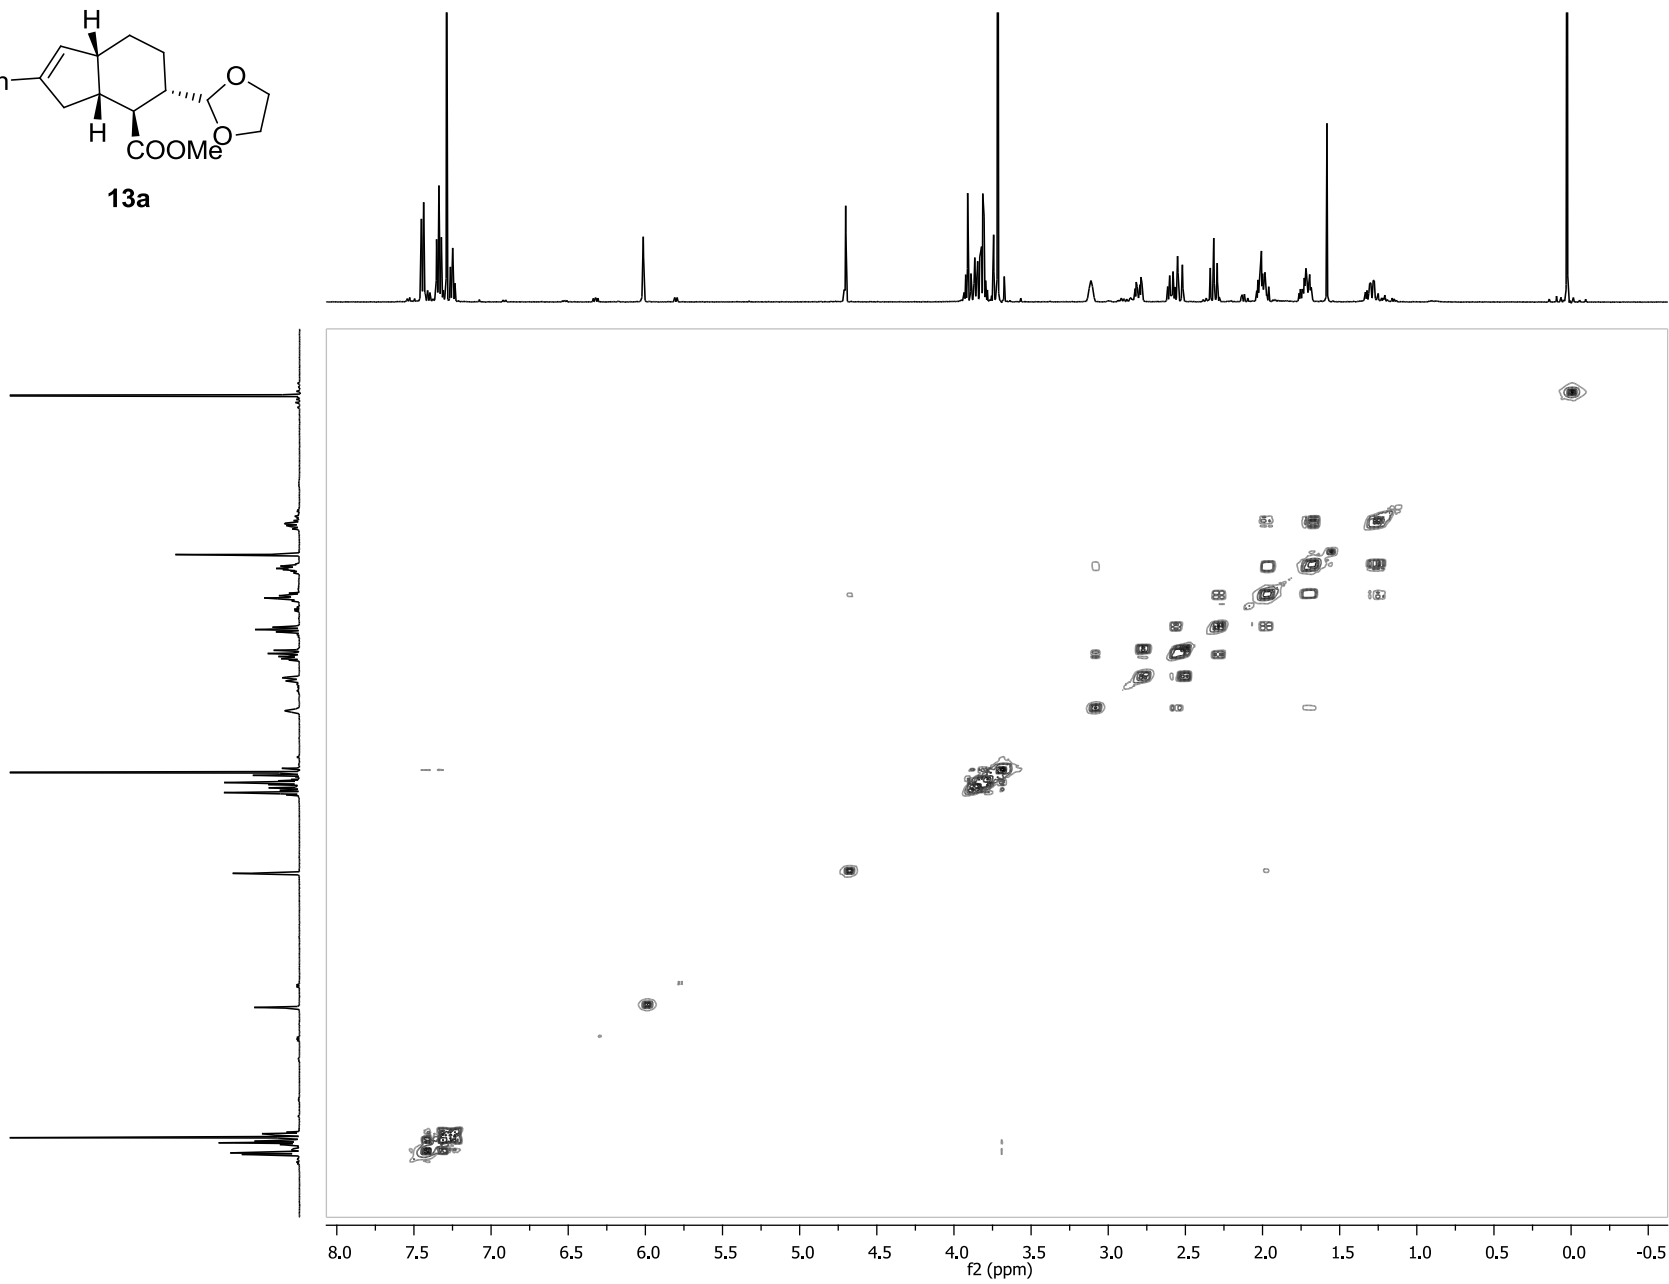

$^1\text{H}$  NMR (500 MHz,  $\text{CDCl}_3$ ):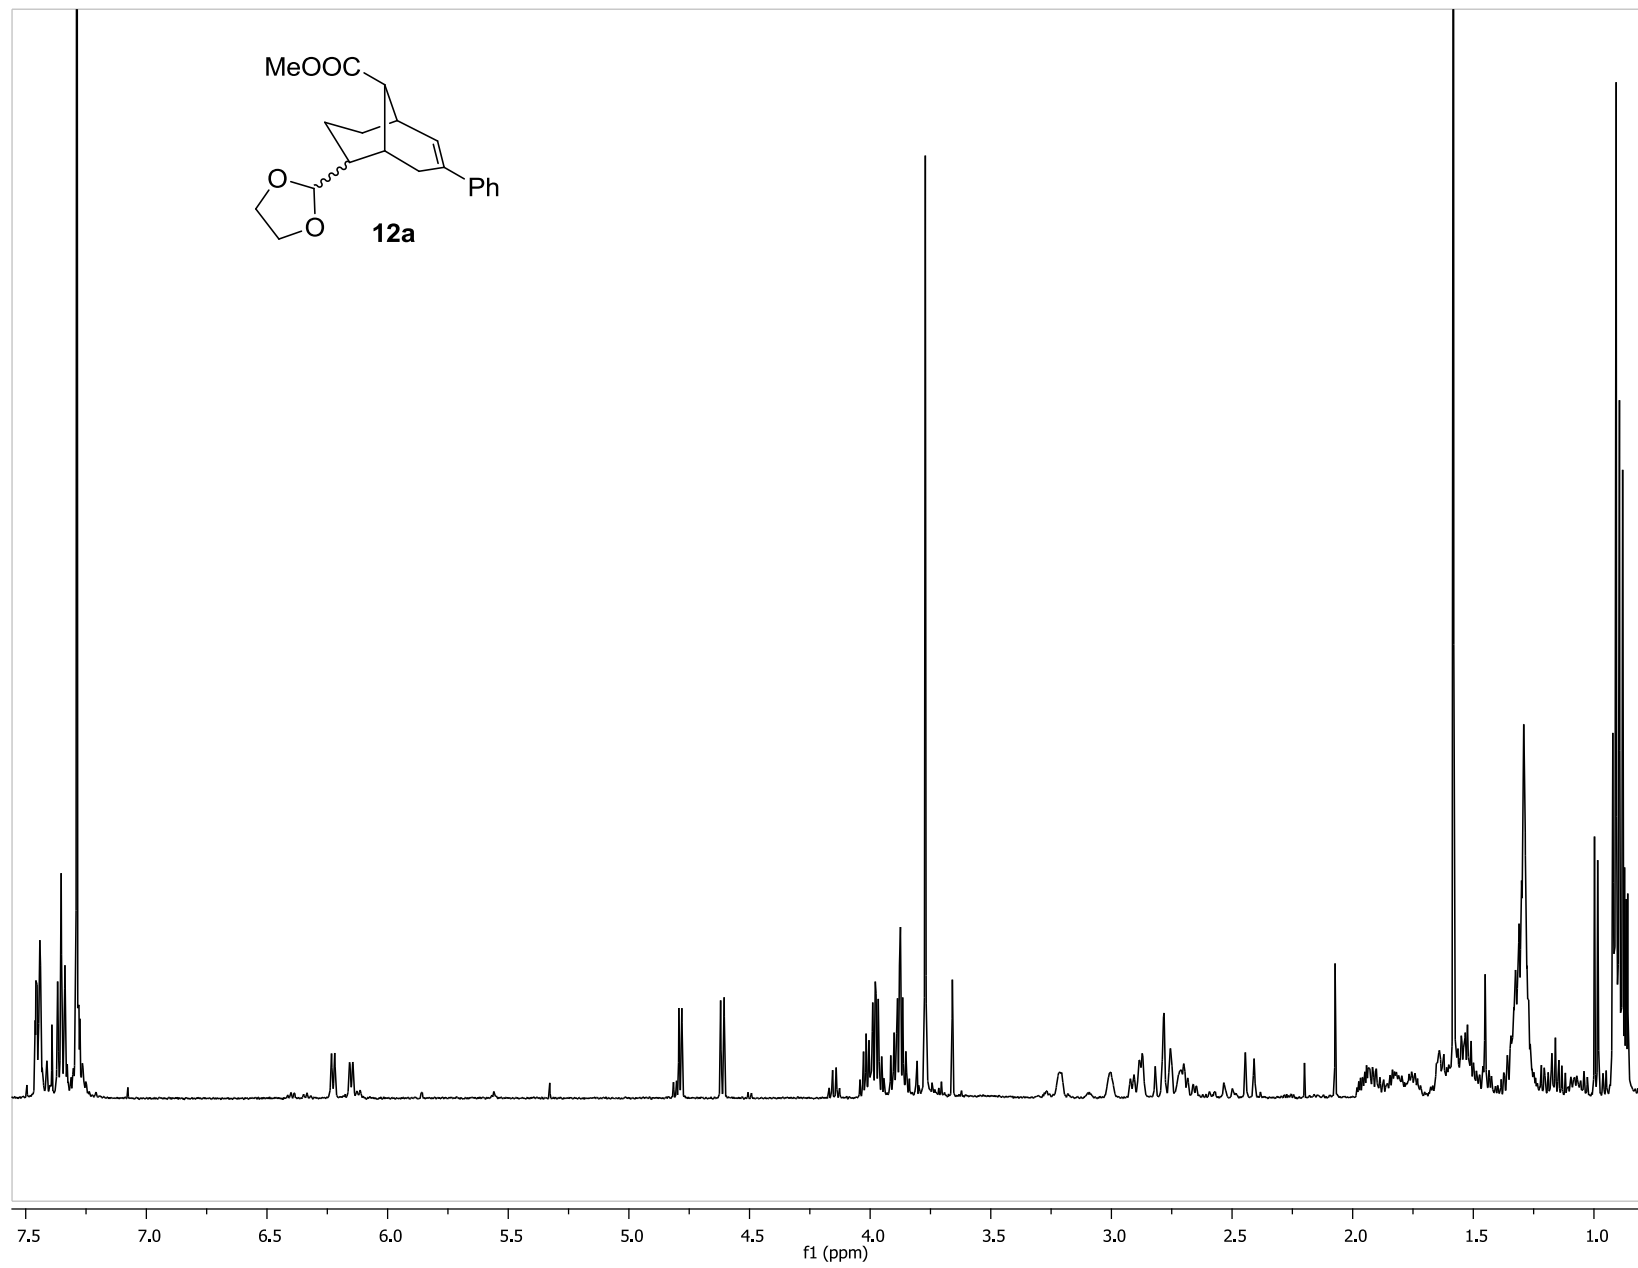

$^1\text{H}$  NMR (500 MHz,  $\text{CDCl}_3$ ):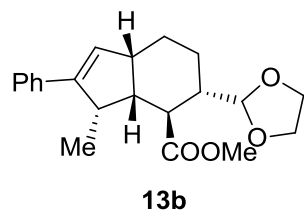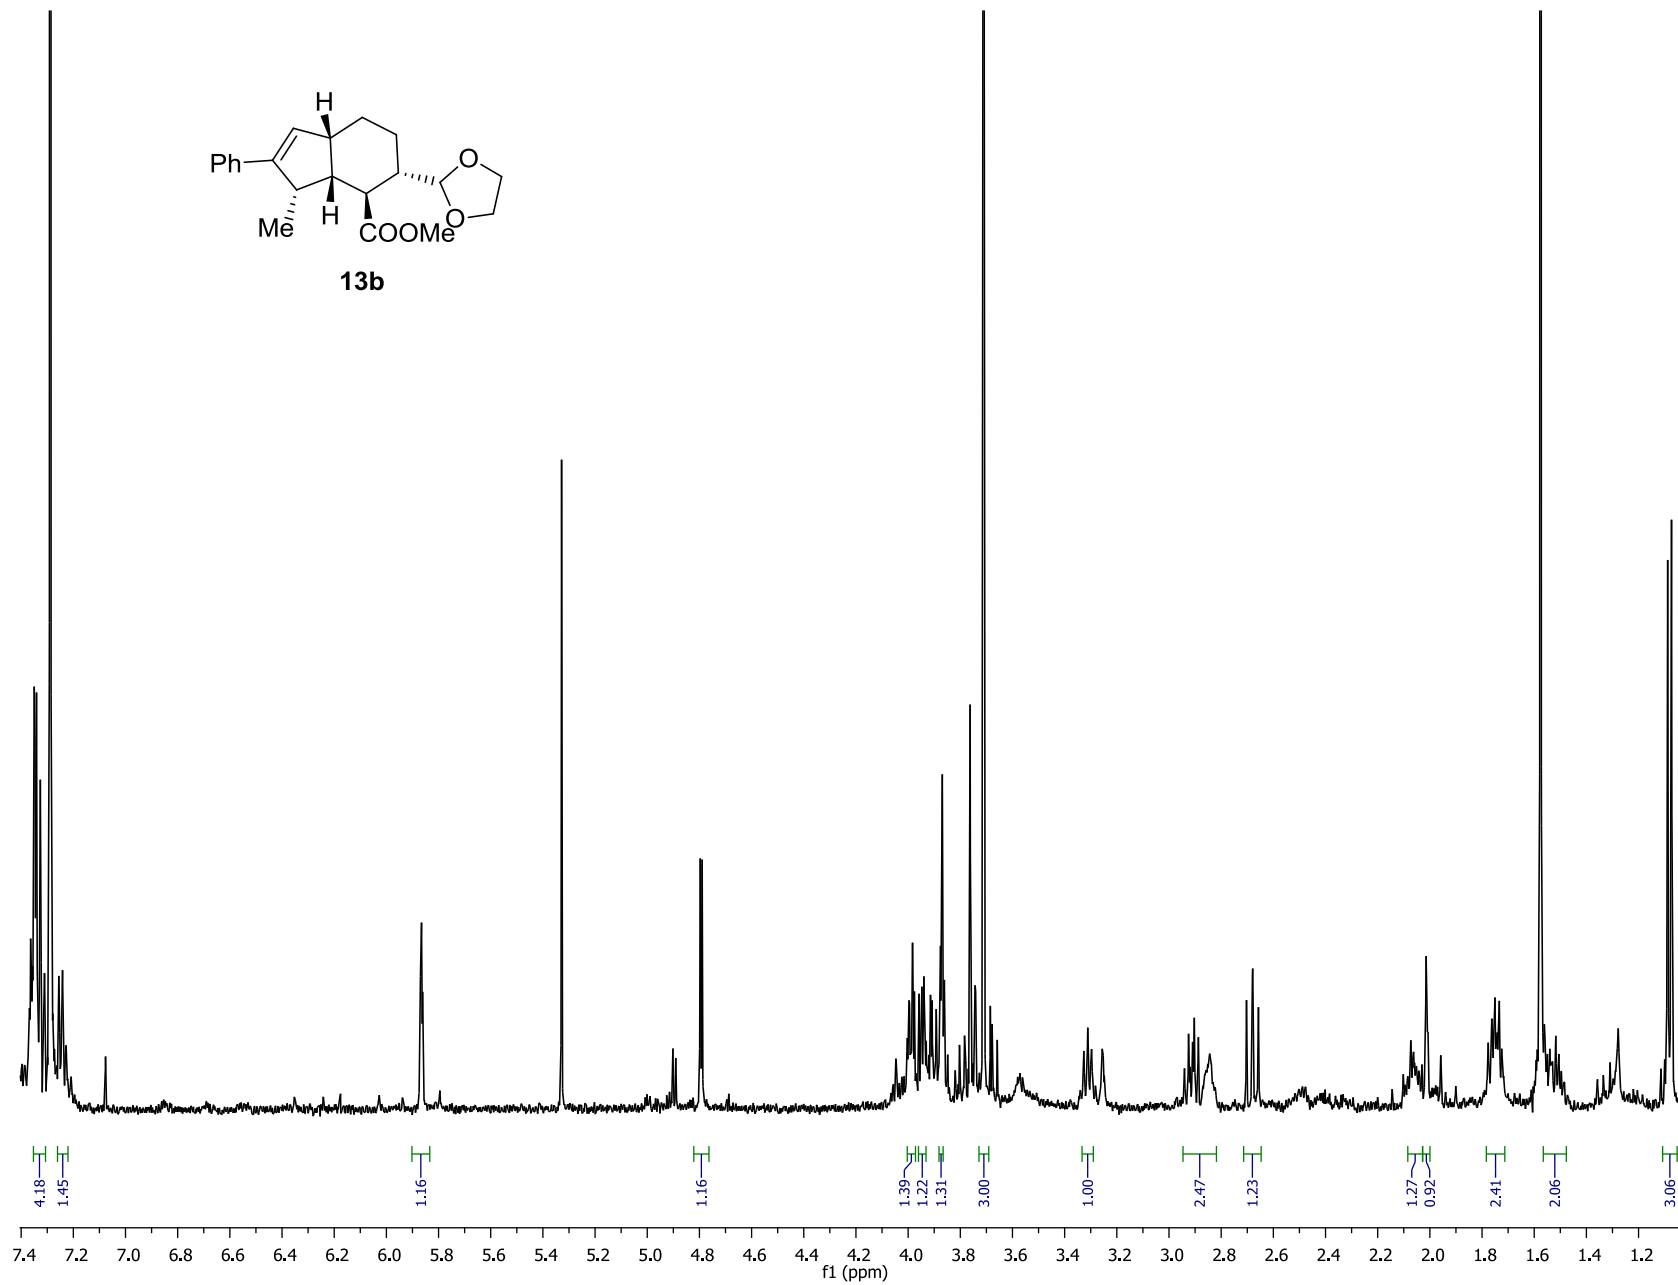

$^1\text{H}$  NMR (500 MHz,  $\text{CDCl}_3$ ):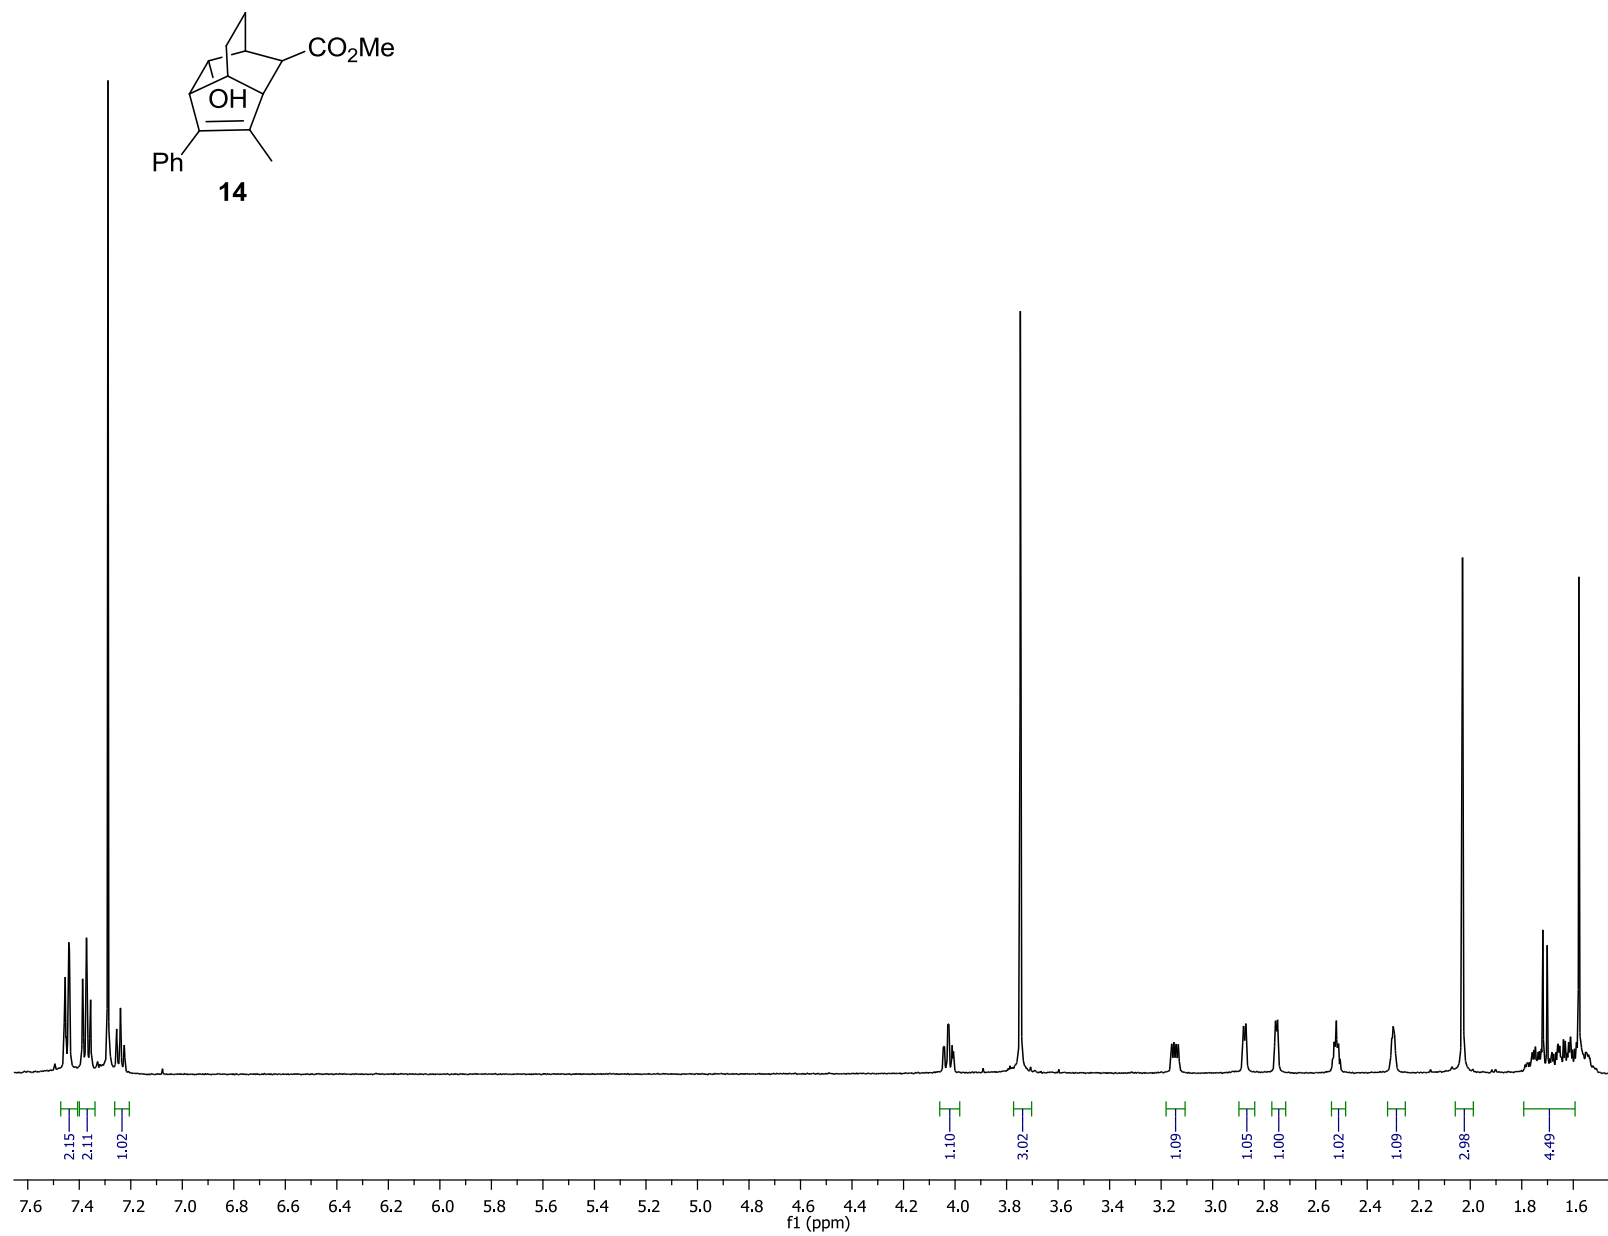



$^{13}\text{C}$  NMR (500 MHz,  $\text{CDCl}_3$ ):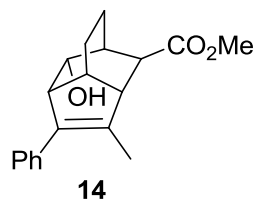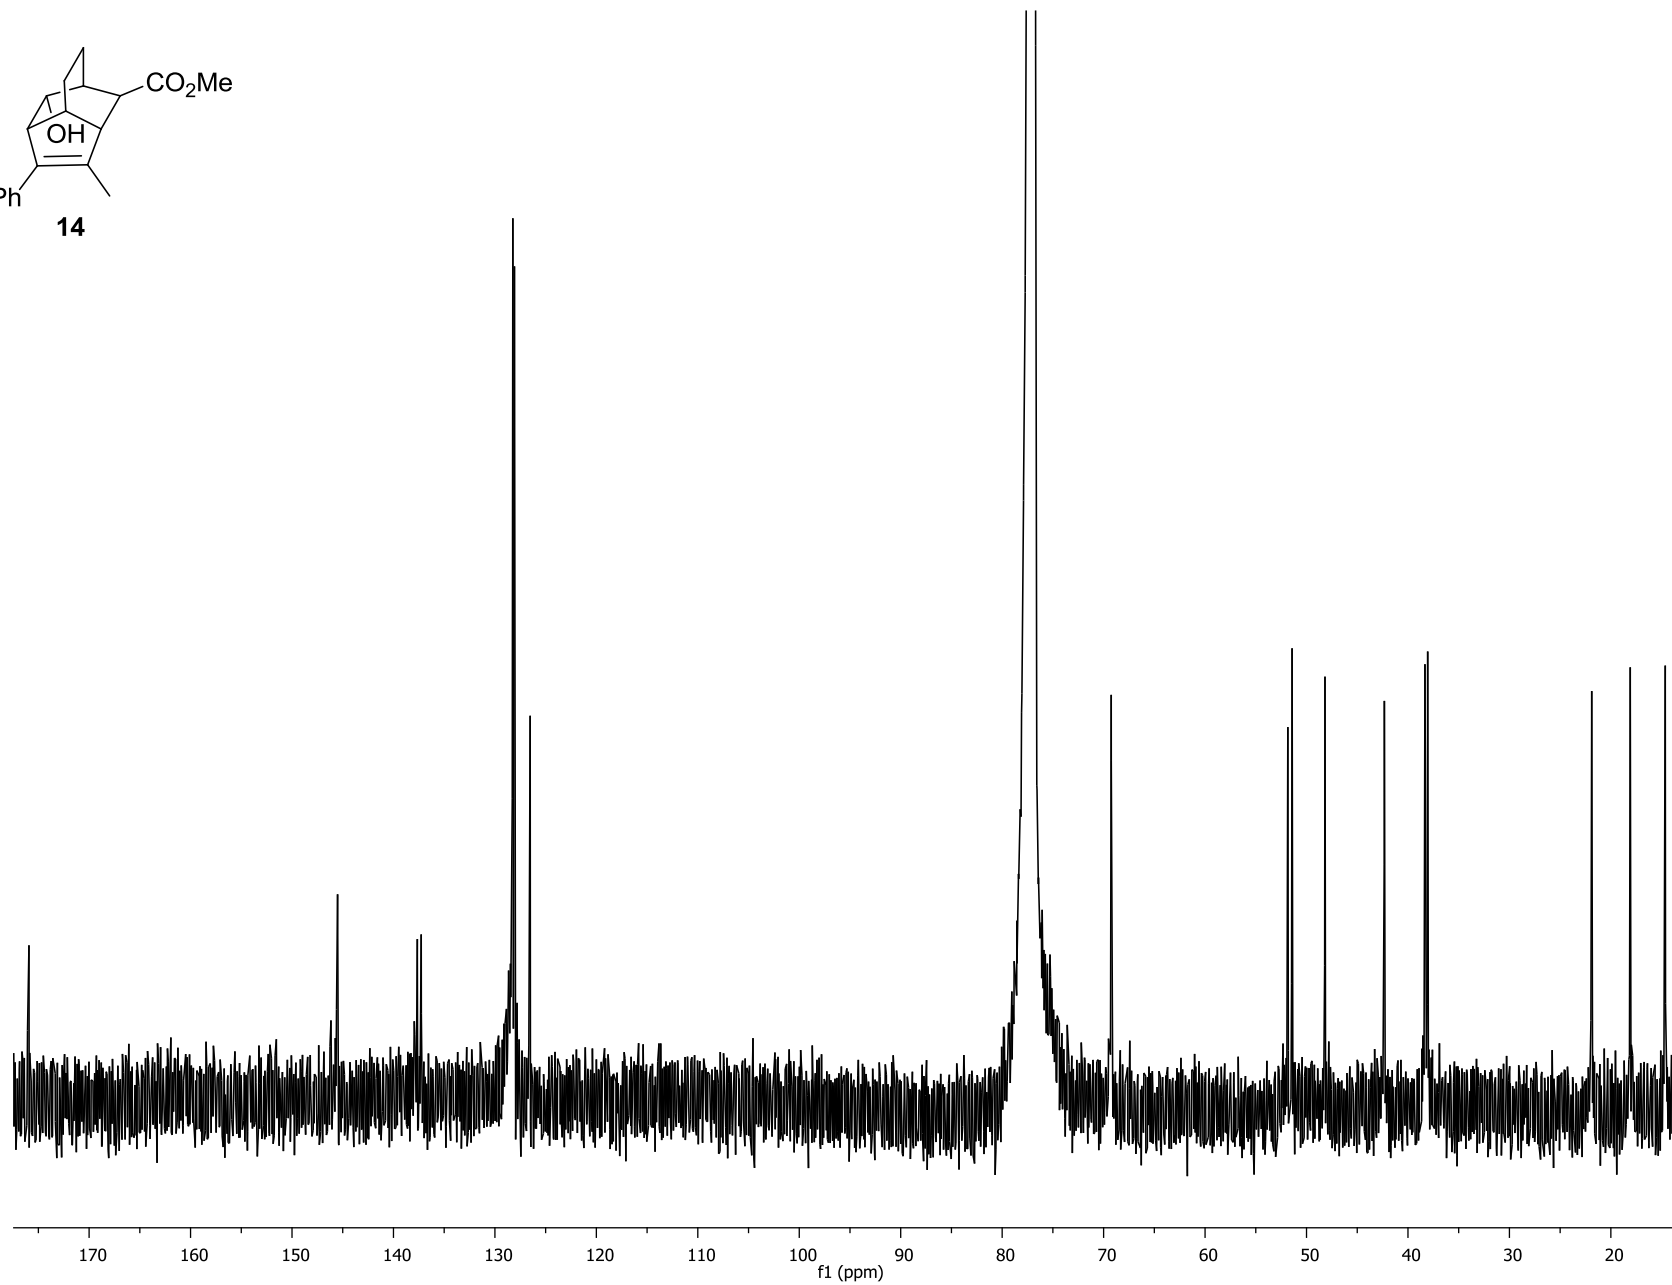

$^1\text{H}$  NMR (500 MHz,  $\text{CDCl}_3$ ):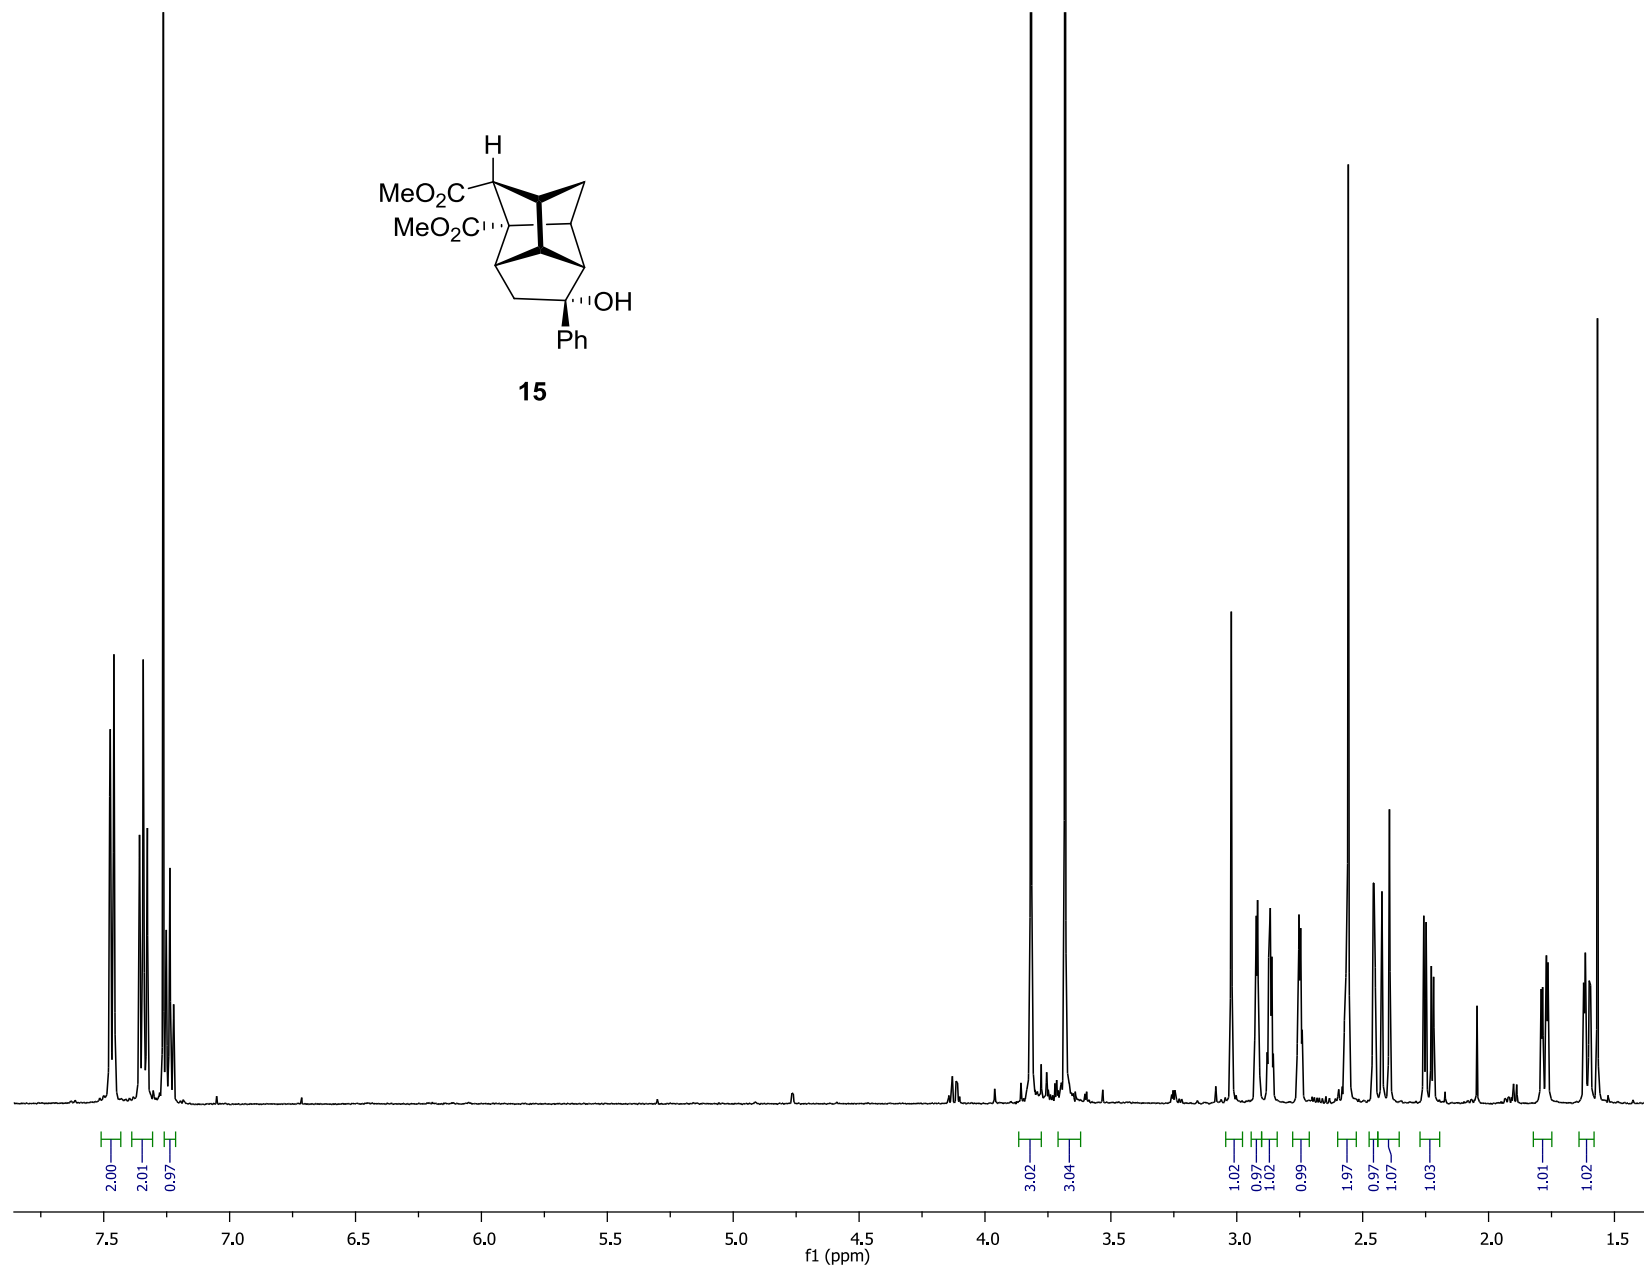

$^{13}\text{C}$  NMR (500 MHz,  $\text{CDCl}_3$ ):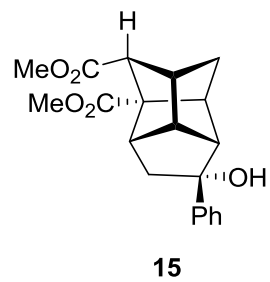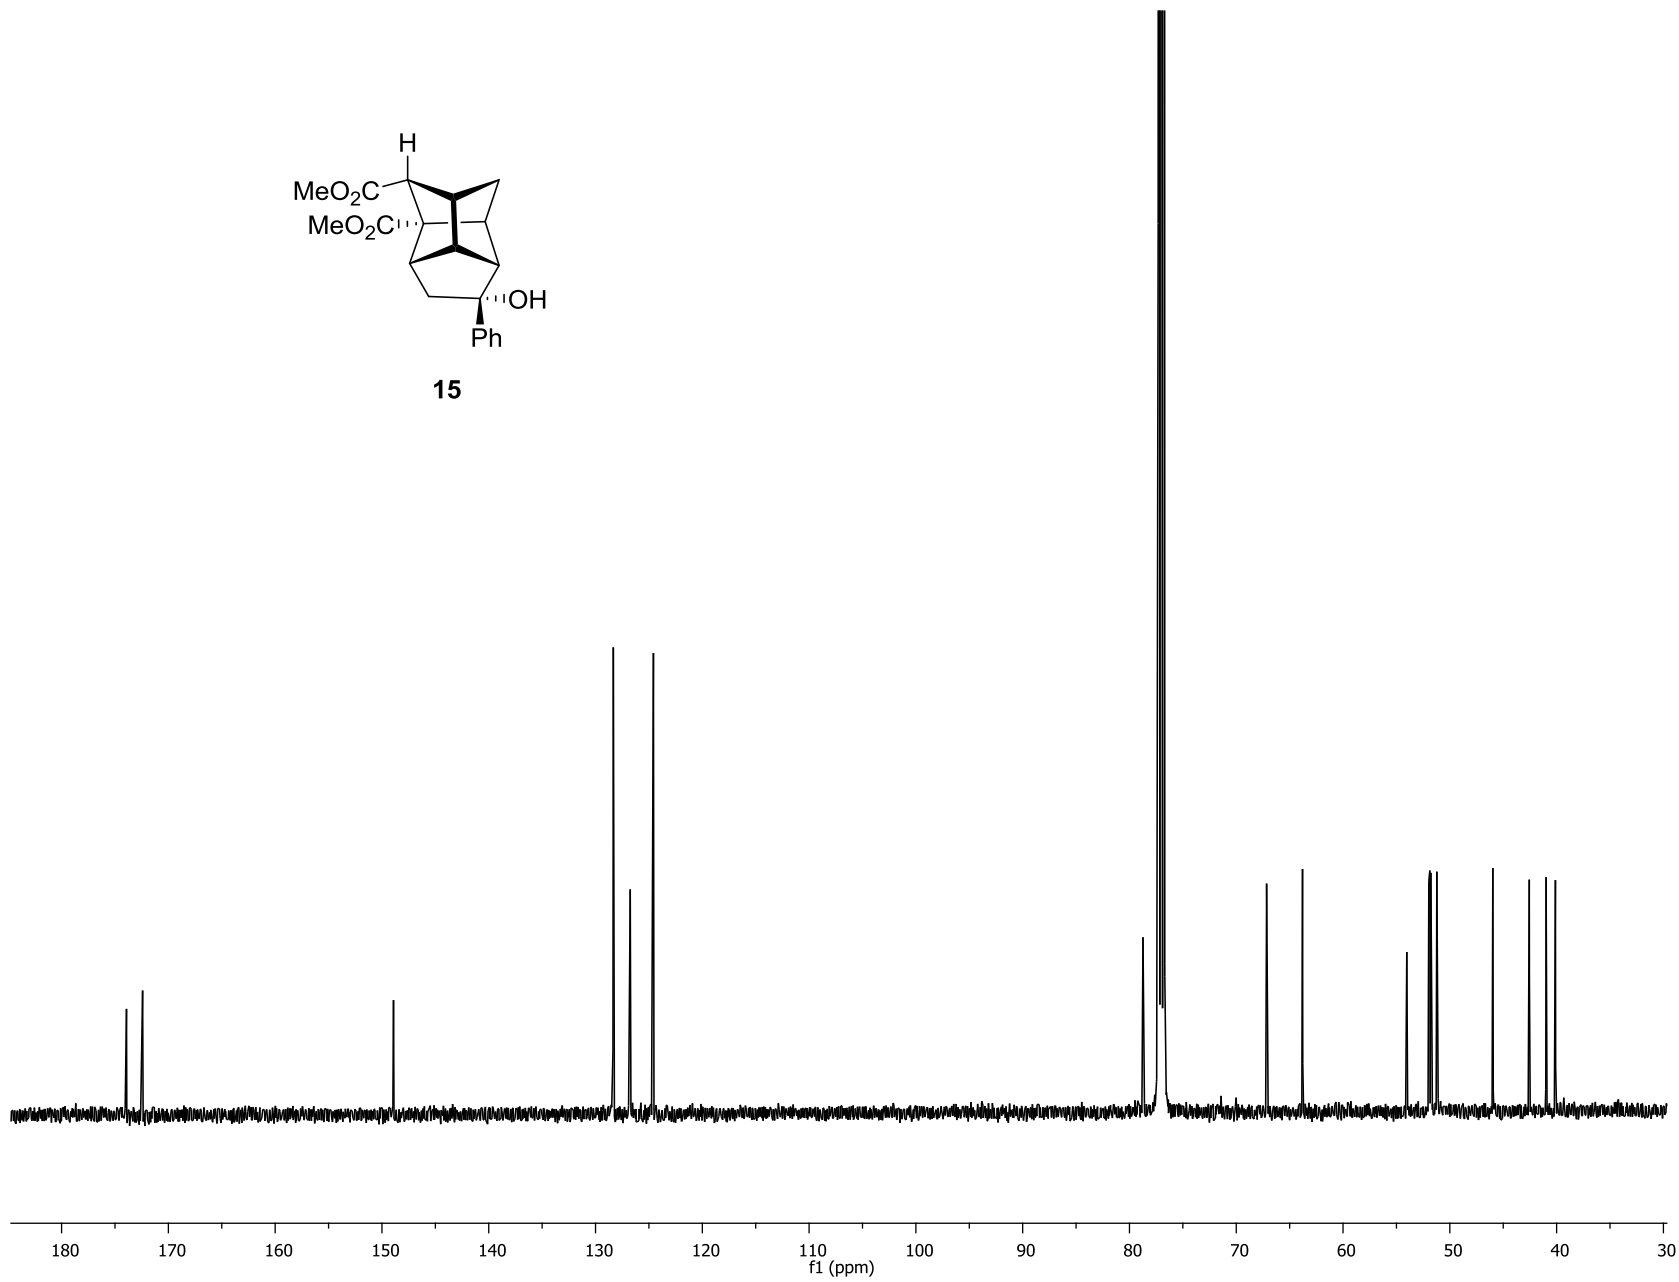

COSY (500 MHz, CDCl<sub>3</sub>):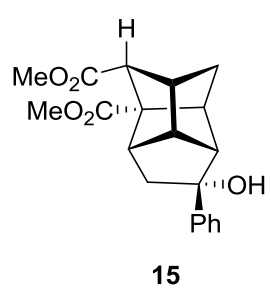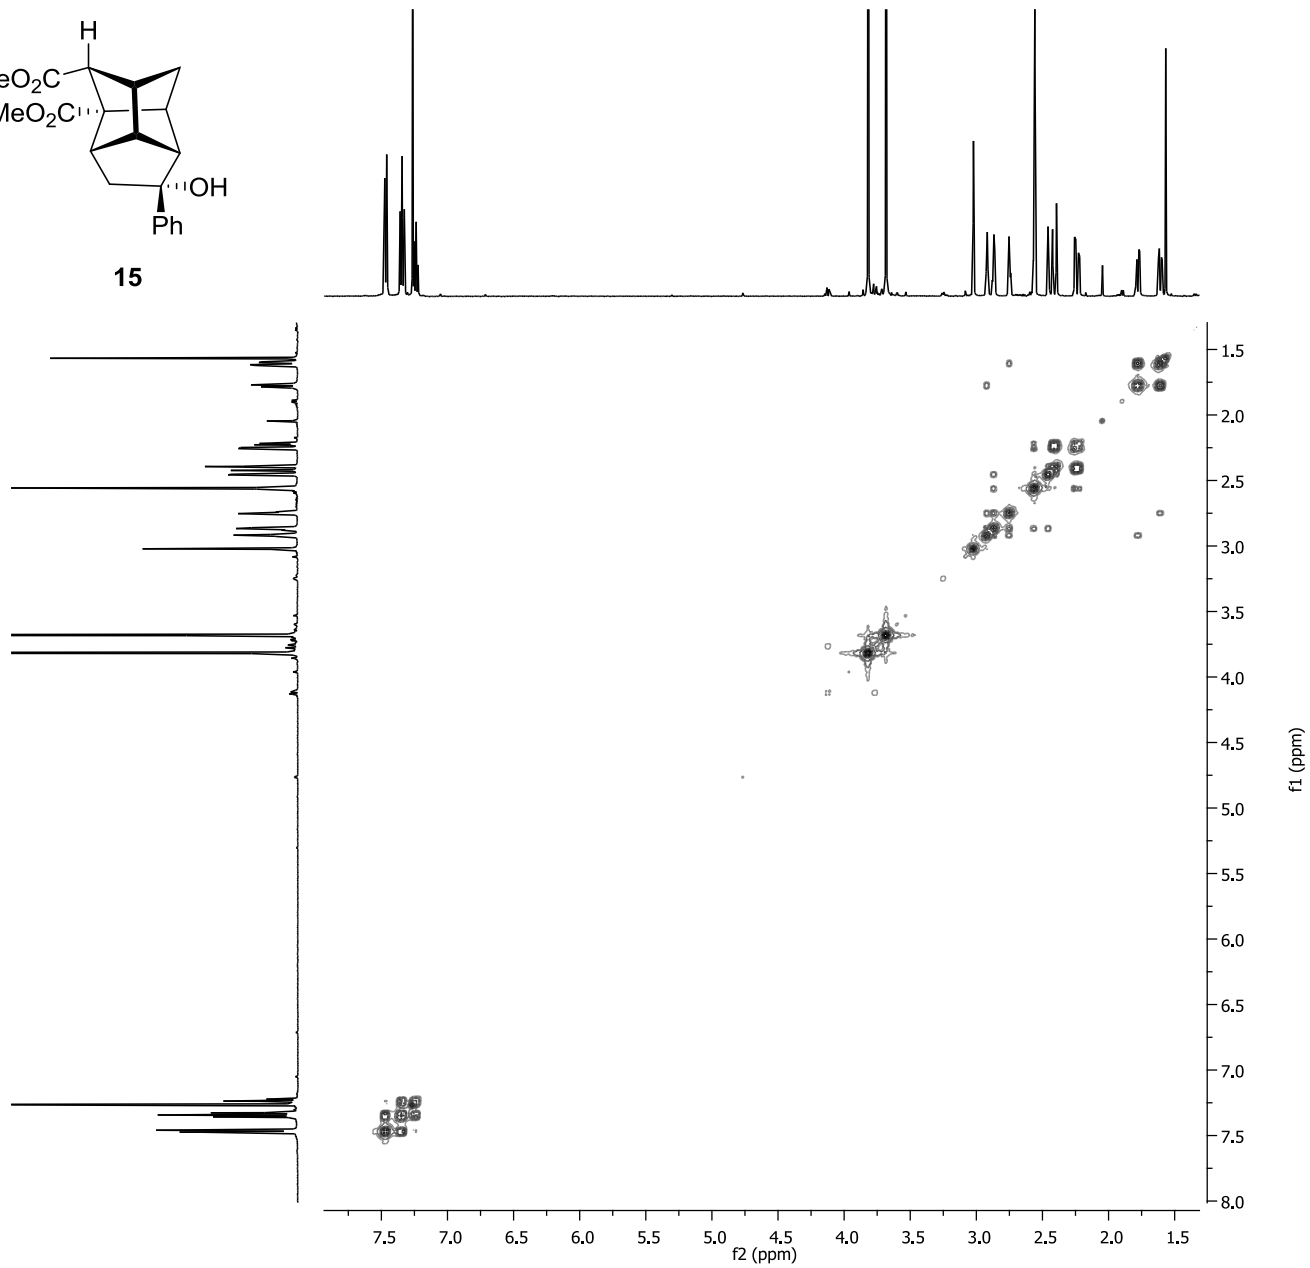

$^1\text{H}$  NMR (500 MHz,  $\text{CDCl}_3$ ):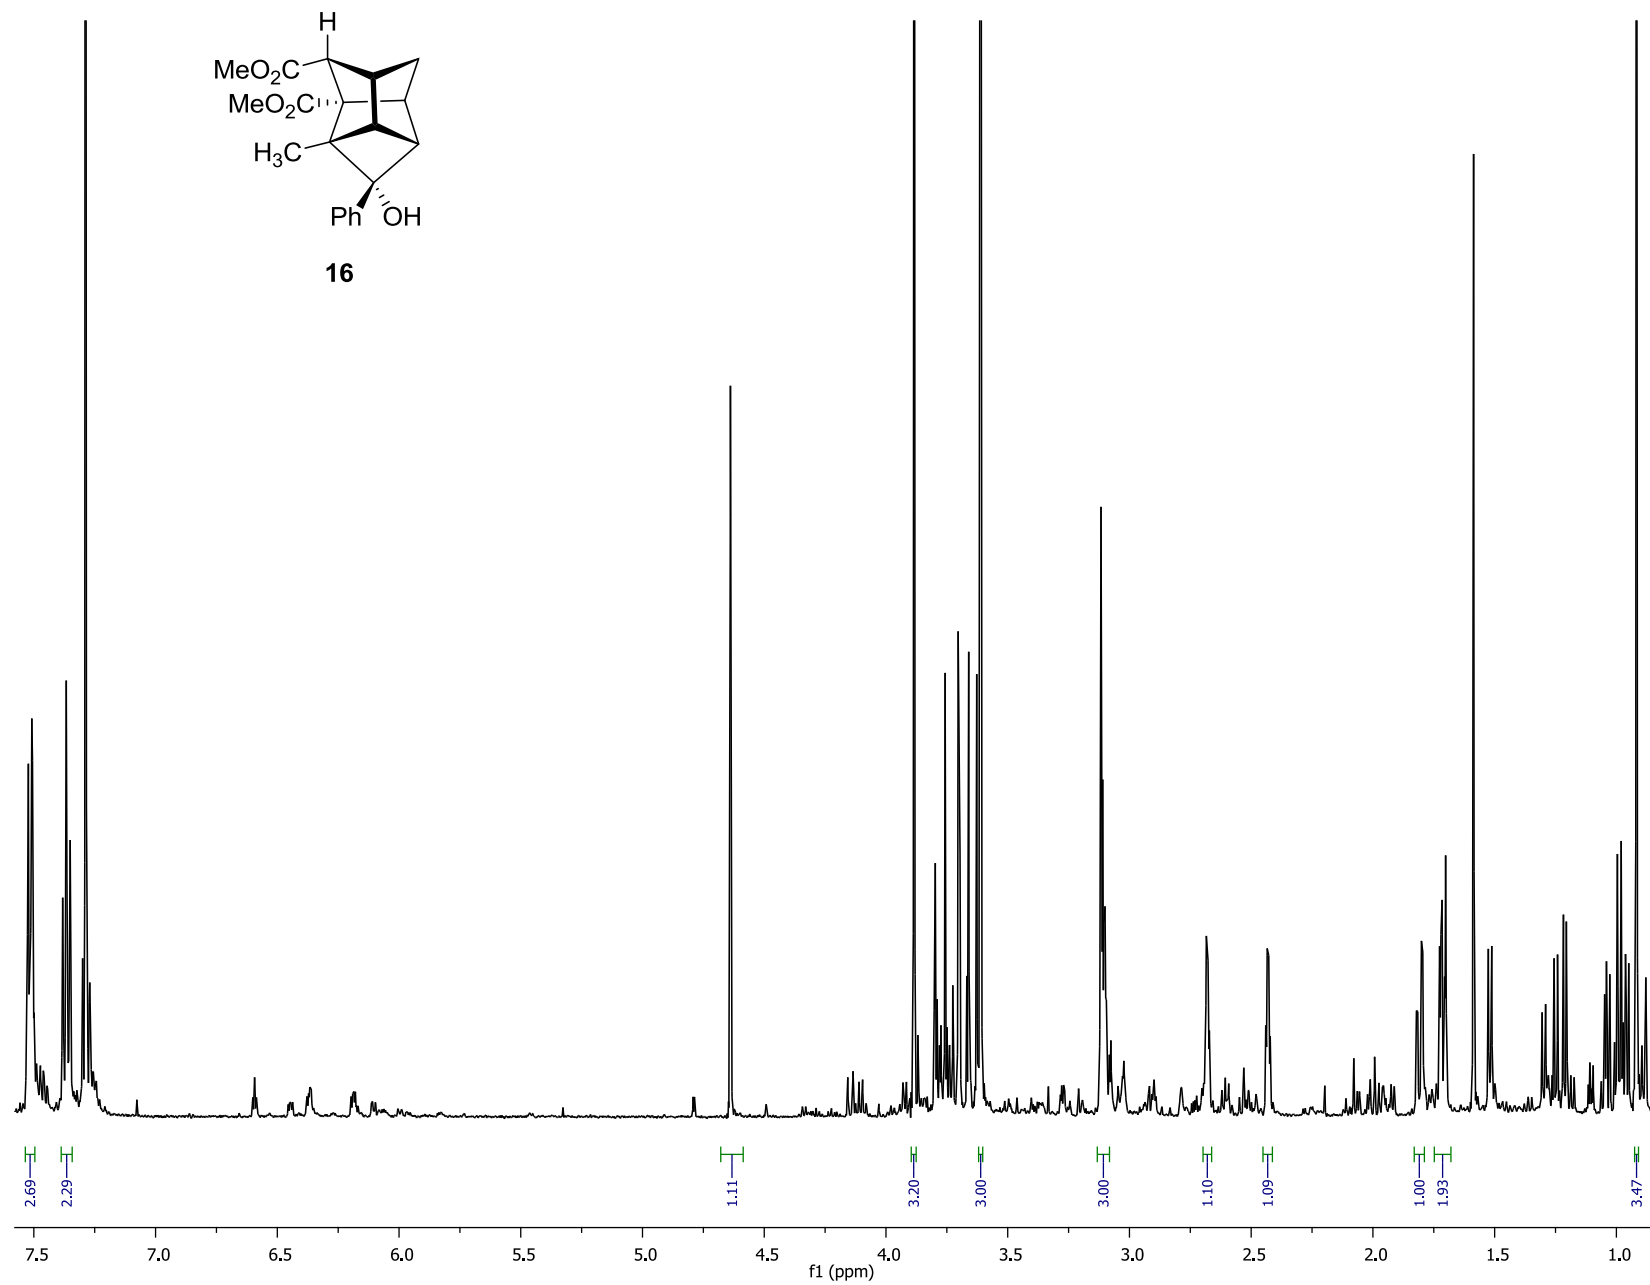

$^1\text{H}$  NMR (500 MHz,  $\text{CDCl}_3$ ):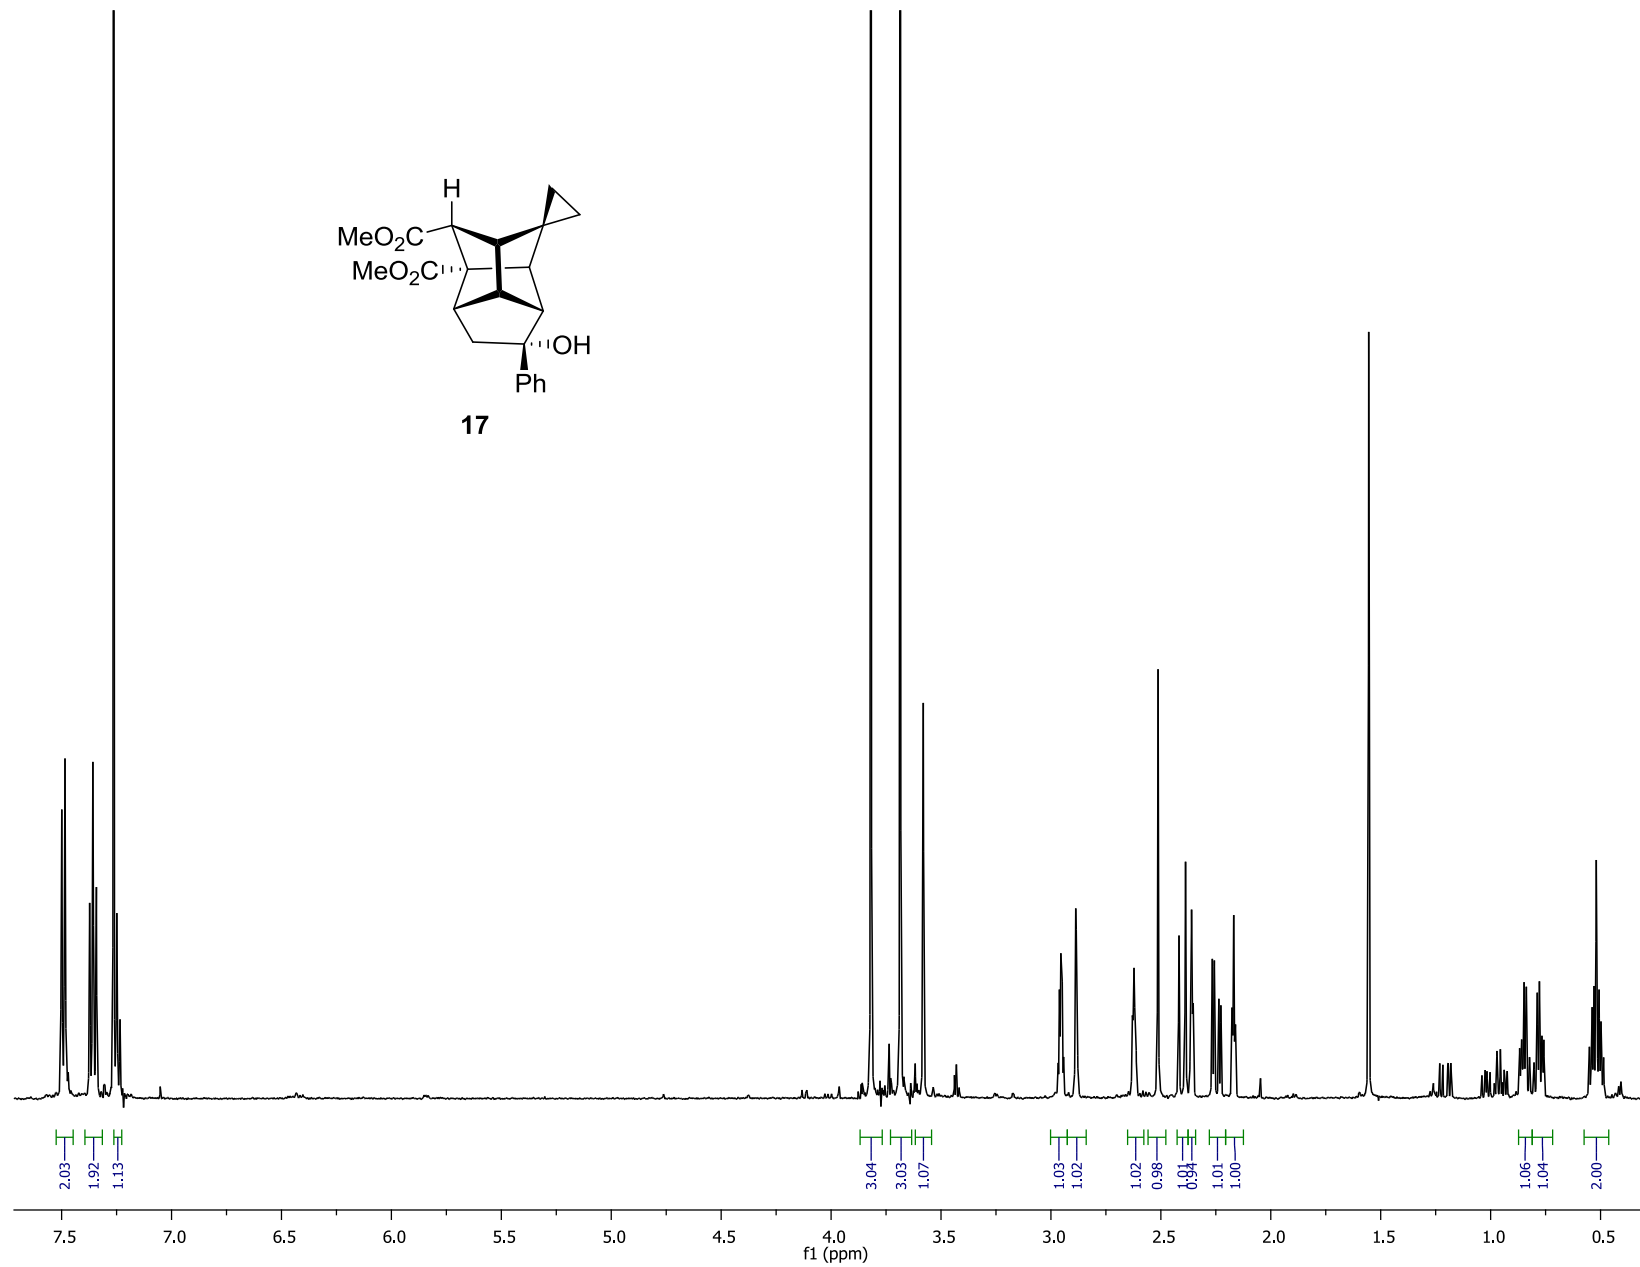

$^1\text{H}$  NMR (500 MHz,  $\text{C}_6\text{D}_6$ ):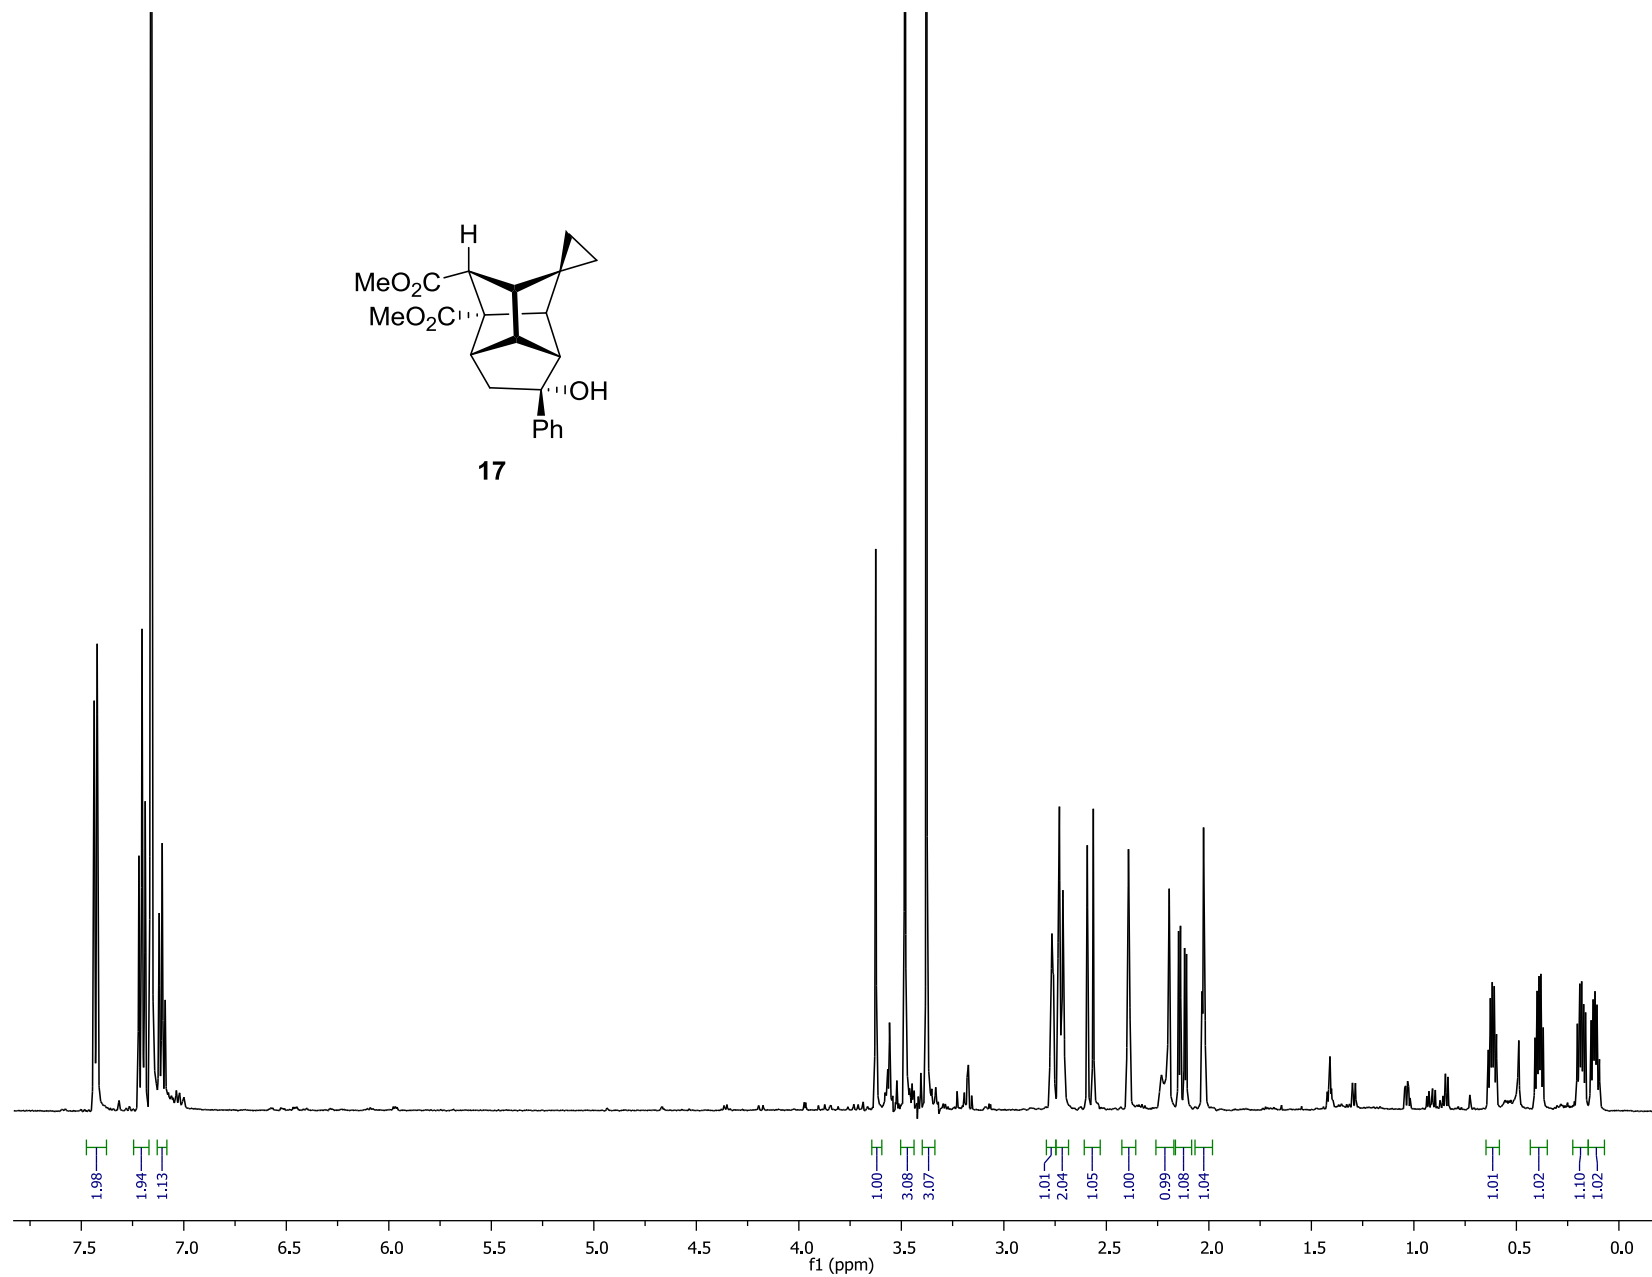

$^1\text{H}$  NMR (500 MHz,  $\text{CD}_3\text{OD}$ ):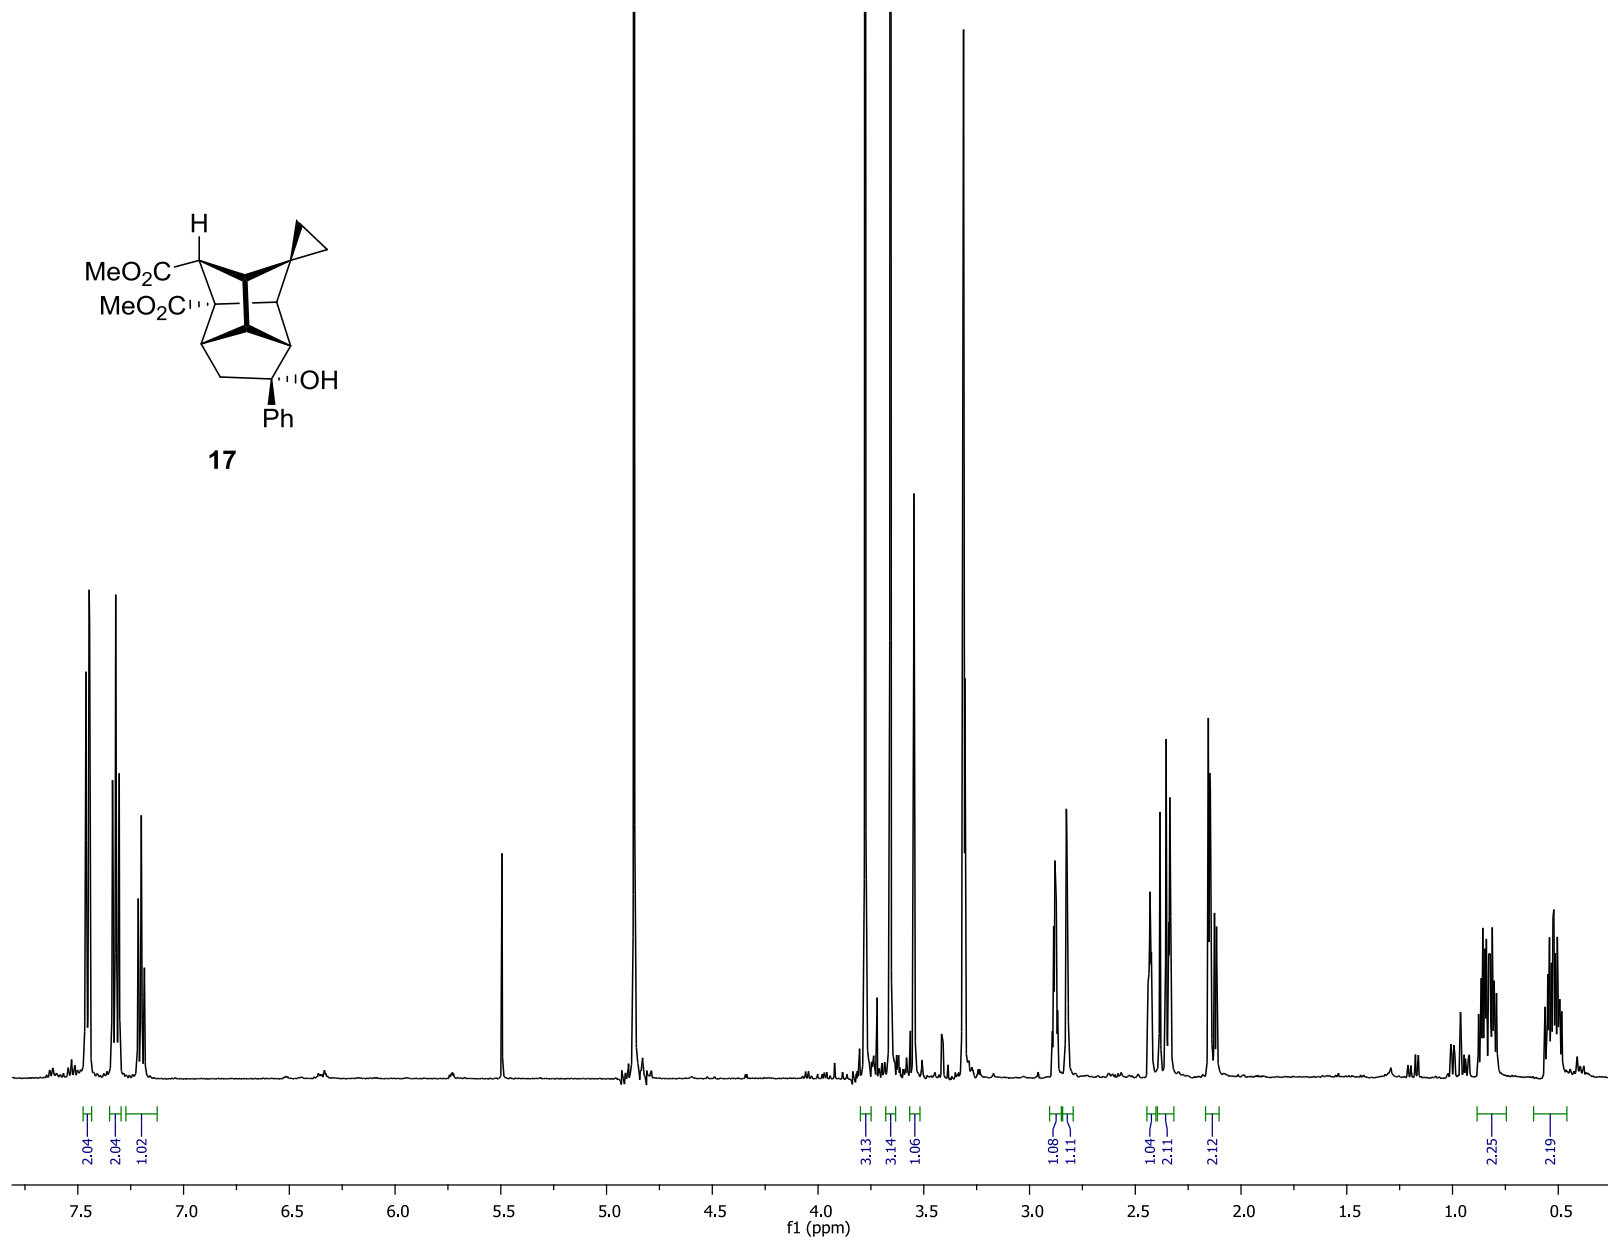



$^{13}\text{C}$  NMR (500 MHz,  $\text{CDCl}_3$ ):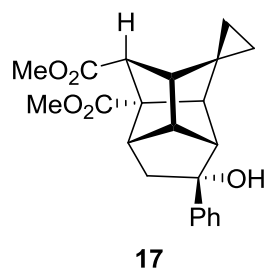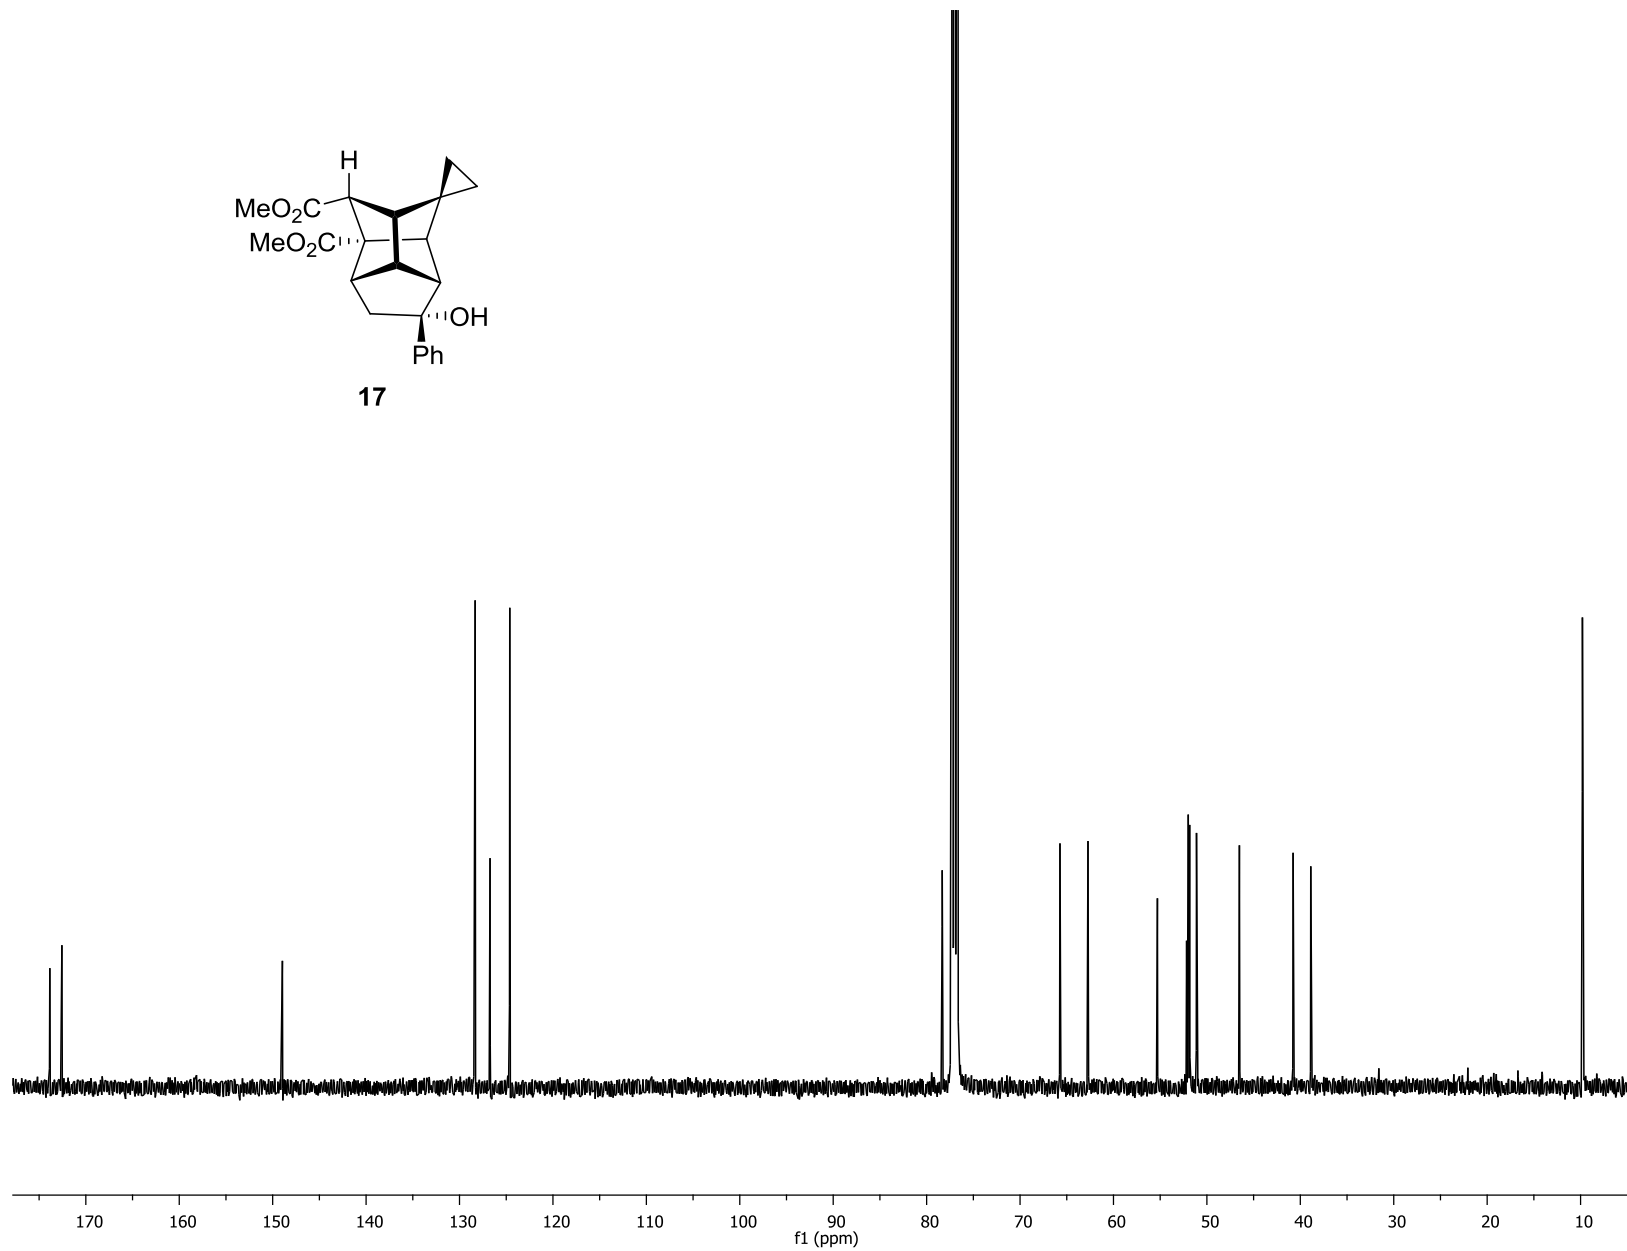

$^{13}\text{C}$  NMR (500 MHz,  $\text{CD}_3\text{OD}$ ):

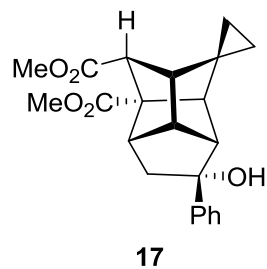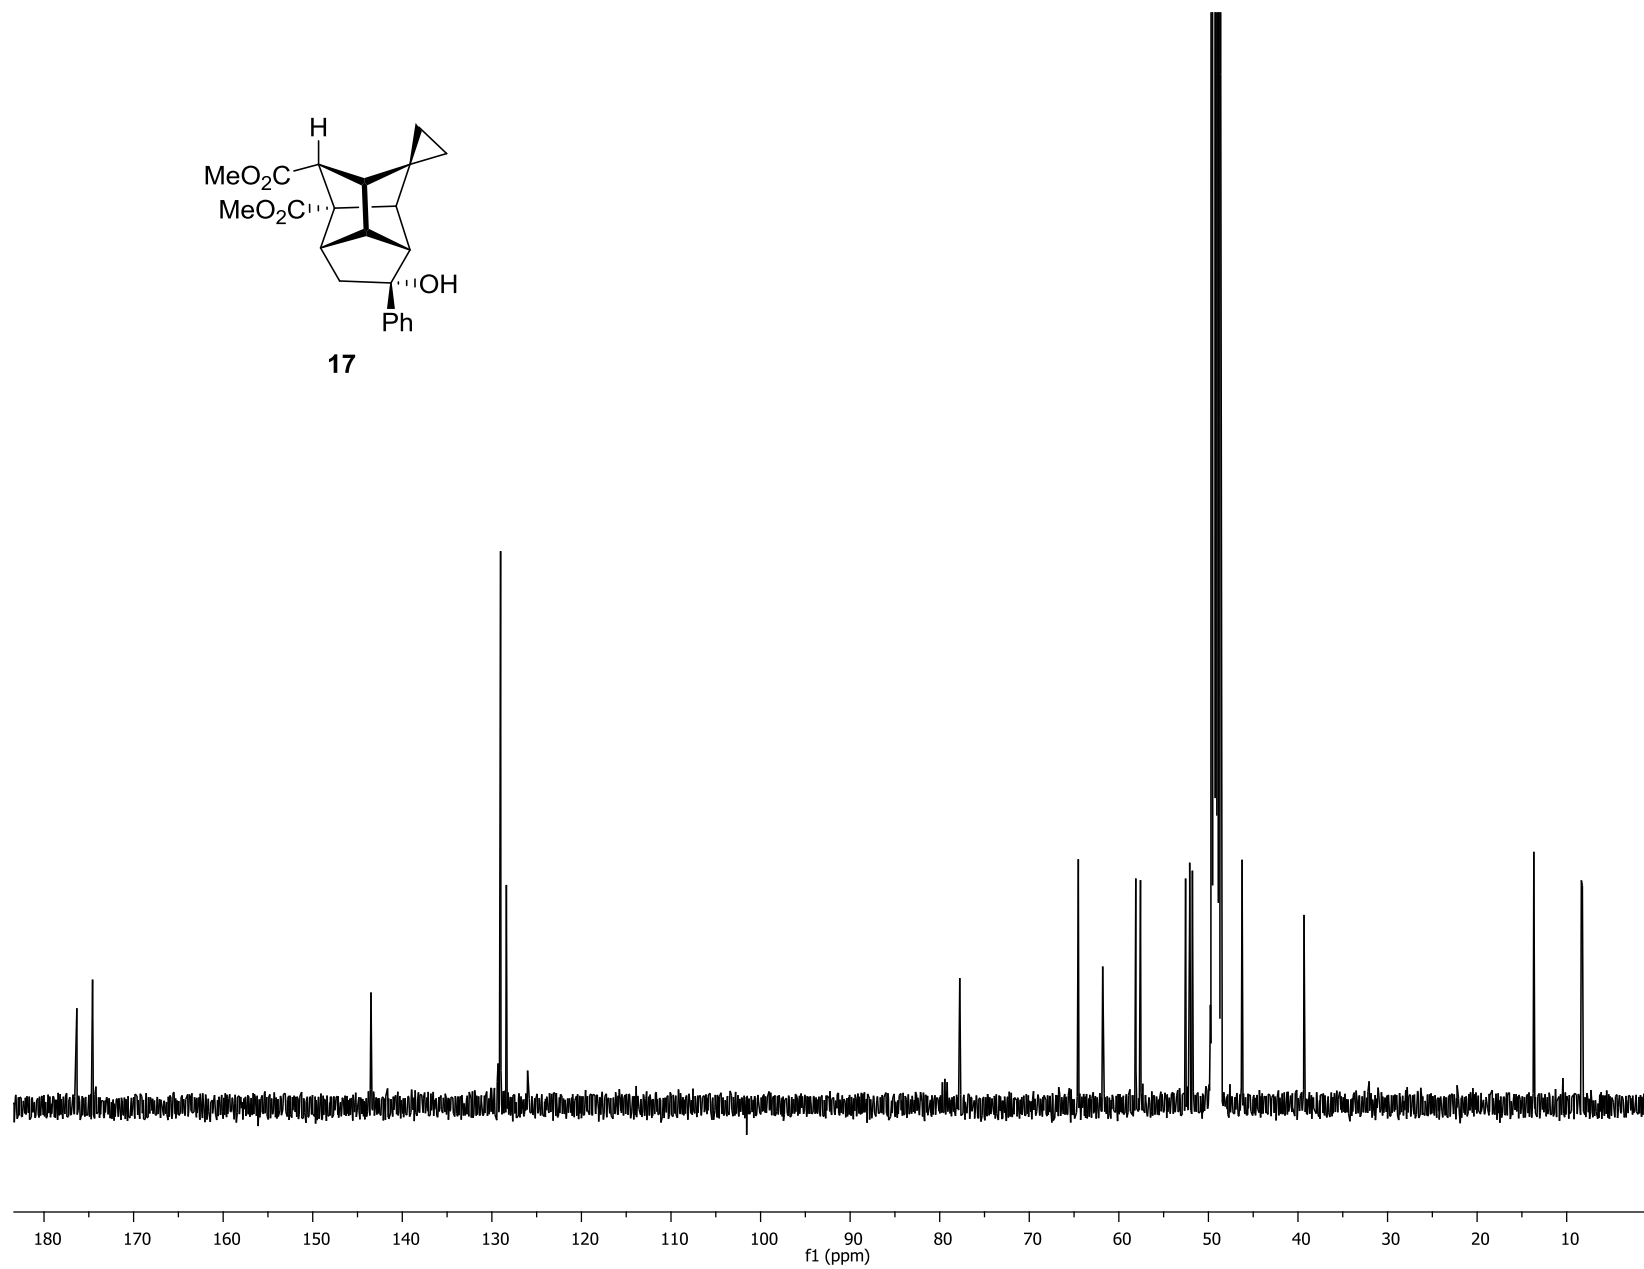

COSY (500 MHz, CDCl<sub>3</sub>):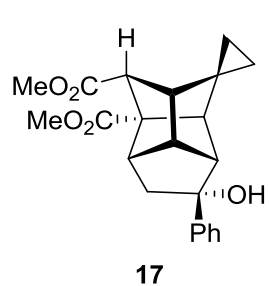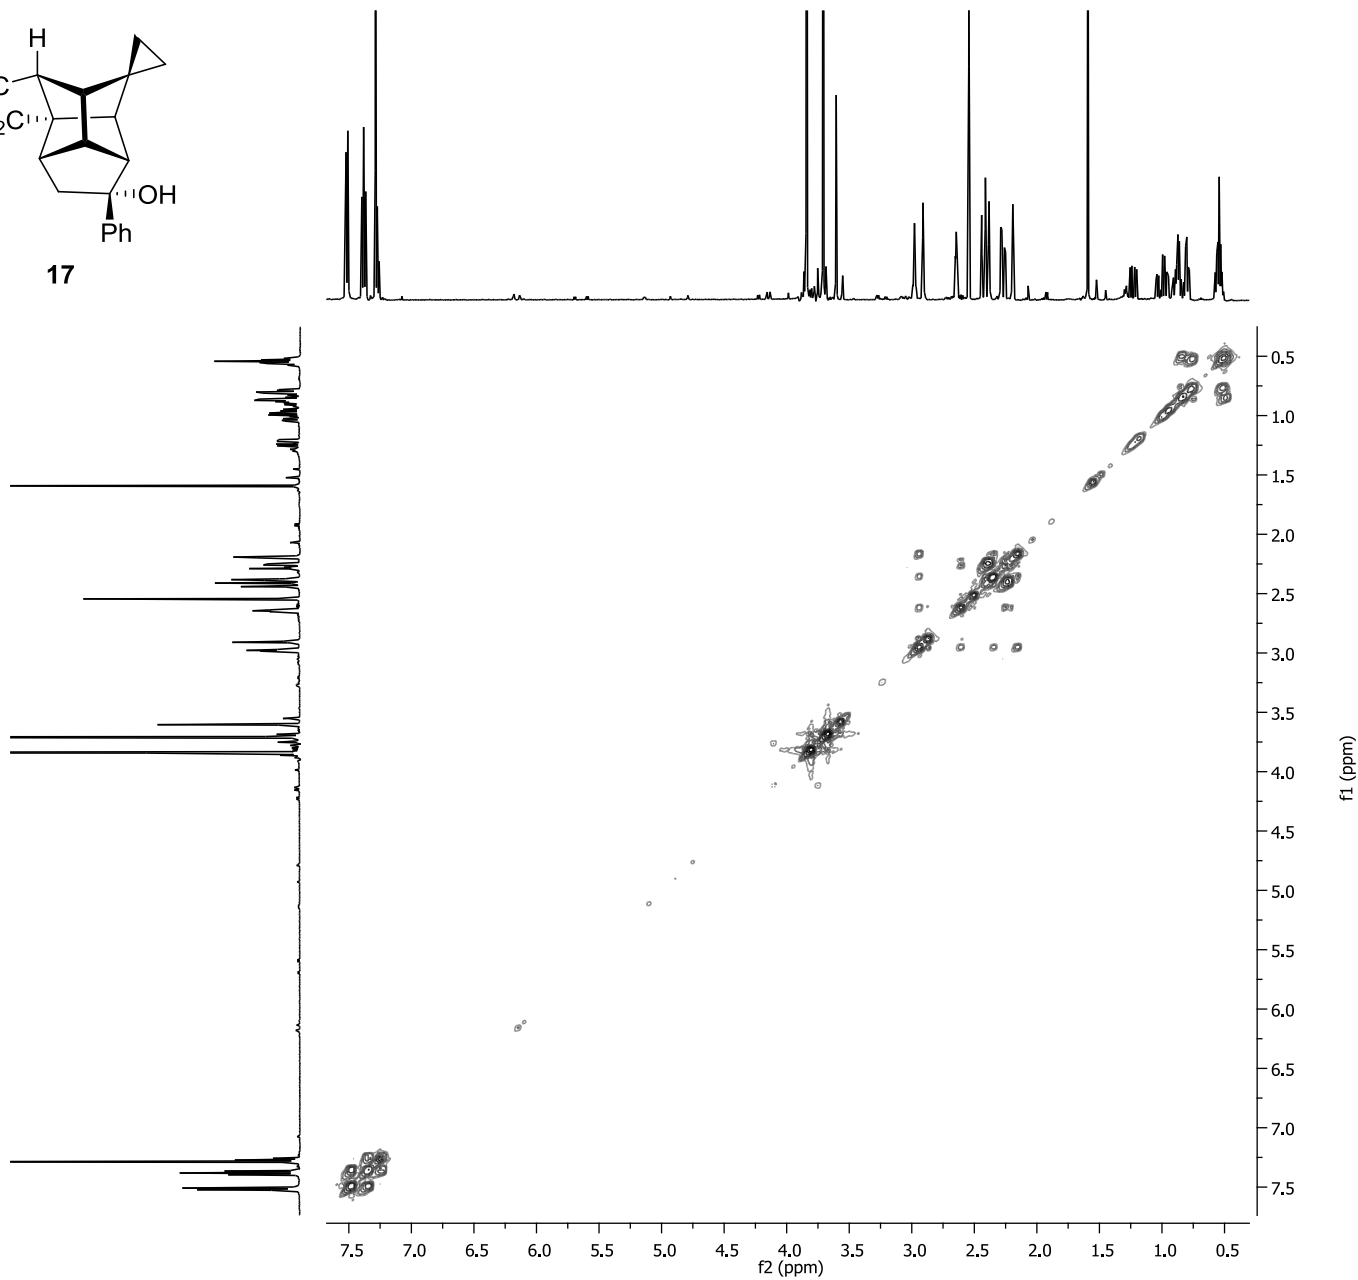

COSY (500 MHz,  $C_6D_6$ ):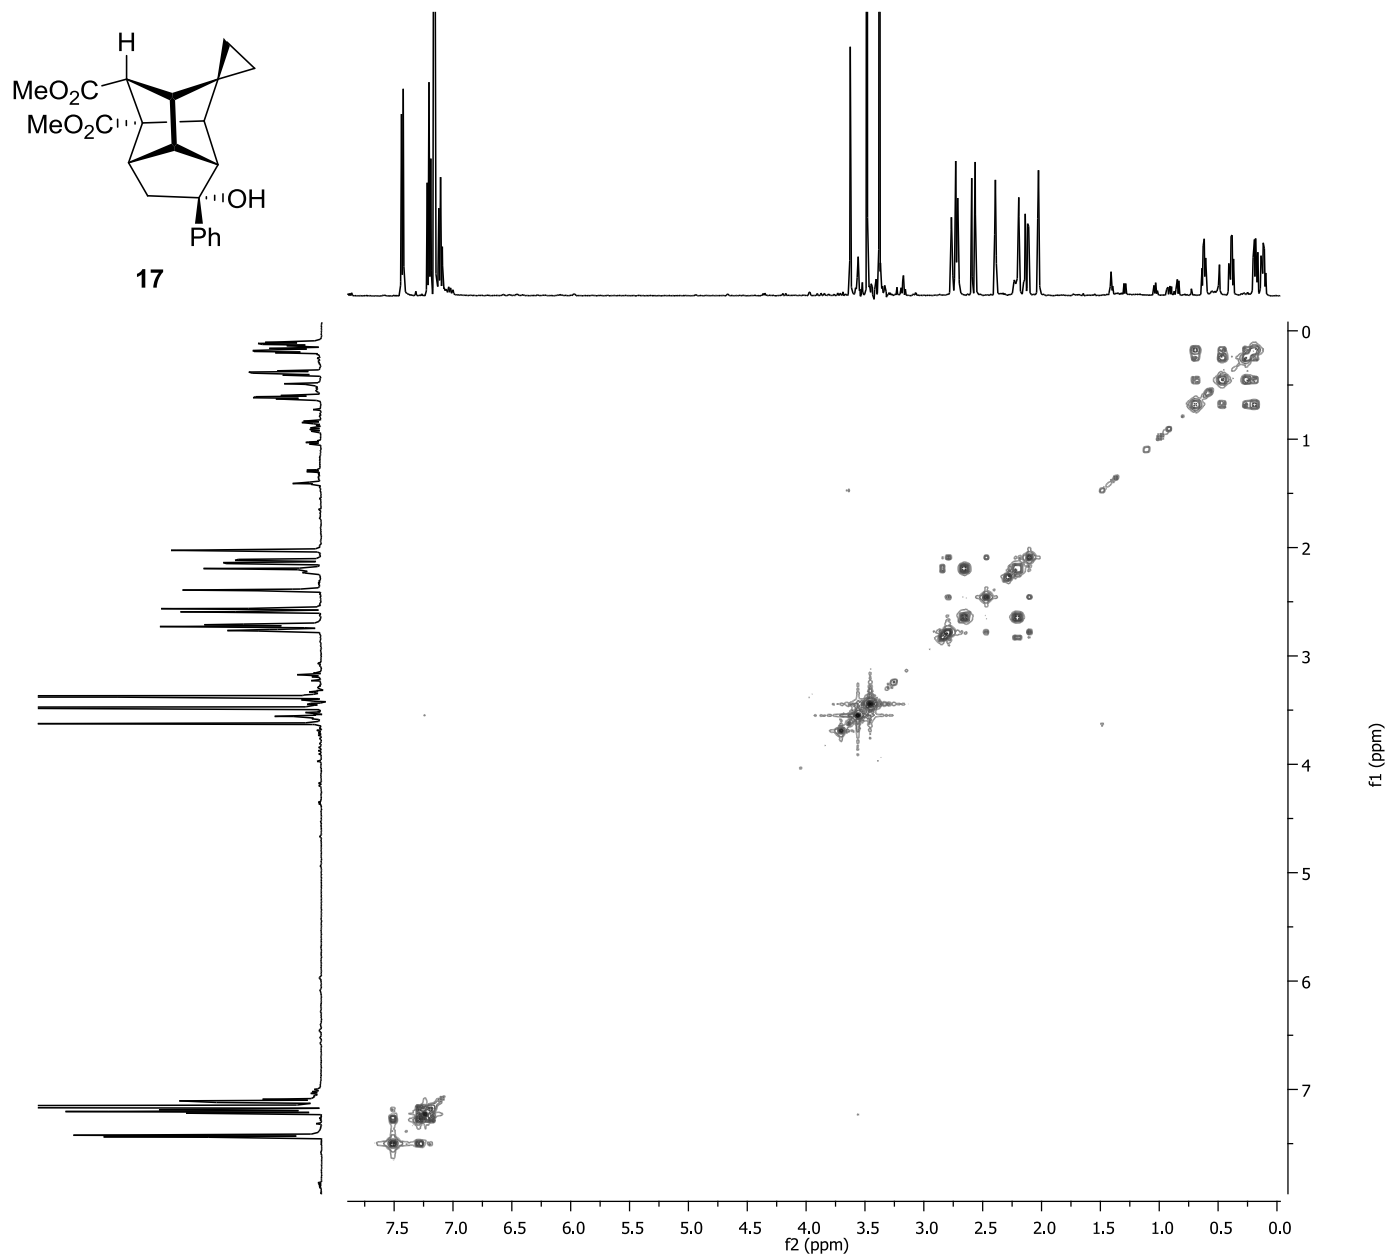

$^1\text{H}$  NMR (500 MHz,  $\text{CDCl}_3$ ):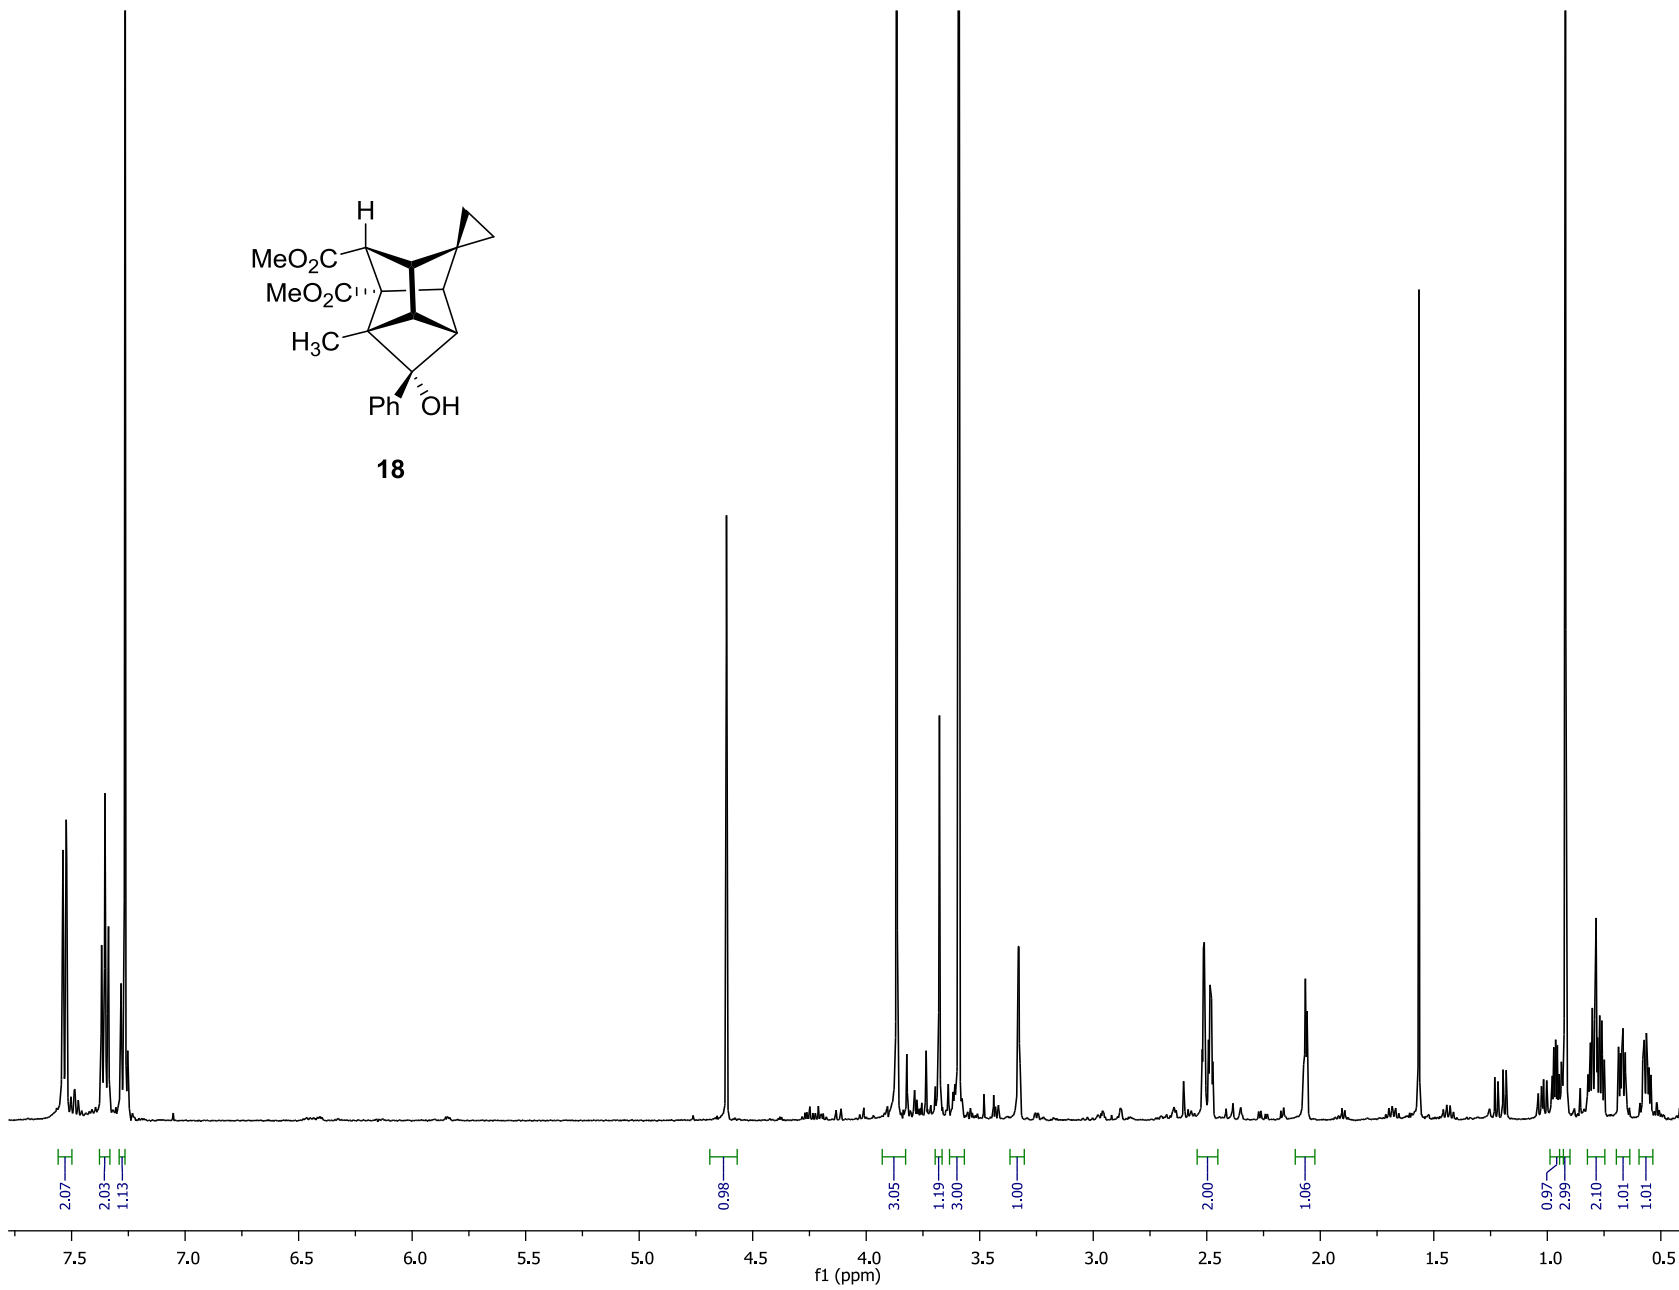

$^{13}\text{C}$  NMR (500 MHz,  $\text{CDCl}_3$ ):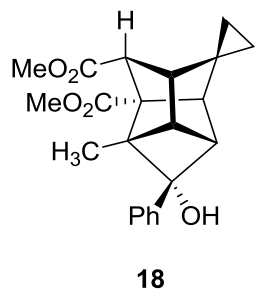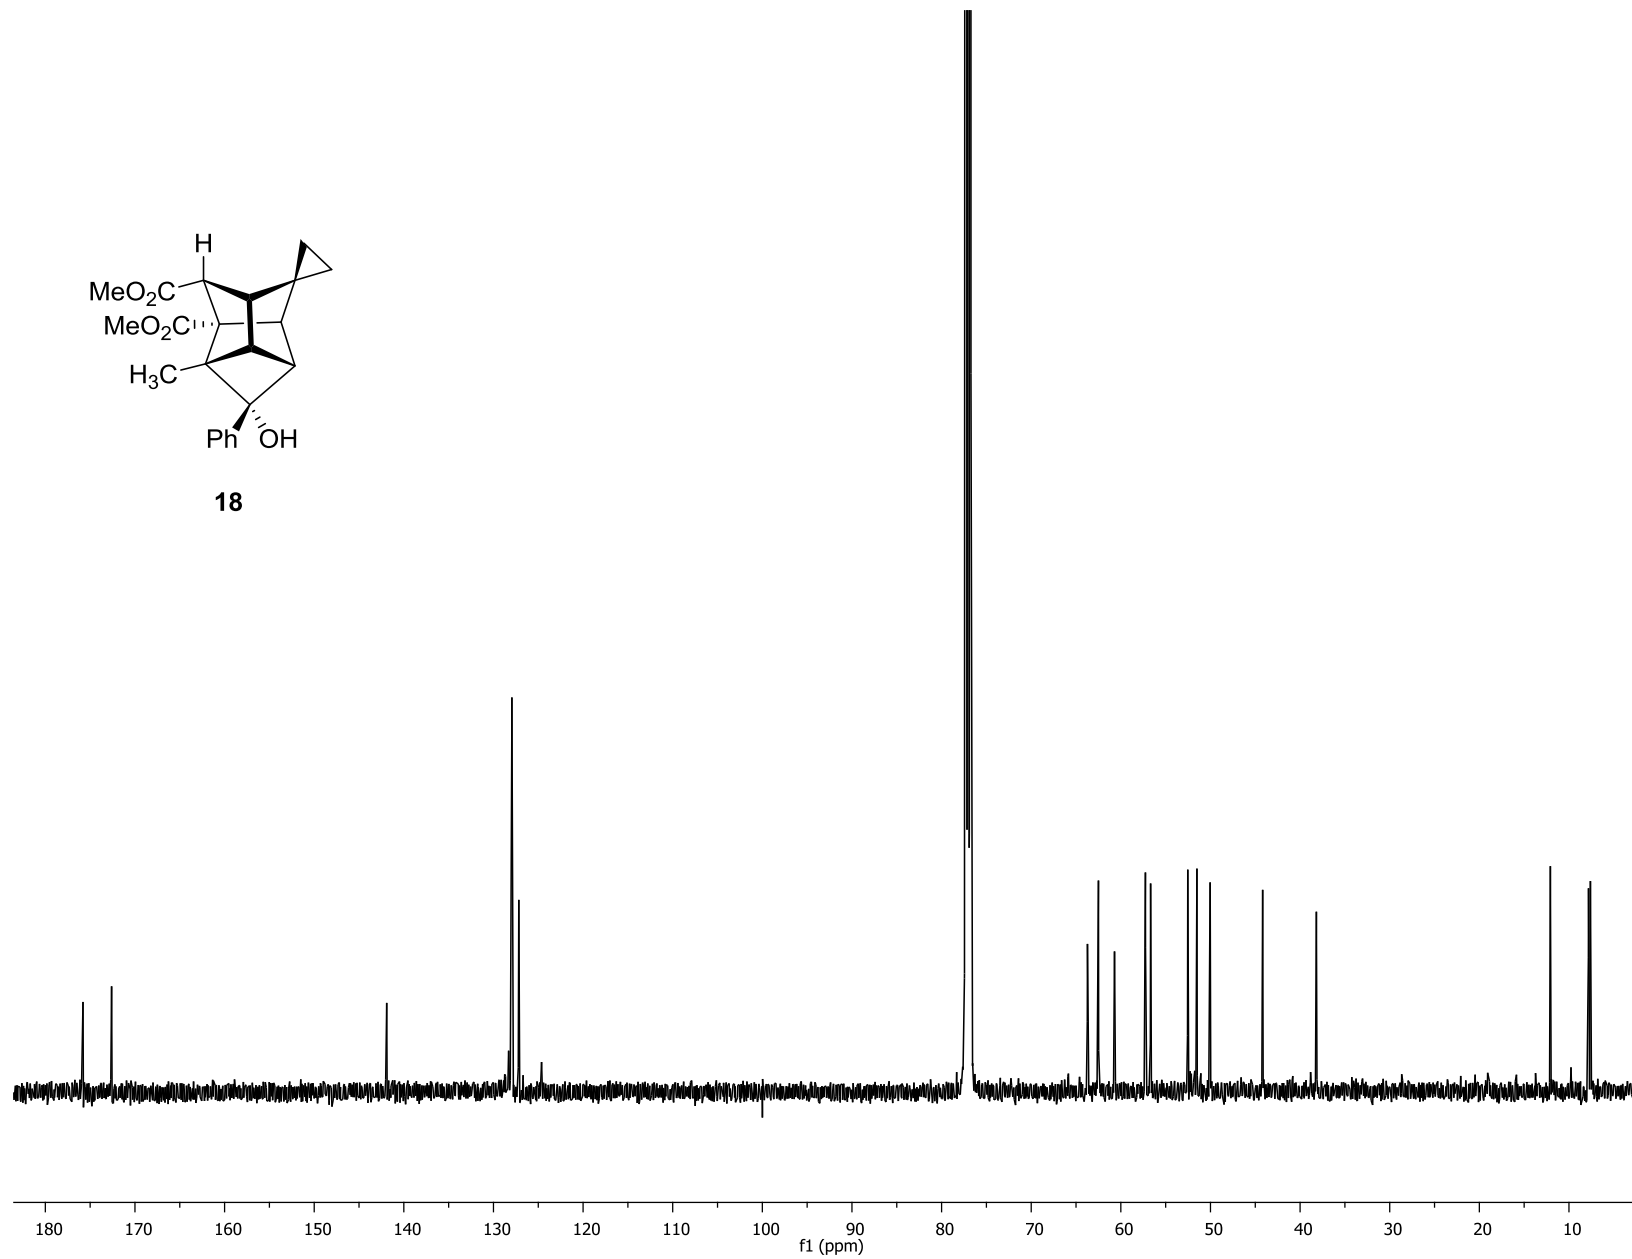

COSY (500 MHz, CDCl<sub>3</sub>):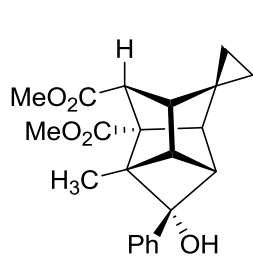**18**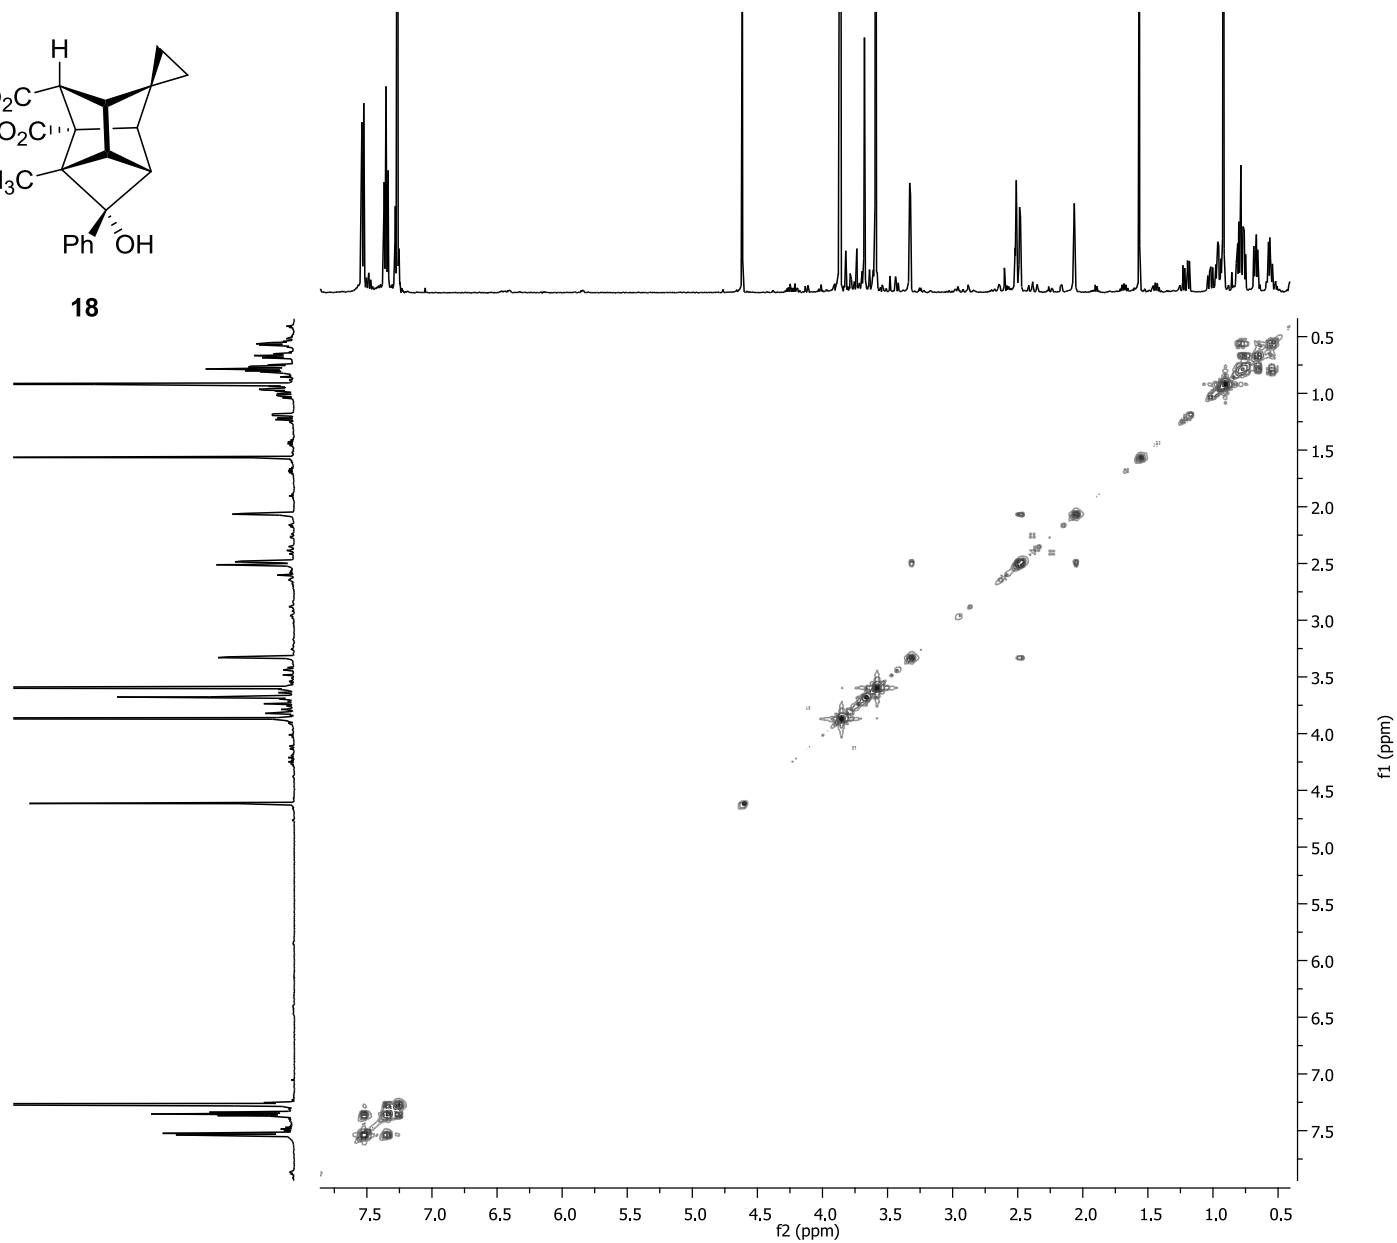

$^1\text{H}$  NMR (500 MHz,  $\text{CDCl}_3$ ):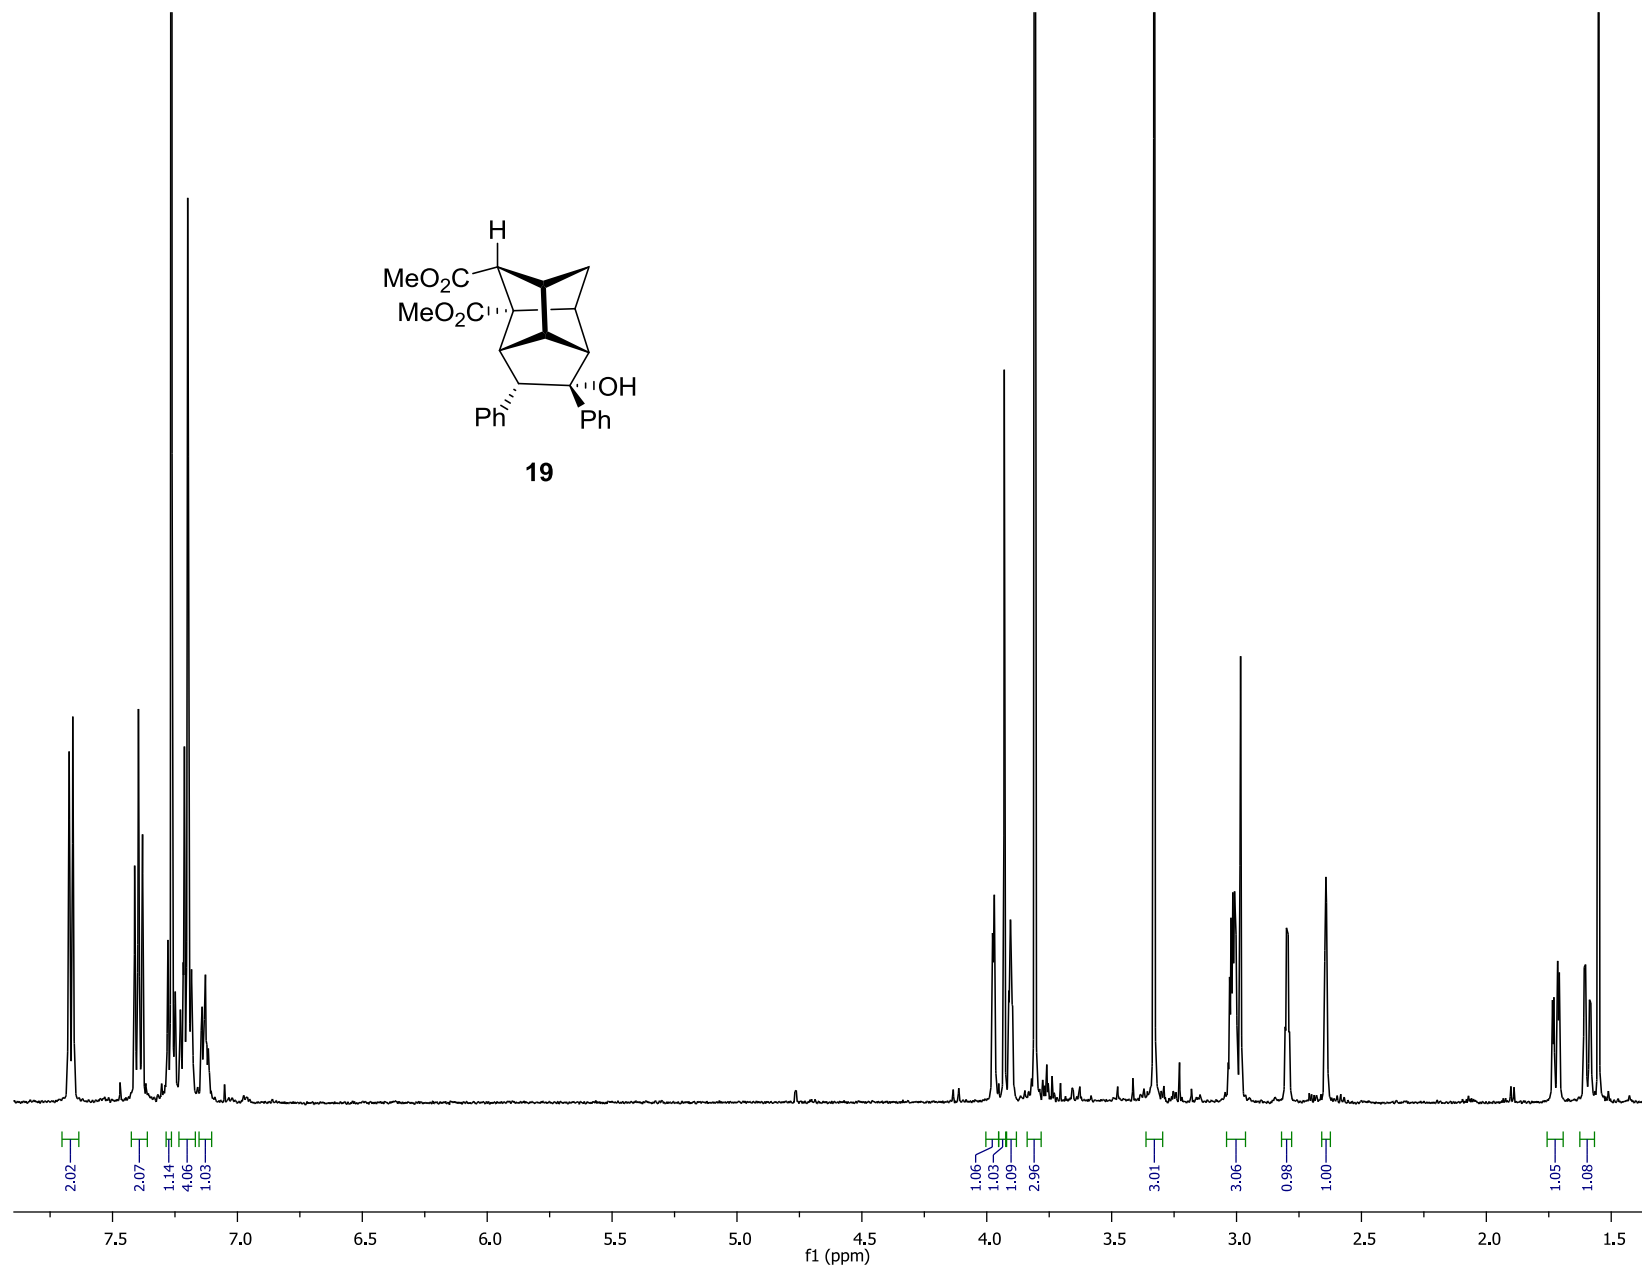



$^{13}\text{C}$  NMR (500 MHz,  $\text{CDCl}_3$ ):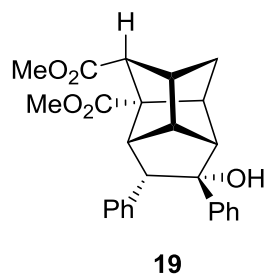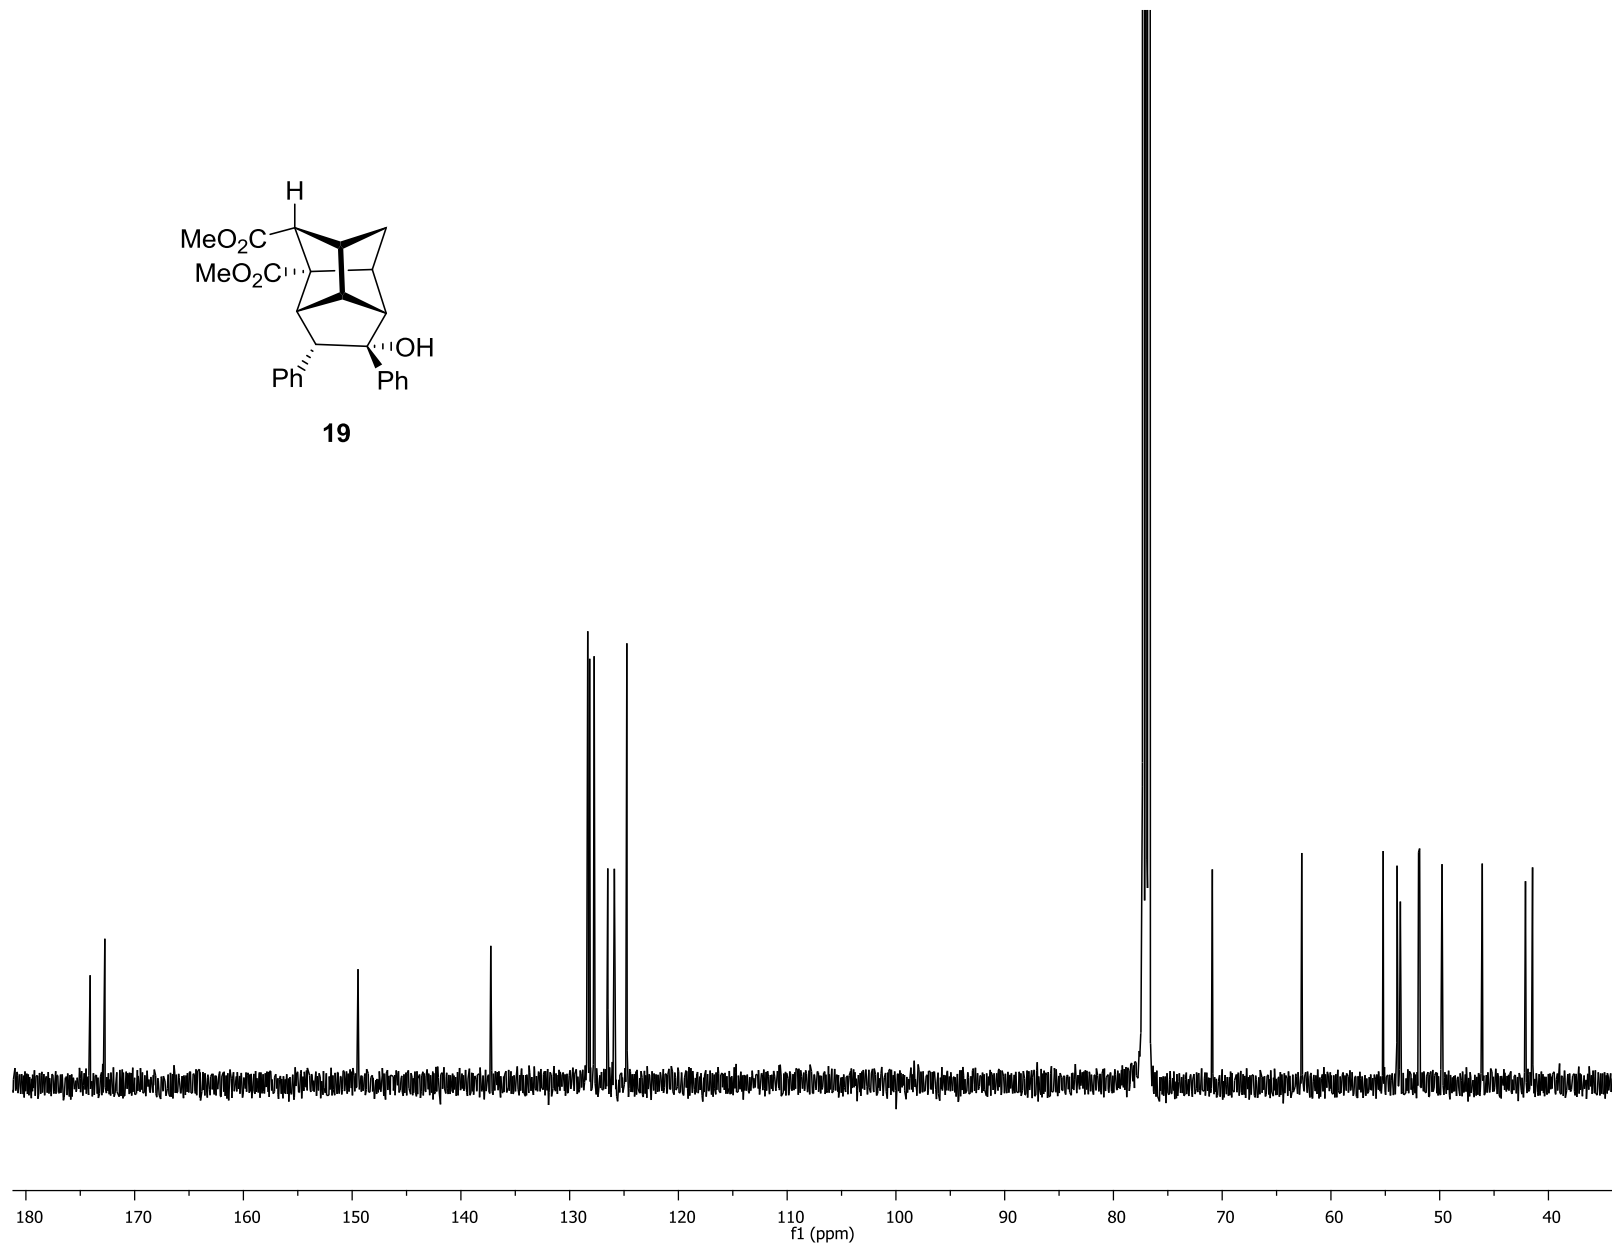

COSY (500 MHz, CDCl<sub>3</sub>):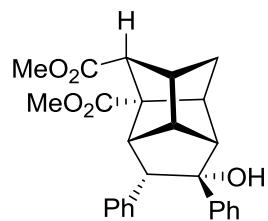**19**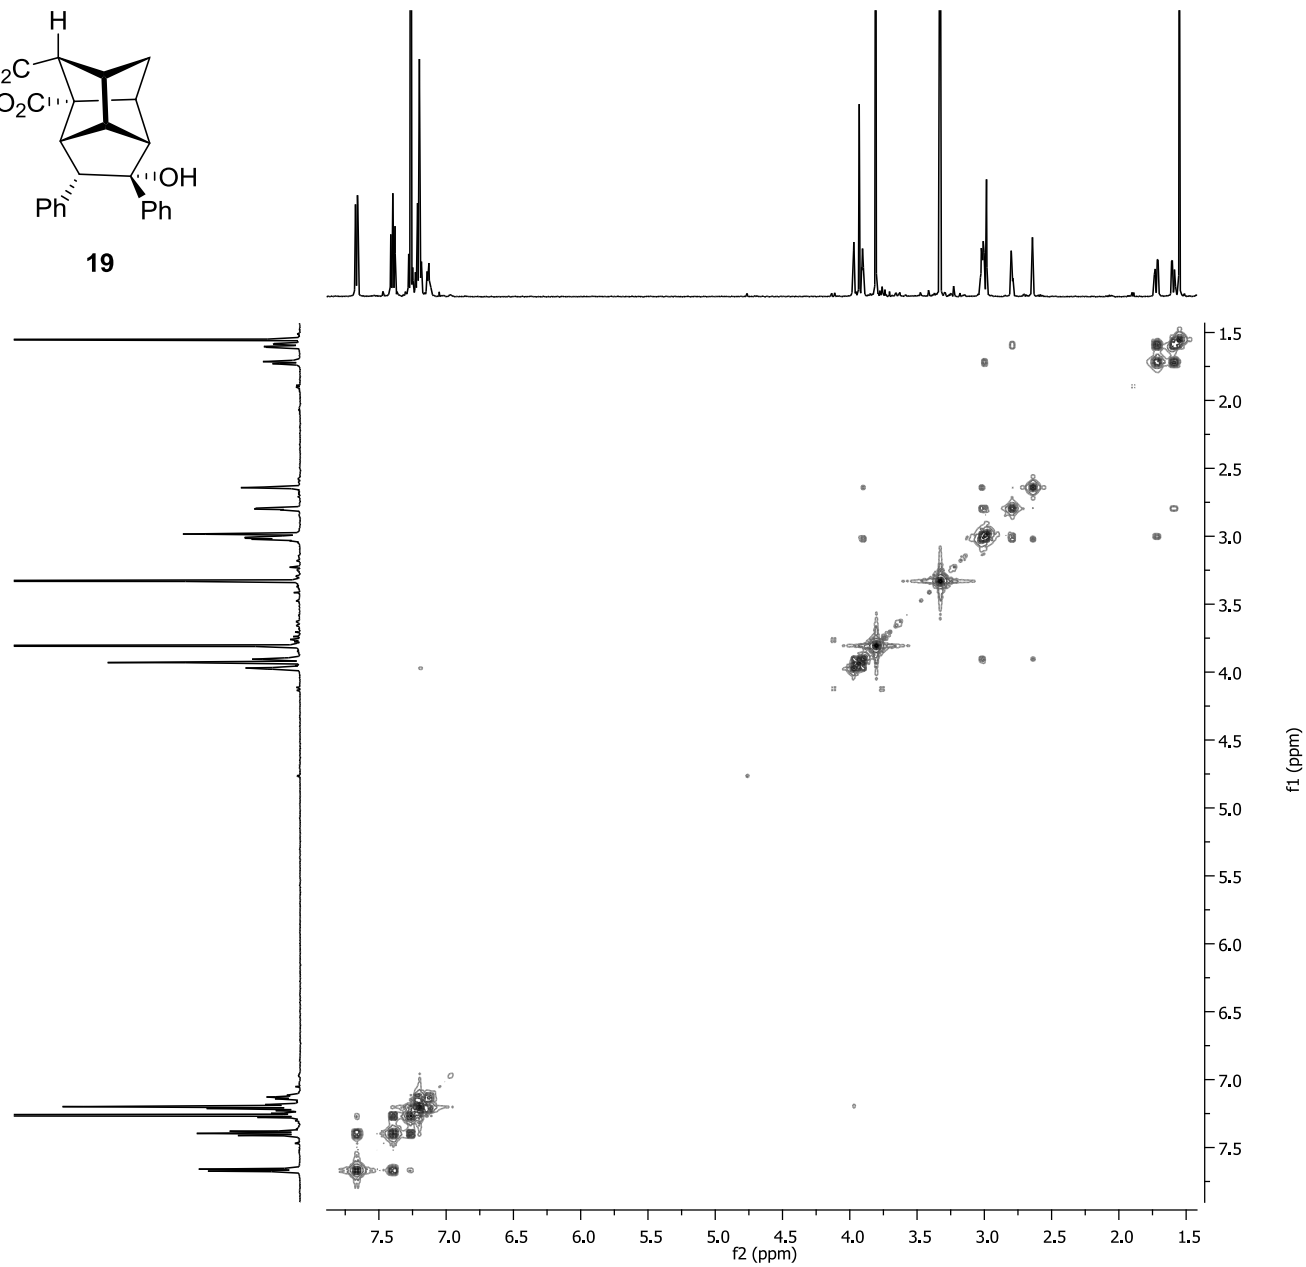

$^1\text{H}$  NMR (500 MHz,  $\text{CDCl}_3$ ):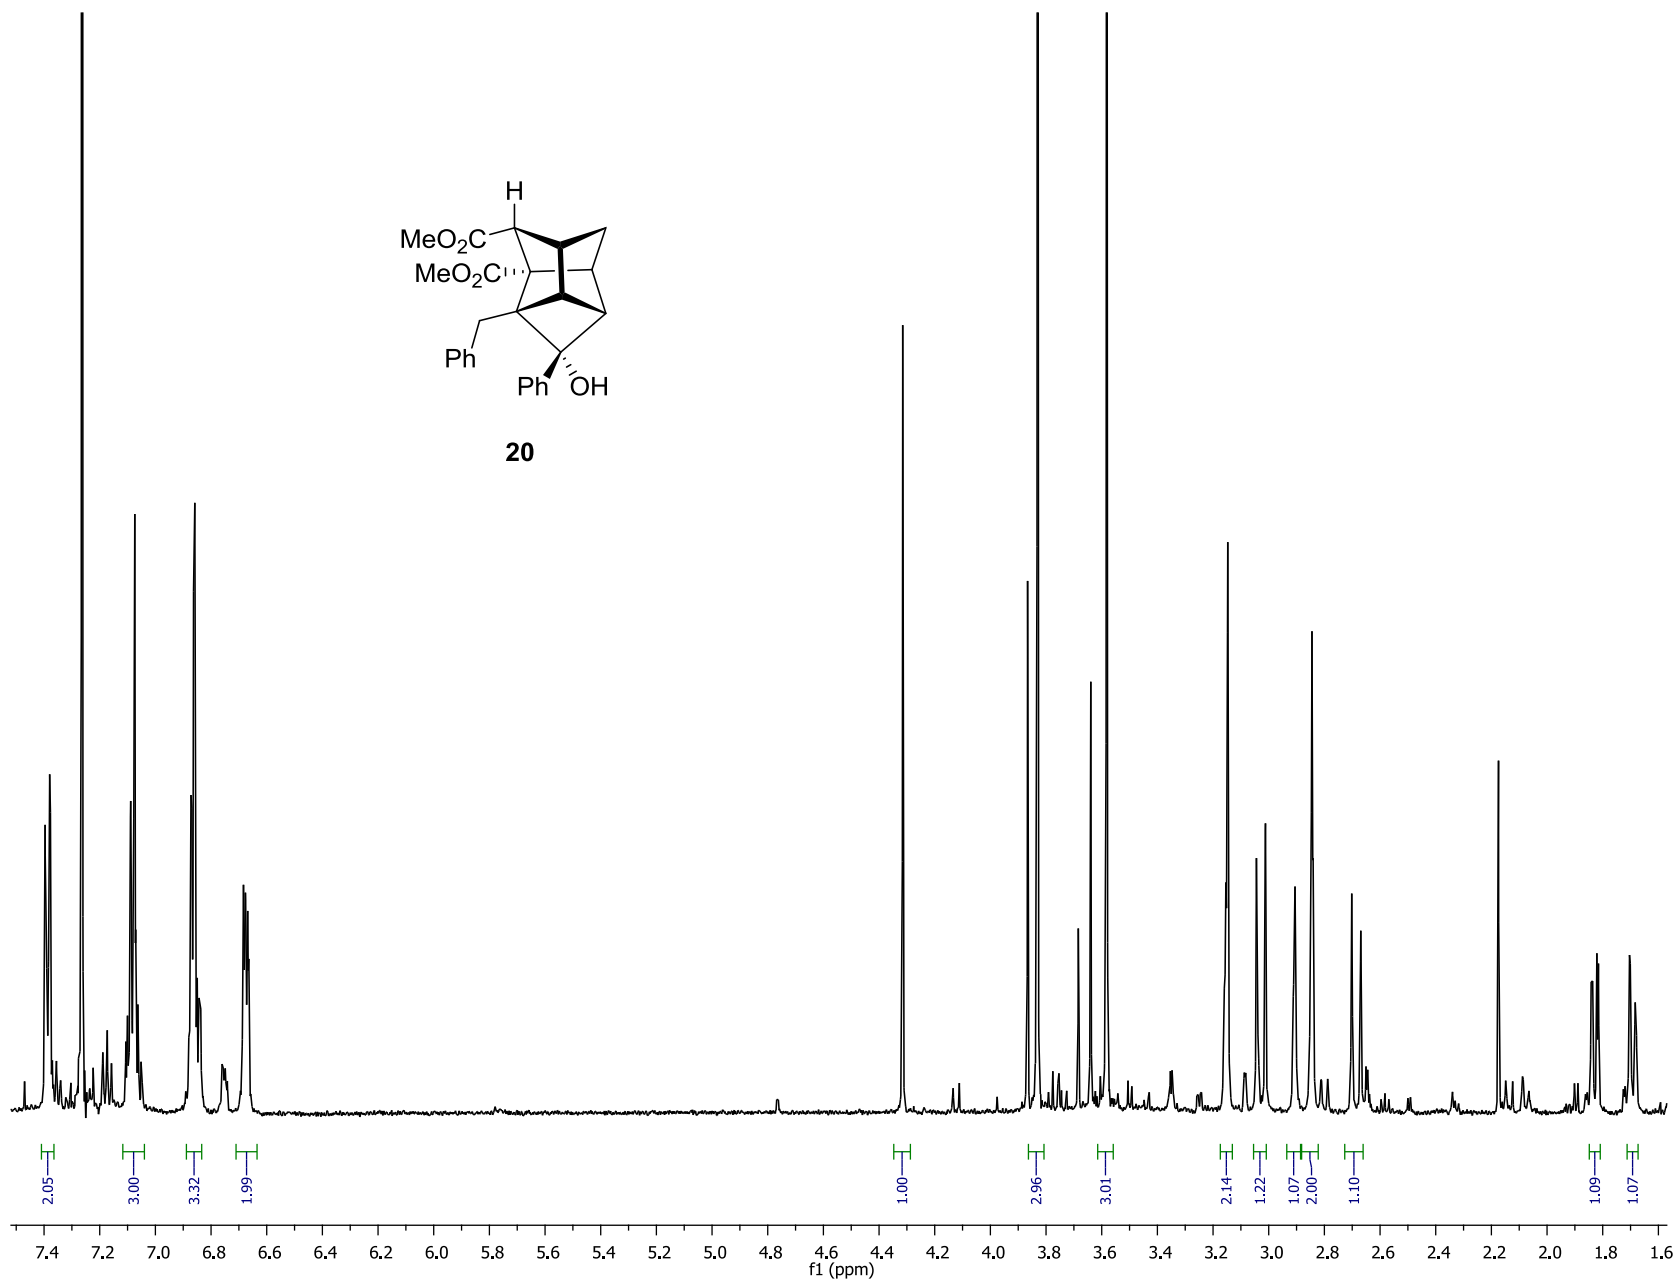

$^{13}\text{C}$  NMR (500 MHz,  $\text{CDCl}_3$ ):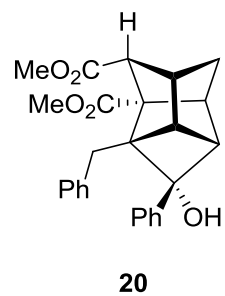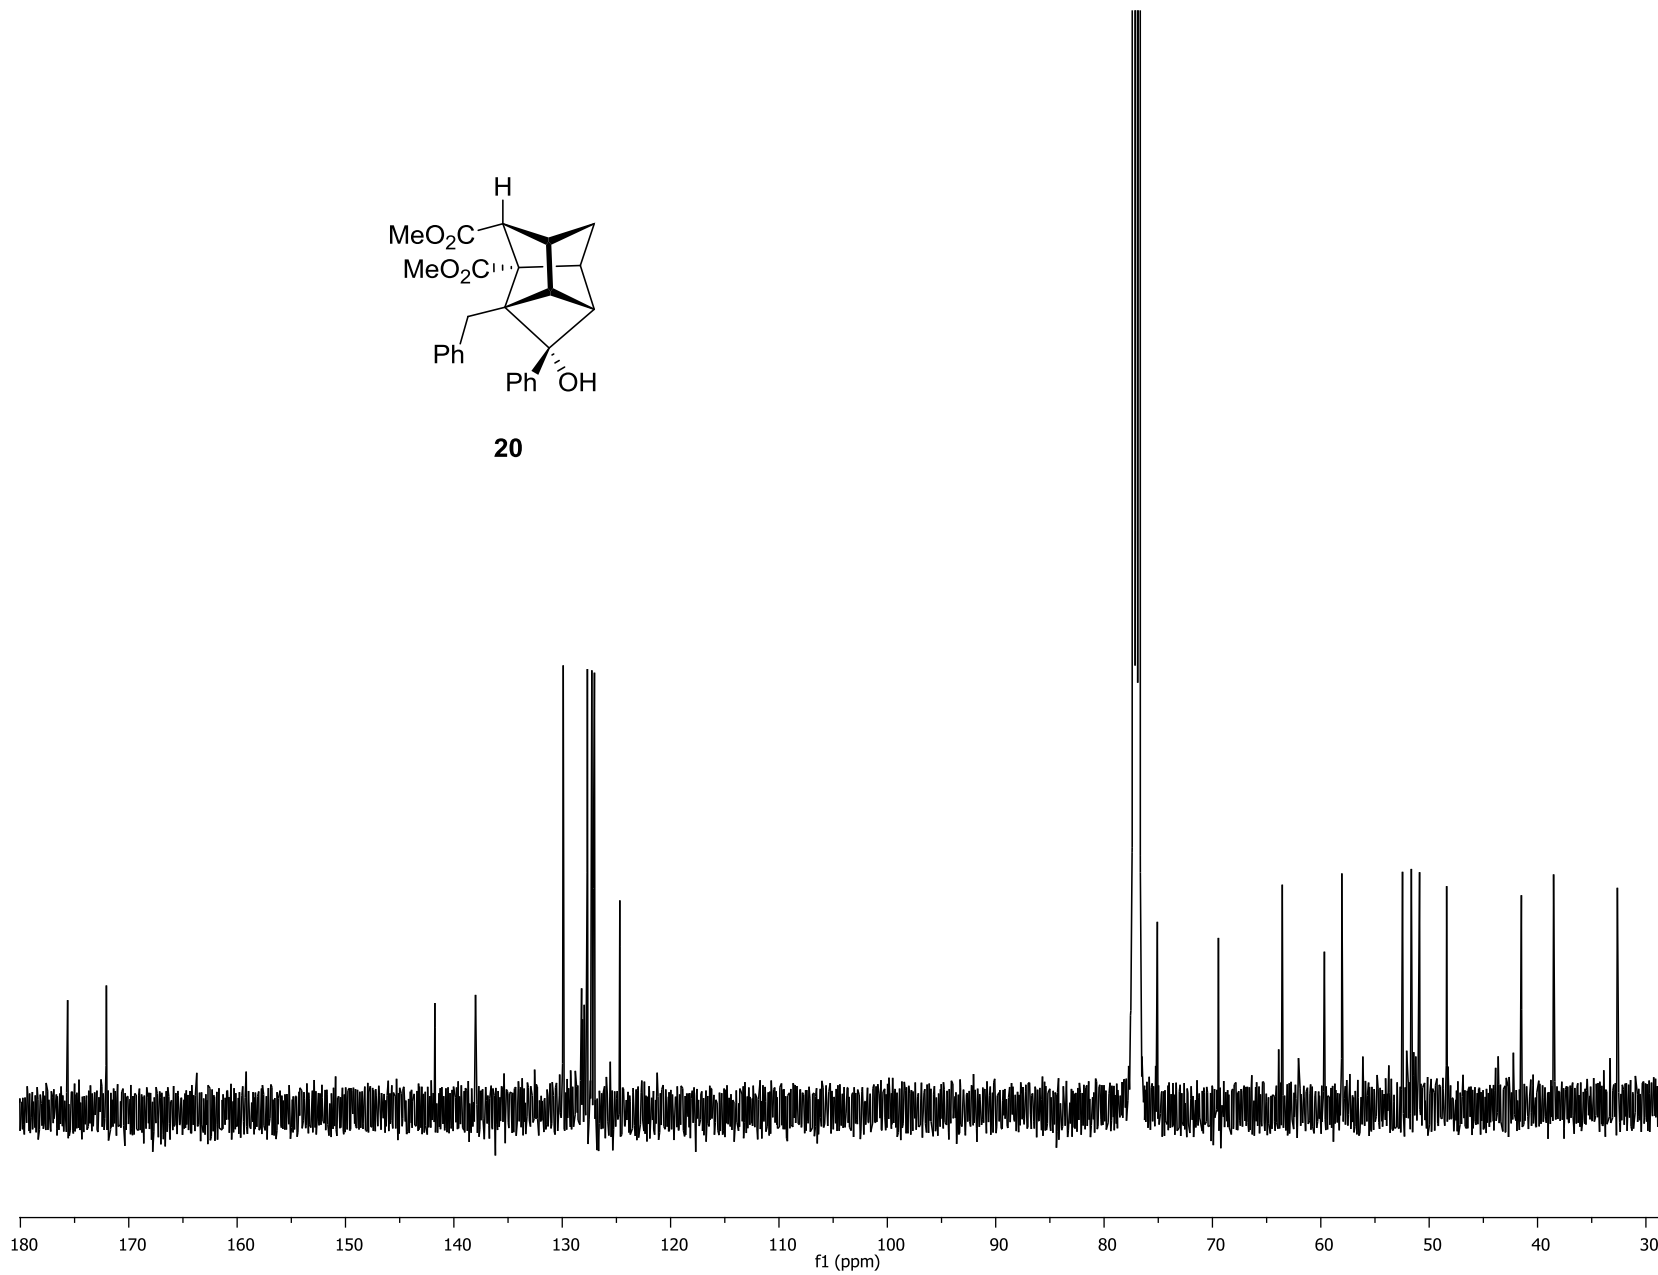

COSY (500 MHz, CDCl<sub>3</sub>):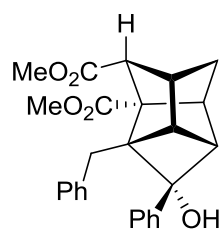**20**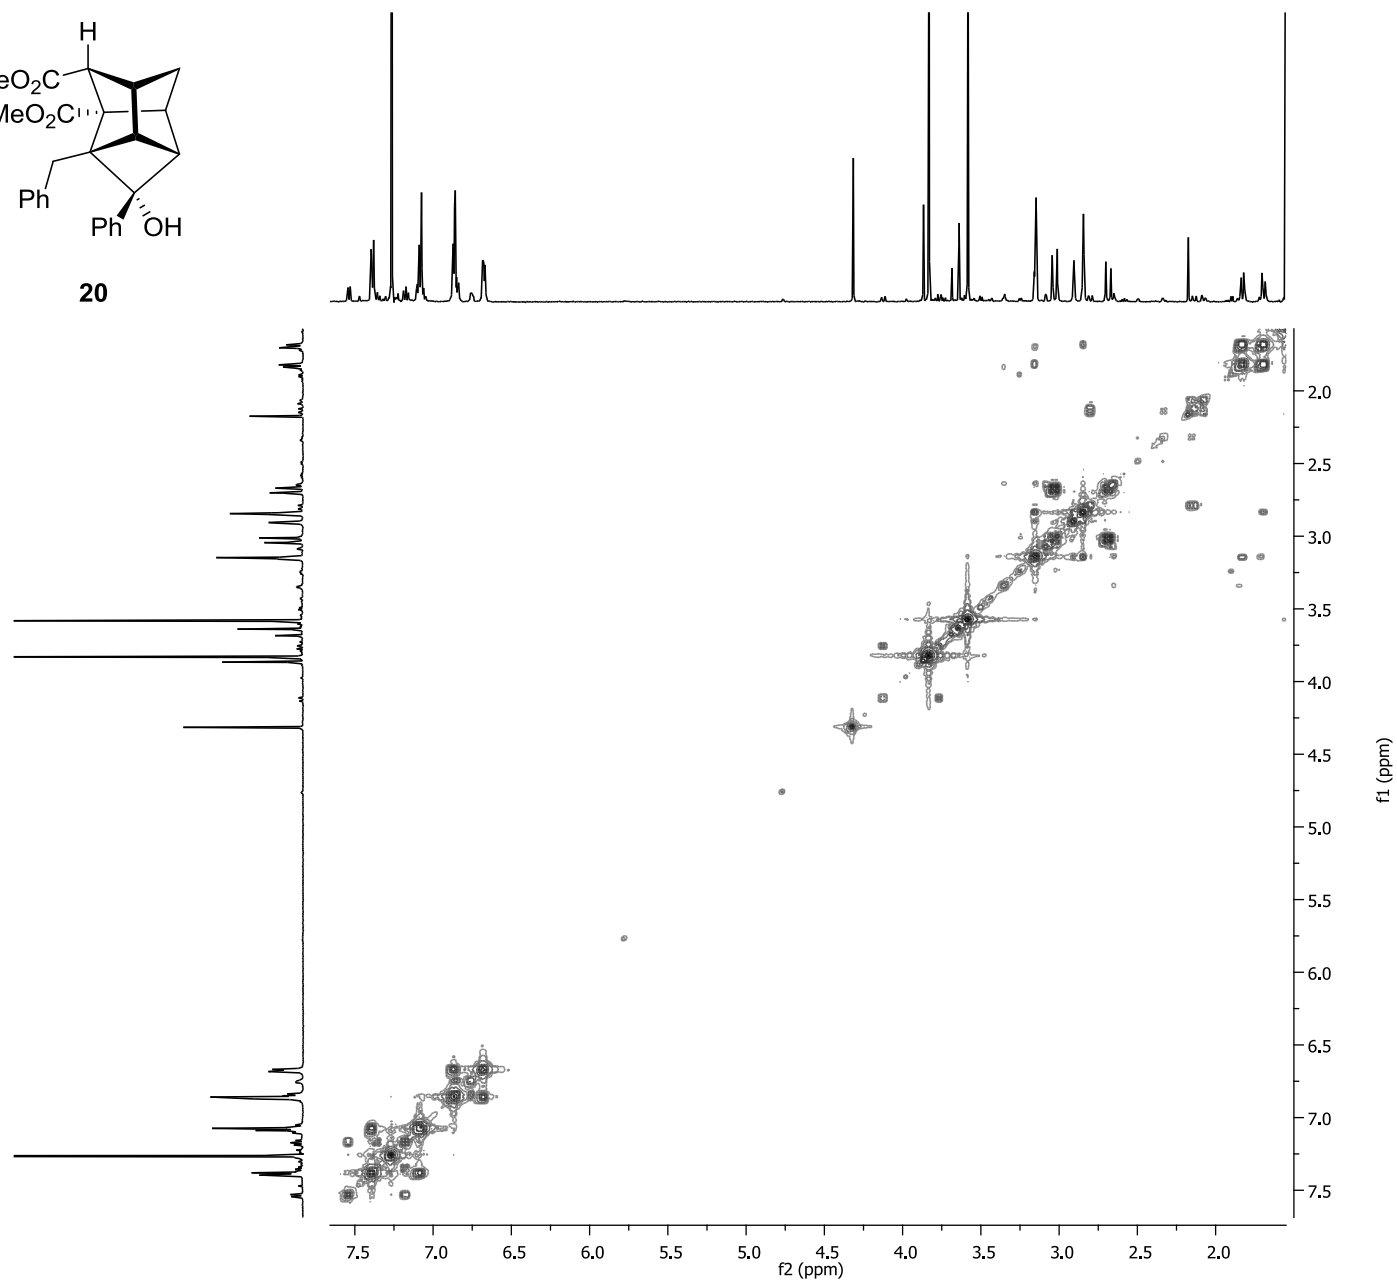

$^1\text{H}$  NMR (500 MHz,  $\text{CDCl}_3$ ):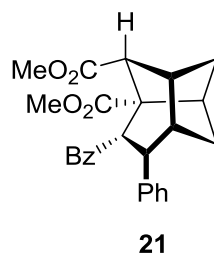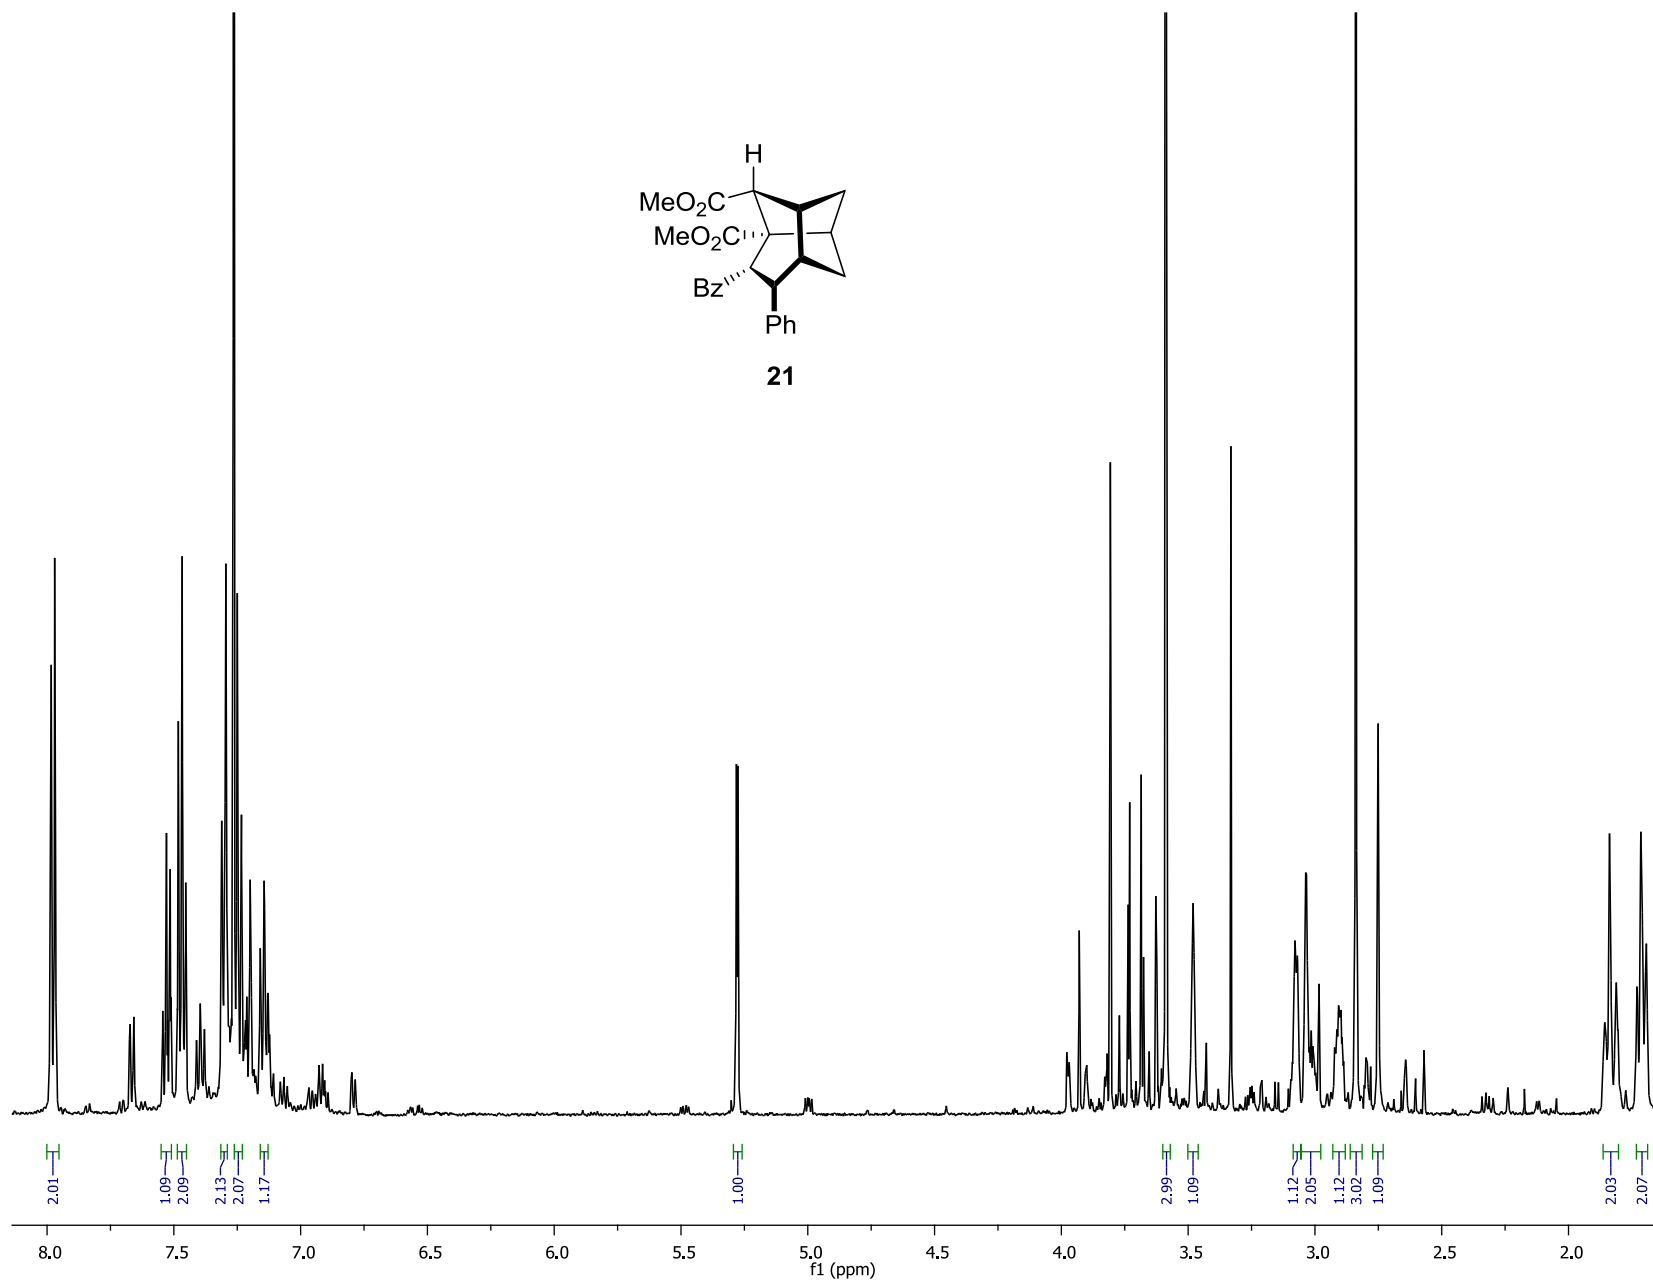

$^{13}\text{C}$  NMR (500 MHz,  $\text{CDCl}_3$ ):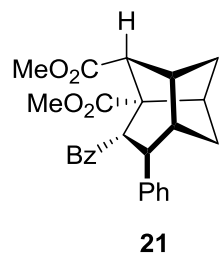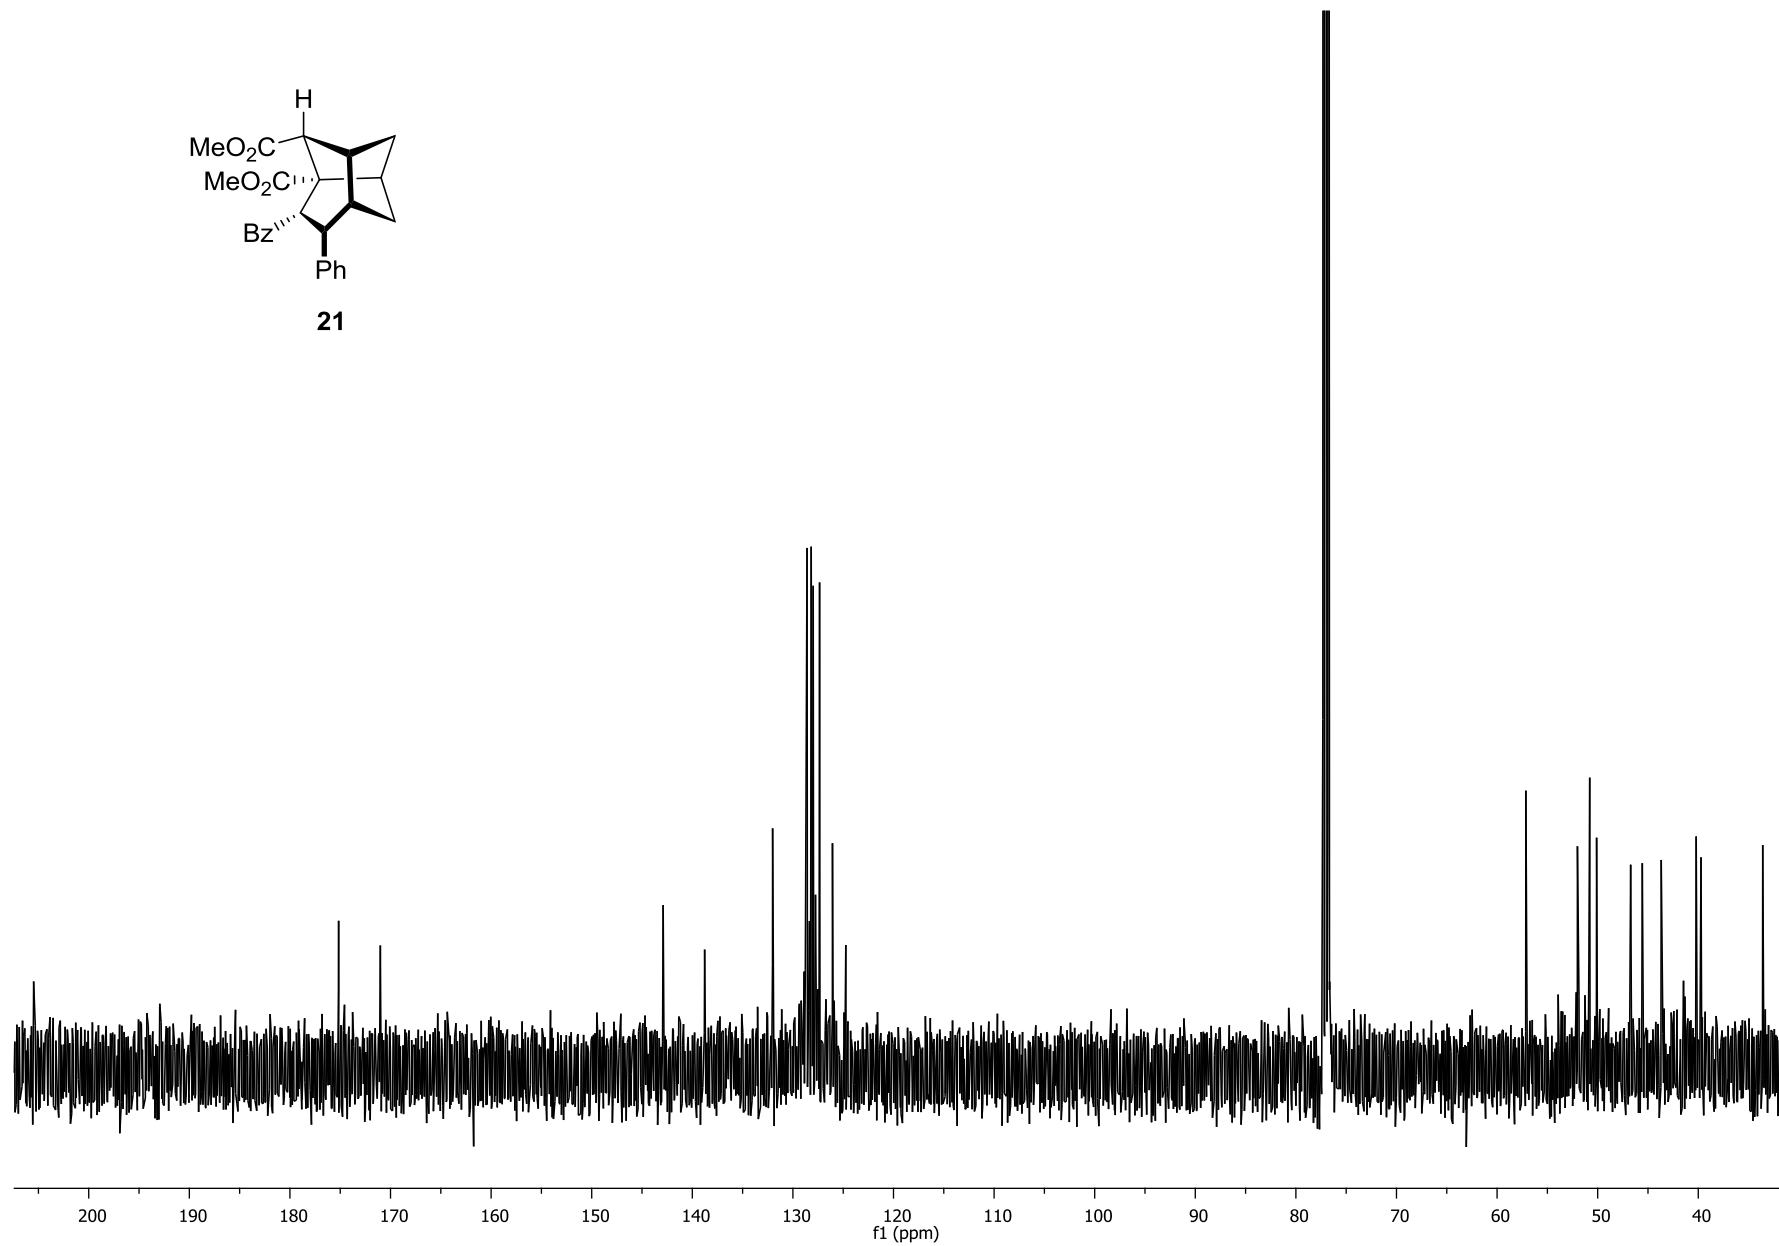

$^1\text{H}$  NMR (500 MHz,  $\text{CDCl}_3$ ):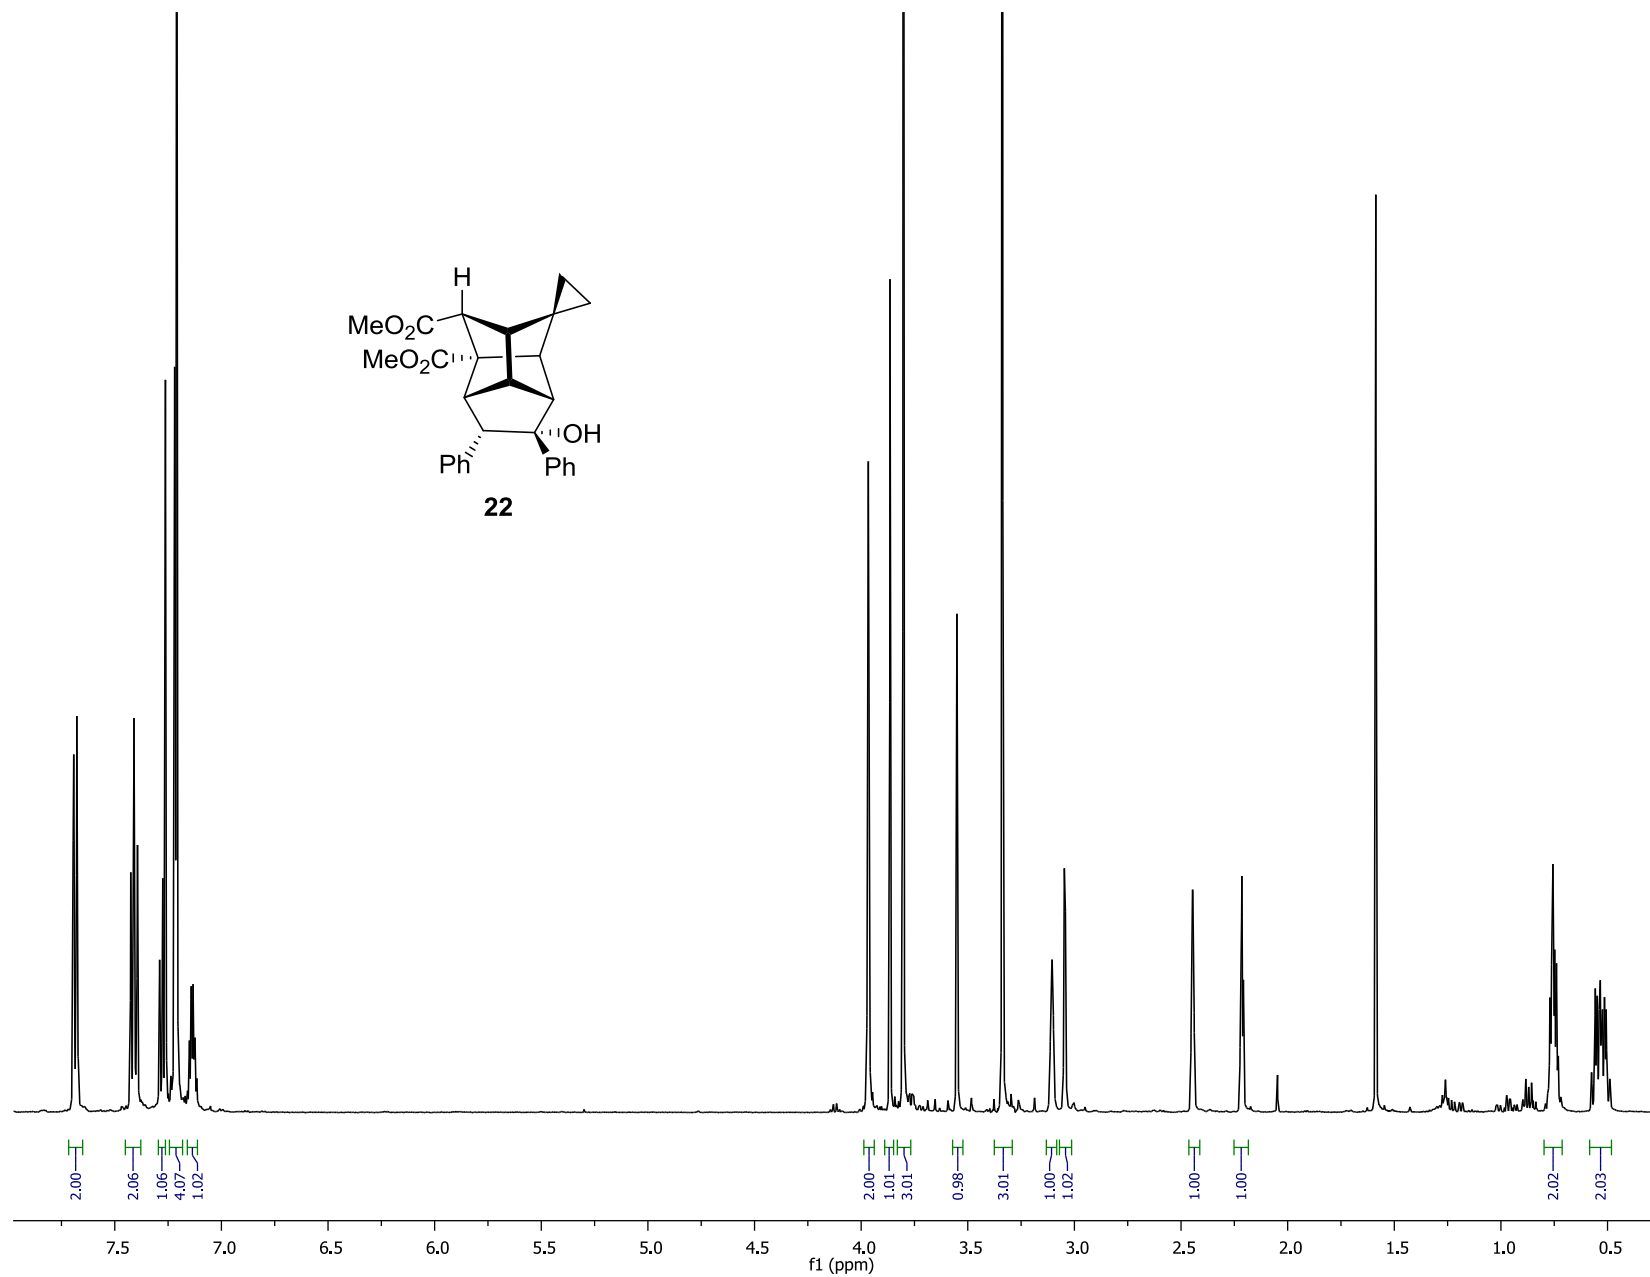



$^{13}\text{C}$  NMR (500 MHz,  $\text{CDCl}_3$ ):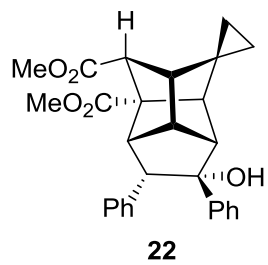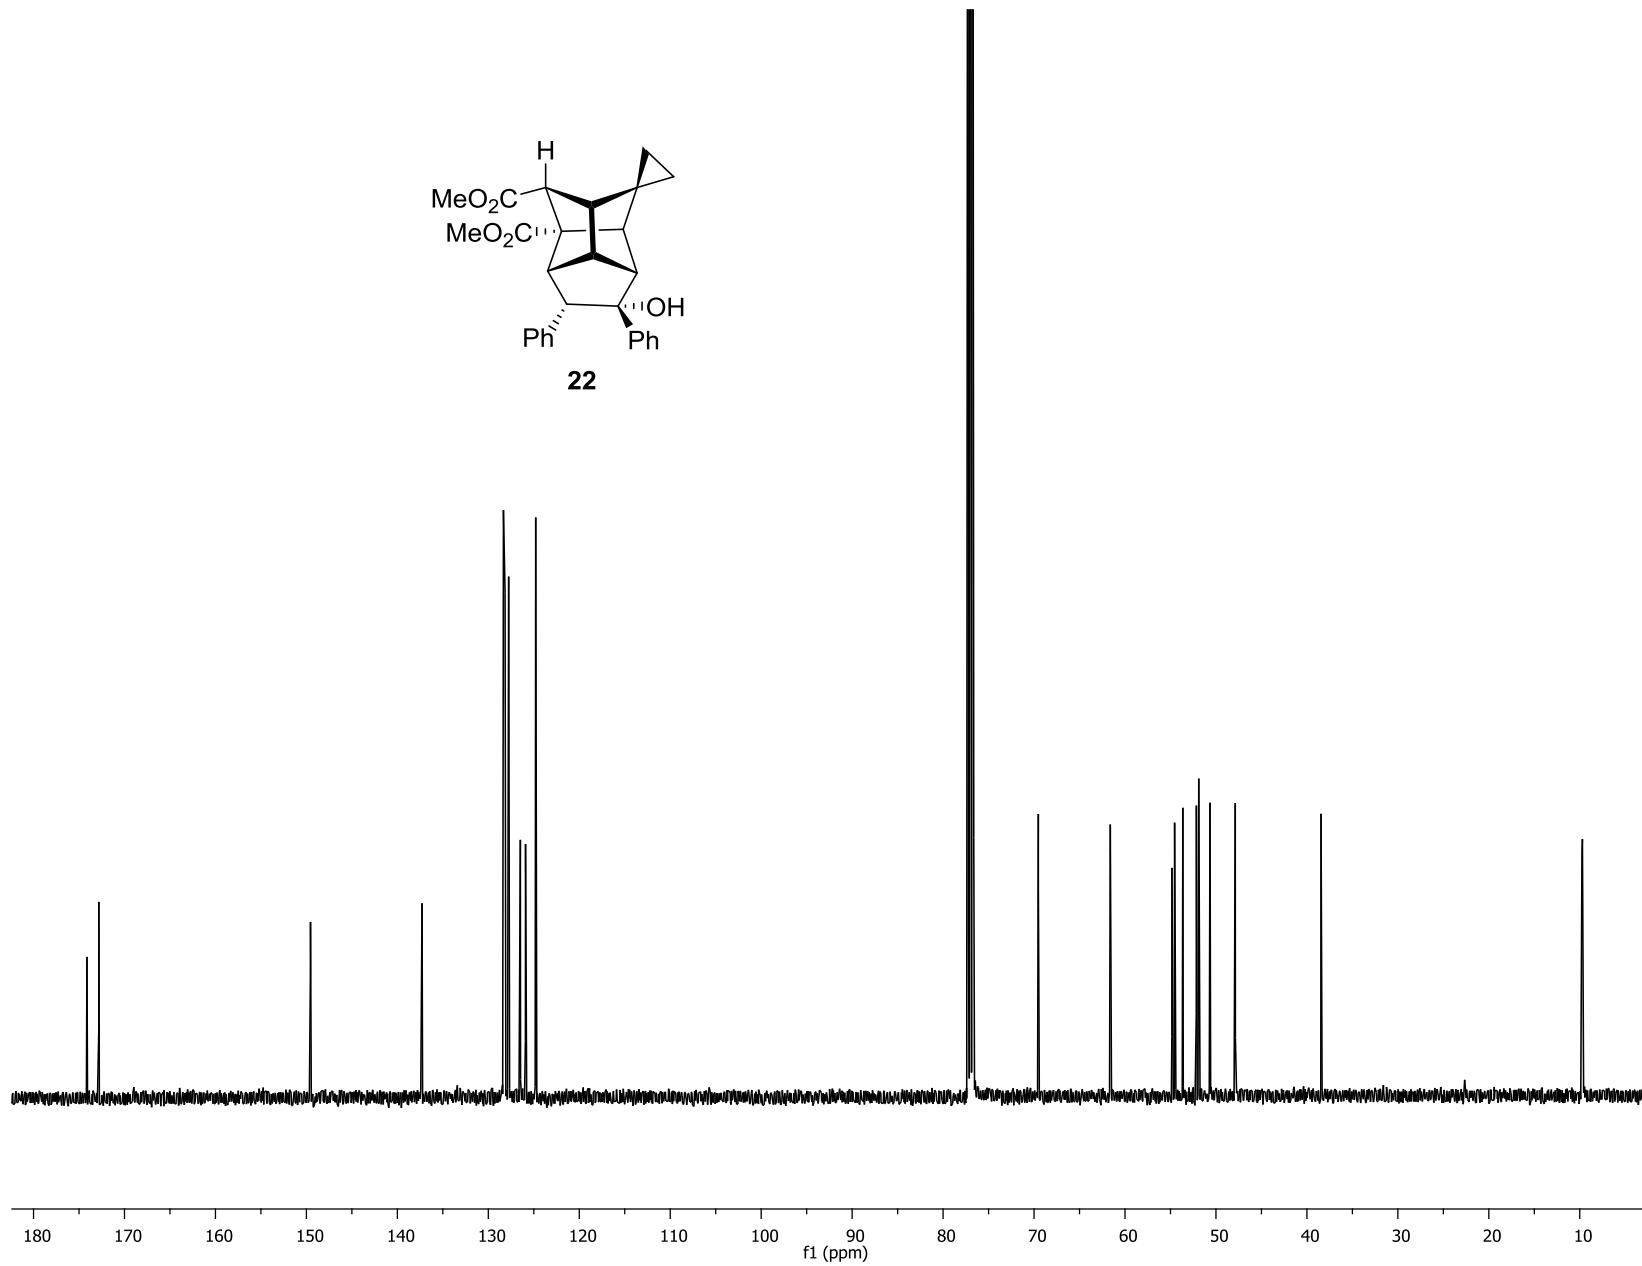

COSY (500 MHz, CDCl<sub>3</sub>):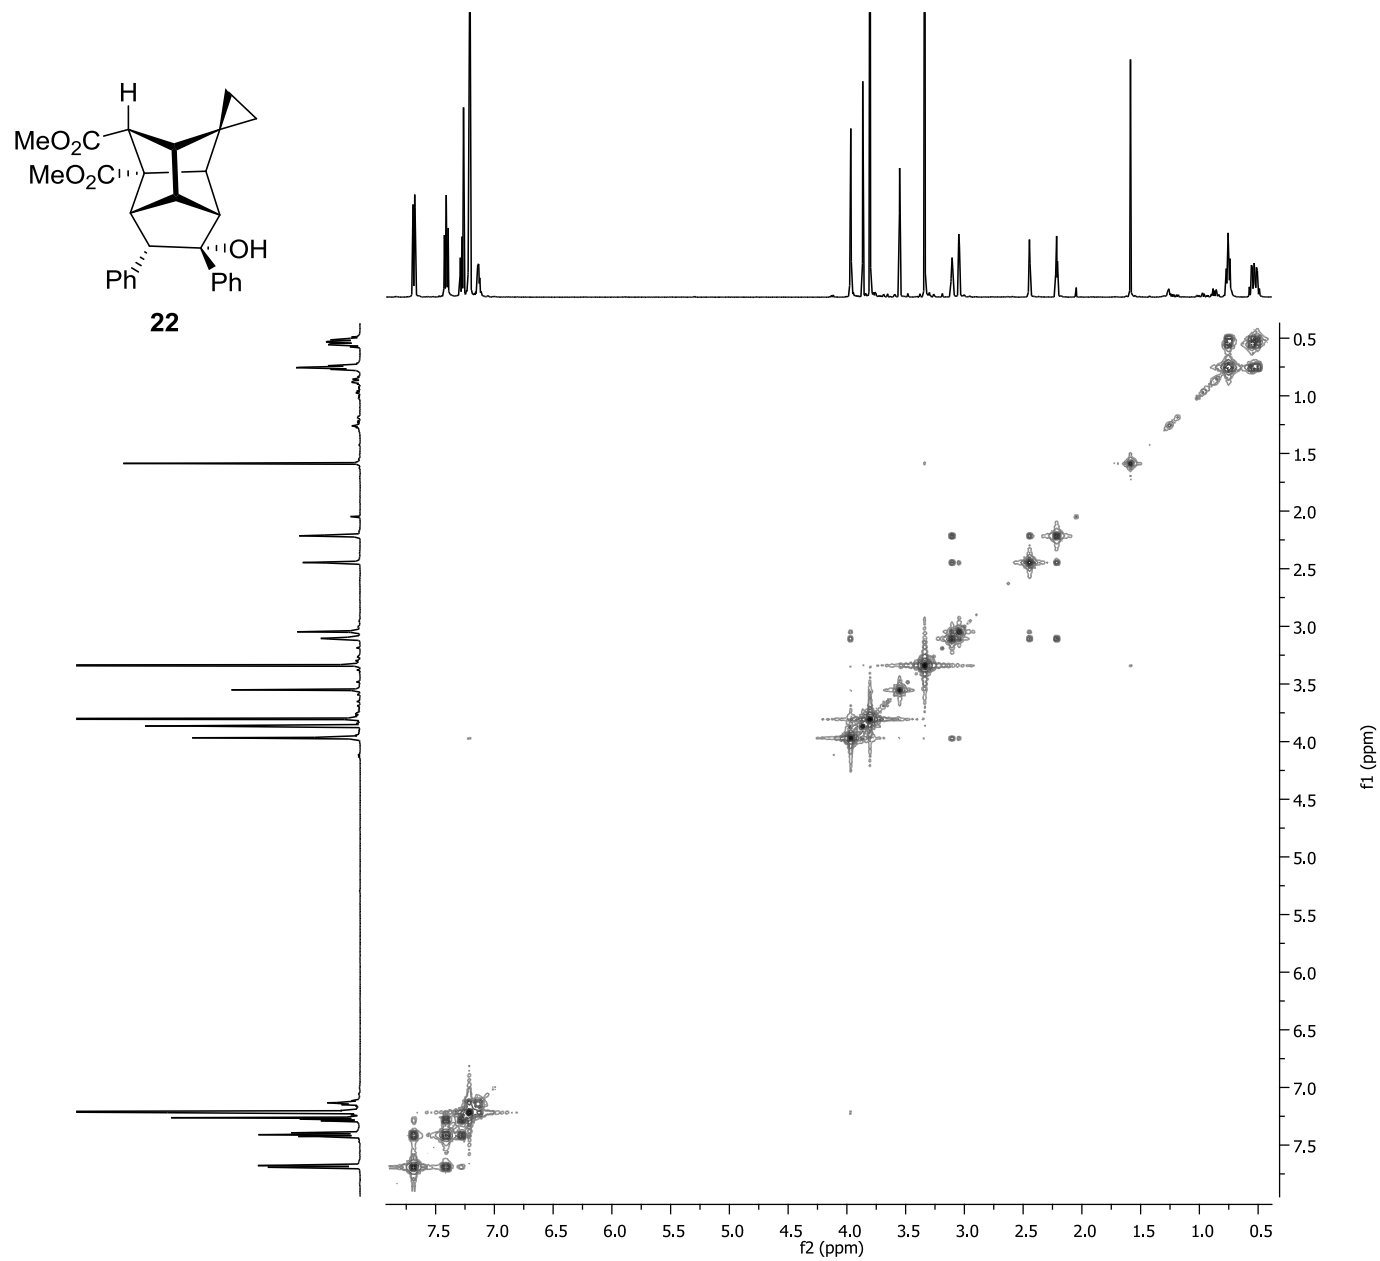

$^1\text{H}$  NMR (500 MHz,  $\text{CDCl}_3$ ):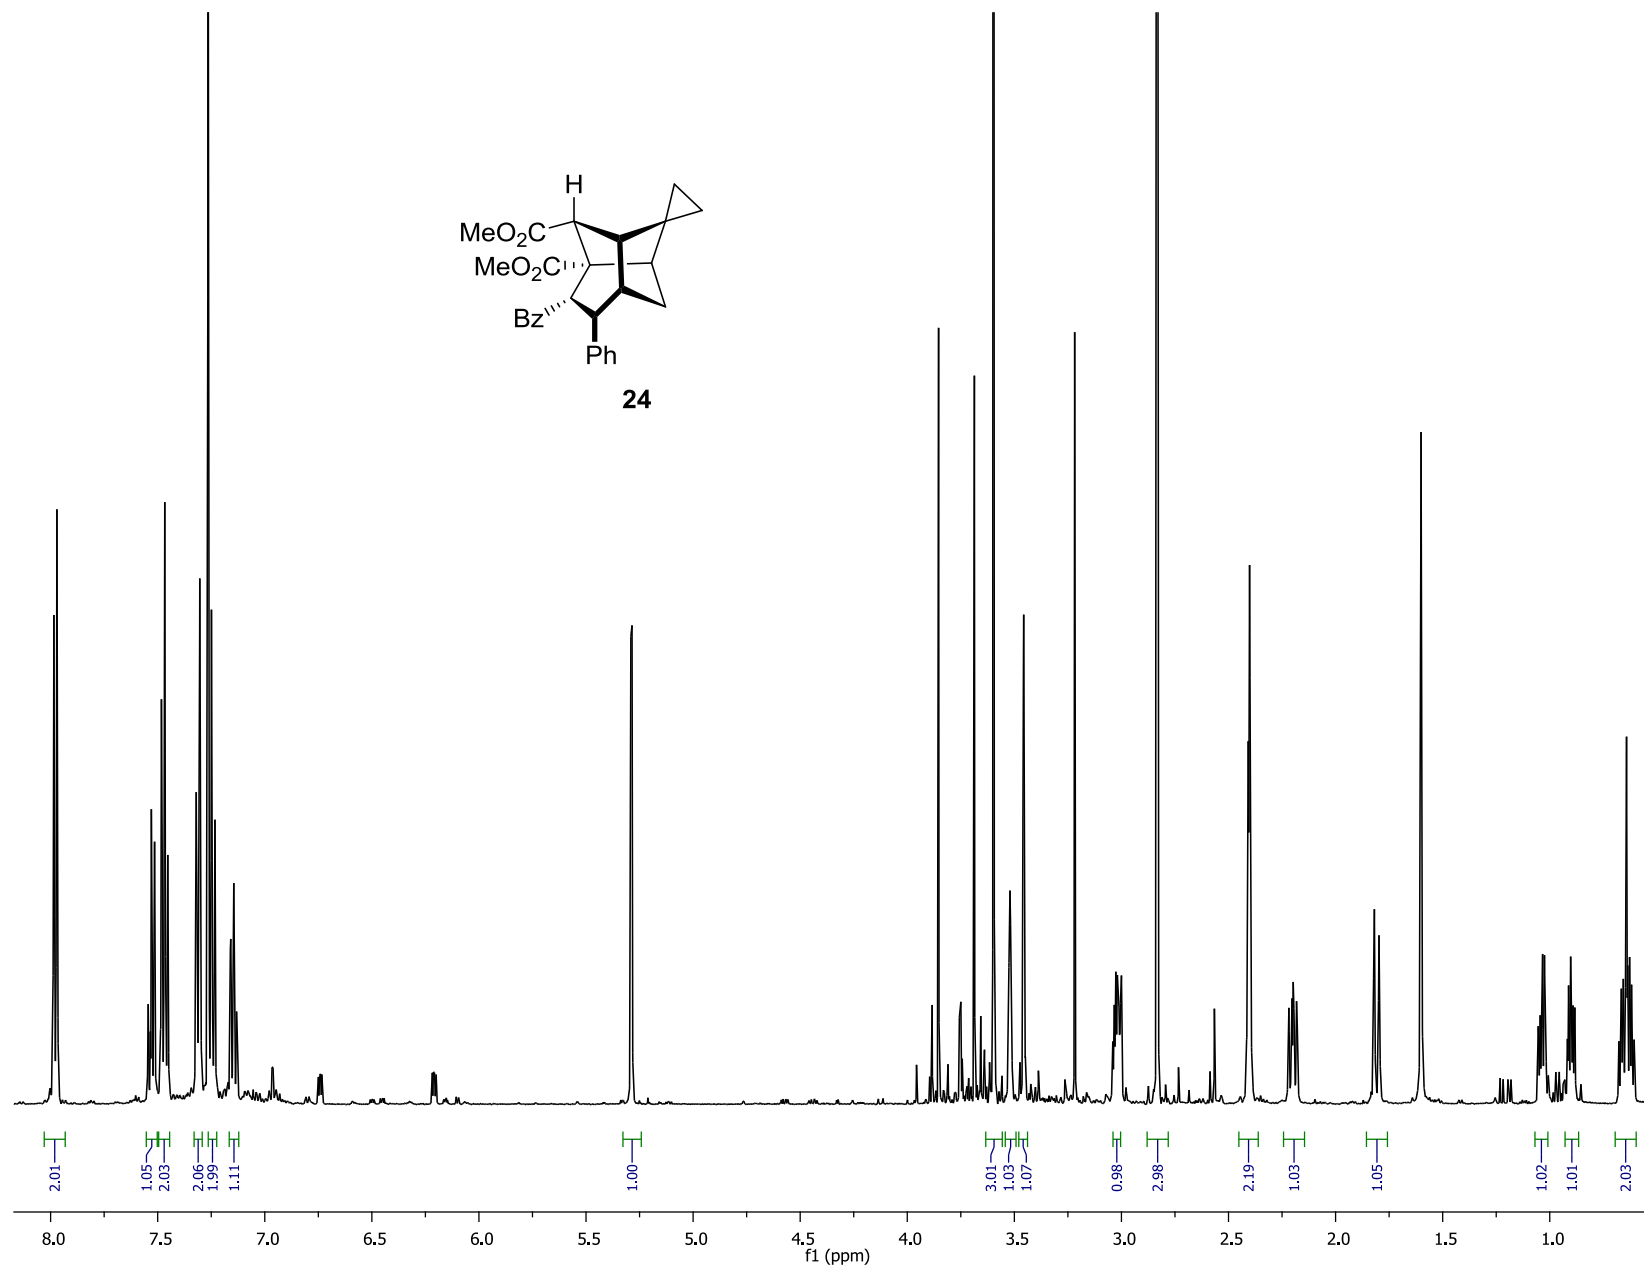

$^{13}\text{C}$  NMR (500 MHz,  $\text{CDCl}_3$ ):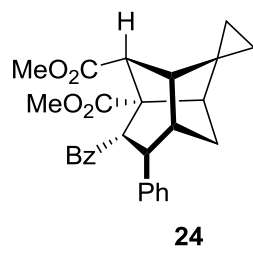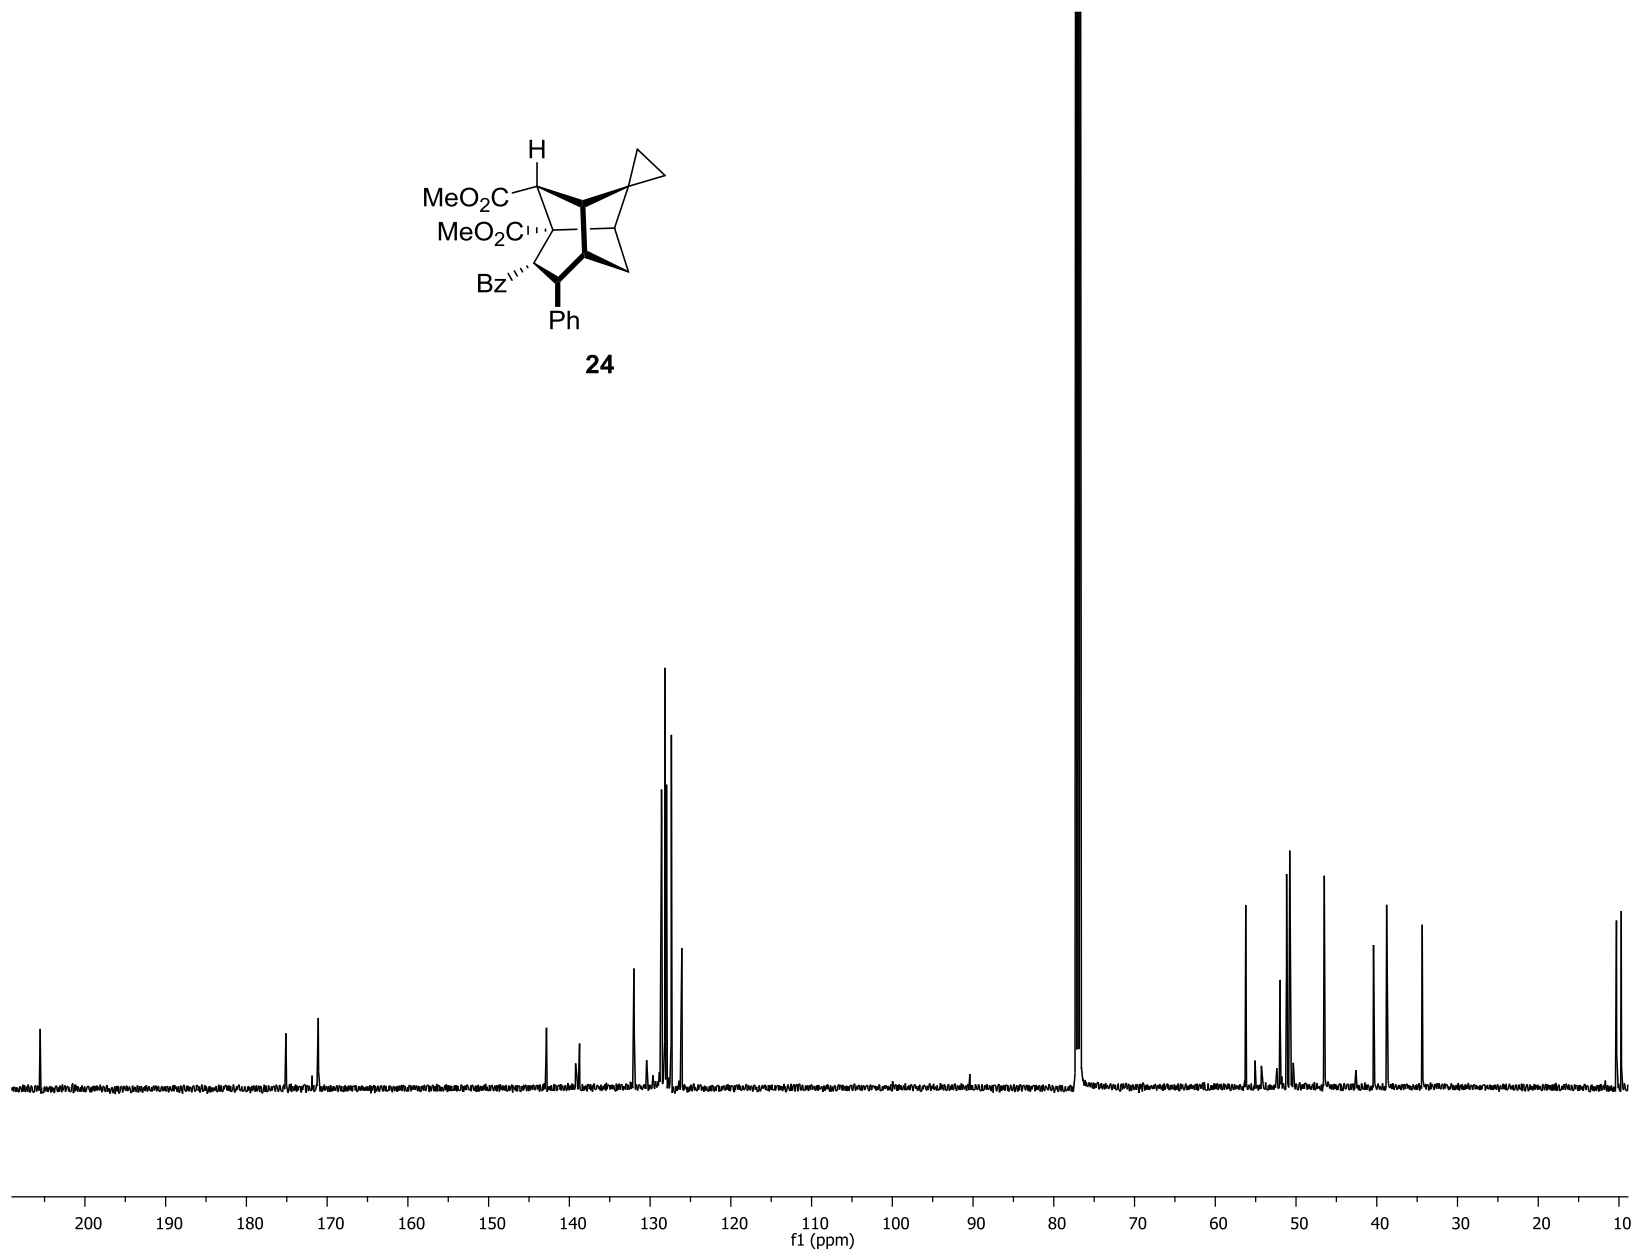

COSY (500 MHz, CDCl<sub>3</sub>):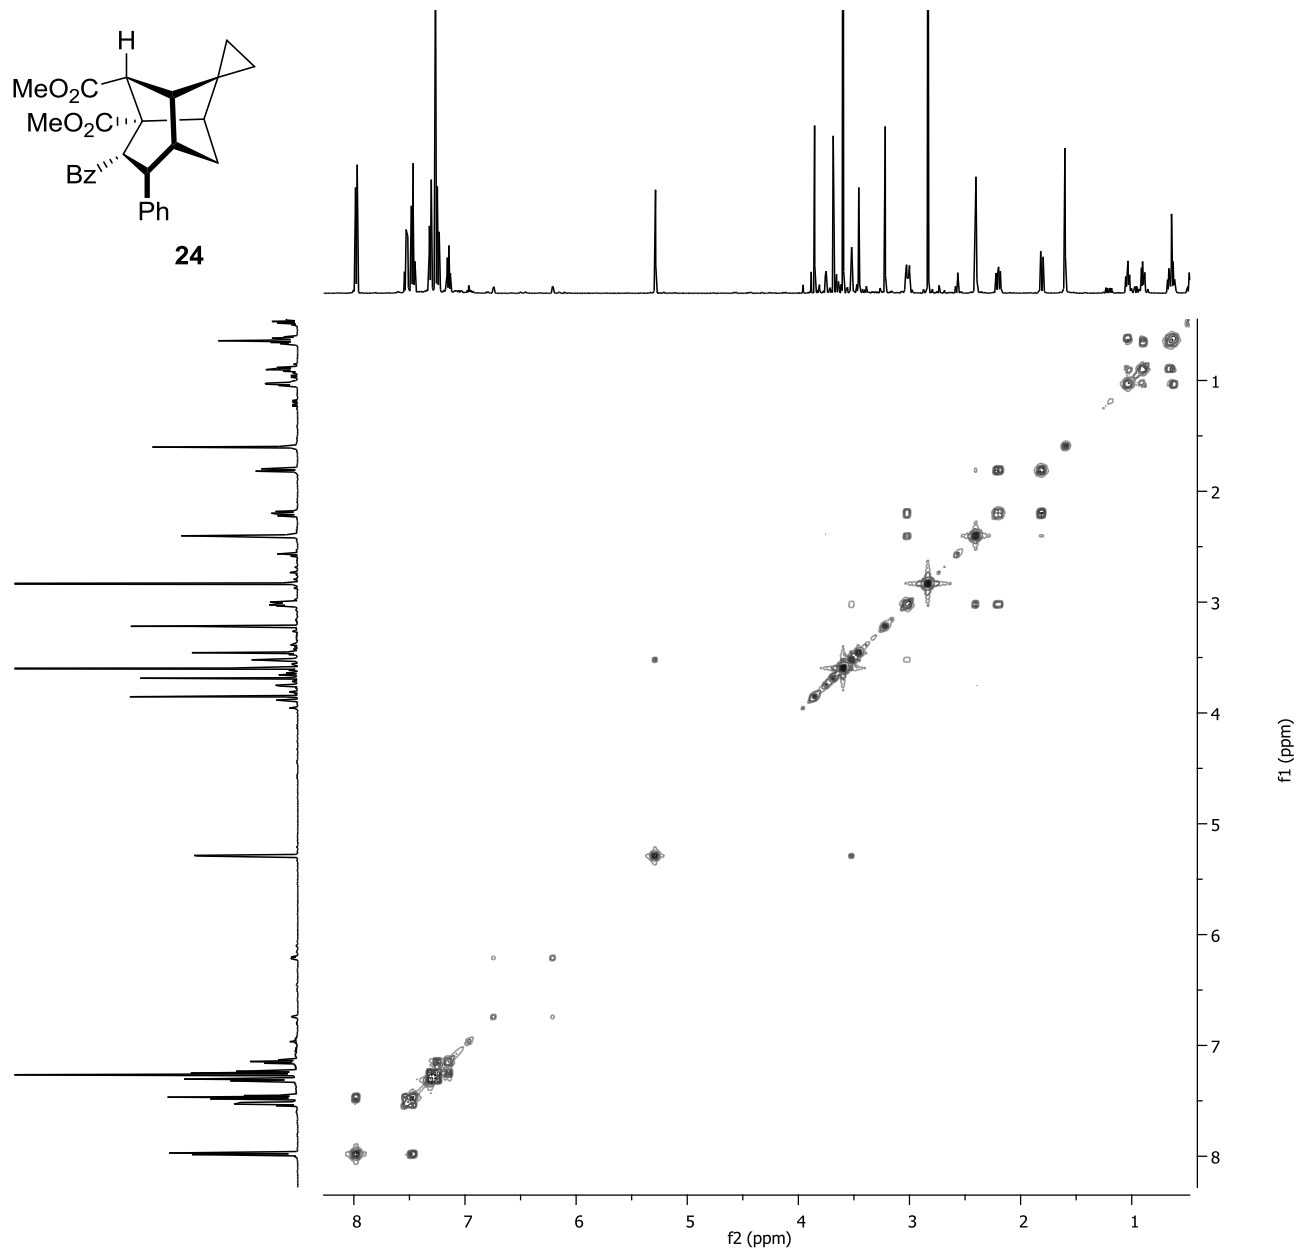

$^1\text{H}$  NMR (500 MHz,  $\text{CDCl}_3$ ):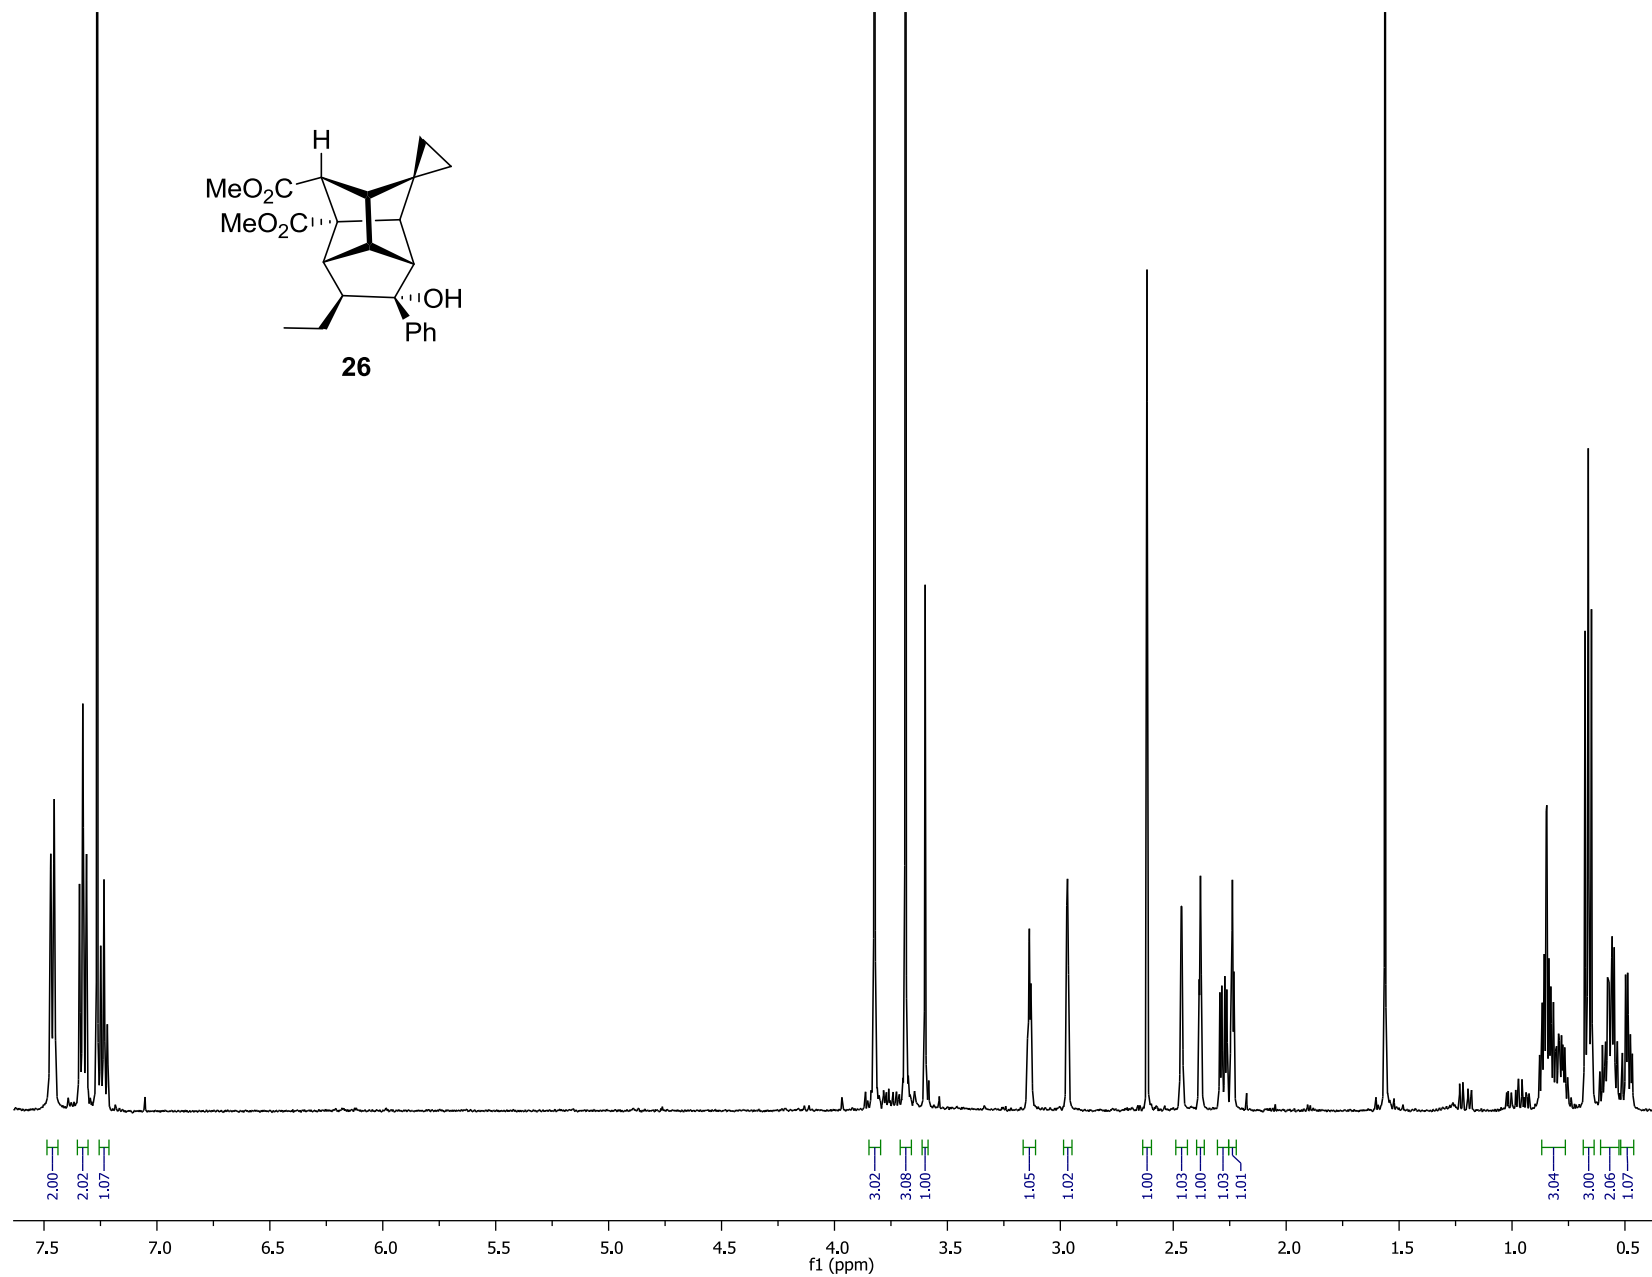

$^{13}\text{C}$  NMR (500 MHz,  $\text{CDCl}_3$ ):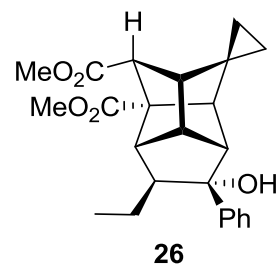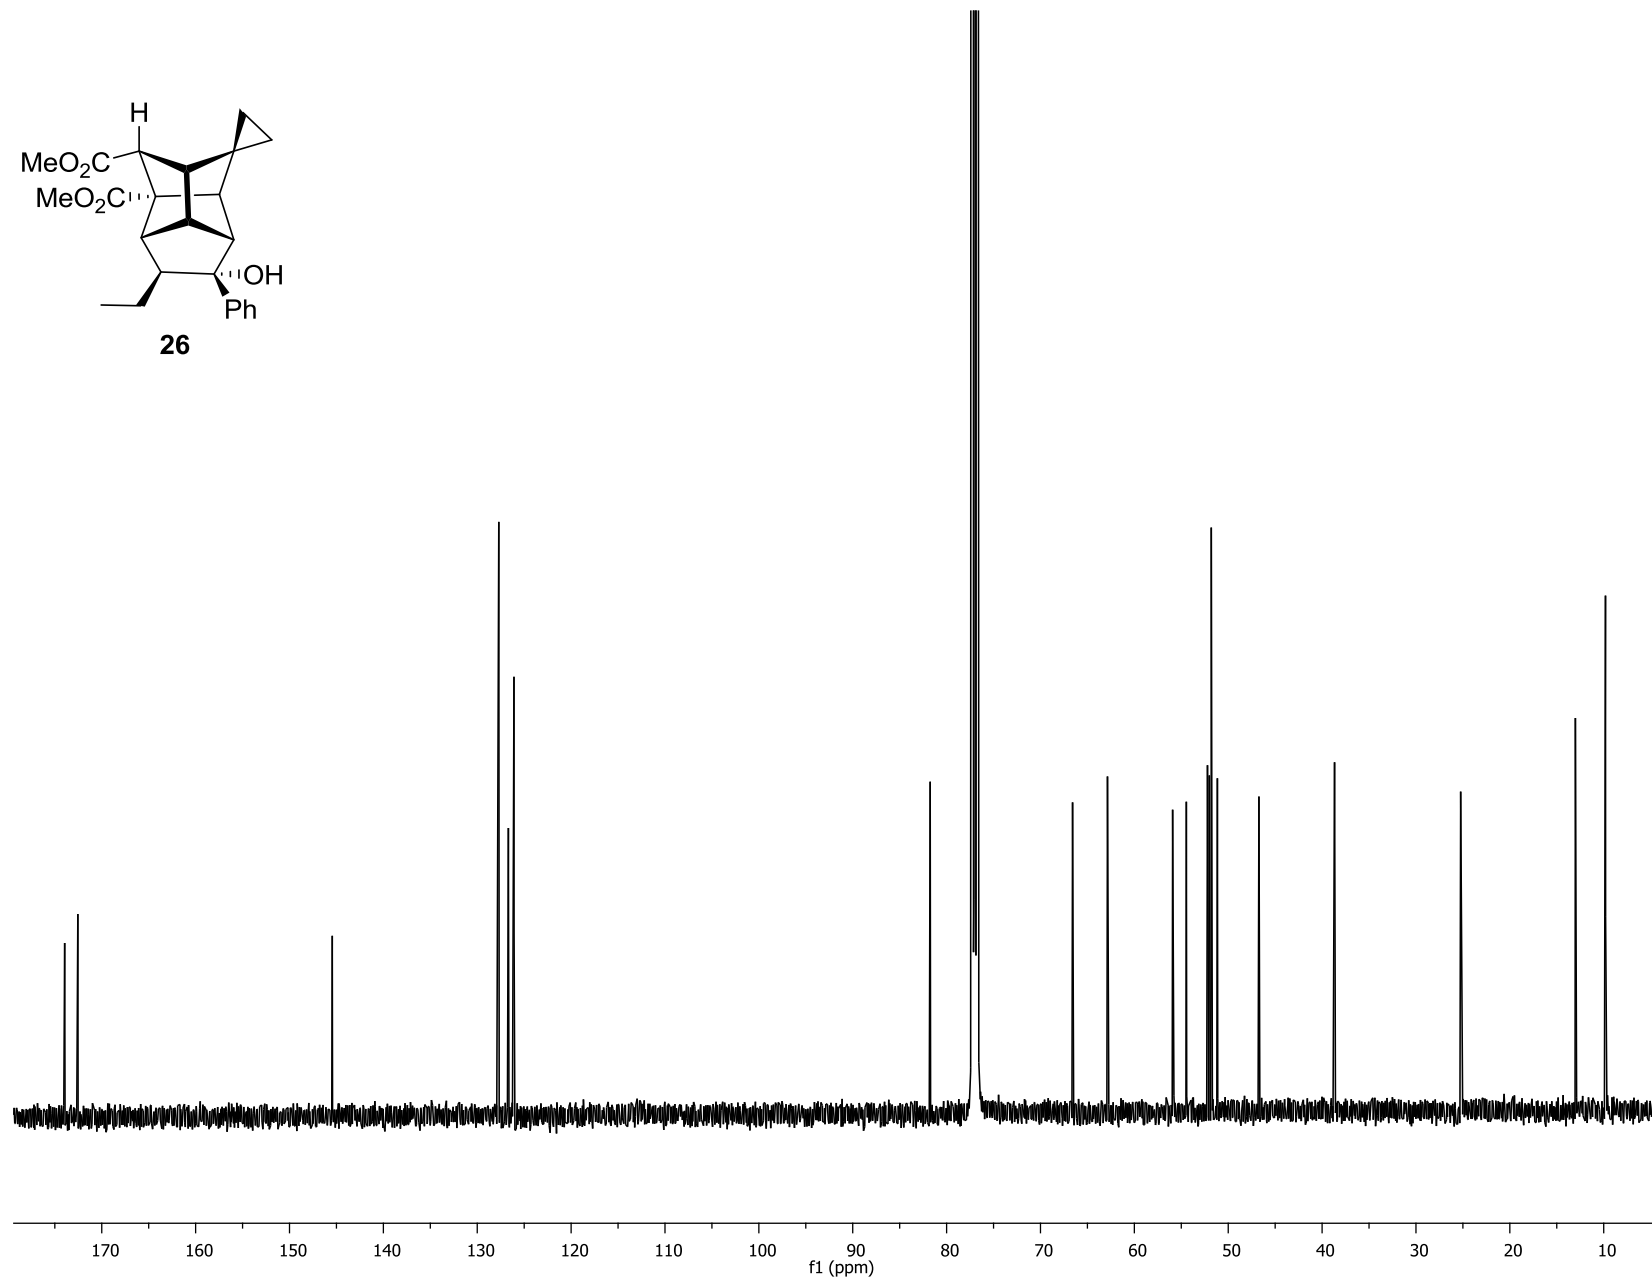

COSY (500 MHz, CDCl<sub>3</sub>):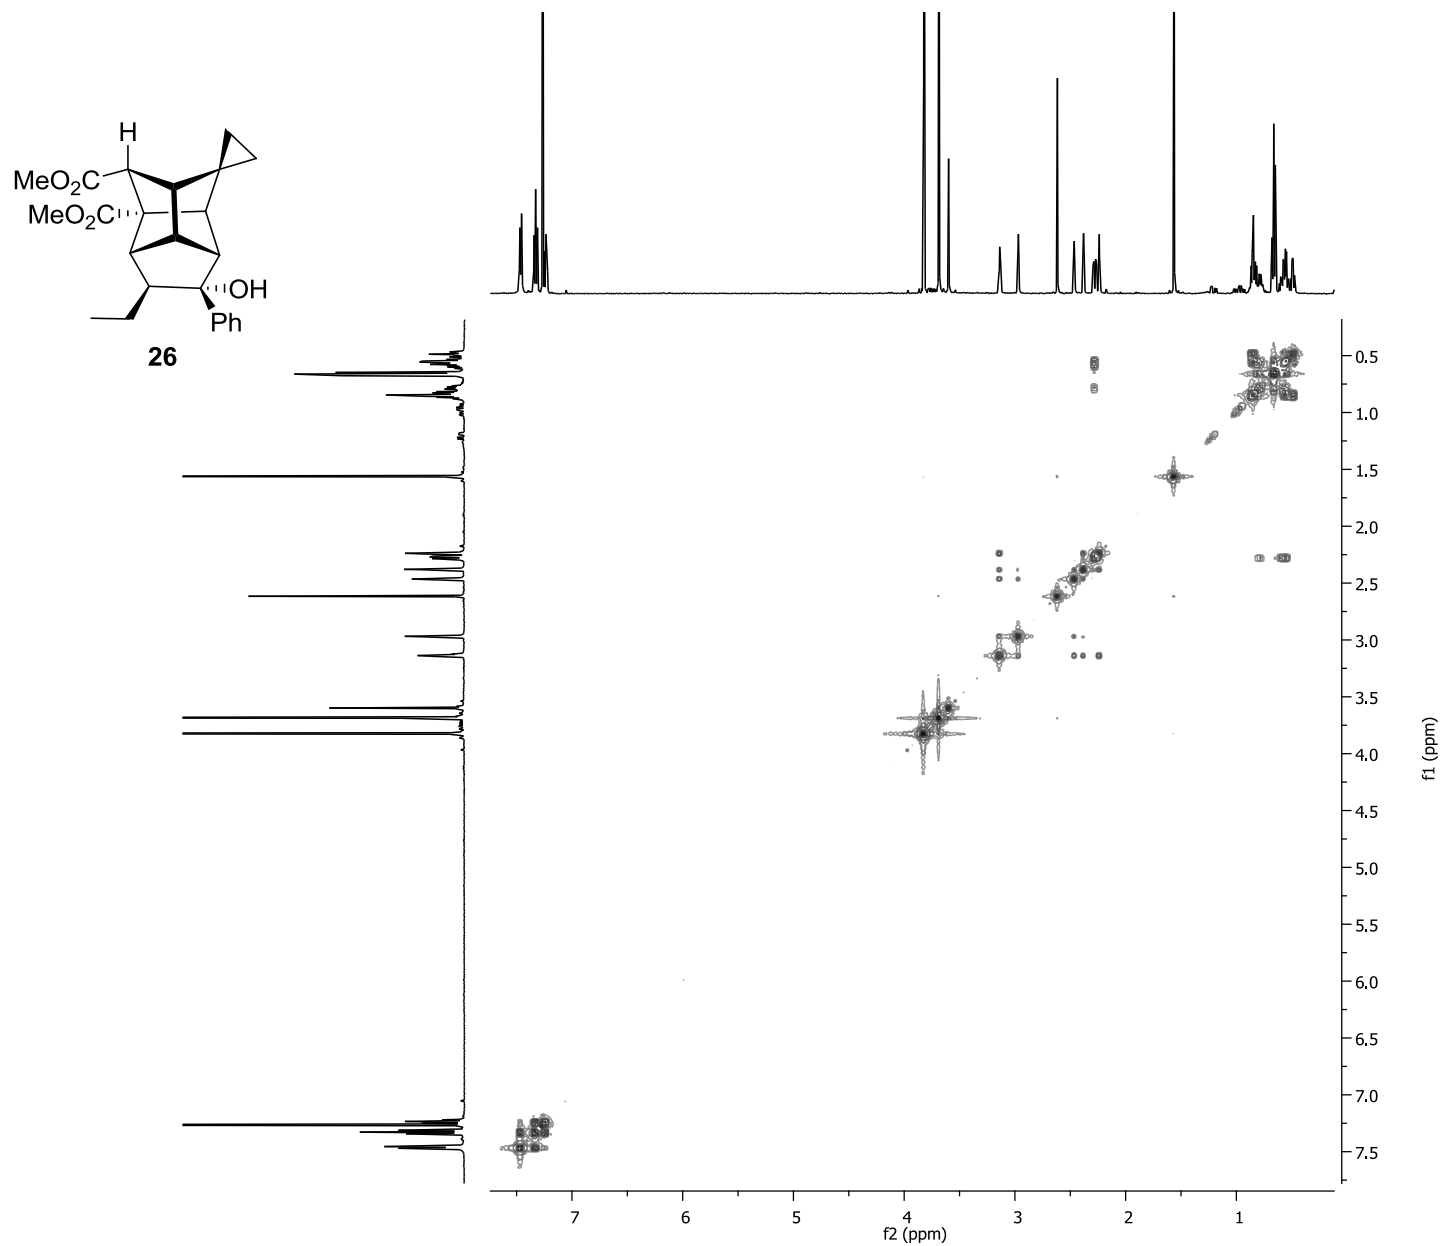



$^1\text{H}$  NMR of the mixture of **9c-2** and **9c-3** (500 MHz,  $\text{CDCl}_3$ ):

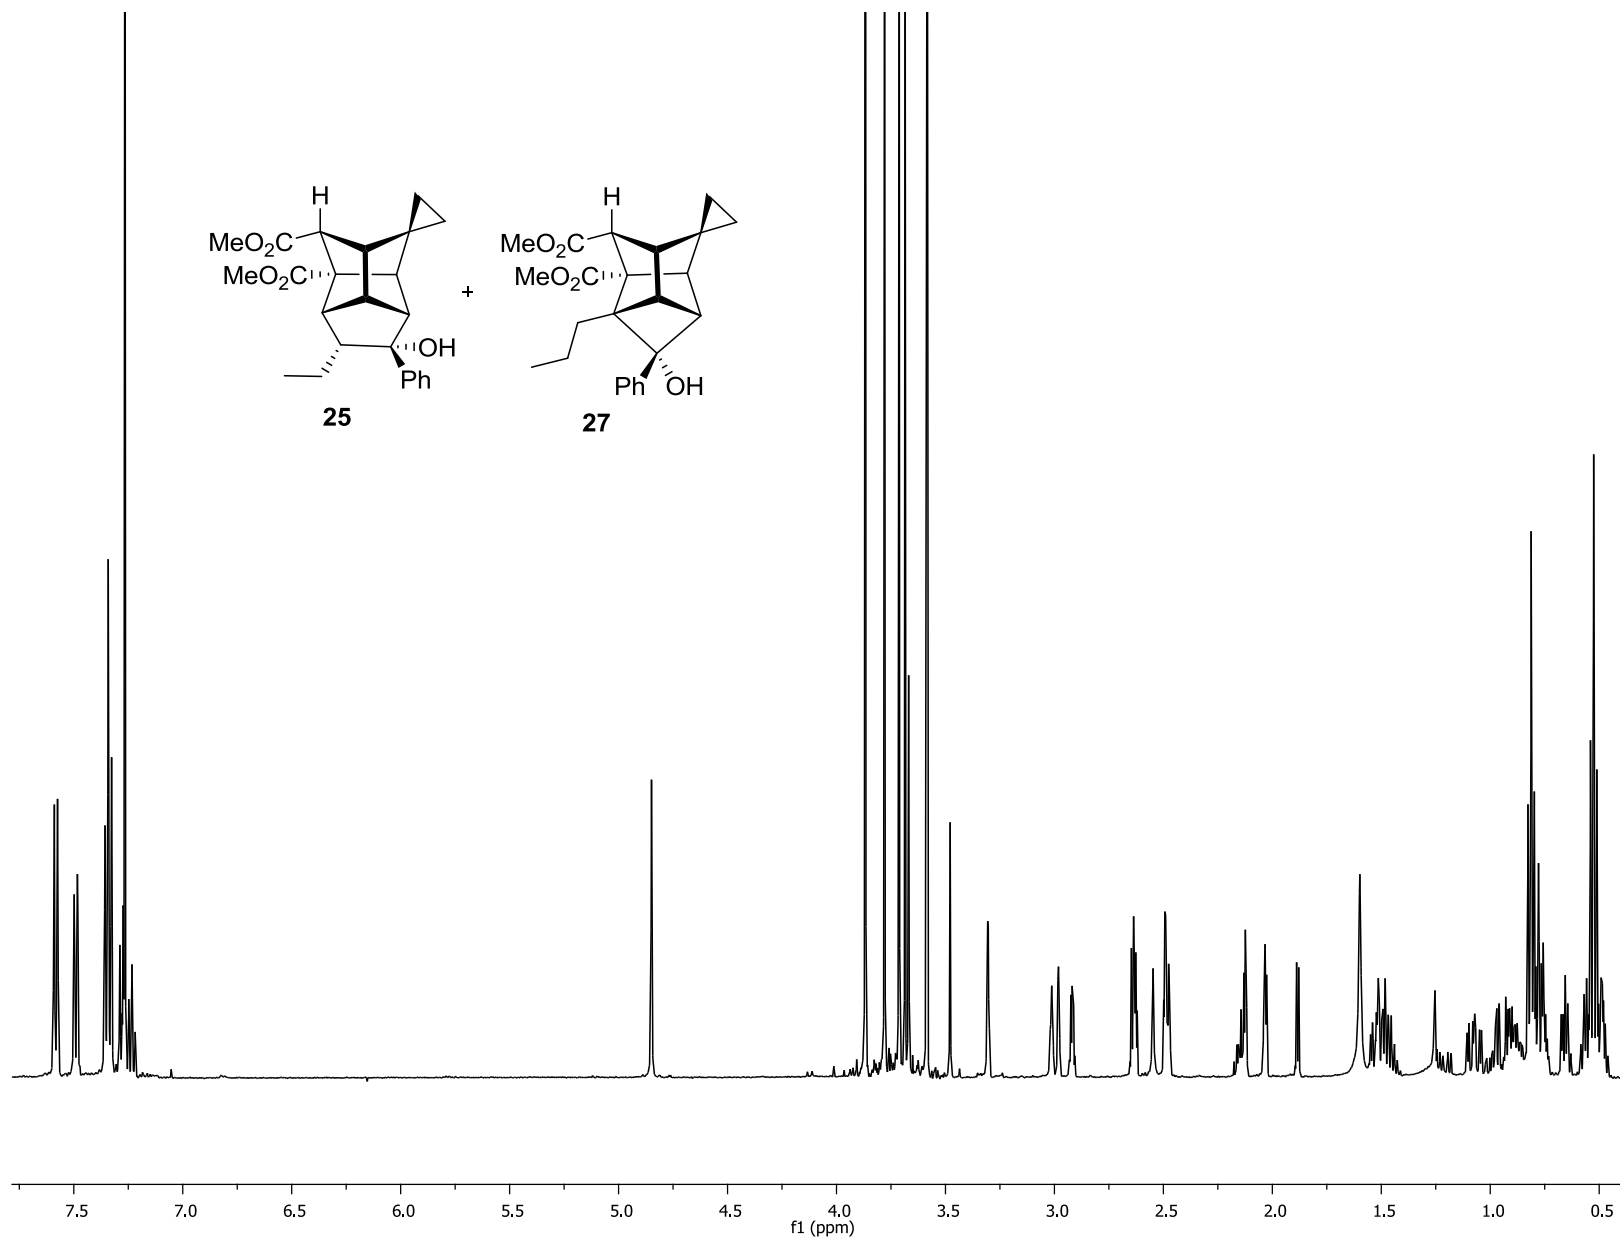

$^1\text{H}$  NMR (500 MHz,  $\text{CDCl}_3$ ):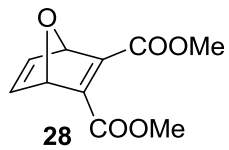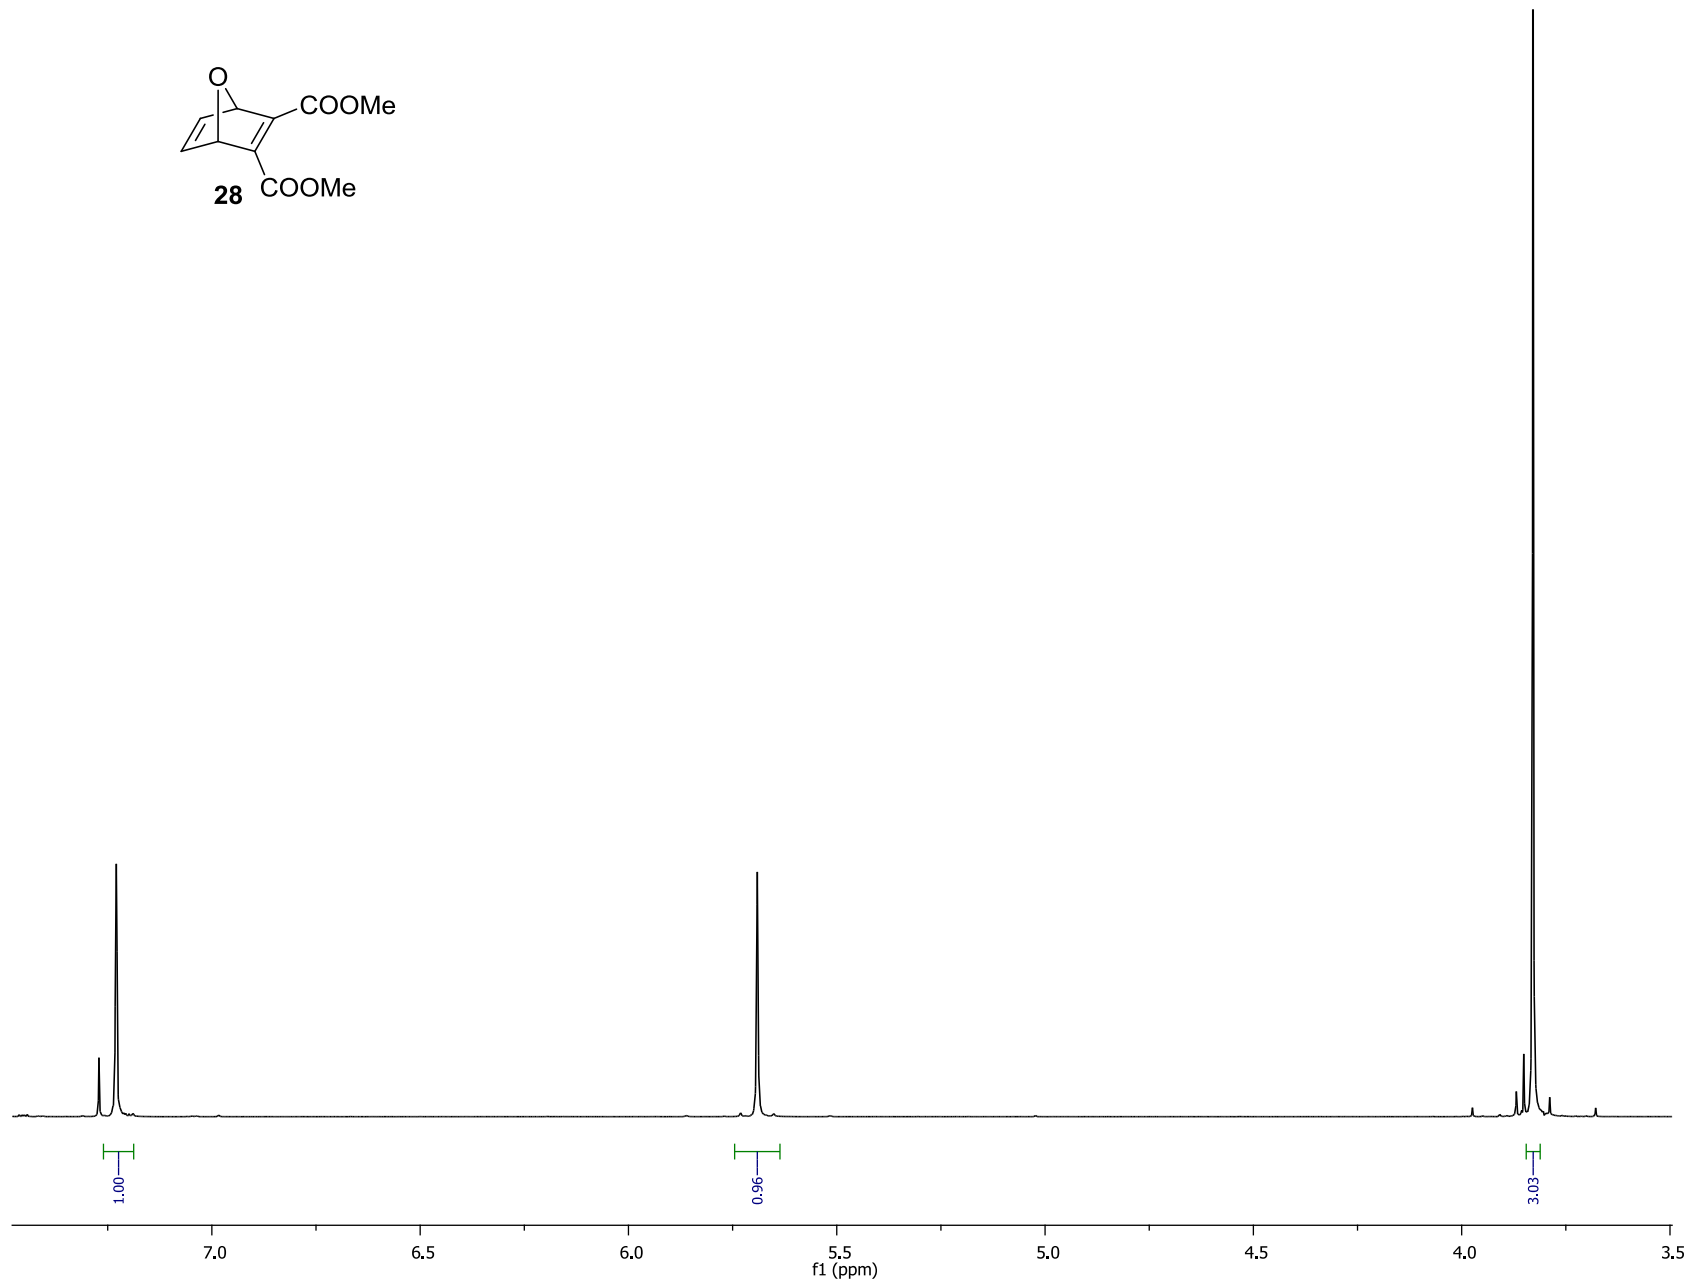

$^1\text{H}$  NMR (500 MHz,  $\text{CDCl}_3$ ):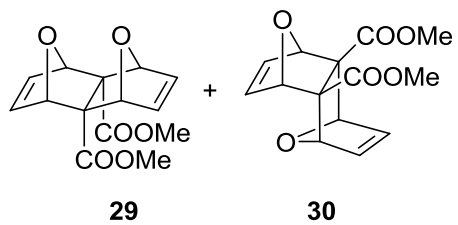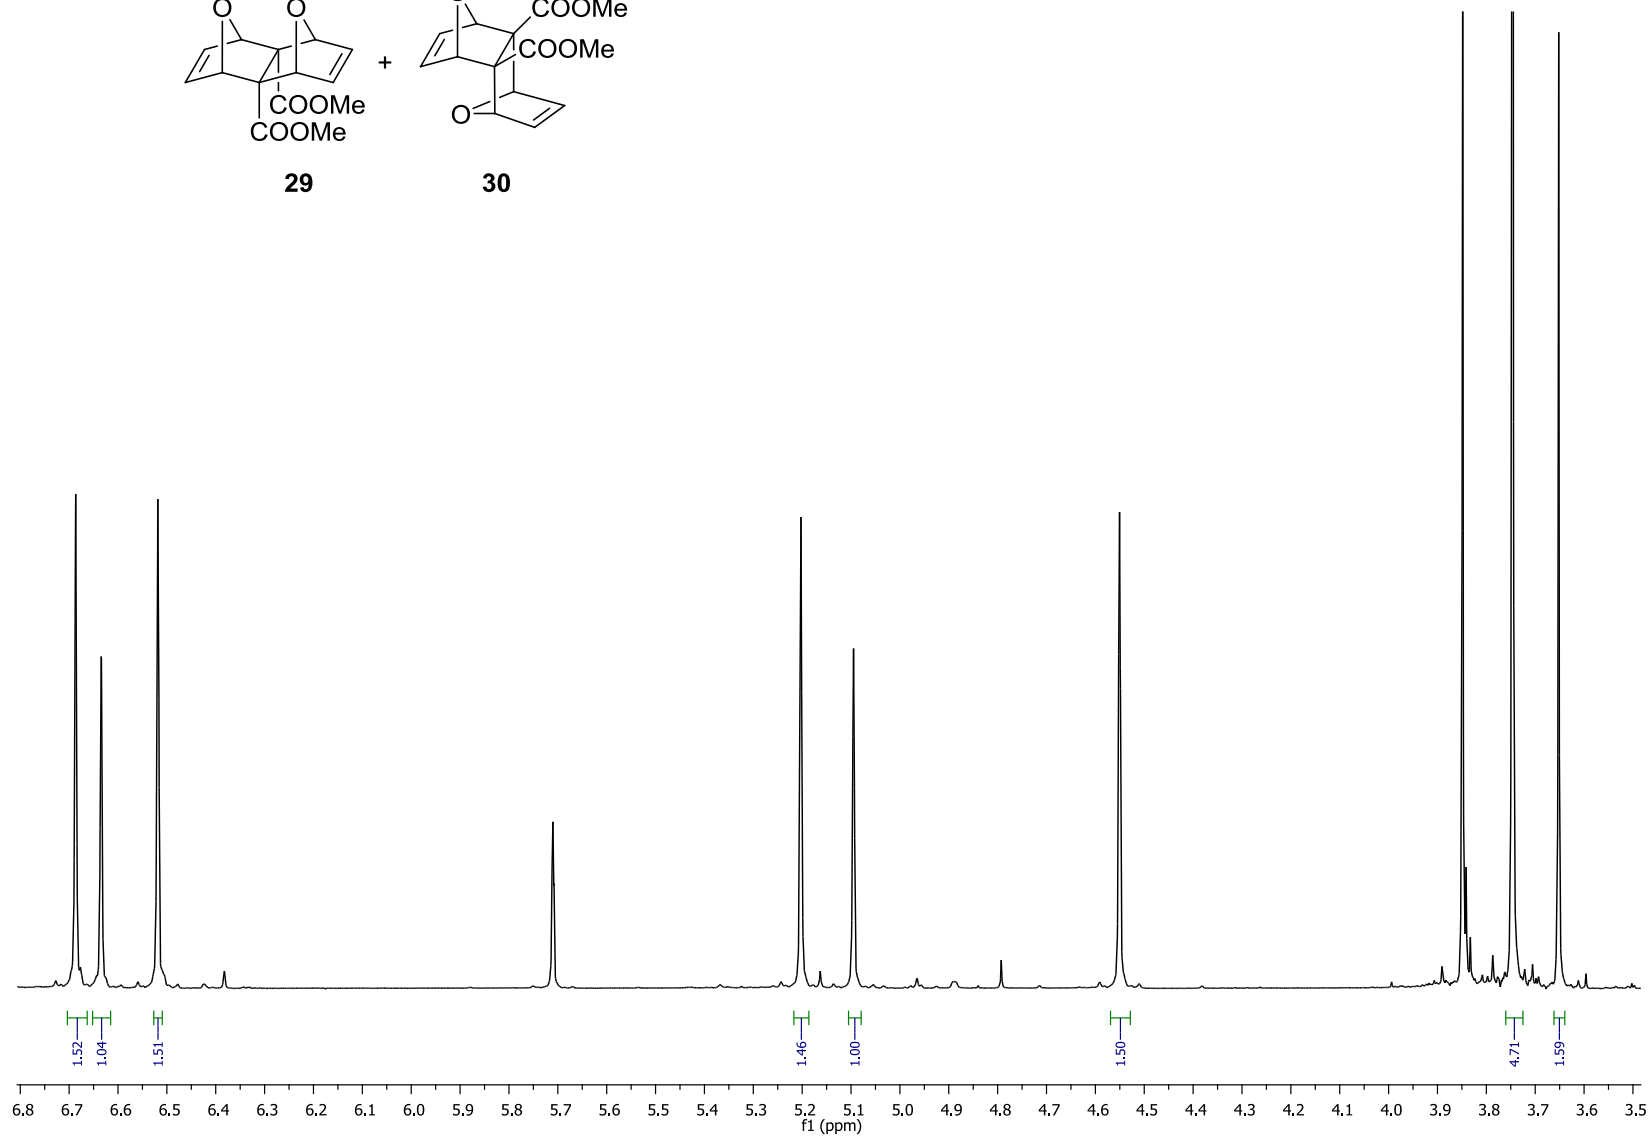

$^{13}\text{C}$  NMR (500 MHz,  $\text{CDCl}_3$ ):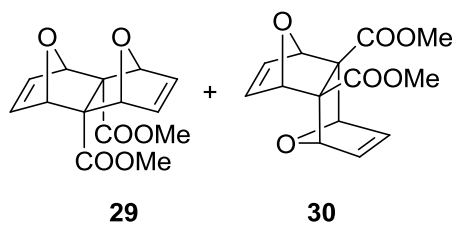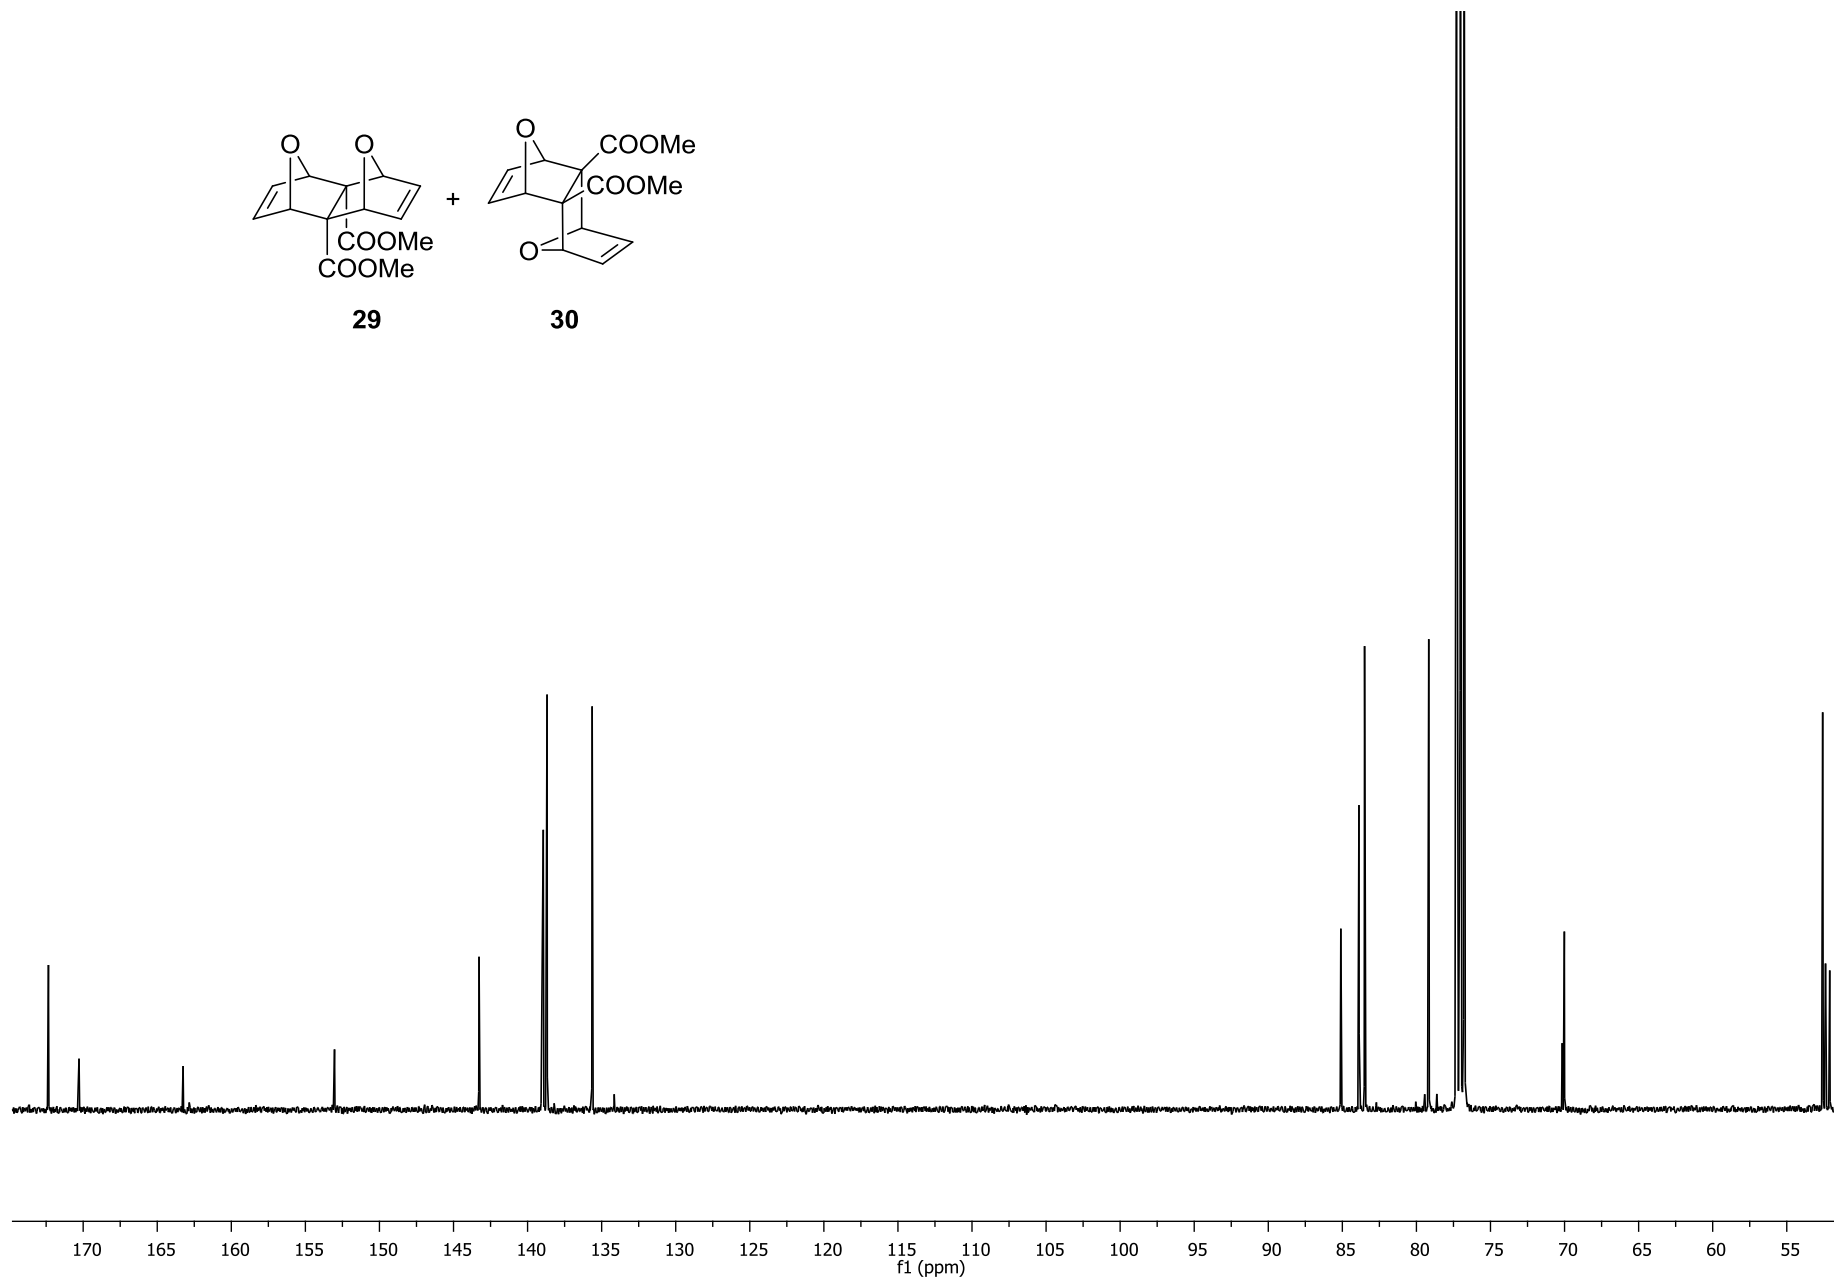

$^1\text{H}$  NMR (500 MHz,  $\text{CDCl}_3$ ):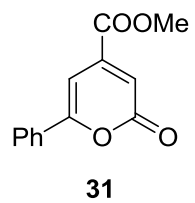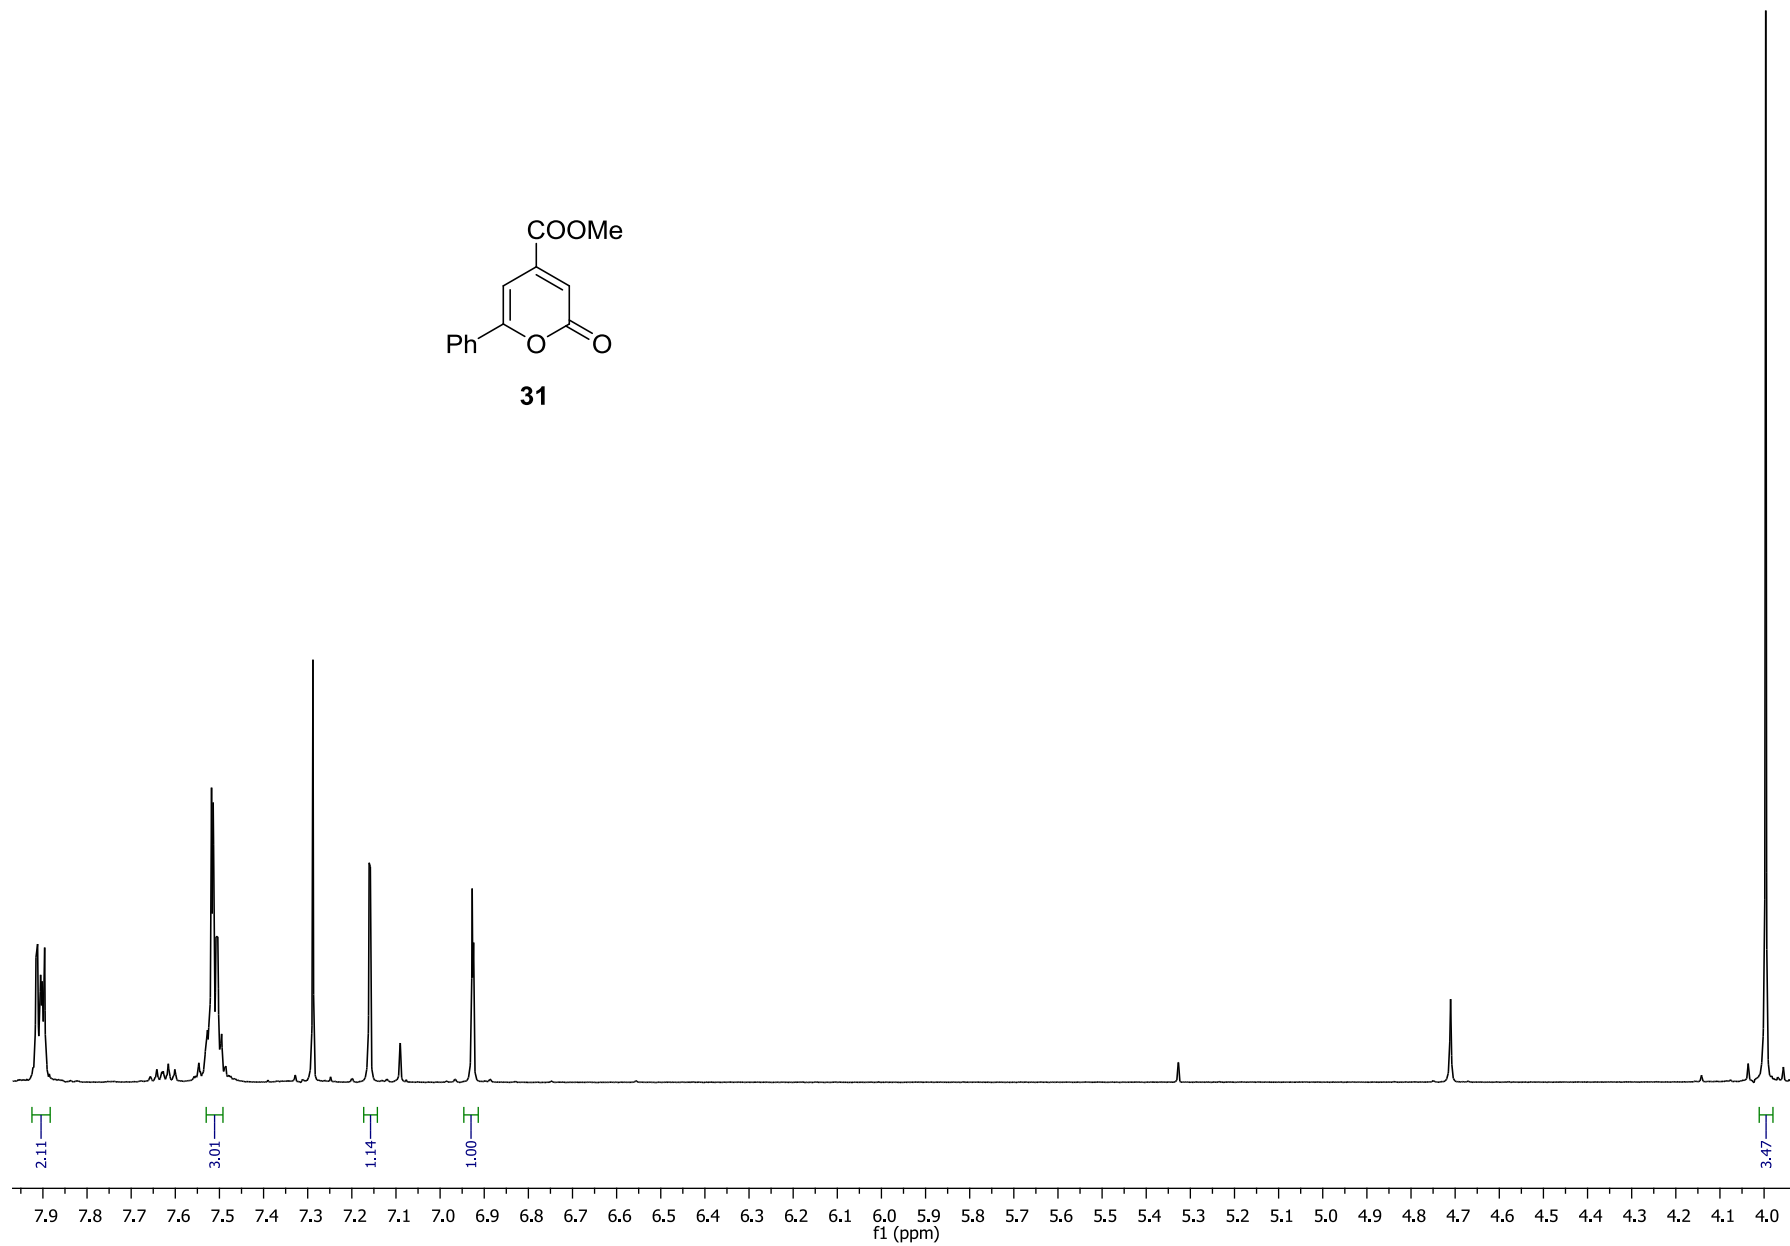

$^{13}\text{C}$  NMR (500 MHz,  $\text{CDCl}_3$ ):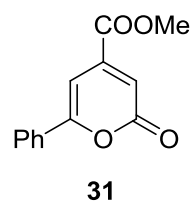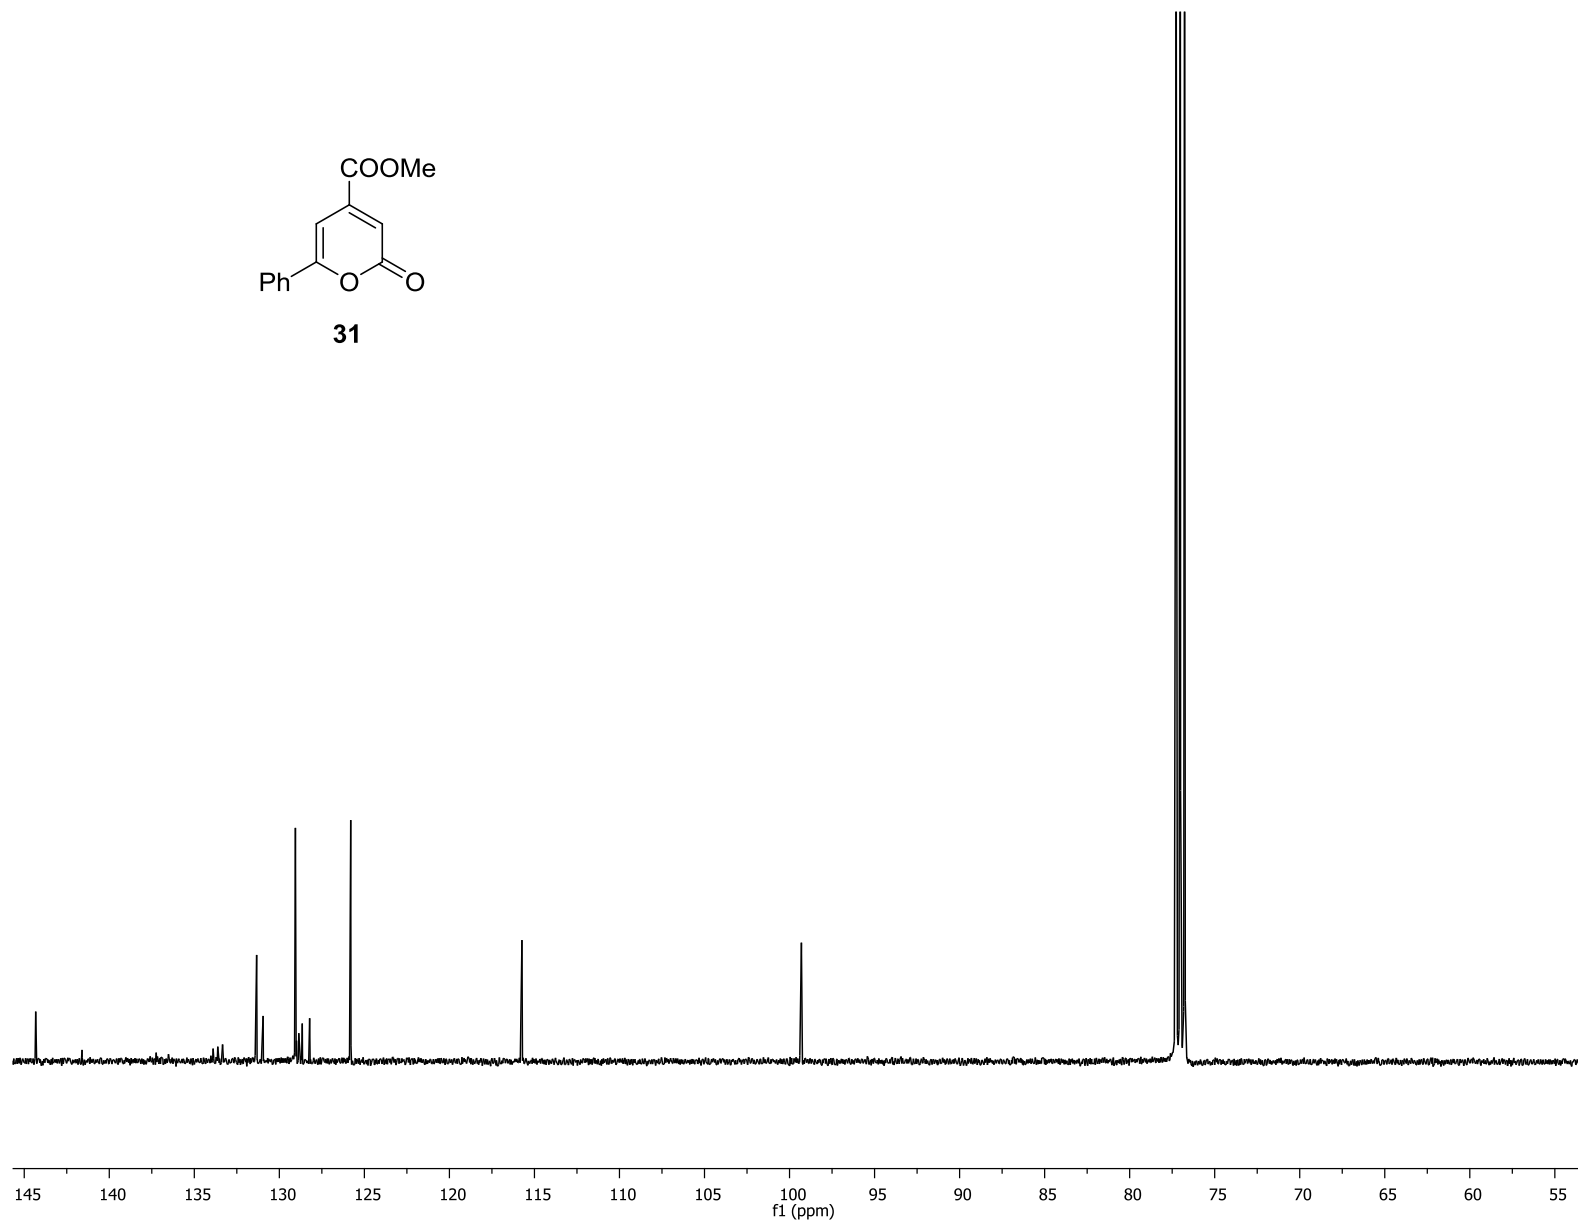

Supplement: NIHMS420306-supplement-2_si_002.pdf [file NIHMS420306-supplement-2_si_002.pdf]
